# Supplementary material
Source: publisher figshare collection journal article supplement (https://acs.figshare.com/ndownloader/files/10740883)
Supplement: Supplementary file 1 [file 10740883]

 
data_4c
 
_audit_creation_method            'SHELXL-2014/7'
_shelx_SHELXL_version_number      '2014/7'
_chemical_name_systematic         ?
_chemical_name_common             ?
_chemical_melting_point           ?
_chemical_formula_moiety          
 'C91 H59 Mn N4 O, C6 H6'
_chemical_formula_sum
 'C97 H65 Mn N4 O' 
_chemical_formula_weight          1357.47

loop_
 _atom_type_symbol
 _atom_type_description
 _atom_type_scat_dispersion_real
 _atom_type_scat_dispersion_imag
 _atom_type_scat_source
 'C'  'C'   0.0181   0.0091
 'International Tables Vol C Tables 4.2.6.8 and 6.1.1.4'
 'H'  'H'   0.0000   0.0000
 'International Tables Vol C Tables 4.2.6.8 and 6.1.1.4'
 'N'  'N'   0.0311   0.0180
 'International Tables Vol C Tables 4.2.6.8 and 6.1.1.4'
 'O'  'O'   0.0492   0.0322
 'International Tables Vol C Tables 4.2.6.8 and 6.1.1.4'
 'Mn'  'Mn'  -0.5299   2.8052
 'International Tables Vol C Tables 4.2.6.8 and 6.1.1.4'
 
_space_group_crystal_system       triclinic
_space_group_IT_number            2
_space_group_name_H-M_alt         'P -1'
_space_group_name_Hall            '-P 1'
 
_shelx_space_group_comment
;
The symmetry employed for this shelxl refinement is uniquely defined
by the following loop, which should always be used as a source of
symmetry information in preference to the above space-group names.
They are only intended as comments.
;
 
loop_
 _space_group_symop_operation_xyz
 'x, y, z'
 '-x, -y, -z'
 
_cell_length_a                    14.2994(3)
_cell_length_b                    16.0576(3)
_cell_length_c                    21.1400(3)
_cell_angle_alpha                 95.3261(13)
_cell_angle_beta                  105.4473(15)
_cell_angle_gamma                 110.6070(16)
_cell_volume                      4284.67(14)
_cell_formula_units_Z             2
_cell_measurement_temperature     110(2)
_cell_measurement_reflns_used     19229
_cell_measurement_theta_min       3.00
_cell_measurement_theta_max       71.96
 
_exptl_crystal_description        'thick lath'
_exptl_crystal_colour             black
_exptl_crystal_density_meas       ?
_exptl_crystal_density_method     ?
_exptl_crystal_density_diffrn     1.052          
_exptl_crystal_F_000              1416
_exptl_transmission_factor_min    ?
_exptl_transmission_factor_max    ?
_exptl_crystal_size_max           0.41
_exptl_crystal_size_mid           0.20
_exptl_crystal_size_min           0.11
_exptl_absorpt_coefficient_mu     1.604
_shelx_estimated_absorpt_T_min    ?
_shelx_estimated_absorpt_T_max    ?
_exptl_absorpt_correction_type    analytical
_exptl_absorpt_correction_T_min   0.624
_exptl_absorpt_correction_T_max   0.858
_exptl_absorpt_process_details    
;
CrysAlisPro, Agilent Technologies,
Version 1.171.36.32 (release 02-08-2013 CrysAlis171 .NET)
(compiled Aug  2 2013,16:46:58)
Analytical numeric absorption correction using a multifaceted crystal
			model based on expressions derived by R.C. Clark & J.S. Reid.
(Clark, R. C. & Reid, J. S. (1995). Acta Cryst. A51, 887-897)
;
_exptl_absorpt_special_details    ?
_diffrn_ambient_temperature       110(2)
_diffrn_radiation_wavelength      1.54178
_diffrn_radiation_type            CuK\a
_diffrn_radiation_source          'SuperNova (Cu) X-ray Source' 
_diffrn_radiation_monochromator   'mirror' 
_diffrn_measurement_device_type   'SuperNova, Dual, Cu at zero, Atlas' 
_diffrn_measurement_method        '\w scans'
_diffrn_standards_number          '.'
_diffrn_standards_interval_time   '.'
_diffrn_standards_decay_%         '.'
_diffrn_reflns_number             54944
_diffrn_reflns_av_unetI/netI      0.0315
_diffrn_reflns_av_R_equivalents   0.0339
_diffrn_reflns_limit_h_min        -16
_diffrn_reflns_limit_h_max        17
_diffrn_reflns_limit_k_min        -19
_diffrn_reflns_limit_k_max        19
_diffrn_reflns_limit_l_min        -26
_diffrn_reflns_limit_l_max        26
_diffrn_reflns_theta_min          2.216
_diffrn_reflns_theta_max          71.899
_diffrn_reflns_theta_full         67.679
_diffrn_measured_fraction_theta_max   0.998
_diffrn_measured_fraction_theta_full  0.999
_diffrn_reflns_Laue_measured_fraction_max    0.998
_diffrn_reflns_Laue_measured_fraction_full   0.999
_diffrn_reflns_point_group_measured_fraction_max   0.998
_diffrn_reflns_point_group_measured_fraction_full  0.999
_reflns_number_total              16788
_reflns_number_gt                 14426
_reflns_threshold_expression      'I > 2\s(I)'
_reflns_Friedel_coverage          0.000
_reflns_Friedel_fraction_max      .
_reflns_Friedel_fraction_full     .
 
_reflns_special_details
;
 Reflections were merged by SHELXL according to the crystal
 class for the calculation of statistics and refinement.
 
 Structure factors included contributions from the .fab file.
 
 _reflns_Friedel_fraction is defined as the number of unique
 Friedel pairs measured divided by the number that would be
 possible theoretically, ignoring centric projections and
 systematic absences.
;
 
_computing_data_collection
;
CrysAlisPro, Agilent Technologies,
Version 1.171.36.32 (release 02-08-2013 CrysAlis171 .NET)
(compiled Aug  2 2013,16:46:58)
;
_computing_cell_refinement
;
CrysAlisPro, Agilent Technologies,
Version 1.171.36.32 (release 02-08-2013 CrysAlis171 .NET)
(compiled Aug  2 2013,16:46:58)
;
_computing_data_reduction         
;
CrysAlisPro, Agilent Technologies,
Version 1.171.36.32 (release 02-08-2013 CrysAlis171 .NET)
(compiled Aug  2 2013,16:46:58)
;
_computing_structure_solution     'SHELXS-2014/7 (Sheldrick, 2015)'
_computing_structure_refinement   'SHELXL-2014/7 (Sheldrick, 2015)'
_computing_molecular_graphics     'SHELXTL v6.10 (Sheldrick, 2008)'
_computing_publication_material   'SHELXTL v6.10 (Sheldrick, 2008)'
_refine_special_details           ?
_refine_ls_structure_factor_coef  Fsqd
_refine_ls_matrix_type            full
_refine_ls_weighting_scheme       calc
_refine_ls_weighting_details
'w=1/[\s^2^(Fo^2^)+(0.0674P)^2^+0.8410P] where P=(Fo^2^+2Fc^2^)/3'
_atom_sites_solution_primary      direct
_atom_sites_solution_secondary    difmap
_atom_sites_solution_hydrogens    geom
_refine_ls_hydrogen_treatment     constr
_refine_ls_extinction_method      'SHELXL-2014/7 (Sheldrick 2014'
_refine_ls_extinction_coef        0.00038(6)
_refine_ls_extinction_expression
 'Fc^*^=kFc[1+0.001xFc^2^\l^3^/sin(2\q)]^-1/4^'
_refine_ls_number_reflns          16788
_refine_ls_number_parameters      1266
_refine_ls_number_restraints      1252
_refine_ls_R_factor_all           0.0517
_refine_ls_R_factor_gt            0.0442
_refine_ls_wR_factor_ref          0.1251
_refine_ls_wR_factor_gt           0.1190
_refine_ls_goodness_of_fit_ref    1.016
_refine_ls_restrained_S_all       1.001
_refine_ls_shift/su_max           0.001
_refine_ls_shift/su_mean          0.000
 
loop_
 _atom_site_label
 _atom_site_type_symbol
 _atom_site_fract_x
 _atom_site_fract_y
 _atom_site_fract_z
 _atom_site_U_iso_or_equiv
 _atom_site_adp_type
 _atom_site_occupancy
 _atom_site_site_symmetry_order  
 _atom_site_calc_flag
 _atom_site_refinement_flags_posn
 _atom_site_refinement_flags_adp
 _atom_site_refinement_flags_occupancy
 _atom_site_disorder_assembly
 _atom_site_disorder_group
Mn1 Mn 0.20771(4) 0.13137(3) 0.79077(2) 0.03205(16) Uani 0.7270(18) 1 d . . P A 1
O1 O 0.27575(12) 0.07128(11) 0.76208(8) 0.0452(4) Uani 0.7270(18) 1 d . . P A 1
Mn1' Mn 0.17391(11) 0.16098(9) 0.80493(6) 0.0366(5) Uani 0.2730(18) 1 d . . P A 2
O1' O 0.0998(3) 0.2140(3) 0.8271(2) 0.0468(11) Uani 0.2730(18) 1 d . . P A 2
C1 C 0.22181(12) 0.25901(10) 0.70803(7) 0.0370(3) Uani 1 1 d . . . . .
C2 C 0.17888(13) 0.27151(11) 0.64287(8) 0.0424(4) Uani 1 1 d . . . . .
H2 H 0.2088 0.3218 0.6239 0.051 Uiso 1 1 calc R U . . .
C3 C 0.08547(13) 0.19709(11) 0.61192(8) 0.0415(3) Uani 1 1 d . . . . .
H3 H 0.0393 0.1870 0.5678 0.050 Uiso 1 1 calc R U . . .
C4 C 0.07070(12) 0.13818(11) 0.65794(7) 0.0363(3) Uani 1 1 d . . . . .
C5 C -0.00860(12) 0.05467(11) 0.65307(7) 0.0363(3) Uani 1 1 d . . . . .
C6 C -0.00762(11) 0.00873(10) 0.70628(7) 0.0363(3) Uani 1 1 d . . . . .
C7 C -0.08540(12) -0.07667(11) 0.70579(7) 0.0403(3) Uani 1 1 d . . . . .
H7 H -0.1473 -0.1122 0.6693 0.048 Uiso 1 1 calc R U . . .
C8 C -0.05575(12) -0.09820(10) 0.76626(7) 0.0388(3) Uani 1 1 d . . . . .
H8 H -0.0922 -0.1521 0.7794 0.047 Uiso 1 1 calc R U . . .
C9 C 0.04013(11) -0.02532(10) 0.80682(7) 0.0334(3) Uani 1 1 d . . . . .
C10 C 0.09588(11) -0.01742(10) 0.87349(7) 0.0324(3) Uani 1 1 d D . . . .
C11 C 0.18690(11) 0.05838(9) 0.91116(7) 0.0315(3) Uani 1 1 d . . . . .
C12 C 0.24459(12) 0.07304(10) 0.98040(7) 0.0347(3) Uani 1 1 d . . . . .
H12 H 0.2262 0.0344 1.0104 0.042 Uiso 1 1 calc R U . . .
C13 C 0.33068(11) 0.15248(10) 0.99579(7) 0.0334(3) Uani 1 1 d . . . . .
H13 H 0.3834 0.1788 1.0384 0.040 Uiso 1 1 calc R U . . .
C14 C 0.32798(11) 0.18923(9) 0.93690(7) 0.0308(3) Uani 1 1 d . . . . .
C15 C 0.40503(11) 0.26865(9) 0.93062(7) 0.0312(3) Uani 1 1 d . . . . .
C16 C 0.39437(11) 0.30058(9) 0.87160(7) 0.0318(3) Uani 1 1 d . . . . .
C17 C 0.45832(12) 0.37983(10) 0.85409(7) 0.0364(3) Uani 1 1 d . . . . .
H17 H 0.5249 0.4236 0.8821 0.044 Uiso 1 1 calc R U . . .
C18 C 0.40647(12) 0.38173(11) 0.78954(8) 0.0395(3) Uani 1 1 d . . . . .
H18 H 0.4302 0.4271 0.7651 0.047 Uiso 1 1 calc R U . . .
C19 C 0.31086(12) 0.30302(10) 0.76638(7) 0.0352(3) Uani 1 1 d . . . . .
C20 C -0.10085(12) 0.01056(11) 0.59020(7) 0.0381(3) Uani 1 1 d . . . . .
C21 C -0.17769(12) 0.04761(12) 0.57405(8) 0.0427(4) Uani 1 1 d . . . . .
C22 C -0.26838(13) 0.00198(13) 0.51866(8) 0.0465(4) Uani 1 1 d . . . . .
H22 H -0.3198 0.0275 0.5073 0.056 Uiso 1 1 calc R U . . .
C23 C -0.28514(13) -0.07951(13) 0.47993(8) 0.0462(4) Uani 1 1 d . . . . .
C24 C -0.20770(13) -0.11444(12) 0.49569(8) 0.0437(4) Uani 1 1 d . . . . .
H24 H -0.2177 -0.1694 0.4686 0.052 Uiso 1 1 calc R U . . .
C25 C -0.11528(12) -0.07095(11) 0.55042(7) 0.0394(3) Uani 1 1 d . . . . .
C26 C -0.16624(13) 0.13277(13) 0.61599(9) 0.0480(4) Uani 1 1 d . . . . .
C27 C -0.15994(14) 0.13754(15) 0.68360(9) 0.0545(5) Uani 1 1 d . . . . .
H27 H -0.1650 0.0855 0.7027 0.065 Uiso 1 1 calc R U . . .
C28 C -0.14650(15) 0.21722(18) 0.72242(11) 0.0672(6) Uani 1 1 d . . . . .
H28 H -0.1426 0.2198 0.7682 0.081 Uiso 1 1 calc R U . . .
C29 C -0.13867(16) 0.29280(18) 0.69540(13) 0.0753(7) Uani 1 1 d . . . . .
H29 H -0.1280 0.3479 0.7227 0.090 Uiso 1 1 calc R U . . .
C30 C -0.14633(17) 0.28885(16) 0.62843(14) 0.0714(6) Uani 1 1 d . . . . .
H30 H -0.1417 0.3411 0.6097 0.086 Uiso 1 1 calc R U . . .
C31 C -0.16071(15) 0.20873(14) 0.58857(11) 0.0573(5) Uani 1 1 d . . . . .
H31 H -0.1667 0.2060 0.5425 0.069 Uiso 1 1 calc R U . . .
C32 C -0.38535(14) -0.13094(14) 0.42400(9) 0.0525(4) Uani 1 1 d . . . . .
C33 C -0.48105(16) -0.1400(2) 0.43308(11) 0.0807(8) Uani 1 1 d . . . . .
H33 H -0.4817 -0.1111 0.4742 0.097 Uiso 1 1 calc R U . . .
C34 C -0.57582(17) -0.1910(2) 0.38240(12) 0.0859(9) Uani 1 1 d . . . . .
H34 H -0.6409 -0.1972 0.3890 0.103 Uiso 1 1 calc R U . . .
C35 C -0.57497(16) -0.23279(16) 0.32235(10) 0.0670(6) Uani 1 1 d . . . . .
H35 H -0.6396 -0.2682 0.2879 0.080 Uiso 1 1 calc R U . . .
C36 C -0.48054(16) -0.22307(15) 0.31249(9) 0.0604(5) Uani 1 1 d . . . . .
H36 H -0.4802 -0.2511 0.2710 0.072 Uiso 1 1 calc R U . . .
C37 C -0.38536(15) -0.17225(14) 0.36325(9) 0.0533(4) Uani 1 1 d . . . . .
H37 H -0.3205 -0.1659 0.3563 0.064 Uiso 1 1 calc R U . . .
C38 C -0.03790(14) -0.11458(11) 0.56634(7) 0.0422(4) Uani 1 1 d . . . . .
C39 C -0.07248(17) -0.20687(13) 0.56876(10) 0.0553(5) Uani 1 1 d . . . . .
H39 H -0.1456 -0.2418 0.5591 0.066 Uiso 1 1 calc R U . . .
C40 C -0.0011(2) -0.24775(16) 0.58504(14) 0.0731(6) Uani 1 1 d . . . . .
H40 H -0.0256 -0.3106 0.5863 0.088 Uiso 1 1 calc R U . . .
C41 C 0.1055(2) -0.19769(19) 0.59941(14) 0.0773(7) Uani 1 1 d . . . . .
H41 H 0.1544 -0.2255 0.6118 0.093 Uiso 1 1 calc R U . . .
C42 C 0.14056(17) -0.10695(16) 0.59562(11) 0.0612(5) Uani 1 1 d . . . . .
H42 H 0.2136 -0.0727 0.6043 0.073 Uiso 1 1 calc R U . . .
C43 C 0.06934(14) -0.06587(13) 0.57918(8) 0.0463(4) Uani 1 1 d . . . . .
H43 H 0.0942 -0.0035 0.5766 0.056 Uiso 1 1 calc R U . . .
C44 C 0.06098(12) -0.09448(10) 0.90805(7) 0.0359(3) Uani 0.698(6) 1 d D U P B 1
C45 C 0.1270(6) -0.1402(6) 0.9305(5) 0.0396(10) Uani 0.698(6) 1 d D U P B 1
C46 C 0.1018(5) -0.2008(4) 0.9723(3) 0.0401(11) Uani 0.698(6) 1 d D U P B 1
H46 H 0.1493 -0.2283 0.9900 0.048 Uiso 0.698(6) 1 calc R U P B 1
C47 C 0.0092(4) -0.2225(3) 0.9892(2) 0.0382(10) Uani 0.698(6) 1 d D U P B 1
C48 C -0.0605(5) -0.1835(4) 0.9623(3) 0.0345(10) Uani 0.698(6) 1 d D U P B 1
H48 H -0.1257 -0.2004 0.9712 0.041 Uiso 0.698(6) 1 calc R U P B 1
C49 C -0.0362(5) -0.1187(6) 0.9217(6) 0.0356(11) Uani 0.698(6) 1 d D U P B 1
C50 C 0.2241(6) -0.1233(8) 0.9116(4) 0.0424(11) Uani 0.698(6) 1 d D U P B 1
C51 C 0.2230(6) -0.1253(11) 0.8451(4) 0.0521(15) Uani 0.698(6) 1 d D U P B 1
H51 H 0.1591 -0.1350 0.8111 0.063 Uiso 0.698(6) 1 calc R U P B 1
C52 C 0.3133(5) -0.1135(6) 0.8275(3) 0.0598(14) Uani 0.698(6) 1 d D U P B 1
H52 H 0.3112 -0.1134 0.7822 0.072 Uiso 0.698(6) 1 calc R U P B 1
C53 C 0.4057(4) -0.1021(4) 0.8757(3) 0.0562(12) Uani 0.698(6) 1 d D U P B 1
H53 H 0.4667 -0.0966 0.8636 0.067 Uiso 0.698(6) 1 calc R U P B 1
C54 C 0.4091(5) -0.0987(5) 0.9424(3) 0.0540(12) Uani 0.698(6) 1 d D U P B 1
H54 H 0.4730 -0.0897 0.9759 0.065 Uiso 0.698(6) 1 calc R U P B 1
C55 C 0.3192(5) -0.1084(7) 0.9603(3) 0.0475(11) Uani 0.698(6) 1 d D U P B 1
H55 H 0.3229 -0.1048 1.0061 0.057 Uiso 0.698(6) 1 calc R U P B 1
C56 C -0.0092(3) -0.2834(3) 1.0375(2) 0.0441(9) Uani 0.698(6) 1 d D U P B 1
C57 C 0.0218(3) -0.3567(3) 1.0372(2) 0.0557(10) Uani 0.698(6) 1 d D U P B 1
H57 H 0.0533 -0.3683 1.0049 0.067 Uiso 0.698(6) 1 calc R U P B 1
C58 C 0.0079(3) -0.4129(3) 1.0827(2) 0.0645(12) Uani 0.698(6) 1 d D U P B 1
H58 H 0.0294 -0.4625 1.0813 0.077 Uiso 0.698(6) 1 calc R U P B 1
C59 C -0.0374(3) -0.3965(3) 1.1299(2) 0.0660(12) Uani 0.698(6) 1 d D U P B 1
H59 H -0.0465 -0.4345 1.1616 0.079 Uiso 0.698(6) 1 calc R U P B 1
C60 C -0.0698(3) -0.3243(3) 1.13120(16) 0.0634(11) Uani 0.698(6) 1 d D U P B 1
H60 H -0.1010 -0.3131 1.1637 0.076 Uiso 0.698(6) 1 calc R U P B 1
C61 C -0.0563(3) -0.2681(3) 1.08463(17) 0.0517(9) Uani 0.698(6) 1 d D U P B 1
H61 H -0.0794 -0.2194 1.0852 0.062 Uiso 0.698(6) 1 calc R U P B 1
C62 C -0.1193(5) -0.0841(5) 0.8946(5) 0.0347(11) Uani 0.698(6) 1 d D U P B 1
C63 C -0.2238(6) -0.1486(6) 0.8648(9) 0.0409(13) Uani 0.698(6) 1 d D U P B 1
H63 H -0.2389 -0.2114 0.8633 0.049 Uiso 0.698(6) 1 calc R U P B 1
C64 C -0.3047(6) -0.1208(4) 0.8375(6) 0.0451(12) Uani 0.698(6) 1 d D U P B 1
H64 H -0.3744 -0.1647 0.8159 0.054 Uiso 0.698(6) 1 calc R U P B 1
C65 C -0.2838(5) -0.0290(4) 0.8417(4) 0.0460(12) Uani 0.698(6) 1 d D U P B 1
H65 H -0.3393 -0.0101 0.8230 0.055 Uiso 0.698(6) 1 calc R U P B 1
C66 C -0.1814(4) 0.0356(4) 0.8732(3) 0.0399(11) Uani 0.698(6) 1 d D U P B 1
H66 H -0.1674 0.0985 0.8765 0.048 Uiso 0.698(6) 1 calc R U P B 1
C67 C -0.1005(5) 0.0083(5) 0.8996(5) 0.0377(13) Uani 0.698(6) 1 d D U P B 1
H67 H -0.0311 0.0527 0.9214 0.045 Uiso 0.698(6) 1 calc R U P B 1
C44' C 0.06098(12) -0.09448(10) 0.90805(7) 0.0359(3) Uani 0.302(6) 1 d D U P B 2
C45' C 0.1348(14) -0.1372(15) 0.9250(12) 0.043(2) Uani 0.302(6) 1 d D U P B 2
C46' C 0.1144(11) -0.2099(9) 0.9595(7) 0.041(2) Uani 0.302(6) 1 d D U P B 2
H46' H 0.1615 -0.2400 0.9687 0.049 Uiso 0.302(6) 1 calc R U P B 2
C47' C 0.0261(10) -0.2367(7) 0.9796(6) 0.037(2) Uani 0.302(6) 1 d D U P B 2
C48' C -0.0473(11) -0.1997(8) 0.9581(8) 0.037(2) Uani 0.302(6) 1 d D U P B 2
H48' H -0.1119 -0.2241 0.9675 0.045 Uiso 0.302(6) 1 calc R U P B 2
C49' C -0.0327(13) -0.1288(15) 0.9235(14) 0.035(2) Uani 0.302(6) 1 d D U P B 2
C50' C 0.2273(12) -0.122(2) 0.9017(10) 0.044(2) Uani 0.302(6) 1 d D U P B 2
C51' C 0.2124(15) -0.128(3) 0.8340(9) 0.048(2) Uani 0.302(6) 1 d D U P B 2
H51' H 0.1465 -0.1343 0.8040 0.057 Uiso 0.302(6) 1 calc R U P B 2
C52' C 0.2944(12) -0.1248(13) 0.8103(7) 0.057(2) Uani 0.302(6) 1 d D U P B 2
H52' H 0.2823 -0.1339 0.7633 0.068 Uiso 0.302(6) 1 calc R U P B 2
C53' C 0.3923(13) -0.1091(12) 0.8524(6) 0.059(2) Uani 0.302(6) 1 d D U P B 2
H53' H 0.4483 -0.1028 0.8347 0.071 Uiso 0.302(6) 1 calc R U P B 2
C54' C 0.4107(10) -0.1024(11) 0.9205(7) 0.052(3) Uani 0.302(6) 1 d D U P B 2
H54' H 0.4787 -0.0918 0.9498 0.063 Uiso 0.302(6) 1 calc R U P B 2
C55' C 0.3260(13) -0.1118(17) 0.9455(7) 0.051(3) Uani 0.302(6) 1 d D U P B 2
H55' H 0.3355 -0.1114 0.9918 0.061 Uiso 0.302(6) 1 calc R U P B 2
C56' C 0.0086(7) -0.3057(6) 1.0229(5) 0.0447(18) Uani 0.302(6) 1 d D U P B 2
C57' C 0.0361(7) -0.3793(6) 1.0128(5) 0.0556(19) Uani 0.302(6) 1 d D U P B 2
H57' H 0.0635 -0.3864 0.9772 0.067 Uiso 0.302(6) 1 calc R U P B 2
C58' C 0.0246(7) -0.4431(7) 1.0535(5) 0.068(2) Uani 0.302(6) 1 d D U P B 2
H58' H 0.0421 -0.4942 1.0456 0.082 Uiso 0.302(6) 1 calc R U P B 2
C59' C -0.0136(8) -0.4297(8) 1.1064(6) 0.068(2) Uani 0.302(6) 1 d D U P B 2
H59' H -0.0194 -0.4707 1.1361 0.081 Uiso 0.302(6) 1 calc R U P B 2
C60' C -0.0425(7) -0.3590(7) 1.1156(5) 0.065(2) Uani 0.302(6) 1 d D U P B 2
H60' H -0.0708 -0.3525 1.1508 0.078 Uiso 0.302(6) 1 calc R U P B 2
C61' C -0.0314(7) -0.2941(6) 1.0737(5) 0.0526(19) Uani 0.302(6) 1 d D U P B 2
H61' H -0.0511 -0.2442 1.0808 0.063 Uiso 0.302(6) 1 calc R U P B 2
C62' C -0.1099(12) -0.0880(12) 0.9011(13) 0.038(2) Uani 0.302(6) 1 d D U P B 2
C63' C -0.2149(15) -0.1428(13) 0.866(2) 0.041(3) Uani 0.302(6) 1 d D U P B 2
H63' H -0.2355 -0.2069 0.8566 0.049 Uiso 0.302(6) 1 calc R U P B 2
C64' C -0.2913(15) -0.1073(12) 0.8437(15) 0.049(3) Uani 0.302(6) 1 d D U P B 2
H64' H -0.3632 -0.1467 0.8227 0.059 Uiso 0.302(6) 1 calc R U P B 2
C65' C -0.2610(12) -0.0139(11) 0.8525(9) 0.046(2) Uani 0.302(6) 1 d D U P B 2
H65' H -0.3112 0.0118 0.8368 0.055 Uiso 0.302(6) 1 calc R U P B 2
C66' C -0.1558(12) 0.0409(12) 0.8848(9) 0.046(3) Uani 0.302(6) 1 d D U P B 2
H66' H -0.1346 0.1050 0.8914 0.055 Uiso 0.302(6) 1 calc R U P B 2
C67' C -0.0815(14) 0.0067(12) 0.9075(13) 0.035(2) Uani 0.302(6) 1 d D U P B 2
H67' H -0.0097 0.0470 0.9279 0.042 Uiso 0.302(6) 1 calc R U P B 2
C68 C 0.50236(11) 0.31562(9) 0.99052(7) 0.0318(3) Uani 1 1 d . . . . .
C69 C 0.59567(11) 0.30342(10) 0.99244(7) 0.0341(3) Uani 1 1 d . . . . .
C70 C 0.68196(12) 0.33867(10) 1.05186(8) 0.0370(3) Uani 1 1 d . . . . .
H70 H 0.7443 0.3292 1.0532 0.044 Uiso 1 1 calc R U . . .
C71 C 0.67881(11) 0.38685(10) 1.10857(7) 0.0375(3) Uani 1 1 d D . . . .
C72 C 0.58690(11) 0.40096(10) 1.10517(7) 0.0357(3) Uani 1 1 d . . . . .
H72 H 0.5840 0.4349 1.1433 0.043 Uiso 1 1 calc R U . . .
C73 C 0.49890(11) 0.36643(9) 1.04705(7) 0.0329(3) Uani 1 1 d . . . . .
C74 C 0.60848(11) 0.25506(10) 0.93364(7) 0.0355(3) Uani 1 1 d . . . . .
C75 C 0.53726(12) 0.16792(11) 0.89794(8) 0.0393(3) Uani 1 1 d . . . . .
H75 H 0.4767 0.1378 0.9103 0.047 Uiso 1 1 calc R U . . .
C76 C 0.55432(14) 0.12521(11) 0.84466(9) 0.0451(4) Uani 1 1 d . . . . .
H76 H 0.5051 0.0662 0.8207 0.054 Uiso 1 1 calc R U . . .
C77 C 0.64240(14) 0.16767(12) 0.82600(9) 0.0463(4) Uani 1 1 d . . . . .
H77 H 0.6536 0.1381 0.7893 0.056 Uiso 1 1 calc R U . . .
C78 C 0.71399(14) 0.25360(12) 0.86124(9) 0.0462(4) Uani 1 1 d . . . . .
H78 H 0.7751 0.2829 0.8492 0.055 Uiso 1 1 calc R U . . .
C79 C 0.69654(12) 0.29696(11) 0.91414(8) 0.0409(3) Uani 1 1 d . . . . .
H79 H 0.7456 0.3564 0.9375 0.049 Uiso 1 1 calc R U . . .
C80 C 0.7779(8) 0.4172(15) 1.1665(6) 0.034(3) Uani 0.068(5) 1 d D U P C 1
C81 C 0.8397(17) 0.3668(17) 1.1771(12) 0.048(3) Uani 0.068(5) 1 d D U P C 1
H81 H 0.8195 0.3111 1.1470 0.057 Uiso 0.068(5) 1 calc R U P C 1
C82 C 0.9317(19) 0.3983(17) 1.2321(14) 0.063(3) Uani 0.068(5) 1 d D U P C 1
H82 H 0.9747 0.3643 1.2398 0.075 Uiso 0.068(5) 1 calc R U P C 1
C83 C 0.959(2) 0.4789(18) 1.2750(13) 0.067(4) Uani 0.068(5) 1 d D U P C 1
H83 H 1.0220 0.5001 1.3124 0.080 Uiso 0.068(5) 1 calc R U P C 1
C84 C 0.898(2) 0.530(2) 1.2651(14) 0.060(4) Uani 0.068(5) 1 d D U P C 1
H84 H 0.9185 0.5859 1.2953 0.072 Uiso 0.068(5) 1 calc R U P C 1
C85 C 0.807(2) 0.4987(19) 1.2102(14) 0.048(3) Uani 0.068(5) 1 d D U P C 1
H85 H 0.7638 0.5329 1.2025 0.058 Uiso 0.068(5) 1 calc R U P C 1
C80' C 0.76530(12) 0.42001(16) 1.17405(9) 0.0413(5) Uani 0.932(5) 1 d D U P C 2
C81' C 0.82070(15) 0.36698(15) 1.19632(11) 0.0484(5) Uani 0.932(5) 1 d D U P C 2
H81' H 0.8037 0.3095 1.1696 0.058 Uiso 0.932(5) 1 calc R U P C 2
C82' C 0.90114(18) 0.39772(17) 1.25781(12) 0.0610(7) Uani 0.932(5) 1 d D U P C 2
H82' H 0.9385 0.3609 1.2729 0.073 Uiso 0.932(5) 1 calc R U P C 2
C83' C 0.92685(18) 0.48084(18) 1.29682(11) 0.0668(7) Uani 0.932(5) 1 d D U P C 2
H83' H 0.9817 0.5014 1.3387 0.080 Uiso 0.932(5) 1 calc R U P C 2
C84' C 0.87281(18) 0.53442(19) 1.27501(13) 0.0648(7) Uani 0.932(5) 1 d D U P C 2
H84' H 0.8906 0.5920 1.3019 0.078 Uiso 0.932(5) 1 calc R U P C 2
C85' C 0.79257(18) 0.50449(18) 1.21391(13) 0.0520(6) Uani 0.932(5) 1 d D U P C 2
H85' H 0.7559 0.5419 1.1991 0.062 Uiso 0.932(5) 1 calc R U P C 2
C86 C 0.40623(11) 0.38663(9) 1.04985(7) 0.0346(3) Uani 1 1 d . . . . .
C87 C 0.37258(12) 0.37569(10) 1.10609(8) 0.0386(3) Uani 1 1 d . . . . .
H87 H 0.4040 0.3488 1.1392 0.046 Uiso 1 1 calc R U . . .
C88 C 0.29432(13) 0.40334(11) 1.11426(9) 0.0442(4) Uani 1 1 d . . . . .
H88 H 0.2720 0.3951 1.1526 0.053 Uiso 1 1 calc R U . . .
C89 C 0.24869(13) 0.44307(11) 1.06627(9) 0.0463(4) Uani 1 1 d . . . . .
H89 H 0.1960 0.4633 1.0721 0.056 Uiso 1 1 calc R U . . .
C90 C 0.28004(13) 0.45330(11) 1.00974(9) 0.0441(4) Uani 1 1 d . . . . .
H90 H 0.2477 0.4796 0.9766 0.053 Uiso 1 1 calc R U . . .
C91 C 0.35822(12) 0.42544(10) 1.00136(8) 0.0379(3) Uani 1 1 d . . . . .
H91 H 0.3792 0.4328 0.9625 0.046 Uiso 1 1 calc R U . . .
N1 N 0.15516(10) 0.17813(9) 0.71629(6) 0.0359(3) Uani 1 1 d . . . . .
N2 N 0.06900(9) 0.03988(8) 0.76923(6) 0.0330(3) Uani 1 1 d . . . . .
N3 N 0.23775(9) 0.13119(8) 0.88500(6) 0.0304(2) Uani 1 1 d . . . . .
N4 N 0.30563(9) 0.25507(8) 0.81627(6) 0.0325(3) Uani 1 1 d . . . . .
C1S C 0.1073(5) 0.4114(5) 0.1868(3) 0.0625(13) Uani 0.687(9) 1 d D U P D 1
H1S H 0.0736 0.4059 0.1405 0.075 Uiso 0.687(9) 1 calc R U P D 1
C2S C 0.0906(4) 0.3357(4) 0.2149(3) 0.0622(12) Uani 0.687(9) 1 d D U P D 1
H2S H 0.0448 0.2774 0.1877 0.075 Uiso 0.687(9) 1 calc R U P D 1
C3S C 0.1400(4) 0.3436(3) 0.2827(2) 0.0753(13) Uani 0.687(9) 1 d D U P D 1
H3S H 0.1280 0.2909 0.3016 0.090 Uiso 0.687(9) 1 calc R U P D 1
C4S C 0.2066(5) 0.4281(3) 0.3226(3) 0.0986(18) Uani 0.687(9) 1 d D U P D 1
H4S H 0.2402 0.4339 0.3690 0.118 Uiso 0.687(9) 1 calc R U P D 1
C5S C 0.2237(5) 0.5044(3) 0.2942(3) 0.0978(17) Uani 0.687(9) 1 d D U P D 1
H5S H 0.2697 0.5629 0.3210 0.117 Uiso 0.687(9) 1 calc R U P D 1
C6S C 0.1739(5) 0.4950(5) 0.2271(4) 0.0796(16) Uani 0.687(9) 1 d D U P D 1
H6S H 0.1857 0.5476 0.2081 0.095 Uiso 0.687(9) 1 calc R U P D 1
C1S' C 0.0978(12) 0.4207(12) 0.1925(8) 0.067(3) Uani 0.313(9) 1 d D U P D 2
H1S' H 0.0395 0.4172 0.1564 0.080 Uiso 0.313(9) 1 calc R U P D 2
C2S' C 0.0977(12) 0.3451(11) 0.2183(9) 0.079(3) Uani 0.313(9) 1 d D U P D 2
H2S' H 0.0392 0.2888 0.1988 0.094 Uiso 0.313(9) 1 calc R U P D 2
C3S' C 0.1810(11) 0.3491(7) 0.2723(6) 0.091(3) Uani 0.313(9) 1 d D U P D 2
H3S' H 0.1831 0.2954 0.2870 0.109 Uiso 0.313(9) 1 calc R U P D 2
C4S' C 0.2602(11) 0.4328(6) 0.3039(6) 0.099(3) Uani 0.313(9) 1 d D U P D 2
H4S' H 0.3130 0.4389 0.3444 0.119 Uiso 0.313(9) 1 calc R U P D 2
C5S' C 0.2626(11) 0.5078(7) 0.2764(6) 0.090(2) Uani 0.313(9) 1 d D U P D 2
H5S' H 0.3197 0.5647 0.2968 0.108 Uiso 0.313(9) 1 calc R U P D 2
C6S' C 0.1840(13) 0.5015(11) 0.2200(8) 0.079(3) Uani 0.313(9) 1 d D U P D 2
H6S' H 0.1889 0.5528 0.2000 0.095 Uiso 0.313(9) 1 calc R U P D 2
 
loop_
 _atom_site_aniso_label
 _atom_site_aniso_U_11
 _atom_site_aniso_U_22
 _atom_site_aniso_U_33
 _atom_site_aniso_U_23
 _atom_site_aniso_U_13
 _atom_site_aniso_U_12
Mn1 0.0271(2) 0.0299(2) 0.02332(17) 0.00338(14) 0.00178(14) -0.00199(16)
O1 0.0301(7) 0.0412(8) 0.0456(9) 0.0151(7) 0.0014(6) -0.0012(6)
Mn1' 0.0317(6) 0.0341(6) 0.0254(5) 0.0056(4) -0.0001(4) -0.0014(5)
O1' 0.037(2) 0.063(3) 0.037(2) 0.0099(19) 0.0107(17) 0.016(2)
C1 0.0328(7) 0.0363(7) 0.0299(7) 0.0060(6) 0.0071(6) 0.0021(6)
C2 0.0404(8) 0.0411(8) 0.0316(7) 0.0094(6) 0.0061(6) 0.0034(7)
C3 0.0379(8) 0.0446(8) 0.0274(7) 0.0074(6) 0.0029(6) 0.0051(7)
C4 0.0305(7) 0.0410(8) 0.0238(6) 0.0021(6) 0.0025(6) 0.0041(6)
C5 0.0297(7) 0.0409(8) 0.0239(6) 0.0020(6) 0.0022(6) 0.0033(6)
C6 0.0276(7) 0.0397(8) 0.0244(7) -0.0008(6) 0.0015(5) 0.0003(6)
C7 0.0314(7) 0.0405(8) 0.0268(7) -0.0006(6) 0.0028(6) -0.0047(6)
C8 0.0338(7) 0.0343(7) 0.0297(7) 0.0012(6) 0.0059(6) -0.0036(6)
C9 0.0283(7) 0.0307(7) 0.0283(7) 0.0028(5) 0.0058(6) 0.0000(6)
C10 0.0285(7) 0.0301(7) 0.0282(7) 0.0041(5) 0.0061(5) 0.0020(5)
C11 0.0277(7) 0.0296(7) 0.0273(6) 0.0044(5) 0.0054(5) 0.0027(5)
C12 0.0318(7) 0.0336(7) 0.0279(7) 0.0064(5) 0.0059(6) 0.0032(6)
C13 0.0283(7) 0.0327(7) 0.0255(6) 0.0028(5) 0.0020(5) 0.0017(6)
C14 0.0235(6) 0.0307(7) 0.0263(6) 0.0009(5) 0.0014(5) 0.0028(5)
C15 0.0245(6) 0.0294(6) 0.0291(7) 0.0013(5) 0.0030(5) 0.0036(5)
C16 0.0250(6) 0.0278(6) 0.0292(7) -0.0006(5) 0.0020(5) 0.0012(5)
C17 0.0294(7) 0.0313(7) 0.0332(7) 0.0029(6) 0.0044(6) -0.0007(6)
C18 0.0359(8) 0.0343(7) 0.0347(7) 0.0085(6) 0.0071(6) 0.0007(6)
C19 0.0327(7) 0.0336(7) 0.0289(7) 0.0058(6) 0.0065(6) 0.0037(6)
C20 0.0308(7) 0.0434(8) 0.0236(7) 0.0036(6) 0.0031(6) 0.0004(6)
C21 0.0323(8) 0.0507(9) 0.0287(7) 0.0009(6) 0.0036(6) 0.0036(7)
C22 0.0335(8) 0.0587(10) 0.0324(8) 0.0012(7) 0.0026(6) 0.0089(7)
C23 0.0328(8) 0.0578(10) 0.0283(7) -0.0010(7) 0.0018(6) 0.0032(7)
C24 0.0375(8) 0.0454(9) 0.0281(7) -0.0006(6) 0.0032(6) 0.0003(7)
C25 0.0343(7) 0.0427(8) 0.0256(7) 0.0040(6) 0.0044(6) 0.0017(6)
C26 0.0281(7) 0.0577(10) 0.0402(9) -0.0057(7) 0.0023(6) 0.0064(7)
C27 0.0345(8) 0.0723(12) 0.0407(9) -0.0086(8) 0.0035(7) 0.0138(8)
C28 0.0375(9) 0.0873(16) 0.0521(11) -0.0238(11) 0.0034(8) 0.0133(10)
C29 0.0407(10) 0.0694(15) 0.0838(16) -0.0314(13) 0.0044(10) 0.0076(10)
C30 0.0508(11) 0.0534(12) 0.0856(17) -0.0082(11) 0.0087(11) 0.0075(9)
C31 0.0422(9) 0.0538(11) 0.0583(11) -0.0027(9) 0.0083(8) 0.0077(8)
C32 0.0352(8) 0.0644(11) 0.0342(8) -0.0039(8) -0.0021(7) 0.0053(8)
C33 0.0363(10) 0.121(2) 0.0458(11) -0.0253(12) 0.0006(8) 0.0061(11)
C34 0.0345(10) 0.125(2) 0.0570(13) -0.0207(14) -0.0017(9) 0.0051(12)
C35 0.0426(10) 0.0753(14) 0.0450(10) -0.0093(9) -0.0114(8) 0.0035(9)
C36 0.0524(11) 0.0677(12) 0.0366(9) -0.0105(8) -0.0079(8) 0.0169(10)
C37 0.0436(9) 0.0629(11) 0.0353(8) -0.0047(8) -0.0026(7) 0.0149(8)
C38 0.0440(9) 0.0445(8) 0.0258(7) 0.0047(6) 0.0058(6) 0.0078(7)
C39 0.0554(11) 0.0464(10) 0.0501(10) 0.0096(8) 0.0118(9) 0.0079(8)
C40 0.0823(16) 0.0549(12) 0.0835(16) 0.0222(11) 0.0259(13) 0.0271(12)
C41 0.0750(16) 0.0805(16) 0.0895(18) 0.0288(14) 0.0266(14) 0.0425(14)
C42 0.0496(11) 0.0718(13) 0.0590(12) 0.0136(10) 0.0146(9) 0.0222(10)
C43 0.0422(9) 0.0514(9) 0.0365(8) 0.0068(7) 0.0094(7) 0.0110(7)
C44 0.0326(7) 0.0303(7) 0.0264(6) 0.0032(5) 0.0008(5) -0.0018(6)
C45 0.0310(16) 0.0327(18) 0.037(2) 0.0052(13) 0.0024(12) -0.0014(14)
C46 0.0338(18) 0.0345(16) 0.038(2) 0.0082(15) 0.0021(13) 0.0039(12)
C47 0.0298(17) 0.0334(17) 0.0346(16) 0.0075(13) 0.0024(11) -0.0012(12)
C48 0.0319(16) 0.0294(18) 0.0288(15) 0.0050(14) 0.0042(11) 0.0008(11)
C49 0.0336(16) 0.027(2) 0.0267(16) 0.0033(14) 0.0029(14) -0.0056(12)
C50 0.0407(17) 0.0305(14) 0.047(2) 0.0093(18) 0.0087(14) 0.0069(13)
C51 0.048(2) 0.048(2) 0.053(3) 0.009(3) 0.010(2) 0.016(2)
C52 0.057(3) 0.063(3) 0.059(3) 0.013(2) 0.021(3) 0.022(2)
C53 0.049(2) 0.057(2) 0.066(3) 0.019(3) 0.021(2) 0.0216(17)
C54 0.0413(16) 0.0514(17) 0.065(3) 0.017(2) 0.015(2) 0.0132(13)
C55 0.0379(15) 0.0413(16) 0.056(3) 0.012(2) 0.0094(16) 0.0107(12)
C56 0.0319(14) 0.0378(17) 0.0419(18) 0.0139(13) -0.0016(12) -0.0018(11)
C57 0.0345(14) 0.051(2) 0.067(2) 0.0290(17) 0.0069(14) 0.0031(13)
C58 0.0421(17) 0.059(2) 0.075(3) 0.0392(18) 0.0036(17) 0.0046(14)
C59 0.0509(18) 0.057(2) 0.054(2) 0.0305(17) -0.0043(14) -0.0097(16)
C60 0.0582(18) 0.0553(19) 0.0381(15) 0.0111(13) 0.0035(12) -0.0139(15)
C61 0.0491(17) 0.0429(17) 0.0359(14) 0.0095(12) 0.0055(12) -0.0078(12)
C62 0.0326(17) 0.0369(15) 0.026(2) 0.0051(13) 0.0084(15) 0.0049(13)
C63 0.0316(19) 0.038(2) 0.0367(19) 0.0051(17) 0.0084(18) -0.0035(16)
C64 0.033(2) 0.041(2) 0.045(3) 0.0032(19) 0.0080(19) -0.0001(17)
C65 0.031(2) 0.047(3) 0.046(3) 0.0044(17) 0.0064(18) 0.0037(19)
C66 0.033(3) 0.0384(17) 0.041(3) 0.0083(16) 0.0091(19) 0.0077(19)
C67 0.030(3) 0.0378(15) 0.033(3) 0.0030(14) 0.009(2) 0.0019(16)
C44' 0.0326(7) 0.0303(7) 0.0264(6) 0.0032(5) 0.0008(5) -0.0018(6)
C45' 0.039(3) 0.029(3) 0.036(3) 0.013(3) -0.004(3) -0.005(3)
C46' 0.034(3) 0.032(3) 0.038(4) 0.009(3) 0.002(3) -0.002(3)
C47' 0.031(3) 0.030(3) 0.036(3) 0.009(2) -0.001(2) 0.003(2)
C48' 0.032(4) 0.031(4) 0.030(3) 0.002(3) 0.004(3) -0.003(3)
C49' 0.032(3) 0.031(3) 0.025(3) 0.004(3) -0.002(3) 0.002(2)
C50' 0.033(3) 0.037(3) 0.050(4) 0.012(3) 0.005(3) 0.005(3)
C51' 0.047(4) 0.045(3) 0.045(4) 0.011(4) 0.009(3) 0.016(3)
C52' 0.050(4) 0.052(4) 0.058(5) 0.007(4) 0.004(3) 0.018(3)
C53' 0.054(4) 0.056(3) 0.056(5) 0.013(4) 0.009(4) 0.014(3)
C54' 0.039(3) 0.052(3) 0.060(5) 0.013(5) 0.003(4) 0.018(2)
C55' 0.044(4) 0.045(3) 0.053(5) 0.014(4) 0.006(3) 0.010(3)
C56' 0.033(3) 0.036(3) 0.048(3) 0.016(3) 0.001(2) 0.000(2)
C57' 0.038(3) 0.044(3) 0.066(4) 0.028(3) 0.000(3) 0.003(2)
C58' 0.045(3) 0.059(4) 0.078(4) 0.030(3) 0.004(3) 0.003(3)
C59' 0.046(4) 0.061(4) 0.069(5) 0.037(3) -0.002(3) -0.001(3)
C60' 0.057(3) 0.056(4) 0.047(3) 0.027(3) 0.000(3) -0.009(3)
C61' 0.046(3) 0.047(3) 0.044(3) 0.015(3) 0.005(3) 0.000(3)
C62' 0.035(3) 0.035(3) 0.024(3) 0.004(3) 0.005(3) -0.007(3)
C63' 0.037(4) 0.039(4) 0.035(4) 0.002(4) 0.009(4) 0.006(4)
C64' 0.032(4) 0.047(4) 0.042(4) 0.002(4) 0.000(3) -0.004(3)
C65' 0.035(5) 0.041(4) 0.046(4) 0.004(3) 0.002(4) 0.006(3)
C66' 0.032(5) 0.048(3) 0.040(4) 0.000(3) 0.004(4) 0.002(3)
C67' 0.030(4) 0.038(3) 0.031(4) 0.007(3) 0.008(3) 0.007(3)
C68 0.0261(6) 0.0265(6) 0.0282(7) 0.0031(5) 0.0018(5) -0.0011(5)
C69 0.0267(7) 0.0301(7) 0.0332(7) 0.0036(5) 0.0034(6) 0.0022(5)
C70 0.0275(7) 0.0352(7) 0.0363(8) 0.0025(6) 0.0028(6) 0.0051(6)
C71 0.0276(7) 0.0344(7) 0.0345(7) 0.0018(6) 0.0002(6) 0.0023(6)
C72 0.0279(7) 0.0342(7) 0.0306(7) 0.0000(6) 0.0028(6) 0.0023(6)
C73 0.0259(6) 0.0289(7) 0.0309(7) 0.0034(5) 0.0033(5) 0.0008(5)
C74 0.0293(7) 0.0351(7) 0.0323(7) 0.0043(6) 0.0023(6) 0.0077(6)
C75 0.0329(7) 0.0357(8) 0.0395(8) 0.0033(6) 0.0069(6) 0.0068(6)
C76 0.0421(9) 0.0369(8) 0.0444(9) -0.0010(7) 0.0062(7) 0.0099(7)
C77 0.0480(9) 0.0466(9) 0.0418(9) 0.0031(7) 0.0128(7) 0.0184(8)
C78 0.0397(8) 0.0480(9) 0.0465(9) 0.0080(7) 0.0154(7) 0.0114(7)
C79 0.0321(7) 0.0389(8) 0.0405(8) 0.0027(6) 0.0067(6) 0.0059(6)
C80 0.020(4) 0.054(5) 0.025(4) -0.005(4) 0.014(4) 0.012(4)
C81 0.033(5) 0.064(5) 0.035(5) 0.002(5) 0.000(4) 0.016(4)
C82 0.046(5) 0.078(5) 0.044(5) -0.005(5) -0.004(5) 0.019(5)
C83 0.045(5) 0.084(5) 0.046(5) -0.012(5) -0.007(5) 0.019(5)
C84 0.035(5) 0.076(5) 0.046(5) -0.019(5) -0.003(5) 0.016(5)
C85 0.028(5) 0.062(5) 0.041(5) -0.010(5) 0.002(4) 0.014(4)
C80' 0.0278(8) 0.0481(10) 0.0349(9) -0.0022(8) 0.0011(7) 0.0088(7)
C81' 0.0400(10) 0.0581(11) 0.0358(10) -0.0005(8) 0.0009(8) 0.0171(9)
C82' 0.0469(11) 0.0855(15) 0.0413(11) 0.0024(10) -0.0027(9) 0.0302(11)
C83' 0.0387(11) 0.0976(17) 0.0394(11) -0.0135(11) -0.0096(9) 0.0216(11)
C84' 0.0352(11) 0.0797(15) 0.0511(12) -0.0261(11) -0.0053(9) 0.0138(10)
C85' 0.0315(10) 0.0550(11) 0.0481(11) -0.0138(9) -0.0029(8) 0.0098(8)
C86 0.0248(6) 0.0281(7) 0.0345(7) -0.0003(5) 0.0022(5) -0.0016(5)
C87 0.0301(7) 0.0339(7) 0.0396(8) 0.0035(6) 0.0075(6) 0.0022(6)
C88 0.0349(8) 0.0380(8) 0.0505(9) 0.0030(7) 0.0155(7) 0.0038(6)
C89 0.0300(7) 0.0393(8) 0.0558(10) -0.0014(7) 0.0071(7) 0.0052(6)
C90 0.0327(8) 0.0362(8) 0.0467(9) 0.0018(7) -0.0011(7) 0.0061(6)
C91 0.0305(7) 0.0319(7) 0.0351(7) 0.0001(6) 0.0012(6) 0.0020(6)
N1 0.0295(6) 0.0357(6) 0.0264(6) 0.0036(5) 0.0026(5) -0.0004(5)
N2 0.0285(6) 0.0334(6) 0.0233(5) 0.0025(4) 0.0030(5) 0.0011(5)
N3 0.0233(5) 0.0285(6) 0.0269(6) 0.0022(4) 0.0034(4) 0.0003(4)
N4 0.0274(6) 0.0310(6) 0.0265(6) 0.0035(4) 0.0030(5) 0.0016(5)
C1S 0.070(2) 0.065(2) 0.069(2) 0.0168(18) 0.0364(17) 0.0345(17)
C2S 0.062(2) 0.055(2) 0.065(2) 0.0060(17) 0.0212(17) 0.0186(18)
C3S 0.082(3) 0.0552(18) 0.074(2) 0.0139(16) 0.006(2) 0.0230(18)
C4S 0.106(3) 0.068(2) 0.088(3) 0.010(2) -0.009(3) 0.026(2)
C5S 0.102(3) 0.0541(19) 0.105(3) 0.001(2) 0.008(3) 0.016(2)
C6S 0.093(3) 0.060(2) 0.091(3) 0.018(2) 0.040(2) 0.028(2)
C1S' 0.077(4) 0.060(4) 0.076(4) 0.016(3) 0.035(3) 0.032(3)
C2S' 0.082(4) 0.063(4) 0.079(4) 0.015(4) 0.017(4) 0.020(4)
C3S' 0.100(5) 0.063(3) 0.082(4) -0.001(3) 0.013(4) 0.017(4)
C4S' 0.108(5) 0.072(4) 0.087(4) -0.002(3) 0.008(4) 0.021(4)
C5S' 0.108(5) 0.055(3) 0.092(4) -0.001(3) 0.027(4) 0.023(4)
C6S' 0.099(4) 0.055(4) 0.087(4) 0.012(3) 0.033(4) 0.032(4)
 
_geom_special_details
;
 All esds (except the esd in the dihedral angle between two l.s. planes)
 are estimated using the full covariance matrix.  The cell esds are taken
 into account individually in the estimation of esds in distances, angles
 and torsion angles; correlations between esds in cell parameters are only
 used when they are defined by crystal symmetry.  An approximate (isotropic)
 treatment of cell esds is used for estimating esds involving l.s. planes.
;
 
loop_
 _geom_bond_atom_site_label_1
 _geom_bond_atom_site_label_2
 _geom_bond_distance
 _geom_bond_site_symmetry_2
 _geom_bond_publ_flag
Mn1 O1 1.764(2) . ?
Mn1 N1 1.8958(13) . ?
Mn1 N4 1.9073(12) . ?
Mn1 N2 1.9088(12) . ?
Mn1 N3 1.9233(12) . ?
Mn1' O1' 1.701(5) . ?
Mn1' N1 1.8812(16) . ?
Mn1' N3 1.8874(15) . ?
Mn1' N4 1.8912(15) . ?
Mn1' N2 1.9164(15) . ?
C1 N1 1.3729(19) . ?
C1 C2 1.415(2) . ?
C1 C19 1.418(2) . ?
C2 C3 1.381(2) . ?
C2 H2 0.9500 . ?
C3 C4 1.423(2) . ?
C3 H3 0.9500 . ?
C4 N1 1.3805(18) . ?
C4 C5 1.392(2) . ?
C5 C6 1.401(2) . ?
C5 C20 1.4973(19) . ?
C6 N2 1.3911(18) . ?
C6 C7 1.427(2) . ?
C7 C8 1.353(2) . ?
C7 H7 0.9500 . ?
C8 C9 1.4292(19) . ?
C8 H8 0.9500 . ?
C9 N2 1.3866(19) . ?
C9 C10 1.391(2) . ?
C10 C11 1.4009(19) . ?
C10 C44' 1.497(2) . ?
C10 C44 1.497(2) . ?
C11 N3 1.3918(18) . ?
C11 C12 1.4263(19) . ?
C12 C13 1.361(2) . ?
C12 H12 0.9500 . ?
C13 C14 1.424(2) . ?
C13 H13 0.9500 . ?
C14 N3 1.3952(17) . ?
C14 C15 1.4066(19) . ?
C15 C16 1.384(2) . ?
C15 C68 1.5014(18) . ?
C16 N4 1.3822(17) . ?
C16 C17 1.429(2) . ?
C17 C18 1.377(2) . ?
C17 H17 0.9500 . ?
C18 C19 1.421(2) . ?
C18 H18 0.9500 . ?
C19 N4 1.3649(19) . ?
C20 C25 1.406(2) . ?
C20 C21 1.406(2) . ?
C21 C22 1.397(2) . ?
C21 C26 1.491(2) . ?
C22 C23 1.384(3) . ?
C22 H22 0.9500 . ?
C23 C24 1.388(3) . ?
C23 C32 1.489(2) . ?
C24 C25 1.399(2) . ?
C24 H24 0.9500 . ?
C25 C38 1.490(2) . ?
C26 C31 1.385(3) . ?
C26 C27 1.401(3) . ?
C27 C28 1.377(3) . ?
C27 H27 0.9500 . ?
C28 C29 1.371(4) . ?
C28 H28 0.9500 . ?
C29 C30 1.384(4) . ?
C29 H29 0.9500 . ?
C30 C31 1.388(3) . ?
C30 H30 0.9500 . ?
C31 H31 0.9500 . ?
C32 C37 1.390(3) . ?
C32 C33 1.391(3) . ?
C33 C34 1.392(3) . ?
C33 H33 0.9500 . ?
C34 C35 1.385(3) . ?
C34 H34 0.9500 . ?
C35 C36 1.378(3) . ?
C35 H35 0.9500 . ?
C36 C37 1.396(2) . ?
C36 H36 0.9500 . ?
C37 H37 0.9500 . ?
C38 C43 1.390(2) . ?
C38 C39 1.398(3) . ?
C39 C40 1.384(3) . ?
C39 H39 0.9500 . ?
C40 C41 1.381(4) . ?
C40 H40 0.9500 . ?
C41 C42 1.382(3) . ?
C41 H41 0.9500 . ?
C42 C43 1.386(3) . ?
C42 H42 0.9500 . ?
C43 H43 0.9500 . ?
C44 C45 1.403(5) . ?
C44 C49 1.422(5) . ?
C45 C46 1.393(6) . ?
C45 C50 1.488(6) . ?
C46 C47 1.397(5) . ?
C46 H46 0.9500 . ?
C47 C48 1.383(6) . ?
C47 C56 1.490(5) . ?
C48 C49 1.418(6) . ?
C48 H48 0.9500 . ?
C49 C62 1.486(6) . ?
C50 C55 1.395(6) . ?
C50 C51 1.399(6) . ?
C51 C52 1.392(6) . ?
C51 H51 0.9500 . ?
C52 C53 1.377(6) . ?
C52 H52 0.9500 . ?
C53 C54 1.392(5) . ?
C53 H53 0.9500 . ?
C54 C55 1.395(6) . ?
C54 H54 0.9500 . ?
C55 H55 0.9500 . ?
C56 C61 1.390(5) . ?
C56 C57 1.397(5) . ?
C57 C58 1.383(5) . ?
C57 H57 0.9500 . ?
C58 C59 1.379(7) . ?
C58 H58 0.9500 . ?
C59 C60 1.393(6) . ?
C59 H59 0.9500 . ?
C60 C61 1.402(4) . ?
C60 H60 0.9500 . ?
C61 H61 0.9500 . ?
C62 C67 1.400(6) . ?
C62 C63 1.411(6) . ?
C63 C64 1.387(6) . ?
C63 H63 0.9500 . ?
C64 C65 1.386(6) . ?
C64 H64 0.9500 . ?
C65 C66 1.396(5) . ?
C65 H65 0.9500 . ?
C66 C67 1.380(6) . ?
C66 H66 0.9500 . ?
C67 H67 0.9500 . ?
C44' C49' 1.397(12) . ?
C44' C45' 1.438(12) . ?
C45' C46' 1.417(13) . ?
C45' C50' 1.482(12) . ?
C46' C47' 1.377(11) . ?
C46' H46' 0.9500 . ?
C47' C48' 1.377(11) . ?
C47' C56' 1.497(10) . ?
C48' C49' 1.394(12) . ?
C48' H48' 0.9500 . ?
C49' C62' 1.470(12) . ?
C50' C51' 1.379(13) . ?
C50' C55' 1.411(13) . ?
C51' C52' 1.379(13) . ?
C51' H51' 0.9500 . ?
C52' C53' 1.365(12) . ?
C52' H52' 0.9500 . ?
C53' C54' 1.378(11) . ?
C53' H53' 0.9500 . ?
C54' C55' 1.413(13) . ?
C54' H54' 0.9500 . ?
C55' H55' 0.9500 . ?
C56' C61' 1.371(11) . ?
C56' C57' 1.388(11) . ?
C57' C58' 1.392(10) . ?
C57' H57' 0.9500 . ?
C58' C59' 1.399(13) . ?
C58' H58' 0.9500 . ?
C59' C60' 1.353(14) . ?
C59' H59' 0.9500 . ?
C60' C61' 1.423(11) . ?
C60' H60' 0.9500 . ?
C61' H61' 0.9500 . ?
C62' C63' 1.391(13) . ?
C62' C67' 1.413(13) . ?
C63' C64' 1.399(13) . ?
C63' H63' 0.9500 . ?
C64' C65' 1.385(13) . ?
C64' H64' 0.9500 . ?
C65' C66' 1.383(11) . ?
C65' H65' 0.9500 . ?
C66' C67' 1.359(13) . ?
C66' H66' 0.9500 . ?
C67' H67' 0.9500 . ?
C68 C73 1.405(2) . ?
C68 C69 1.406(2) . ?
C69 C70 1.404(2) . ?
C69 C74 1.491(2) . ?
C70 C71 1.385(2) . ?
C70 H70 0.9500 . ?
C71 C72 1.395(2) . ?
C71 C80' 1.489(2) . ?
C71 C80 1.491(9) . ?
C72 C73 1.400(2) . ?
C72 H72 0.9500 . ?
C73 C86 1.485(2) . ?
C74 C79 1.393(2) . ?
C74 C75 1.399(2) . ?
C75 C76 1.385(2) . ?
C75 H75 0.9500 . ?
C76 C77 1.385(3) . ?
C76 H76 0.9500 . ?
C77 C78 1.384(2) . ?
C77 H77 0.9500 . ?
C78 C79 1.387(2) . ?
C78 H78 0.9500 . ?
C79 H79 0.9500 . ?
C80 C81 1.385(17) . ?
C80 C85 1.388(18) . ?
C81 C82 1.395(17) . ?
C81 H81 0.9500 . ?
C82 C83 1.371(18) . ?
C82 H82 0.9500 . ?
C83 C84 1.390(18) . ?
C83 H83 0.9500 . ?
C84 C85 1.389(18) . ?
C84 H84 0.9500 . ?
C85 H85 0.9500 . ?
C80' C81' 1.387(3) . ?
C80' C85' 1.394(3) . ?
C81' C82' 1.393(3) . ?
C81' H81' 0.9500 . ?
C82' C83' 1.373(3) . ?
C82' H82' 0.9500 . ?
C83' C84' 1.379(4) . ?
C83' H83' 0.9500 . ?
C84' C85' 1.387(3) . ?
C84' H84' 0.9500 . ?
C85' H85' 0.9500 . ?
C86 C91 1.398(2) . ?
C86 C87 1.400(2) . ?
C87 C88 1.385(2) . ?
C87 H87 0.9500 . ?
C88 C89 1.386(3) . ?
C88 H88 0.9500 . ?
C89 C90 1.388(3) . ?
C89 H89 0.9500 . ?
C90 C91 1.387(2) . ?
C90 H90 0.9500 . ?
C91 H91 0.9500 . ?
C1S C6S 1.375(5) . ?
C1S C2S 1.376(5) . ?
C1S H1S 0.9500 . ?
C2S C3S 1.390(5) . ?
C2S H2S 0.9500 . ?
C3S C4S 1.382(5) . ?
C3S H3S 0.9500 . ?
C4S C5S 1.388(6) . ?
C4S H4S 0.9500 . ?
C5S C6S 1.375(6) . ?
C5S H5S 0.9500 . ?
C6S H6S 0.9500 . ?
C1S' C6S' 1.375(8) . ?
C1S' C2S' 1.375(8) . ?
C1S' H1S' 0.9500 . ?
C2S' C3S' 1.391(8) . ?
C2S' H2S' 0.9500 . ?
C3S' C4S' 1.377(8) . ?
C3S' H3S' 0.9500 . ?
C4S' C5S' 1.378(9) . ?
C4S' H4S' 0.9500 . ?
C5S' C6S' 1.371(8) . ?
C5S' H5S' 0.9500 . ?
C6S' H6S' 0.9500 . ?
 
loop_
 _geom_angle_atom_site_label_1
 _geom_angle_atom_site_label_2
 _geom_angle_atom_site_label_3
 _geom_angle
 _geom_angle_site_symmetry_1
 _geom_angle_site_symmetry_3
 _geom_angle_publ_flag
O1 Mn1 N1 104.28(7) . . ?
O1 Mn1 N4 104.44(7) . . ?
N1 Mn1 N4 78.94(5) . . ?
O1 Mn1 N2 102.57(7) . . ?
N1 Mn1 N2 87.88(5) . . ?
N4 Mn1 N2 152.12(7) . . ?
O1 Mn1 N3 105.55(7) . . ?
N1 Mn1 N3 149.34(7) . . ?
N4 Mn1 N3 86.89(5) . . ?
N2 Mn1 N3 92.48(5) . . ?
O1' Mn1' N1 99.63(17) . . ?
O1' Mn1' N3 104.11(17) . . ?
N1 Mn1' N3 155.55(14) . . ?
O1' Mn1' N4 105.30(18) . . ?
N1 Mn1' N4 79.71(7) . . ?
N3 Mn1' N4 88.39(7) . . ?
O1' Mn1' N2 100.21(18) . . ?
N1 Mn1' N2 88.08(7) . . ?
N3 Mn1' N2 93.37(7) . . ?
N4 Mn1' N2 153.18(14) . . ?
N1 C1 C2 108.60(13) . . ?
N1 C1 C19 111.26(13) . . ?
C2 C1 C19 140.14(14) . . ?
C3 C2 C1 107.26(14) . . ?
C3 C2 H2 126.4 . . ?
C1 C2 H2 126.4 . . ?
C2 C3 C4 107.85(13) . . ?
C2 C3 H3 126.1 . . ?
C4 C3 H3 126.1 . . ?
N1 C4 C5 120.16(14) . . ?
N1 C4 C3 107.62(13) . . ?
C5 C4 C3 132.22(14) . . ?
C4 C5 C6 122.34(13) . . ?
C4 C5 C20 120.82(13) . . ?
C6 C5 C20 116.83(13) . . ?
N2 C6 C5 125.47(13) . . ?
N2 C6 C7 108.41(13) . . ?
C5 C6 C7 126.12(13) . . ?
C8 C7 C6 108.14(13) . . ?
C8 C7 H7 125.9 . . ?
C6 C7 H7 125.9 . . ?
C7 C8 C9 107.77(13) . . ?
C7 C8 H8 126.1 . . ?
C9 C8 H8 126.1 . . ?
N2 C9 C10 124.20(12) . . ?
N2 C9 C8 108.64(12) . . ?
C10 C9 C8 127.14(14) . . ?
C9 C10 C11 123.95(13) . . ?
C9 C10 C44' 119.64(12) . . ?
C11 C10 C44' 116.38(13) . . ?
C9 C10 C44 119.64(12) . . ?
C11 C10 C44 116.38(13) . . ?
N3 C11 C10 124.19(13) . . ?
N3 C11 C12 108.89(12) . . ?
C10 C11 C12 126.89(13) . . ?
C13 C12 C11 107.63(13) . . ?
C13 C12 H12 126.2 . . ?
C11 C12 H12 126.2 . . ?
C12 C13 C14 108.13(12) . . ?
C12 C13 H13 125.9 . . ?
C14 C13 H13 125.9 . . ?
N3 C14 C15 125.12(13) . . ?
N3 C14 C13 108.63(12) . . ?
C15 C14 C13 126.20(13) . . ?
C16 C15 C14 122.16(13) . . ?
C16 C15 C68 121.16(12) . . ?
C14 C15 C68 116.64(12) . . ?
N4 C16 C15 120.46(12) . . ?
N4 C16 C17 107.11(12) . . ?
C15 C16 C17 132.35(13) . . ?
C18 C17 C16 108.05(13) . . ?
C18 C17 H17 126.0 . . ?
C16 C17 H17 126.0 . . ?
C17 C18 C19 107.11(13) . . ?
C17 C18 H18 126.4 . . ?
C19 C18 H18 126.4 . . ?
N4 C19 C1 111.55(13) . . ?
N4 C19 C18 108.60(13) . . ?
C1 C19 C18 139.84(14) . . ?
C25 C20 C21 120.00(14) . . ?
C25 C20 C5 120.64(15) . . ?
C21 C20 C5 119.17(14) . . ?
C22 C21 C20 119.18(16) . . ?
C22 C21 C26 119.31(16) . . ?
C20 C21 C26 121.48(14) . . ?
C23 C22 C21 121.62(17) . . ?
C23 C22 H22 119.2 . . ?
C21 C22 H22 119.2 . . ?
C22 C23 C24 118.57(15) . . ?
C22 C23 C32 121.23(17) . . ?
C24 C23 C32 120.17(17) . . ?
C23 C24 C25 121.88(16) . . ?
C23 C24 H24 119.1 . . ?
C25 C24 H24 119.1 . . ?
C24 C25 C20 118.72(16) . . ?
C24 C25 C38 118.99(15) . . ?
C20 C25 C38 122.23(14) . . ?
C31 C26 C27 119.06(19) . . ?
C31 C26 C21 120.20(17) . . ?
C27 C26 C21 120.74(18) . . ?
C28 C27 C26 120.3(2) . . ?
C28 C27 H27 119.8 . . ?
C26 C27 H27 119.8 . . ?
C29 C28 C27 120.3(2) . . ?
C29 C28 H28 119.8 . . ?
C27 C28 H28 119.8 . . ?
C28 C29 C30 120.1(2) . . ?
C28 C29 H29 120.0 . . ?
C30 C29 H29 120.0 . . ?
C29 C30 C31 120.2(3) . . ?
C29 C30 H30 119.9 . . ?
C31 C30 H30 119.9 . . ?
C26 C31 C30 120.0(2) . . ?
C26 C31 H31 120.0 . . ?
C30 C31 H31 120.0 . . ?
C37 C32 C33 119.19(17) . . ?
C37 C32 C23 121.16(17) . . ?
C33 C32 C23 119.63(17) . . ?
C32 C33 C34 120.5(2) . . ?
C32 C33 H33 119.8 . . ?
C34 C33 H33 119.8 . . ?
C35 C34 C33 119.8(2) . . ?
C35 C34 H34 120.1 . . ?
C33 C34 H34 120.1 . . ?
C36 C35 C34 120.11(18) . . ?
C36 C35 H35 119.9 . . ?
C34 C35 H35 119.9 . . ?
C35 C36 C37 120.25(19) . . ?
C35 C36 H36 119.9 . . ?
C37 C36 H36 119.9 . . ?
C32 C37 C36 120.11(19) . . ?
C32 C37 H37 119.9 . . ?
C36 C37 H37 119.9 . . ?
C43 C38 C39 118.22(18) . . ?
C43 C38 C25 121.75(16) . . ?
C39 C38 C25 120.03(16) . . ?
C40 C39 C38 120.6(2) . . ?
C40 C39 H39 119.7 . . ?
C38 C39 H39 119.7 . . ?
C41 C40 C39 120.4(2) . . ?
C41 C40 H40 119.8 . . ?
C39 C40 H40 119.8 . . ?
C40 C41 C42 119.7(2) . . ?
C40 C41 H41 120.2 . . ?
C42 C41 H41 120.2 . . ?
C41 C42 C43 120.1(2) . . ?
C41 C42 H42 119.9 . . ?
C43 C42 H42 119.9 . . ?
C42 C43 C38 120.99(18) . . ?
C42 C43 H43 119.5 . . ?
C38 C43 H43 119.5 . . ?
C45 C44 C49 119.4(4) . . ?
C45 C44 C10 120.0(3) . . ?
C49 C44 C10 120.5(3) . . ?
C46 C45 C44 119.1(4) . . ?
C46 C45 C50 119.8(5) . . ?
C44 C45 C50 121.1(5) . . ?
C45 C46 C47 122.3(5) . . ?
C45 C46 H46 118.9 . . ?
C47 C46 H46 118.9 . . ?
C48 C47 C46 118.6(4) . . ?
C48 C47 C56 122.1(4) . . ?
C46 C47 C56 119.3(4) . . ?
C47 C48 C49 121.0(5) . . ?
C47 C48 H48 119.5 . . ?
C49 C48 H48 119.5 . . ?
C48 C49 C44 119.1(5) . . ?
C48 C49 C62 115.4(5) . . ?
C44 C49 C62 125.4(6) . . ?
C55 C50 C51 117.9(5) . . ?
C55 C50 C45 120.1(5) . . ?
C51 C50 C45 121.9(6) . . ?
C52 C51 C50 121.4(6) . . ?
C52 C51 H51 119.3 . . ?
C50 C51 H51 119.3 . . ?
C53 C52 C51 120.1(5) . . ?
C53 C52 H52 119.9 . . ?
C51 C52 H52 119.9 . . ?
C52 C53 C54 119.4(5) . . ?
C52 C53 H53 120.3 . . ?
C54 C53 H53 120.3 . . ?
C53 C54 C55 120.5(5) . . ?
C53 C54 H54 119.7 . . ?
C55 C54 H54 119.7 . . ?
C54 C55 C50 120.6(5) . . ?
C54 C55 H55 119.7 . . ?
C50 C55 H55 119.7 . . ?
C61 C56 C57 118.4(3) . . ?
C61 C56 C47 121.0(3) . . ?
C57 C56 C47 120.6(4) . . ?
C58 C57 C56 121.7(4) . . ?
C58 C57 H57 119.1 . . ?
C56 C57 H57 119.1 . . ?
C59 C58 C57 119.7(4) . . ?
C59 C58 H58 120.2 . . ?
C57 C58 H58 120.2 . . ?
C58 C59 C60 119.9(3) . . ?
C58 C59 H59 120.0 . . ?
C60 C59 H59 120.0 . . ?
C59 C60 C61 120.2(4) . . ?
C59 C60 H60 119.9 . . ?
C61 C60 H60 119.9 . . ?
C56 C61 C60 120.2(4) . . ?
C56 C61 H61 119.9 . . ?
C60 C61 H61 119.9 . . ?
C67 C62 C63 118.5(5) . . ?
C67 C62 C49 123.8(6) . . ?
C63 C62 C49 117.6(6) . . ?
C64 C63 C62 120.4(6) . . ?
C64 C63 H63 119.8 . . ?
C62 C63 H63 119.8 . . ?
C65 C64 C63 120.1(5) . . ?
C65 C64 H64 120.0 . . ?
C63 C64 H64 120.0 . . ?
C64 C65 C66 120.0(5) . . ?
C64 C65 H65 120.0 . . ?
C66 C65 H65 120.0 . . ?
C67 C66 C65 120.1(5) . . ?
C67 C66 H66 120.0 . . ?
C65 C66 H66 120.0 . . ?
C66 C67 C62 120.8(5) . . ?
C66 C67 H67 119.6 . . ?
C62 C67 H67 119.6 . . ?
C49' C44' C45' 118.6(8) . . ?
C49' C44' C10 128.0(6) . . ?
C45' C44' C10 113.4(6) . . ?
C46' C45' C44' 120.3(10) . . ?
C46' C45' C50' 113.3(13) . . ?
C44' C45' C50' 125.9(13) . . ?
C47' C46' C45' 119.8(11) . . ?
C47' C46' H46' 120.1 . . ?
C45' C46' H46' 120.1 . . ?
C48' C47' C46' 118.6(10) . . ?
C48' C47' C56' 120.2(9) . . ?
C46' C47' C56' 121.2(9) . . ?
C47' C48' C49' 124.0(11) . . ?
C47' C48' H48' 118.0 . . ?
C49' C48' H48' 118.0 . . ?
C48' C49' C44' 118.2(11) . . ?
C48' C49' C62' 124.5(13) . . ?
C44' C49' C62' 117.2(13) . . ?
C51' C50' C55' 119.6(12) . . ?
C51' C50' C45' 118.3(14) . . ?
C55' C50' C45' 121.7(13) . . ?
C50' C51' C52' 119.2(13) . . ?
C50' C51' H51' 120.4 . . ?
C52' C51' H51' 120.4 . . ?
C53' C52' C51' 121.9(12) . . ?
C53' C52' H52' 119.1 . . ?
C51' C52' H52' 119.1 . . ?
C52' C53' C54' 120.7(13) . . ?
C52' C53' H53' 119.7 . . ?
C54' C53' H53' 119.7 . . ?
C53' C54' C55' 118.5(11) . . ?
C53' C54' H54' 120.8 . . ?
C55' C54' H54' 120.8 . . ?
C50' C55' C54' 119.9(11) . . ?
C50' C55' H55' 120.1 . . ?
C54' C55' H55' 120.1 . . ?
C61' C56' C57' 120.4(8) . . ?
C61' C56' C47' 119.8(8) . . ?
C57' C56' C47' 119.8(8) . . ?
C56' C57' C58' 121.5(9) . . ?
C56' C57' H57' 119.2 . . ?
C58' C57' H57' 119.2 . . ?
C57' C58' C59' 117.8(9) . . ?
C57' C58' H58' 121.1 . . ?
C59' C58' H58' 121.1 . . ?
C60' C59' C58' 120.8(9) . . ?
C60' C59' H59' 119.6 . . ?
C58' C59' H59' 119.6 . . ?
C59' C60' C61' 121.3(9) . . ?
C59' C60' H60' 119.3 . . ?
C61' C60' H60' 119.3 . . ?
C56' C61' C60' 118.1(9) . . ?
C56' C61' H61' 121.0 . . ?
C60' C61' H61' 121.0 . . ?
C63' C62' C67' 116.3(12) . . ?
C63' C62' C49' 120.4(14) . . ?
C67' C62' C49' 123.0(13) . . ?
C62' C63' C64' 122.5(14) . . ?
C62' C63' H63' 118.7 . . ?
C64' C63' H63' 118.7 . . ?
C65' C64' C63' 119.3(13) . . ?
C65' C64' H64' 120.3 . . ?
C63' C64' H64' 120.3 . . ?
C66' C65' C64' 118.2(13) . . ?
C66' C65' H65' 120.9 . . ?
C64' C65' H65' 120.9 . . ?
C67' C66' C65' 122.7(14) . . ?
C67' C66' H66' 118.6 . . ?
C65' C66' H66' 118.6 . . ?
C66' C67' C62' 120.6(13) . . ?
C66' C67' H67' 119.7 . . ?
C62' C67' H67' 119.7 . . ?
C73 C68 C69 119.38(13) . . ?
C73 C68 C15 120.39(13) . . ?
C69 C68 C15 120.06(13) . . ?
C70 C69 C68 119.32(14) . . ?
C70 C69 C74 117.63(14) . . ?
C68 C69 C74 123.05(13) . . ?
C71 C70 C69 121.94(14) . . ?
C71 C70 H70 119.0 . . ?
C69 C70 H70 119.0 . . ?
C70 C71 C72 118.04(14) . . ?
C70 C71 C80' 123.90(15) . . ?
C72 C71 C80' 117.97(14) . . ?
C70 C71 C80 113.5(9) . . ?
C72 C71 C80 128.4(9) . . ?
C71 C72 C73 121.78(14) . . ?
C71 C72 H72 119.1 . . ?
C73 C72 H72 119.1 . . ?
C72 C73 C68 119.47(14) . . ?
C72 C73 C86 116.46(13) . . ?
C68 C73 C86 124.07(13) . . ?
C79 C74 C75 118.08(15) . . ?
C79 C74 C69 118.97(13) . . ?
C75 C74 C69 122.93(14) . . ?
C76 C75 C74 120.54(15) . . ?
C76 C75 H75 119.7 . . ?
C74 C75 H75 119.7 . . ?
C77 C76 C75 120.70(15) . . ?
C77 C76 H76 119.7 . . ?
C75 C76 H76 119.7 . . ?
C78 C77 C76 119.37(16) . . ?
C78 C77 H77 120.3 . . ?
C76 C77 H77 120.3 . . ?
C77 C78 C79 120.08(16) . . ?
C77 C78 H78 120.0 . . ?
C79 C78 H78 120.0 . . ?
C78 C79 C74 121.23(15) . . ?
C78 C79 H79 119.4 . . ?
C74 C79 H79 119.4 . . ?
C81 C80 C85 120.6(15) . . ?
C81 C80 C71 121.9(17) . . ?
C85 C80 C71 117.5(19) . . ?
C80 C81 C82 119.6(18) . . ?
C80 C81 H81 120.2 . . ?
C82 C81 H81 120.2 . . ?
C83 C82 C81 119(2) . . ?
C83 C82 H82 120.3 . . ?
C81 C82 H82 120.3 . . ?
C82 C83 C84 121.8(19) . . ?
C82 C83 H83 119.1 . . ?
C84 C83 H83 119.1 . . ?
C85 C84 C83 119(2) . . ?
C85 C84 H84 120.6 . . ?
C83 C84 H84 120.6 . . ?
C80 C85 C84 120(2) . . ?
C80 C85 H85 120.0 . . ?
C84 C85 H85 120.0 . . ?
C81' C80' C85' 118.74(18) . . ?
C81' C80' C71 120.21(19) . . ?
C85' C80' C71 121.0(2) . . ?
C80' C81' C82' 120.2(2) . . ?
C80' C81' H81' 119.9 . . ?
C82' C81' H81' 119.9 . . ?
C83' C82' C81' 120.5(2) . . ?
C83' C82' H82' 119.8 . . ?
C81' C82' H82' 119.8 . . ?
C82' C83' C84' 119.83(19) . . ?
C82' C83' H83' 120.1 . . ?
C84' C83' H83' 120.1 . . ?
C83' C84' C85' 120.2(2) . . ?
C83' C84' H84' 119.9 . . ?
C85' C84' H84' 119.9 . . ?
C84' C85' C80' 120.5(2) . . ?
C84' C85' H85' 119.7 . . ?
C80' C85' H85' 119.7 . . ?
C91 C86 C87 118.51(15) . . ?
C91 C86 C73 121.88(14) . . ?
C87 C86 C73 119.26(14) . . ?
C88 C87 C86 121.12(16) . . ?
C88 C87 H87 119.4 . . ?
C86 C87 H87 119.4 . . ?
C87 C88 C89 119.67(16) . . ?
C87 C88 H88 120.2 . . ?
C89 C88 H88 120.2 . . ?
C88 C89 C90 119.98(16) . . ?
C88 C89 H89 120.0 . . ?
C90 C89 H89 120.0 . . ?
C91 C90 C89 120.43(16) . . ?
C91 C90 H90 119.8 . . ?
C89 C90 H90 119.8 . . ?
C90 C91 C86 120.27(16) . . ?
C90 C91 H91 119.9 . . ?
C86 C91 H91 119.9 . . ?
C1 N1 C4 108.66(12) . . ?
C1 N1 Mn1' 116.51(10) . . ?
C4 N1 Mn1' 132.19(11) . . ?
C1 N1 Mn1 117.26(10) . . ?
C4 N1 Mn1 132.15(11) . . ?
C9 N2 C6 107.02(12) . . ?
C9 N2 Mn1 124.11(10) . . ?
C6 N2 Mn1 125.97(10) . . ?
C9 N2 Mn1' 125.01(10) . . ?
C6 N2 Mn1' 126.33(11) . . ?
C11 N3 C14 106.70(11) . . ?
C11 N3 Mn1' 124.46(10) . . ?
C14 N3 Mn1' 126.35(10) . . ?
C11 N3 Mn1 124.27(9) . . ?
C14 N3 Mn1 127.02(10) . . ?
C19 N4 C16 109.12(12) . . ?
C19 N4 Mn1' 116.61(10) . . ?
C16 N4 Mn1' 132.54(10) . . ?
C19 N4 Mn1 116.77(9) . . ?
C16 N4 Mn1 131.33(10) . . ?
C6S C1S C2S 118.7(5) . . ?
C6S C1S H1S 120.6 . . ?
C2S C1S H1S 120.6 . . ?
C1S C2S C3S 120.6(4) . . ?
C1S C2S H2S 119.7 . . ?
C3S C2S H2S 119.7 . . ?
C4S C3S C2S 120.1(4) . . ?
C4S C3S H3S 120.0 . . ?
C2S C3S H3S 120.0 . . ?
C3S C4S C5S 119.3(4) . . ?
C3S C4S H4S 120.3 . . ?
C5S C4S H4S 120.3 . . ?
C6S C5S C4S 119.6(4) . . ?
C6S C5S H5S 120.2 . . ?
C4S C5S H5S 120.2 . . ?
C5S C6S C1S 121.6(5) . . ?
C5S C6S H6S 119.2 . . ?
C1S C6S H6S 119.2 . . ?
C6S' C1S' C2S' 118.8(9) . . ?
C6S' C1S' H1S' 120.6 . . ?
C2S' C1S' H1S' 120.6 . . ?
C1S' C2S' C3S' 121.7(9) . . ?
C1S' C2S' H2S' 119.2 . . ?
C3S' C2S' H2S' 119.2 . . ?
C4S' C3S' C2S' 118.2(9) . . ?
C4S' C3S' H3S' 120.9 . . ?
C2S' C3S' H3S' 120.9 . . ?
C3S' C4S' C5S' 119.7(8) . . ?
C3S' C4S' H4S' 120.1 . . ?
C5S' C4S' H4S' 120.1 . . ?
C6S' C5S' C4S' 121.0(9) . . ?
C6S' C5S' H5S' 119.5 . . ?
C4S' C5S' H5S' 119.5 . . ?
C5S' C6S' C1S' 119.8(9) . . ?
C5S' C6S' H6S' 120.1 . . ?
C1S' C6S' H6S' 120.1 . . ?
 
loop_
 _geom_torsion_atom_site_label_1
 _geom_torsion_atom_site_label_2
 _geom_torsion_atom_site_label_3
 _geom_torsion_atom_site_label_4
 _geom_torsion
 _geom_torsion_site_symmetry_1
 _geom_torsion_site_symmetry_2
 _geom_torsion_site_symmetry_3
 _geom_torsion_site_symmetry_4
 _geom_torsion_publ_flag
N1 C1 C2 C3 0.0(2) . . . . ?
C19 C1 C2 C3 179.7(2) . . . . ?
C1 C2 C3 C4 -0.2(2) . . . . ?
C2 C3 C4 N1 0.4(2) . . . . ?
C2 C3 C4 C5 -179.68(18) . . . . ?
N1 C4 C5 C6 1.1(3) . . . . ?
C3 C4 C5 C6 -178.87(17) . . . . ?
N1 C4 C5 C20 179.85(15) . . . . ?
C3 C4 C5 C20 -0.1(3) . . . . ?
C4 C5 C6 N2 1.1(3) . . . . ?
C20 C5 C6 N2 -177.77(15) . . . . ?
C4 C5 C6 C7 179.84(16) . . . . ?
C20 C5 C6 C7 1.0(3) . . . . ?
N2 C6 C7 C8 -1.5(2) . . . . ?
C5 C6 C7 C8 179.60(16) . . . . ?
C6 C7 C8 C9 1.6(2) . . . . ?
C7 C8 C9 N2 -1.18(19) . . . . ?
C7 C8 C9 C10 177.16(16) . . . . ?
N2 C9 C10 C11 1.4(3) . . . . ?
C8 C9 C10 C11 -176.72(16) . . . . ?
N2 C9 C10 C44' -176.45(14) . . . . ?
C8 C9 C10 C44' 5.4(3) . . . . ?
N2 C9 C10 C44 -176.45(14) . . . . ?
C8 C9 C10 C44 5.4(3) . . . . ?
C9 C10 C11 N3 -5.9(2) . . . . ?
C44' C10 C11 N3 172.00(14) . . . . ?
C44 C10 C11 N3 172.00(14) . . . . ?
C9 C10 C11 C12 176.46(15) . . . . ?
C44' C10 C11 C12 -5.6(2) . . . . ?
C44 C10 C11 C12 -5.6(2) . . . . ?
N3 C11 C12 C13 -1.44(18) . . . . ?
C10 C11 C12 C13 176.50(15) . . . . ?
C11 C12 C13 C14 0.50(18) . . . . ?
C12 C13 C14 N3 0.60(18) . . . . ?
C12 C13 C14 C15 -176.96(15) . . . . ?
N3 C14 C15 C16 4.5(2) . . . . ?
C13 C14 C15 C16 -178.31(15) . . . . ?
N3 C14 C15 C68 -173.05(13) . . . . ?
C13 C14 C15 C68 4.1(2) . . . . ?
C14 C15 C16 N4 0.7(2) . . . . ?
C68 C15 C16 N4 178.11(13) . . . . ?
C14 C15 C16 C17 177.06(16) . . . . ?
C68 C15 C16 C17 -5.5(3) . . . . ?
N4 C16 C17 C18 1.22(18) . . . . ?
C15 C16 C17 C18 -175.54(16) . . . . ?
C16 C17 C18 C19 -0.82(19) . . . . ?
N1 C1 C19 N4 -1.9(2) . . . . ?
C2 C1 C19 N4 178.4(2) . . . . ?
N1 C1 C19 C18 176.6(2) . . . . ?
C2 C1 C19 C18 -3.1(4) . . . . ?
C17 C18 C19 N4 0.11(19) . . . . ?
C17 C18 C19 C1 -178.4(2) . . . . ?
C4 C5 C20 C25 113.15(18) . . . . ?
C6 C5 C20 C25 -68.0(2) . . . . ?
C4 C5 C20 C21 -71.9(2) . . . . ?
C6 C5 C20 C21 106.98(18) . . . . ?
C25 C20 C21 C22 0.6(2) . . . . ?
C5 C20 C21 C22 -174.38(15) . . . . ?
C25 C20 C21 C26 178.57(15) . . . . ?
C5 C20 C21 C26 3.6(2) . . . . ?
C20 C21 C22 C23 1.0(3) . . . . ?
C26 C21 C22 C23 -176.98(16) . . . . ?
C21 C22 C23 C24 -2.2(3) . . . . ?
C21 C22 C23 C32 175.60(17) . . . . ?
C22 C23 C24 C25 1.8(3) . . . . ?
C32 C23 C24 C25 -176.02(16) . . . . ?
C23 C24 C25 C20 -0.2(2) . . . . ?
C23 C24 C25 C38 177.10(15) . . . . ?
C21 C20 C25 C24 -1.0(2) . . . . ?
C5 C20 C25 C24 173.92(14) . . . . ?
C21 C20 C25 C38 -178.23(14) . . . . ?
C5 C20 C25 C38 -3.3(2) . . . . ?
C22 C21 C26 C31 -63.4(2) . . . . ?
C20 C21 C26 C31 118.68(19) . . . . ?
C22 C21 C26 C27 117.22(19) . . . . ?
C20 C21 C26 C27 -60.7(2) . . . . ?
C31 C26 C27 C28 -1.2(3) . . . . ?
C21 C26 C27 C28 178.24(16) . . . . ?
C26 C27 C28 C29 -0.3(3) . . . . ?
C27 C28 C29 C30 1.3(3) . . . . ?
C28 C29 C30 C31 -0.8(3) . . . . ?
C27 C26 C31 C30 1.7(3) . . . . ?
C21 C26 C31 C30 -177.74(17) . . . . ?
C29 C30 C31 C26 -0.7(3) . . . . ?
C22 C23 C32 C37 138.8(2) . . . . ?
C24 C23 C32 C37 -43.4(3) . . . . ?
C22 C23 C32 C33 -42.9(3) . . . . ?
C24 C23 C32 C33 134.9(2) . . . . ?
C37 C32 C33 C34 1.1(4) . . . . ?
C23 C32 C33 C34 -177.3(3) . . . . ?
C32 C33 C34 C35 -0.3(5) . . . . ?
C33 C34 C35 C36 -0.7(5) . . . . ?
C34 C35 C36 C37 0.9(4) . . . . ?
C33 C32 C37 C36 -0.8(4) . . . . ?
C23 C32 C37 C36 177.5(2) . . . . ?
C35 C36 C37 C32 -0.2(4) . . . . ?
C24 C25 C38 C43 132.67(17) . . . . ?
C20 C25 C38 C43 -50.1(2) . . . . ?
C24 C25 C38 C39 -47.4(2) . . . . ?
C20 C25 C38 C39 129.79(17) . . . . ?
C43 C38 C39 C40 1.4(3) . . . . ?
C25 C38 C39 C40 -178.47(19) . . . . ?
C38 C39 C40 C41 0.3(4) . . . . ?
C39 C40 C41 C42 -1.8(4) . . . . ?
C40 C41 C42 C43 1.7(4) . . . . ?
C41 C42 C43 C38 0.1(3) . . . . ?
C39 C38 C43 C42 -1.6(3) . . . . ?
C25 C38 C43 C42 178.30(16) . . . . ?
C9 C10 C44 C45 116.1(6) . . . . ?
C11 C10 C44 C45 -61.9(6) . . . . ?
C9 C10 C44 C49 -67.5(6) . . . . ?
C11 C10 C44 C49 114.5(6) . . . . ?
C49 C44 C45 C46 -7.4(12) . . . . ?
C10 C44 C45 C46 169.1(6) . . . . ?
C49 C44 C45 C50 174.0(9) . . . . ?
C10 C44 C45 C50 -9.6(11) . . . . ?
C44 C45 C46 C47 4.4(12) . . . . ?
C50 C45 C46 C47 -176.9(7) . . . . ?
C45 C46 C47 C48 1.2(8) . . . . ?
C45 C46 C47 C56 -176.2(7) . . . . ?
C46 C47 C48 C49 -3.7(8) . . . . ?
C56 C47 C48 C49 173.6(7) . . . . ?
C47 C48 C49 C44 0.7(12) . . . . ?
C47 C48 C49 C62 178.4(7) . . . . ?
C45 C44 C49 C48 4.9(13) . . . . ?
C10 C44 C49 C48 -171.6(6) . . . . ?
C45 C44 C49 C62 -172.5(9) . . . . ?
C10 C44 C49 C62 11.0(12) . . . . ?
C46 C45 C50 C55 -45.6(14) . . . . ?
C44 C45 C50 C55 133.1(10) . . . . ?
C46 C45 C50 C51 131.9(12) . . . . ?
C44 C45 C50 C51 -49.5(15) . . . . ?
C55 C50 C51 C52 0.4(18) . . . . ?
C45 C50 C51 C52 -177.1(11) . . . . ?
C50 C51 C52 C53 1.9(17) . . . . ?
C51 C52 C53 C54 -2.6(11) . . . . ?
C52 C53 C54 C55 1.2(10) . . . . ?
C53 C54 C55 C50 1.2(12) . . . . ?
C51 C50 C55 C54 -1.9(15) . . . . ?
C45 C50 C55 C54 175.6(9) . . . . ?
C48 C47 C56 C61 -35.4(6) . . . . ?
C46 C47 C56 C61 141.9(4) . . . . ?
C48 C47 C56 C57 145.5(4) . . . . ?
C46 C47 C56 C57 -37.2(5) . . . . ?
C61 C56 C57 C58 -0.8(5) . . . . ?
C47 C56 C57 C58 178.4(4) . . . . ?
C56 C57 C58 C59 -0.2(5) . . . . ?
C57 C58 C59 C60 0.6(5) . . . . ?
C58 C59 C60 C61 -0.1(5) . . . . ?
C57 C56 C61 C60 1.3(5) . . . . ?
C47 C56 C61 C60 -177.8(3) . . . . ?
C59 C60 C61 C56 -0.9(5) . . . . ?
C48 C49 C62 C67 129.8(10) . . . . ?
C44 C49 C62 C67 -52.7(15) . . . . ?
C48 C49 C62 C63 -47.4(15) . . . . ?
C44 C49 C62 C63 130.1(13) . . . . ?
C67 C62 C63 C64 4(2) . . . . ?
C49 C62 C63 C64 -178.9(12) . . . . ?
C62 C63 C64 C65 -2(2) . . . . ?
C63 C64 C65 C66 0.1(15) . . . . ?
C64 C65 C66 C67 0.7(11) . . . . ?
C65 C66 C67 C62 0.7(12) . . . . ?
C63 C62 C67 C66 -2.9(16) . . . . ?
C49 C62 C67 C66 179.9(9) . . . . ?
C9 C10 C44' C49' -65.5(16) . . . . ?
C11 C10 C44' C49' 116.6(16) . . . . ?
C9 C10 C44' C45' 113.1(13) . . . . ?
C11 C10 C44' C45' -64.9(13) . . . . ?
C49' C44' C45' C46' -3(3) . . . . ?
C10 C44' C45' C46' 178.4(16) . . . . ?
C49' C44' C45' C50' 168(2) . . . . ?
C10 C44' C45' C50' -11(3) . . . . ?
C44' C45' C46' C47' -3(3) . . . . ?
C50' C45' C46' C47' -175.0(15) . . . . ?
C45' C46' C47' C48' 8(2) . . . . ?
C45' C46' C47' C56' -172.9(16) . . . . ?
C46' C47' C48' C49' -8(2) . . . . ?
C56' C47' C48' C49' 173.3(17) . . . . ?
C47' C48' C49' C44' 2(3) . . . . ?
C47' C48' C49' C62' -179(2) . . . . ?
C45' C44' C49' C48' 4(3) . . . . ?
C10 C44' C49' C48' -177.9(12) . . . . ?
C45' C44' C49' C62' -176(2) . . . . ?
C10 C44' C49' C62' 3(3) . . . . ?
C46' C45' C50' C51' 121(3) . . . . ?
C44' C45' C50' C51' -50(4) . . . . ?
C46' C45' C50' C55' -51(3) . . . . ?
C44' C45' C50' C55' 137(3) . . . . ?
C55' C50' C51' C52' 0(4) . . . . ?
C45' C50' C51' C52' -172(2) . . . . ?
C50' C51' C52' C53' -5(4) . . . . ?
C51' C52' C53' C54' 5(3) . . . . ?
C52' C53' C54' C55' 0(2) . . . . ?
C51' C50' C55' C54' 4(4) . . . . ?
C45' C50' C55' C54' 176(2) . . . . ?
C53' C54' C55' C50' -4(3) . . . . ?
C48' C47' C56' C61' -41.4(14) . . . . ?
C46' C47' C56' C61' 139.8(10) . . . . ?
C48' C47' C56' C57' 140.8(11) . . . . ?
C46' C47' C56' C57' -38.1(14) . . . . ?
C61' C56' C57' C58' -0.2(13) . . . . ?
C47' C56' C57' C58' 177.6(8) . . . . ?
C56' C57' C58' C59' -1.4(12) . . . . ?
C57' C58' C59' C60' 2.8(13) . . . . ?
C58' C59' C60' C61' -2.4(13) . . . . ?
C57' C56' C61' C60' 0.6(12) . . . . ?
C47' C56' C61' C60' -177.2(8) . . . . ?
C59' C60' C61' C56' 0.7(12) . . . . ?
C48' C49' C62' C63' -49(4) . . . . ?
C44' C49' C62' C63' 130(3) . . . . ?
C48' C49' C62' C67' 137(3) . . . . ?
C44' C49' C62' C67' -44(4) . . . . ?
C67' C62' C63' C64' -6(5) . . . . ?
C49' C62' C63' C64' 180(3) . . . . ?
C62' C63' C64' C65' 5(5) . . . . ?
C63' C64' C65' C66' -2(4) . . . . ?
C64' C65' C66' C67' 1(3) . . . . ?
C65' C66' C67' C62' -2(3) . . . . ?
C63' C62' C67' C66' 5(4) . . . . ?
C49' C62' C67' C66' 179(2) . . . . ?
C16 C15 C68 C73 107.58(17) . . . . ?
C14 C15 C68 C73 -74.83(18) . . . . ?
C16 C15 C68 C69 -77.20(19) . . . . ?
C14 C15 C68 C69 100.39(16) . . . . ?
C73 C68 C69 C70 2.9(2) . . . . ?
C15 C68 C69 C70 -172.32(13) . . . . ?
C73 C68 C69 C74 -176.47(13) . . . . ?
C15 C68 C69 C74 8.3(2) . . . . ?
C68 C69 C70 C71 -1.3(2) . . . . ?
C74 C69 C70 C71 178.16(14) . . . . ?
C69 C70 C71 C72 -0.8(2) . . . . ?
C69 C70 C71 C80' 175.63(14) . . . . ?
C69 C70 C71 C80 179.2(7) . . . . ?
C70 C71 C72 C73 1.2(2) . . . . ?
C80' C71 C72 C73 -175.41(14) . . . . ?
C80 C71 C72 C73 -178.7(8) . . . . ?
C71 C72 C73 C68 0.4(2) . . . . ?
C71 C72 C73 C86 -179.70(14) . . . . ?
C69 C68 C73 C72 -2.5(2) . . . . ?
C15 C68 C73 C72 172.73(13) . . . . ?
C69 C68 C73 C86 177.61(13) . . . . ?
C15 C68 C73 C86 -7.1(2) . . . . ?
C70 C69 C74 C79 -50.2(2) . . . . ?
C68 C69 C74 C79 129.22(16) . . . . ?
C70 C69 C74 C75 128.01(16) . . . . ?
C68 C69 C74 C75 -52.6(2) . . . . ?
C79 C74 C75 C76 -0.2(2) . . . . ?
C69 C74 C75 C76 -178.44(15) . . . . ?
C74 C75 C76 C77 0.4(3) . . . . ?
C75 C76 C77 C78 0.1(3) . . . . ?
C76 C77 C78 C79 -0.9(3) . . . . ?
C77 C78 C79 C74 1.0(3) . . . . ?
C75 C74 C79 C78 -0.5(2) . . . . ?
C69 C74 C79 C78 177.79(15) . . . . ?
C70 C71 C80 C81 -32.3(11) . . . . ?
C72 C71 C80 C81 147.7(12) . . . . ?
C70 C71 C80 C85 147.7(11) . . . . ?
C72 C71 C80 C85 -32.3(12) . . . . ?
C85 C80 C81 C82 0.0(2) . . . . ?
C71 C80 C81 C82 179.99(14) . . . . ?
C80 C81 C82 C83 0.0(3) . . . . ?
C81 C82 C83 C84 0.0(4) . . . . ?
C82 C83 C84 C85 0.0(5) . . . . ?
C81 C80 C85 C84 -0.1(3) . . . . ?
C71 C80 C85 C84 180.0(2) . . . . ?
C83 C84 C85 C80 0.1(4) . . . . ?
C70 C71 C80' C81' -38.09(16) . . . . ?
C72 C71 C80' C81' 138.35(15) . . . . ?
C70 C71 C80' C85' 141.63(17) . . . . ?
C72 C71 C80' C85' -41.93(16) . . . . ?
C85' C80' C81' C82' 0.72(16) . . . . ?
C71 C80' C81' C82' -179.55(11) . . . . ?
C80' C81' C82' C83' -0.3(2) . . . . ?
C81' C82' C83' C84' -0.1(3) . . . . ?
C82' C83' C84' C85' 0.1(3) . . . . ?
C83' C84' C85' C80' 0.3(3) . . . . ?
C81' C80' C85' C84' -0.7(2) . . . . ?
C71 C80' C85' C84' 179.58(14) . . . . ?
C72 C73 C86 C91 127.67(15) . . . . ?
C68 C73 C86 C91 -52.5(2) . . . . ?
C72 C73 C86 C87 -45.42(19) . . . . ?
C68 C73 C86 C87 134.45(15) . . . . ?
C91 C86 C87 C88 -0.7(2) . . . . ?
C73 C86 C87 C88 172.67(13) . . . . ?
C86 C87 C88 C89 -0.4(2) . . . . ?
C87 C88 C89 C90 1.3(2) . . . . ?
C88 C89 C90 C91 -1.1(2) . . . . ?
C89 C90 C91 C86 0.1(2) . . . . ?
C87 C86 C91 C90 0.8(2) . . . . ?
C73 C86 C91 C90 -172.33(13) . . . . ?
C2 C1 N1 C4 0.25(19) . . . . ?
C19 C1 N1 C4 -179.53(14) . . . . ?
C2 C1 N1 Mn1' -163.61(14) . . . . ?
C19 C1 N1 Mn1' 16.6(2) . . . . ?
C2 C1 N1 Mn1 166.38(12) . . . . ?
C19 C1 N1 Mn1 -13.41(18) . . . . ?
C5 C4 N1 C1 179.67(15) . . . . ?
C3 C4 N1 C1 -0.39(18) . . . . ?
C5 C4 N1 Mn1' -19.9(3) . . . . ?
C3 C4 N1 Mn1' 160.00(15) . . . . ?
C5 C4 N1 Mn1 16.4(2) . . . . ?
C3 C4 N1 Mn1 -163.68(12) . . . . ?
O1' Mn1' N1 C1 85.1(2) . . . . ?
N3 Mn1' N1 C1 -81.0(2) . . . . ?
N4 Mn1' N1 C1 -18.89(15) . . . . ?
N2 Mn1' N1 C1 -174.89(13) . . . . ?
O1' Mn1' N1 C4 -74.1(2) . . . . ?
N3 Mn1' N1 C4 119.8(2) . . . . ?
N4 Mn1' N1 C4 -178.07(16) . . . . ?
N2 Mn1' N1 C4 25.9(2) . . . . ?
O1 Mn1 N1 C1 -84.79(13) . . . . ?
N4 Mn1 N1 C1 17.48(12) . . . . ?
N2 Mn1 N1 C1 172.78(12) . . . . ?
N3 Mn1 N1 C1 81.50(16) . . . . ?
O1 Mn1 N1 C4 77.37(16) . . . . ?
N4 Mn1 N1 C4 179.63(16) . . . . ?
N2 Mn1 N1 C4 -25.06(15) . . . . ?
N3 Mn1 N1 C4 -116.35(15) . . . . ?
C10 C9 N2 C6 -178.13(15) . . . . ?
C8 C9 N2 C6 0.27(17) . . . . ?
C10 C9 N2 Mn1 20.2(2) . . . . ?
C8 C9 N2 Mn1 -161.43(11) . . . . ?
C10 C9 N2 Mn1' -12.0(2) . . . . ?
C8 C9 N2 Mn1' 166.43(13) . . . . ?
C5 C6 N2 C9 179.65(15) . . . . ?
C7 C6 N2 C9 0.69(18) . . . . ?
C5 C6 N2 Mn1 -19.1(2) . . . . ?
C7 C6 N2 Mn1 161.95(12) . . . . ?
C5 C6 N2 Mn1' 13.7(2) . . . . ?
C7 C6 N2 Mn1' -165.23(14) . . . . ?
C10 C11 N3 C14 -176.22(14) . . . . ?
C12 C11 N3 C14 1.78(16) . . . . ?
C10 C11 N3 Mn1' 20.8(2) . . . . ?
C12 C11 N3 Mn1' -161.24(13) . . . . ?
C10 C11 N3 Mn1 -11.4(2) . . . . ?
C12 C11 N3 Mn1 166.58(10) . . . . ?
C15 C14 N3 C11 176.12(14) . . . . ?
C13 C14 N3 C11 -1.47(16) . . . . ?
C15 C14 N3 Mn1' -21.3(2) . . . . ?
C13 C14 N3 Mn1' 161.13(13) . . . . ?
C15 C14 N3 Mn1 11.9(2) . . . . ?
C13 C14 N3 Mn1 -165.72(10) . . . . ?
O1' Mn1' N3 C11 77.9(2) . . . . ?
N1 Mn1' N3 C11 -116.25(19) . . . . ?
N4 Mn1' N3 C11 -176.69(12) . . . . ?
N2 Mn1' N3 C11 -23.48(17) . . . . ?
O1' Mn1' N3 C14 -81.7(2) . . . . ?
N1 Mn1' N3 C14 84.1(2) . . . . ?
N4 Mn1' N3 C14 23.63(17) . . . . ?
N2 Mn1' N3 C14 176.84(12) . . . . ?
C1 C19 N4 C16 179.63(13) . . . . ?
C18 C19 N4 C16 0.66(18) . . . . ?
C1 C19 N4 Mn1' -13.45(19) . . . . ?
C18 C19 N4 Mn1' 167.58(13) . . . . ?
C1 C19 N4 Mn1 16.34(18) . . . . ?
C18 C19 N4 Mn1 -162.62(11) . . . . ?
C15 C16 N4 C19 176.07(14) . . . . ?
C17 C16 N4 C19 -1.15(17) . . . . ?
C15 C16 N4 Mn1' 12.0(2) . . . . ?
C17 C16 N4 Mn1' -165.22(14) . . . . ?
C15 C16 N4 Mn1 -23.9(2) . . . . ?
C17 C16 N4 Mn1 158.85(11) . . . . ?
O1' Mn1' N4 C19 -79.51(19) . . . . ?
N1 Mn1' N4 C19 17.77(14) . . . . ?
N3 Mn1' N4 C19 176.31(12) . . . . ?
N2 Mn1' N4 C19 82.0(2) . . . . ?
O1' Mn1' N4 C16 83.6(2) . . . . ?
N1 Mn1' N4 C16 -179.10(15) . . . . ?
N3 Mn1' N4 C16 -20.56(19) . . . . ?
N2 Mn1' N4 C16 -114.86(18) . . . . ?
C6S C1S C2S C3S -0.01(15) . . . . ?
C1S C2S C3S C4S 0.11(14) . . . . ?
C2S C3S C4S C5S -0.3(3) . . . . ?
C3S C4S C5S C6S 0.5(4) . . . . ?
C4S C5S C6S C1S -0.4(4) . . . . ?
C2S C1S C6S C5S 0.1(3) . . . . ?
C6S' C1S' C2S' C3S' 2(2) . . . . ?
C1S' C2S' C3S' C4S' 6(2) . . . . ?
C2S' C3S' C4S' C5S' -9(2) . . . . ?
C3S' C4S' C5S' C6S' 4(2) . . . . ?
C4S' C5S' C6S' C1S' 4(2) . . . . ?
C2S' C1S' C6S' C5S' -7(2) . . . . ?
 
_refine_diff_density_max    0.387
_refine_diff_density_min   -0.477
_refine_diff_density_rms    0.036

_shelx_res_file
;

    xs1131a.res created by SHELXL-2014/7


TITL   xs1131a
CELL   1.54178    14.2994  16.0576  21.1400  95.3261  105.4473  110.6070
ZERR         2     0.0003   0.0003   0.0003   0.0013    0.0015    0.0016
LATT  1
SFAC C H N O MN
UNIT 194 130 8 2 2

TEMP -163

ACTA
HTAB
BOND
BOND $H
CONF
WPDB

L.S. 6
FMAP 2
PLAN 10
OMIT -2 143.8
OMIT 0 0 3
OMIT 1 0 2

ABIN

WGHT    0.067400    0.841000
EXTI    0.000377
FVAR       3.26771   0.72695   0.69791   0.06842   0.68728
PART 1
MN1   5    0.207705    0.131370    0.790772    21.00000    0.02708    0.02987 =
         0.02332    0.00338    0.00178   -0.00199
O1    4    0.275755    0.071284    0.762075    21.00000    0.03015    0.04119 =
         0.04556    0.01509    0.00136   -0.00119

PART 2
rem SAME MN1 > O1
MN1'  5    0.173911    0.160975    0.804925   -21.00000    0.03174    0.03414 =
         0.02543    0.00558   -0.00009   -0.00140
O1'   4    0.099815    0.214046    0.827100   -21.00000    0.03743    0.06251 =
         0.03683    0.00987    0.01069    0.01648

PART 0
C1    1    0.221814    0.259007    0.708034    11.00000    0.03280    0.03629 =
         0.02992    0.00597    0.00711    0.00212
C2    1    0.178879    0.271507    0.642867    11.00000    0.04040    0.04114 =
         0.03160    0.00938    0.00612    0.00342
AFIX  43
H2    2    0.208779    0.321763    0.623932    11.00000   -1.20000
AFIX   0
C3    1    0.085466    0.197092    0.611925    11.00000    0.03789    0.04461 =
         0.02745    0.00735    0.00289    0.00505
AFIX  43
H3    2    0.039252    0.187002    0.567761    11.00000   -1.20000
AFIX   0
C4    1    0.070697    0.138182    0.657937    11.00000    0.03050    0.04099 =
         0.02376    0.00213    0.00252    0.00412
C5    1   -0.008601    0.054675    0.653067    11.00000    0.02969    0.04094 =
         0.02391    0.00204    0.00218    0.00332
C6    1   -0.007625    0.008729    0.706285    11.00000    0.02760    0.03966 =
         0.02440   -0.00082    0.00152    0.00033
C7    1   -0.085400   -0.076672    0.705789    11.00000    0.03145    0.04048 =
         0.02681   -0.00057    0.00276   -0.00470
AFIX  43
H7    2   -0.147271   -0.112247    0.669323    11.00000   -1.20000
AFIX   0
C8    1   -0.055751   -0.098202    0.766258    11.00000    0.03378    0.03426 =
         0.02968    0.00123    0.00593   -0.00362
AFIX  43
H8    2   -0.092152   -0.152124    0.779411    11.00000   -1.20000
AFIX   0
C9    1    0.040132   -0.025319    0.806820    11.00000    0.02832    0.03071 =
         0.02835    0.00283    0.00577    0.00001
C10   1    0.095882   -0.017423    0.873491    11.00000    0.02846    0.03012 =
         0.02816    0.00408    0.00607    0.00205
C11   1    0.186902    0.058381    0.911160    11.00000    0.02775    0.02961 =
         0.02727    0.00435    0.00544    0.00267
C12   1    0.244593    0.073041    0.980398    11.00000    0.03181    0.03364 =
         0.02786    0.00641    0.00589    0.00324
AFIX  43
H12   2    0.226248    0.034355    1.010352    11.00000   -1.20000
AFIX   0
C13   1    0.330679    0.152475    0.995793    11.00000    0.02826    0.03272 =
         0.02551    0.00284    0.00201    0.00168
AFIX  43
H13   2    0.383406    0.178815    1.038430    11.00000   -1.20000
AFIX   0
C14   1    0.327977    0.189226    0.936904    11.00000    0.02349    0.03070 =
         0.02629    0.00090    0.00143    0.00284
C15   1    0.405029    0.268654    0.930620    11.00000    0.02446    0.02942 =
         0.02906    0.00132    0.00302    0.00355
C16   1    0.394374    0.300584    0.871602    11.00000    0.02496    0.02776 =
         0.02916   -0.00062    0.00204    0.00120
C17   1    0.458321    0.379831    0.854093    11.00000    0.02944    0.03128 =
         0.03316    0.00288    0.00439   -0.00069
AFIX  43
H17   2    0.524950    0.423565    0.882074    11.00000   -1.20000
AFIX   0
C18   1    0.406471    0.381735    0.789545    11.00000    0.03593    0.03426 =
         0.03472    0.00847    0.00712    0.00068
AFIX  43
H18   2    0.430181    0.427137    0.765110    11.00000   -1.20000
AFIX   0
C19   1    0.310858    0.303021    0.766385    11.00000    0.03267    0.03361 =
         0.02887    0.00580    0.00650    0.00366
C20   1   -0.100850    0.010556    0.590197    11.00000    0.03077    0.04343 =
         0.02359    0.00356    0.00309    0.00042
C21   1   -0.177695    0.047612    0.574051    11.00000    0.03235    0.05070 =
         0.02867    0.00090    0.00358    0.00361
C22   1   -0.268381    0.001976    0.518663    11.00000    0.03346    0.05865 =
         0.03244    0.00124    0.00260    0.00888
AFIX  43
H22   2   -0.319792    0.027506    0.507313    11.00000   -1.20000
AFIX   0
C23   1   -0.285144   -0.079510    0.479930    11.00000    0.03279    0.05781 =
         0.02829   -0.00100    0.00178    0.00324
C24   1   -0.207695   -0.114439    0.495693    11.00000    0.03748    0.04543 =
         0.02808   -0.00063    0.00323    0.00031
AFIX  43
H24   2   -0.217725   -0.169434    0.468555    11.00000   -1.20000
AFIX   0
C25   1   -0.115276   -0.070952    0.550415    11.00000    0.03428    0.04271 =
         0.02562    0.00396    0.00439    0.00175
C26   1   -0.166244    0.132768    0.615988    11.00000    0.02806    0.05770 =
         0.04023   -0.00569    0.00233    0.00639
C27   1   -0.159937    0.137545    0.683598    11.00000    0.03452    0.07232 =
         0.04075   -0.00861    0.00354    0.01377
AFIX  43
H27   2   -0.164955    0.085539    0.702749    11.00000   -1.20000
AFIX   0
C28   1   -0.146503    0.217220    0.722424    11.00000    0.03747    0.08734 =
         0.05207   -0.02375    0.00344    0.01333
AFIX  43
H28   2   -0.142646    0.219829    0.768171    11.00000   -1.20000
AFIX   0
C29   1   -0.138665    0.292797    0.695401    11.00000    0.04067    0.06940 =
         0.08379   -0.03141    0.00444    0.00765
AFIX  43
H29   2   -0.127960    0.347943    0.722659    11.00000   -1.20000
AFIX   0
C30   1   -0.146334    0.288847    0.628426    11.00000    0.05076    0.05342 =
         0.08562   -0.00823    0.00869    0.00752
AFIX  43
H30   2   -0.141747    0.341111    0.609681    11.00000   -1.20000
AFIX   0
C31   1   -0.160710    0.208732    0.588571    11.00000    0.04215    0.05381 =
         0.05834   -0.00270    0.00830    0.00771
AFIX  43
H31   2   -0.166748    0.206023    0.542503    11.00000   -1.20000
AFIX   0
C32   1   -0.385353   -0.130942    0.424002    11.00000    0.03524    0.06443 =
         0.03416   -0.00392   -0.00207    0.00534
C33   1   -0.481046   -0.139983    0.433079    11.00000    0.03632    0.12124 =
         0.04577   -0.02527    0.00064    0.00608
AFIX  43
H33   2   -0.481720   -0.111096    0.474166    11.00000   -1.20000
AFIX   0
C34   1   -0.575818   -0.191046    0.382401    11.00000    0.03452    0.12455 =
         0.05699   -0.02071   -0.00166    0.00510
AFIX  43
H34   2   -0.640915   -0.197235    0.389004    11.00000   -1.20000
AFIX   0
C35   1   -0.574967   -0.232789    0.322352    11.00000    0.04264    0.07527 =
         0.04504   -0.00925   -0.01140    0.00346
AFIX  43
H35   2   -0.639591   -0.268189    0.287893    11.00000   -1.20000
AFIX   0
C36   1   -0.480544   -0.223073    0.312489    11.00000    0.05240    0.06770 =
         0.03658   -0.01045   -0.00791    0.01686
AFIX  43
H36   2   -0.480237   -0.251073    0.270976    11.00000   -1.20000
AFIX   0
C37   1   -0.385360   -0.172254    0.363251    11.00000    0.04356    0.06288 =
         0.03526   -0.00472   -0.00263    0.01494
AFIX  43
H37   2   -0.320462   -0.165891    0.356265    11.00000   -1.20000
AFIX   0
C38   1   -0.037902   -0.114579    0.566336    11.00000    0.04404    0.04451 =
         0.02580    0.00472    0.00582    0.00775
C39   1   -0.072475   -0.206871    0.568757    11.00000    0.05544    0.04641 =
         0.05011    0.00962    0.01176    0.00792
AFIX  43
H39   2   -0.145609   -0.241848    0.559138    11.00000   -1.20000
AFIX   0
C40   1   -0.001146   -0.247748    0.585036    11.00000    0.08227    0.05490 =
         0.08351    0.02218    0.02593    0.02707
AFIX  43
H40   2   -0.025646   -0.310566    0.586336    11.00000   -1.20000
AFIX   0
C41   1    0.105484   -0.197687    0.599405    11.00000    0.07502    0.08052 =
         0.08945    0.02883    0.02661    0.04255
AFIX  43
H41   2    0.154447   -0.225498    0.611825    11.00000   -1.20000
AFIX   0
C42   1    0.140556   -0.106949    0.595619    11.00000    0.04962    0.07179 =
         0.05899    0.01355    0.01465    0.02219
AFIX  43
H42   2    0.213623   -0.072676    0.604306    11.00000   -1.20000
AFIX   0
C43   1    0.069345   -0.065869    0.579176    11.00000    0.04216    0.05137 =
         0.03649    0.00676    0.00937    0.01104
AFIX  43
H43   2    0.094195   -0.003473    0.576641    11.00000   -1.20000
AFIX   0

rem constraints
EADP C44 C44'
EXYZ C44 C44'

rem restraints
SADI 0.01 C10 C44 C10 C44'
SIMU 0.01 C44 > C67'

PART 1
C44   1    0.060977   -0.094482    0.908047    31.00000    0.03262    0.03033 =
         0.02643    0.00321    0.00076   -0.00178
C45   1    0.126982   -0.140155    0.930519    31.00000    0.03097    0.03273 =
         0.03710    0.00525    0.00241   -0.00136
C46   1    0.101850   -0.200751    0.972316    31.00000    0.03378    0.03453 =
         0.03781    0.00819    0.00214    0.00388
AFIX  43
H46   2    0.149331   -0.228272    0.989983    31.00000   -1.20000
AFIX   0
C47   1    0.009237   -0.222473    0.989166    31.00000    0.02984    0.03335 =
         0.03461    0.00748    0.00240   -0.00117
C48   1   -0.060488   -0.183461    0.962326    31.00000    0.03187    0.02939 =
         0.02879    0.00501    0.00422    0.00082
AFIX  43
H48   2   -0.125661   -0.200351    0.971231    31.00000   -1.20000
AFIX   0
C49   1   -0.036228   -0.118668    0.921736    31.00000    0.03364    0.02655 =
         0.02670    0.00331    0.00288   -0.00556
C50   1    0.224096   -0.123319    0.911581    31.00000    0.04067    0.03047 =
         0.04680    0.00929    0.00874    0.00691
C51   1    0.222952   -0.125346    0.845061    31.00000    0.04806    0.04815 =
         0.05342    0.00919    0.00952    0.01633
AFIX  43
H51   2    0.159137   -0.134994    0.811124    31.00000   -1.20000
AFIX   0
C52   1    0.313290   -0.113533    0.827533    31.00000    0.05735    0.06343 =
         0.05885    0.01275    0.02094    0.02243
AFIX  43
H52   2    0.311156   -0.113362    0.782245    31.00000   -1.20000
AFIX   0
C53   1    0.405731   -0.102094    0.875712    31.00000    0.04915    0.05686 =
         0.06603    0.01913    0.02060    0.02163
AFIX  43
H53   2    0.466700   -0.096573    0.863586    31.00000   -1.20000
AFIX   0
C54   1    0.409071   -0.098691    0.942363    31.00000    0.04126    0.05137 =
         0.06498    0.01738    0.01501    0.01325
AFIX  43
H54   2    0.473023   -0.089691    0.975907    31.00000   -1.20000
AFIX   0
C55   1    0.319249   -0.108390    0.960291    31.00000    0.03787    0.04130 =
         0.05597    0.01218    0.00940    0.01069
AFIX  43
H55   2    0.322905   -0.104799    1.006052    31.00000   -1.20000
AFIX   0
C56   1   -0.009225   -0.283381    1.037546    31.00000    0.03186    0.03778 =
         0.04188    0.01391   -0.00159   -0.00176
C57   1    0.021815   -0.356714    1.037207    31.00000    0.03453    0.05098 =
         0.06732    0.02904    0.00687    0.00308
AFIX  43
H57   2    0.053301   -0.368303    1.004915    31.00000   -1.20000
AFIX   0
C58   1    0.007898   -0.412878    1.082664    31.00000    0.04206    0.05856 =
         0.07533    0.03916    0.00361    0.00458
AFIX  43
H58   2    0.029430   -0.462461    1.081339    31.00000   -1.20000
AFIX   0
C59   1   -0.037385   -0.396549    1.129916    31.00000    0.05089    0.05702 =
         0.05397    0.03054   -0.00431   -0.00972
AFIX  43
H59   2   -0.046490   -0.434530    1.161555    31.00000   -1.20000
AFIX   0
C60   1   -0.069763   -0.324293    1.131201    31.00000    0.05816    0.05527 =
         0.03811    0.01113    0.00348   -0.01394
AFIX  43
H60   2   -0.101041   -0.313082    1.163719    31.00000   -1.20000
AFIX   0
C61   1   -0.056301   -0.268088    1.084628    31.00000    0.04914    0.04294 =
         0.03590    0.00953    0.00553   -0.00776
AFIX  43
H61   2   -0.079412   -0.219413    1.085242    31.00000   -1.20000
AFIX   0
C62   1   -0.119334   -0.084139    0.894630    31.00000    0.03257    0.03692 =
         0.02599    0.00509    0.00836    0.00490
C63   1   -0.223816   -0.148586    0.864767    31.00000    0.03159    0.03758 =
         0.03667    0.00508    0.00835   -0.00348
AFIX  43
H63   2   -0.238895   -0.211400    0.863331    31.00000   -1.20000
AFIX   0
C64   1   -0.304681   -0.120820    0.837484    31.00000    0.03272    0.04053 =
         0.04547    0.00322    0.00797   -0.00009
AFIX  43
H64   2   -0.374404   -0.164745    0.815920    31.00000   -1.20000
AFIX   0
C65   1   -0.283850   -0.029022    0.841656    31.00000    0.03101    0.04650 =
         0.04561    0.00442    0.00636    0.00374
AFIX  43
H65   2   -0.339335   -0.010089    0.823037    31.00000   -1.20000
AFIX   0
C66   1   -0.181390    0.035613    0.873198    31.00000    0.03297    0.03838 =
         0.04100    0.00829    0.00905    0.00767
AFIX  43
H66   2   -0.167381    0.098521    0.876478    31.00000   -1.20000
AFIX   0
C67   1   -0.100464    0.008255    0.899610    31.00000    0.03018    0.03781 =
         0.03341    0.00299    0.00888    0.00187
AFIX  43
H67   2   -0.031095    0.052657    0.921441    31.00000   -1.20000
AFIX   0

PART 2
SAME C44 > C67
C44'  1    0.060977   -0.094482    0.908047   -31.00000    0.03262    0.03033 =
         0.02643    0.00321    0.00076   -0.00178
C45'  1    0.134776   -0.137243    0.925043   -31.00000    0.03946    0.02924 =
         0.03605    0.01301   -0.00426   -0.00451
C46'  1    0.114415   -0.209888    0.959508   -31.00000    0.03391    0.03245 =
         0.03771    0.00920    0.00207   -0.00209
AFIX  43
H46'  2    0.161499   -0.240031    0.968700   -31.00000   -1.20000
AFIX   0
C47'  1    0.026143   -0.236665    0.979643   -31.00000    0.03143    0.02981 =
         0.03550    0.00920   -0.00064    0.00288
C48'  1   -0.047321   -0.199747    0.958135   -31.00000    0.03231    0.03139 =
         0.02985    0.00199    0.00433   -0.00303
AFIX  43
H48'  2   -0.111947   -0.224084    0.967450   -31.00000   -1.20000
AFIX   0
C49'  1   -0.032705   -0.128841    0.923521   -31.00000    0.03236    0.03094 =
         0.02474    0.00391   -0.00208    0.00201
C50'  1    0.227305   -0.121877    0.901694   -31.00000    0.03311    0.03694 =
         0.04995    0.01182    0.00502    0.00467
C51'  1    0.212413   -0.127994    0.833976   -31.00000    0.04728    0.04461 =
         0.04509    0.01052    0.00910    0.01553
AFIX  43
H51'  2    0.146515   -0.134298    0.804008   -31.00000   -1.20000
AFIX   0
C52'  1    0.294356   -0.124848    0.810278   -31.00000    0.05028    0.05166 =
         0.05756    0.00708    0.00399    0.01803
AFIX  43
H52'  2    0.282306   -0.133870    0.763275   -31.00000   -1.20000
AFIX   0
C53'  1    0.392294   -0.109138    0.852440   -31.00000    0.05387    0.05649 =
         0.05577    0.01264    0.00921    0.01350
AFIX  43
H53'  2    0.448325   -0.102763    0.834701   -31.00000   -1.20000
AFIX   0
C54'  1    0.410681   -0.102439    0.920465   -31.00000    0.03868    0.05194 =
         0.05971    0.01341    0.00344    0.01813
AFIX  43
H54'  2    0.478715   -0.091756    0.949848   -31.00000   -1.20000
AFIX   0
C55'  1    0.326009   -0.111826    0.945519   -31.00000    0.04408    0.04503 =
         0.05270    0.01432    0.00632    0.01013
AFIX  43
H55'  2    0.335517   -0.111370    0.991791   -31.00000   -1.20000
AFIX   0
C56'  1    0.008567   -0.305654    1.022911   -31.00000    0.03286    0.03565 =
         0.04803    0.01564    0.00083    0.00038
C57'  1    0.036106   -0.379316    1.012784   -31.00000    0.03806    0.04448 =
         0.06604    0.02770    0.00017    0.00322
AFIX  43
H57'  2    0.063469   -0.386360    0.977239   -31.00000   -1.20000
AFIX   0
C58'  1    0.024575   -0.443144    1.053494   -31.00000    0.04534    0.05887 =
         0.07815    0.02962    0.00397    0.00330
AFIX  43
H58'  2    0.042085   -0.494153    1.045630   -31.00000   -1.20000
AFIX   0
C59'  1   -0.013643   -0.429715    1.106364   -31.00000    0.04635    0.06078 =
         0.06863    0.03725   -0.00207   -0.00131
AFIX  43
H59'  2   -0.019365   -0.470732    1.136118   -31.00000   -1.20000
AFIX   0
C60'  1   -0.042541   -0.358999    1.115606   -31.00000    0.05656    0.05608 =
         0.04712    0.02678   -0.00033   -0.00884
AFIX  43
H60'  2   -0.070848   -0.352538    1.150764   -31.00000   -1.20000
AFIX   0
C61'  1   -0.031381   -0.294096    1.073715   -31.00000    0.04608    0.04671 =
         0.04390    0.01467    0.00471   -0.00041
AFIX  43
H61'  2   -0.051058   -0.244188    1.080763   -31.00000   -1.20000
AFIX   0
C62'  1   -0.109923   -0.088035    0.901083   -31.00000    0.03537    0.03459 =
         0.02367    0.00408    0.00522   -0.00742
C63'  1   -0.214921   -0.142847    0.865896   -31.00000    0.03714    0.03896 =
         0.03540    0.00234    0.00915    0.00601
AFIX  43
H63'  2   -0.235538   -0.206932    0.856608   -31.00000   -1.20000
AFIX   0
C64'  1   -0.291299   -0.107251    0.843667   -31.00000    0.03185    0.04750 =
         0.04184    0.00214   -0.00014   -0.00426
AFIX  43
H64'  2   -0.363244   -0.146731    0.822715   -31.00000   -1.20000
AFIX   0
C65'  1   -0.261018   -0.013894    0.852499   -31.00000    0.03525    0.04072 =
         0.04558    0.00364    0.00153    0.00563
AFIX  43
H65'  2   -0.311154    0.011849    0.836778   -31.00000   -1.20000
AFIX   0
C66'  1   -0.155820    0.040852    0.884824   -31.00000    0.03163    0.04770 =
         0.04023    0.00045    0.00409    0.00151
AFIX  43
H66'  2   -0.134642    0.104968    0.891436   -31.00000   -1.20000
AFIX   0
C67'  1   -0.081459    0.006748    0.907530   -31.00000    0.03025    0.03806 =
         0.03052    0.00712    0.00777    0.00725
AFIX  43
H67'  2   -0.009692    0.047009    0.927921   -31.00000   -1.20000
AFIX   0

PART 0
C68   1    0.502358    0.315618    0.990521    11.00000    0.02607    0.02645 =
         0.02815    0.00315    0.00184   -0.00105
C69   1    0.595667    0.303425    0.992438    11.00000    0.02672    0.03014 =
         0.03323    0.00355    0.00344    0.00223
C70   1    0.681958    0.338665    1.051863    11.00000    0.02750    0.03522 =
         0.03630    0.00248    0.00280    0.00507
AFIX  43
H70   2    0.744337    0.329179    1.053217    11.00000   -1.20000
AFIX   0
C71   1    0.678814    0.386854    1.108572    11.00000    0.02761    0.03441 =
         0.03451    0.00181    0.00016    0.00234
C72   1    0.586903    0.400959    1.105171    11.00000    0.02792    0.03422 =
         0.03059   -0.00005    0.00280    0.00225
AFIX  43
H72   2    0.583958    0.434916    1.143332    11.00000   -1.20000
AFIX   0
C73   1    0.498905    0.366433    1.047054    11.00000    0.02591    0.02889 =
         0.03091    0.00341    0.00326    0.00075
C74   1    0.608484    0.255058    0.933640    11.00000    0.02935    0.03508 =
         0.03232    0.00432    0.00227    0.00774
C75   1    0.537257    0.167916    0.897940    11.00000    0.03294    0.03568 =
         0.03947    0.00328    0.00691    0.00681
AFIX  43
H75   2    0.476682    0.137766    0.910330    11.00000   -1.20000
AFIX   0
C76   1    0.554316    0.125208    0.844661    11.00000    0.04215    0.03686 =
         0.04442   -0.00096    0.00619    0.00988
AFIX  43
H76   2    0.505060    0.066165    0.820677    11.00000   -1.20000
AFIX   0
C77   1    0.642401    0.167670    0.825996    11.00000    0.04797    0.04661 =
         0.04178    0.00308    0.01280    0.01836
AFIX  43
H77   2    0.653593    0.138100    0.789349    11.00000   -1.20000
AFIX   0
C78   1    0.713986    0.253603    0.861238    11.00000    0.03969    0.04804 =
         0.04653    0.00796    0.01541    0.01139
AFIX  43
H78   2    0.775140    0.282926    0.849183    11.00000   -1.20000
AFIX   0
C79   1    0.696539    0.296964    0.914145    11.00000    0.03206    0.03892 =
         0.04049    0.00272    0.00670    0.00593
AFIX  43
H79   2    0.745572    0.356355    0.937516    11.00000   -1.20000
AFIX   0

rem restraints
FLAT 0.005 C71 C80 C81 C82 C83 C84 C85
FLAT 0.005 C71 C80' C81' C82' C83' C84' C85'
SADI 0.01 C71 C80 C71 C80'
SIMU 0.01 C80 > C85'

PART 1
C80   1    0.777858    0.417221    1.166530    41.00000    0.02040    0.05397 =
         0.02549   -0.00499    0.01426    0.01154
C81   1    0.839654    0.366827    1.177082    41.00000    0.03312    0.06379 =
         0.03503    0.00230   -0.00020    0.01626
AFIX  43
H81   2    0.819537    0.311126    1.147025    41.00000   -1.20000
AFIX   0
C82   1    0.931650    0.398333    1.232122    41.00000    0.04622    0.07789 =
         0.04409   -0.00494   -0.00359    0.01865
AFIX  43
H82   2    0.974667    0.364334    1.239840    41.00000   -1.20000
AFIX   0
C83   1    0.959330    0.478873    1.274959    41.00000    0.04492    0.08421 =
         0.04603   -0.01159   -0.00704    0.01867
AFIX  43
H83   2    1.021997    0.500121    1.312391    41.00000   -1.20000
AFIX   0
C84   1    0.898172    0.530249    1.265085    41.00000    0.03498    0.07606 =
         0.04641   -0.01885   -0.00271    0.01581
AFIX  43
H84   2    0.918536    0.585883    1.295289    41.00000   -1.20000
AFIX   0
C85   1    0.806671    0.498686    1.210189    41.00000    0.02817    0.06159 =
         0.04142   -0.00969    0.00246    0.01397
AFIX  43
H85   2    0.763841    0.532854    1.202540    41.00000   -1.20000
AFIX   0

PART 2
SAME C80 > C85
C80'  1    0.765298    0.420009    1.174045   -41.00000    0.02775    0.04811 =
         0.03488   -0.00217    0.00115    0.00878
C81'  1    0.820699    0.366985    1.196324   -41.00000    0.04004    0.05814 =
         0.03581   -0.00049    0.00091    0.01713
AFIX  43
H81'  2    0.803724    0.309526    1.169565   -41.00000   -1.20000
AFIX   0
C82'  1    0.901144    0.397725    1.257808   -41.00000    0.04688    0.08546 =
         0.04126    0.00240   -0.00269    0.03021
AFIX  43
H82'  2    0.938487    0.360906    1.272854   -41.00000   -1.20000
AFIX   0
C83'  1    0.926853    0.480837    1.296816   -41.00000    0.03870    0.09761 =
         0.03941   -0.01352   -0.00960    0.02157
AFIX  43
H83'  2    0.981726    0.501381    1.338720   -41.00000   -1.20000
AFIX   0
C84'  1    0.872811    0.534416    1.275009   -41.00000    0.03520    0.07975 =
         0.05114   -0.02610   -0.00532    0.01380
AFIX  43
H84'  2    0.890606    0.591983    1.301916   -41.00000   -1.20000
AFIX   0
C85'  1    0.792569    0.504493    1.213915   -41.00000    0.03151    0.05497 =
         0.04809   -0.01384   -0.00288    0.00981
AFIX  43
H85'  2    0.755882    0.541873    1.199110   -41.00000   -1.20000
AFIX   0

PART 0
C86   1    0.406233    0.386634    1.049851    11.00000    0.02482    0.02807 =
         0.03448   -0.00033    0.00220   -0.00162
C87   1    0.372583    0.375686    1.106087    11.00000    0.03007    0.03387 =
         0.03958    0.00353    0.00755    0.00216
AFIX  43
H87   2    0.403966    0.348828    1.139207    11.00000   -1.20000
AFIX   0
C88   1    0.294318    0.403343    1.114261    11.00000    0.03491    0.03799 =
         0.05049    0.00303    0.01552    0.00379
AFIX  43
H88   2    0.272008    0.395133    1.152560    11.00000   -1.20000
AFIX   0
C89   1    0.248690    0.443068    1.066273    11.00000    0.02999    0.03926 =
         0.05580   -0.00140    0.00714    0.00519
AFIX  43
H89   2    0.195985    0.463277    1.072088    11.00000   -1.20000
AFIX   0
C90   1    0.280036    0.453303    1.009736    11.00000    0.03273    0.03618 =
         0.04671    0.00176   -0.00110    0.00609
AFIX  43
H90   2    0.247734    0.479560    0.976556    11.00000   -1.20000
AFIX   0
C91   1    0.358220    0.425444    1.001363    11.00000    0.03047    0.03190 =
         0.03512    0.00007    0.00117    0.00203
AFIX  43
H91   2    0.379232    0.432760    0.962528    11.00000   -1.20000
AFIX   0
N1    3    0.155157    0.178130    0.716289    11.00000    0.02946    0.03569 =
         0.02642    0.00358    0.00262   -0.00038
N2    3    0.068995    0.039876    0.769230    11.00000    0.02854    0.03342 =
         0.02331    0.00253    0.00303    0.00107
N3    3    0.237750    0.131190    0.885005    11.00000    0.02335    0.02854 =
         0.02692    0.00215    0.00343    0.00028
N4    3    0.305626    0.255068    0.816270    11.00000    0.02742    0.03095 =
         0.02653    0.00347    0.00296    0.00161

rem restraints
FLAT 0.005 C1S > C6S
SIMU 0.01 C1S > C6S'

rem lattice solvent molecule
PART 1
C1S   1    0.107335    0.411359    0.186848    51.00000    0.07005    0.06513 =
         0.06881    0.01675    0.03638    0.03451
AFIX  43
H1S   2    0.073575    0.405943    0.140522    51.00000   -1.20000
AFIX   0
C2S   1    0.090598    0.335662    0.214932    51.00000    0.06218    0.05467 =
         0.06520    0.00597    0.02117    0.01865
AFIX  43
H2S   2    0.044835    0.277407    0.187746    51.00000   -1.20000
AFIX   0
C3S   1    0.140000    0.343601    0.282698    51.00000    0.08159    0.05517 =
         0.07406    0.01392    0.00643    0.02296
AFIX  43
H3S   2    0.128008    0.290887    0.301592    51.00000   -1.20000
AFIX   0
C4S   1    0.206554    0.428095    0.322629    51.00000    0.10594    0.06841 =
         0.08772    0.00958   -0.00856    0.02619
AFIX  43
H4S   2    0.240196    0.433869    0.369028    51.00000   -1.20000
AFIX   0
C5S   1    0.223736    0.504443    0.294237    51.00000    0.10241    0.05409 =
         0.10464    0.00086    0.00791    0.01610
AFIX  43
H5S   2    0.269702    0.562888    0.321040    51.00000   -1.20000
AFIX   0
C6S   1    0.173860    0.495015    0.227105    51.00000    0.09291    0.06010 =
         0.09124    0.01764    0.04028    0.02801
AFIX  43
H6S   2    0.185655    0.547600    0.208064    51.00000   -1.20000
AFIX   0

PART 2
SAME 0.01 C1S > C6S
C1S'  1    0.097849    0.420706    0.192532   -51.00000    0.07679    0.05954 =
         0.07635    0.01648    0.03539    0.03245
AFIX  43
H1S'  2    0.039508    0.417160    0.156364   -51.00000   -1.20000
AFIX   0
C2S'  1    0.097697    0.345126    0.218323   -51.00000    0.08199    0.06272 =
         0.07874    0.01457    0.01748    0.01985
AFIX  43
H2S'  2    0.039217    0.288791    0.198751   -51.00000   -1.20000
AFIX   0
C3S'  1    0.180957    0.349060    0.272315   -51.00000    0.10020    0.06302 =
         0.08194   -0.00112    0.01309    0.01707
AFIX  43
H3S'  2    0.183093    0.295427    0.287024   -51.00000   -1.20000
AFIX   0
C4S'  1    0.260207    0.432809    0.303870   -51.00000    0.10759    0.07181 =
         0.08668   -0.00172    0.00837    0.02052
AFIX  43
H4S'  2    0.313009    0.438886    0.344428   -51.00000   -1.20000
AFIX   0
C5S'  1    0.262641    0.507780    0.276395   -51.00000    0.10759    0.05538 =
         0.09245   -0.00107    0.02732    0.02276
AFIX  43
H5S'  2    0.319745    0.564714    0.296835   -51.00000   -1.20000
AFIX   0
C6S'  1    0.183959    0.501505    0.220033   -51.00000    0.09873    0.05527 =
         0.08739    0.01204    0.03322    0.03197
AFIX  43
H6S'  2    0.188901    0.552823    0.200028   -51.00000   -1.20000
AFIX   0
HKLF      4

REM    xs1131a
REM R1 =  0.0442 for   14426 Fo > 4sig(Fo)  and  0.0517 for all   16788 data
REM   1266 parameters refined using   1252 restraints

END

WGHT      0.0675      0.8424

REM No hydrogen bonds found for HTAB generation

REM Highest difference peak  0.387,  deepest hole -0.477,  1-sigma level  0.036
Q1    1   0.2809  0.0433  0.7366  11.00000  0.05    0.39
Q2    1   0.2246  0.0666  0.7488  11.00000  0.05    0.25
Q3    1   0.3641  0.5002  0.3126  11.00000  0.05    0.22
Q4    1   0.2727  0.3506  0.2939  11.00000  0.05    0.22
Q5    1   0.3389  0.4202  0.3042  11.00000  0.05    0.20
Q6    1   0.2417  0.2363  0.8175  11.00000  0.05    0.20
Q7    1   0.2221  0.3639  0.3212  11.00000  0.05    0.19
Q8    1   0.3041  0.5139  0.3413  11.00000  0.05    0.18
Q9    1   0.2308  0.1241  0.8513  11.00000  0.05    0.18
Q10   1   0.4974  0.3359  1.0182  11.00000  0.05    0.18
;
_shelx_res_checksum   27888

_shelx_hkl_file
;
   0   0  -1 155485. 2086.99   1
   0   0  -2 18524.4 398.941   1
   0   0   2 19626.1 303.711  21
   0   0   3 1442.31 61.1291  21
   0   0  -3 1505.40 118.278   1
   0   0   4 54491.7 798.550  21
   0   0  -4 50152.3 1031.30   1
   0   0   5 8717.14 212.401  21
   0   0  -5 8714.51 389.134   1
   0   0   6 2131.08 194.700   6
   0   0   6 2444.10 108.435  21
   0   0  -6 2370.98 226.154   1
   0   0  -7 1854.36 217.379   1
   0   0   7 1867.61 195.486   6
   0   0   7 2132.94 105.151  21
   0   0   8 15741.4 613.801   6
   0   0  -8 13419.8 636.053   1
   0   0   9 6046.45 405.838   6
   0   0  -9 5675.55 436.078   3
   0   0  -9 5745.63 441.984   1
   0   0 -10 74584.6 1819.07   3
   0   0 -10 77048.0 1941.42   1
   0   0  10 80848.3 1818.20   6
   0   0 -11 565.622 132.702   4
   0   0 -11 394.270 153.306   1
   0   0 -11 334.128 120.785   3
   0   0  11 377.034 127.912   6
   0   0 -12 3097.20 317.897   3
   0   0 -12 3200.98 371.647   1
   0   0  12 3248.89 354.078   6
   0   0 -12 3254.40 336.229   4
   0   0 -13 1006.25 213.447   1
   0   0 -13 1110.17 222.721   4
   0   0  13 1081.25 240.799   6
   0   0 -14 26494.4 1150.19   1
   0   0  14 24087.9 1075.13   6
   0   0 -14 26472.7 1051.59   4
   0   0 -15 1097.98 237.699   4
   0   0  15 844.339 225.468   6
   0   0 -16 176.367 139.133   4
   0   0 -16 325.415 110.947   8
   0   0 -16 180.594 93.4477  19
   0   0 -16 128.669 72.1412  14
   0   0 -16 73.3965 74.5472  10
   0   0  16 81.9122 72.1200  17
   0   0  16 126.061 116.045   6
   0   0 -17 2036.42 175.487  14
   0   0 -17 2308.01 192.904   8
   0   0  17 1953.25 153.180  17
   0   0 -17 1946.50 201.792  10
   0   0 -17 2159.65 203.720  19
   0   0 -18 562.180 118.240   8
   0   0 -18 360.182 96.6970  14
   0   0 -18 267.439 100.608  19
   0   0 -18 340.722 122.802  10
   0   0  18 277.200 79.7465  17
   0   0 -19 697.351 130.058  10
   0   0 -19 875.305 147.800  19
   0   0  19 716.806 98.4709  17
   0   0 -19 733.551 123.984   8
   0   0 -19 719.682 120.895  14
   0   0 -20 380.767 122.524  10
   0   0  20 490.380 85.8853  17
   0   0 -20 471.123 123.683  19
   0   0 -20 308.944 94.6864   8
   0   0 -20 265.679 93.1981  14
   0   0 -21 1266.84 128.525  14
   0   0  21 1265.02 113.702  17
   0   0 -21 1406.54 143.300   8
   0   0 -21 1264.28 166.514  19
   0   0 -22 419.950 105.657  19
   0   0 -22 246.397 63.3490  14
   0   0 -22 346.092 87.0080  12
   0   0 -23 123.052 66.3403  19
   0   0 -23 86.4448 59.3728  12
   0   0 -24 235.547 54.2581  12
   0   0 -24 322.895 70.2463  19
   0   1 -24 13.6010 51.7964  19
   0   1 -24 40.2583 43.2118  12
   0   1 -23 107.237 65.0783  12
   0   1 -23 81.7443 48.4096  14
   0   1 -23 204.319 80.2026  19
   0   1 -22 1221.13 147.985  19
   0   1 -22 1393.31 134.327  12
   0   1 -22 1050.26 115.500  14
   0   1 -21 157.721 76.1537  14
   0   1 -21 21.5075 81.0266   8
   0   1 -20 402.263 104.332   8
   0   1 -20 434.589 113.446  19
   0   1 -20 428.616 101.751  14
   0   1 -19 4547.69 262.880   8
   0   1 -19 4548.74 300.324  19
   0   1 -19 4743.50 297.265  10
   0   1 -19 4394.30 260.429  14
   0   1 -18 5918.13 335.067  10
   0   1 -18 5982.25 342.079  19
   0   1 -18 6139.60 307.362   8
   0   1 -18 5731.35 299.082  14
   0  -1  17 9245.96 704.022   6
   0   1 -17 8631.78 362.540  14
   0   1 -17 8490.07 399.853  19
   0   1 -17 8967.64 409.558  10
   0   1 -17 9195.71 655.031   4
   0   1 -17 8975.28 366.639   8
   0   1 -16 15932.9 854.503   4
   0   1 -16 14887.0 526.484  10
   0   1 -16 15054.7 471.640  14
   0   1 -16 14270.4 481.782   8
   0  -1  16 14933.1 883.229   6
   0   1 -16 15177.0 529.528  19
   0  -1  15 14489.4 843.153   6
   0   1 -15 16154.3 849.130   4
   0  -1  14 742.091 200.149   6
   0   1 -14 911.188 204.139   4
   0   1 -14 1031.36 237.211   1
   0   1 -13 3232.67 358.327   4
   0  -1  13 3393.76 375.389   6
   0   1 -13 3905.66 415.287   1
   0  -1  12 18986.8 859.906   6
   0   1 -12 20139.2 826.393   4
   0   1 -12 19385.0 914.529   1
   0   1 -11 25089.3 880.577   4
   0  -1  11 23801.8 923.966   6
   0   1 -11 22975.8 843.485   3
   0   1 -11 23849.7 990.328   1
   0   1 -10 7984.00 493.917   3
   0  -1  10 8650.71 286.951  21
   0  -1  10 8447.50 507.002   6
   0   1 -10 8223.06 536.070   1
   0   1 -10 9430.23 494.775   4
   0  -1   9 8486.23 281.634  21
   0  -1   9 8345.84 469.665   6
   0   1  -9 8316.34 494.075   1
   0  -1   8 3347.77 166.887  21
   0  -1   8 3263.82 277.742   6
   0   1  -8 3159.07 285.860   1
   0  -1   7 824.897 81.8299  21
   0  -1   7 654.081 122.627   6
   0   1  -6 30077.7 756.219   1
   0  -1   6 29309.2 772.577   6
   0  -1   6 27563.2 553.617  21
   0   1  -5 111736. 1785.83   1
   0   1  -5 109353. 1843.16   2
   0  -1   5 109450. 1611.65  21
   0   1  -4 181144. 2657.74   2
   0  -1   4 175542. 2476.68  21
   0   1  -4 182904. 2568.60   1
   0   1  -3 153.303 43.2131   2
   0  -1   3 287.347 40.6917  21
   0   1  -3 178.458 36.4974   1
   0   1  -2 1206.13 61.7353   1
   0  -1   2 1271.09 73.8069  21
   0   1  -2 1142.05 76.1506   2
   0  -1   1 158424. 2061.92   3
   0   1  -1 156894. 2135.05   2
   0  -1   1 155552. 2153.19  21
   0   1   0 174989. 2257.65   2
   0  -1   0 183223. 2288.63   3
   0  -1  -1 32582.9 570.275   1
   0  -1  -1 29829.8 498.776  21
   0  -1  -2 1853.37 135.502   1
   0   1   2 2185.16 136.225  22
   0   1   3 50734.8 765.185   5
   0   1   3 51111.9 1009.02  22
   0  -1  -3 50064.6 1033.46   1
   0   1   4 128560. 1980.76   6
   0  -1  -4 121197. 2111.06   1
   0   1   4 133000. 2116.75  22
   0   1   4 119782. 1660.74   5
   0   1   5 1724.99 65.3450   5
   0  -1  -5 1977.07 217.155   1
   0   1   5 1919.29 171.140   6
   0  -1  -6 2380.44 258.633   1
   0   1   6 2204.82 200.209   6
   0   1   7 4070.88 294.500   6
   0  -1  -7 3978.97 348.401   1
   0  -1  -8 35654.1 1152.50   1
   0   1   8 36681.4 1029.71   6
   0   1   9 4912.47 367.448   6
   0  -1  -9 4408.46 403.567   3
   0  -1  -9 4707.57 412.593   1
   0  -1 -10 1153.50 237.358   1
   0  -1 -10 944.826 190.132   3
   0   1  10 908.181 169.723   6
   0   1  11 1683.83 246.806   6
   0  -1 -11 1928.80 260.146   3
   0  -1 -11 2102.72 290.834   1
   0  -1 -11 2157.71 258.954   4
   0   1  12 2950.41 338.109   6
   0  -1 -12 2734.08 352.647   1
   0  -1 -12 3228.83 334.428   3
   0  -1 -12 2774.83 303.964   4
   0  -1 -13 6115.83 558.245   1
   0  -1 -13 6147.81 453.608   3
   0  -1 -13 5738.91 458.732   4
   0   1  13 5892.18 508.770   6
   0   1  14 2151.24 324.555   6
   0  -1 -14 2040.89 293.904   4
   0  -1 -15 392.348 201.017   4
   0  -1 -15 103.733 71.9692  10
   0  -1 -15 352.590 91.9416  19
   0  -1 -15 211.246 76.7455   8
   0   1  15 236.642 144.271   6
   0  -1 -16 469.777 100.540   8
   0  -1 -16 435.105 115.818  10
   0  -1 -16 471.831 150.741   4
   0  -1 -16 347.392 101.944  19
   0  -1 -16 268.251 74.3999  14
   0   1  16 400.921 93.3052  17
   0   1  16 333.666 133.482   6
   0  -1 -17 3118.23 243.781  19
   0   1  17 2914.81 195.768  17
   0  -1 -17 2972.41 213.635   8
   0  -1 -17 3060.44 205.829  14
   0  -1 -17 2768.48 241.248  10
   0  -1 -18 694.796 124.294  14
   0   1  18 606.333 97.1991  17
   0  -1 -18 478.276 118.151  19
   0  -1 -18 668.955 120.399   8
   0  -1 -18 490.346 126.398  10
   0  -1 -19 135.024 69.0866  14
   0  -1 -19-4.90069 88.5980  19
   0  -1 -19 22.3299 83.7323   8
   0  -1 -19 158.868 107.127  10
   0   1  19 80.0356 70.6821  17
   0  -1 -20 53.8522 99.8402  19
   0  -1 -20 9.58163 67.2085  14
   0   1  20 50.5691 59.5509  17
   0  -1 -20 126.198 99.6672  10
   0  -1 -20 190.204 85.8170   8
   0   1  21 314.085 71.0666  17
   0  -1 -21 537.201 117.325  19
   0  -1 -21 342.092 93.1358   8
   0  -1 -22 1039.52 139.576  19
   0  -1 -22 1132.12 123.521  12
   0   1  22 1120.82 99.0093  17
   0  -1 -23 228.193 76.4066  19
   0  -1 -23 95.8489 60.7402  12
   0  -1 -24 49.5724 38.9450  12
   0  -1 -24 68.4021 46.2789  19
   0   2 -25 127.241 35.1629  12
   0   2 -25 227.157 52.4028  19
   0   2 -24-74.9739 57.4674  19
   0   2 -24-9.47625 36.6432  14
   0   2 -24-94.8195 45.1166  12
   0   2 -23 307.757 69.9884  14
   0   2 -23 183.992 66.8504  12
   0   2 -22 2420.24 167.339  12
   0   2 -22 2352.63 172.860  14
   0   2 -22 2557.37 210.084  19
   0   2 -21 4987.90 307.058  19
   0   2 -21 5144.65 255.994  12
   0   2 -21 4884.38 259.702  14
   0   2 -20 951.645 134.948  14
   0   2 -20 911.196 147.101  19
   0   2 -20 1089.89 145.609   8
   0   2 -19 674.356 114.232   8
   0   2 -19 688.038 126.458  14
   0   2 -19 598.620 128.259  19
   0   2 -18 4577.91 271.623  14
   0   2 -18 5120.20 317.966  19
   0   2 -18 5360.84 280.515   8
   0   2 -17 6642.21 561.600   4
   0   2 -17 6360.95 302.024   8
   0   2 -17 6079.93 336.658  10
   0   2 -17 6056.00 302.781  14
   0  -2  17 5772.72 547.152   6
   0   2 -17 6280.00 338.663  19
   0   2 -16 63.6109 79.5047  19
   0   2 -16 186.269 155.721   4
   0   2 -16 233.045 88.6383  14
   0   2 -16 292.082 100.292  10
   0  -2  16 227.709 157.432   6
   0   2 -16 339.886 92.6941   8
   0  -2  15 108.674 140.982   6
   0   2 -15 148.499 144.053   4
   0  -2  14 14928.5 829.729   6
   0   2 -14 15847.4 798.781   4
   0   2 -13 308.585 135.987   1
   0  -2  13 395.142 166.707   6
   0   2 -13 535.497 164.980   4
   0  -2  12 3215.79 355.155   6
   0   2 -12 3355.09 334.390   4
   0   2 -12 3786.54 386.680   1
   0  -2  11 32642.2 1115.00   6
   0  -2  11 33493.8 747.064  21
   0   2 -11 31722.8 1119.79   1
   0   2 -11 33310.2 1053.70   4
   0   2 -10 5019.08 393.220   1
   0  -2  10 5077.43 245.735  21
   0  -2  10 4909.60 381.915   6
   0   2 -10 5531.27 375.488   4
   0   2 -10 4000.91 318.986   3
   0  -2   9 63609.9 1156.48  21
   0   2  -9 63215.4 1473.53   1
   0   2  -9 66004.3 1438.43   4
   0  -2   9 62746.7 1496.73   6
   0  -2   8 55910.8 1030.16  21
   0   2  -8 56637.0 1245.34   4
   0  -2   8 56011.6 1324.20   6
   0   2  -8 56691.1 1258.01   1
   0   2  -7 5208.19 288.578   1
   0  -2   7 4659.86 216.056  21
   0   2  -7 5080.09 294.689   4
   0   2  -7 5168.67 318.889   2
   0  -2   7 4774.43 312.149   6
   0  -2   6 1545.64 123.669  21
   0   2  -6 1018.06 143.630   2
   0  -2   6 1156.54 137.996   6
   0   2  -6 1231.94 124.305   1
   0   2  -5 51914.7 923.505   1
   0   2  -5 52107.7 1051.84   2
   0  -2   5 50663.4 914.064  21
   0   2  -4 22122.0 551.029   2
   0  -2   4 21731.2 490.265  21
   0   2  -4 21478.8 450.241   1
   0   2  -4 21434.3 496.912   4
   0   2  -3 280.805 47.6773   4
   0  -2   3 319.201 28.2389   3
   0   2  -3 283.683 43.0100   1
   0  -2   3 312.284 58.2159  21
   0   2  -3 244.045 53.0233   2
   0   2  -2 724.794 73.8225   2
   0  -2   2 861.812 46.5217   3
   0   2  -2 805.069 56.7339   4
   0  -2   1 146904. 2003.72   3
   0   2  -1 149619. 1959.32   4
   0  -2   1 150021. 2142.23  21
   0   2  -1 143987. 2082.25   2
   0  -2   0 817.023 80.7578  21
   0  -2   0 916.870 80.2942   3
   0   2   0 774.404 68.1665   2
   0  -2  -1 7863.31 245.600  21
   0  -2  -1 7515.91 306.688   3
   0   2   2 62775.6 1081.36  22
   0  -2  -2 63358.9 1151.09   1
   0  -2  -2 61350.8 969.794  21
   0   2   3 308768. 4128.88  22
   0  -2  -3 282413. 4344.16   3
   0  -2  -3 306903. 4178.07   1
   0   2   4 1865.49 191.946  22
   0  -2  -4 2656.16 233.825   1
   0   2   4 2045.17 126.311   5
   0  -2  -4 2476.14 267.940   3
   0   2   5 19276.3 402.331   5
   0  -2  -5 18014.5 772.629   3
   0  -2  -5 19253.6 700.047   1
   0   2   6 5605.48 332.319   6
   0   2   6 5275.69 163.968   5
   0  -2  -6 5843.66 405.357   1
   0  -2  -6 5421.77 422.501   3
   0   2   7 1840.72 81.4620   5
   0  -2  -7 2308.50 286.643   3
   0   2   7 1771.04 203.439   6
   0  -2  -7 1947.97 258.208   1
   0   2   8 1004.32 165.594   6
   0  -2  -8 1429.17 237.927   1
   0  -2  -8 1365.68 232.678   3
   0  -2  -9 2205.89 293.312   3
   0   2   9 2054.66 254.192   6
   0  -2  -9 2140.12 286.052   1
   0  -2 -10 482.575 173.289   3
   0   2  10 278.785 118.856   6
   0  -2 -10 76.8724 122.907   1
   0   2  11 18004.5 829.031   6
   0  -2 -11 19901.3 870.980   3
   0  -2 -11 19397.4 935.397   1
   0  -2 -11 19283.3 781.206   4
   0   2  12 12054.7 699.549   6
   0  -2 -12 12515.7 680.746   3
   0  -2 -12 12329.7 645.117   4
   0  -2 -13 836.219 197.374   3
   0  -2 -13 751.298 175.658   4
   0   2  13 981.940 233.747   6
   0   2  14 12543.4 783.476   6
   0  -2 -14 12907.7 723.295   4
   0  -2 -14 13362.6 700.280   3
   0  -2 -15 8653.23 387.811  19
   0   2  15 8166.66 329.130  17
   0   2  15 7701.28 618.326   6
   0  -2 -15 8165.09 372.197  10
   0  -2 -15 8319.79 342.175   8
   0  -2 -15 8419.56 600.498   4
   0   2  16 9745.43 708.240   6
   0  -2 -16 10740.9 448.021  19
   0  -2 -16 10508.5 683.410   4
   0   2  16 10065.5 378.769  17
   0  -2 -16 10917.5 452.521  10
   0  -2 -16 10251.3 392.151   8
   0   2  17-56.4855 69.7556  17
   0  -2 -17 96.6978 99.2443  19
   0  -2 -17-127.173 96.2223   8
   0  -2 -17 160.212 104.685  10
   0  -2 -18 2781.97 239.482  10
   0  -2 -18 3299.16 221.516   8
   0   2  18 3209.26 212.148  17
   0  -2 -18 3200.11 252.520  19
   0  -2 -19 3041.83 243.883  10
   0  -2 -19 2883.36 236.890  19
   0   2  19 3073.70 204.234  17
   0  -2 -19 3246.92 214.877   8
   0  -2 -20 7463.53 357.634  10
   0  -2 -20 6872.13 351.100  19
   0  -2 -20 7064.43 295.974   8
   0   2  20 6585.23 285.978  17
   0  -2 -21 5985.52 309.895  19
   0  -2 -21 5836.60 252.153   8
   0   2  21 6127.55 251.011  17
   0   2  22 140.389 49.4006  17
   0  -2 -22 122.290 72.4372  12
   0  -2 -22 40.2244 67.9805  19
   0  -2 -23 111.900 54.5487  12
   0  -2 -23 97.4177 61.2001  19
   0   3 -25 230.284 51.6318  19
   0   3 -24 445.829 84.0452  19
   0   3 -24 428.247 69.1751  14
   0   3 -24 439.567 65.2031  12
   0  -3  24 379.907 64.1189  13
   0   3 -23 1529.17 117.719  12
   0   3 -23 1335.33 121.636  14
   0   3 -22 3957.65 255.623  19
   0   3 -22 4107.66 208.527  12
   0   3 -22 3988.14 230.658  14
   0   3 -21 207.978 103.642  19
   0   3 -21 377.498 100.216  14
   0   3 -21 283.378 86.5755  12
   0   3 -20 170.977 87.0656  14
   0   3 -20 236.396 100.026  19
   0   3 -20 216.110 83.4185  12
   0   3 -20 66.6030 81.5333   8
   0   3 -19 1129.04 154.666  14
   0   3 -19 826.223 148.128  19
   0   3 -19 987.447 133.809   8
   0   3 -18 552.967 130.657  19
   0   3 -18 422.309 102.431   8
   0   3 -18 370.316 103.207  14
   0   3 -17 8818.60 357.359   8
   0   3 -17 8951.90 391.319  14
   0   3 -17 9429.33 664.994   4
   0   3 -17 9435.93 419.322  19
   0  -3  17 9940.44 736.680   6
   0   3 -16 2537.05 211.924  19
   0   3 -16 2193.71 173.855   8
   0  -3  16 2135.86 323.911   6
   0   3 -16 2751.58 367.599   4
   0   3 -16 2337.81 190.006  14
   0   3 -15 13810.3 777.805   4
   0  -3  15 13783.2 835.159   6
   0  -3  14-16.5261 118.835   6
   0   3 -14 91.4566 120.532   4
   0  -3  13 1113.50 223.478   6
   0   3 -13 1346.89 231.974   4
   0   3 -12 424.712 142.551   1
   0   3 -12 523.082 158.682   4
   0  -3  12 221.538 70.0129  21
   0  -3  12 125.349 86.9442   6
   0   3 -11 11288.4 574.263   4
   0  -3  11 10985.7 425.159  21
   0  -3  11 10320.7 608.393   6
   0   3 -11 11438.1 604.894   1
   0  -3  10 80989.4 1856.00   6
   0   3 -10 84400.3 1776.66   4
   0   3 -10 82940.7 1775.89   1
   0  -3  10 81344.2 1488.61  21
   0   3  -9 10858.5 490.011   1
   0  -3   9 11403.7 409.003  21
   0  -3   9 11156.3 553.118   6
   0   3  -9 10811.9 501.610   4
   0   3  -9 10895.8 555.626   2
   0   3  -8 55039.7 1308.83   2
   0   3  -8 53640.7 1206.22   4
   0  -3   8 54131.8 1064.57  21
   0  -3   8 52835.8 1286.67   6
   0   3  -8 53515.6 1140.50   1
   0   3  -7 12963.0 477.763   4
   0  -3   7 13096.9 425.727  21
   0   3  -7 12977.0 431.278   1
   0  -3   7 12600.0 518.340   6
   0   3  -7 12354.9 525.586   2
   0  -3   6 11915.6 397.919  21
   0  -3   6 12243.2 476.030   6
   0   3  -6 12881.5 488.920   2
   0   3  -6 12213.2 377.640   1
   0   3  -6 12225.4 430.169   4
   0  -3   5 119538. 2020.89   6
   0   3  -5 119279. 1828.72   1
   0  -3   5 126082. 1941.75  21
   0   3  -5 123302. 2031.68   2
   0   3  -5 120536. 1906.94   4
   0   3  -4 243940. 3550.84   2
   0   3  -4 242454. 3408.73   4
   0  -3   4 249905. 3522.01  21
   0  -3   4 243031. 3247.45   3
   0   3  -4 245970. 3392.36   1
   0   3  -3 6697.05 275.694   2
   0   3  -3 6492.30 207.074   4
   0  -3   3 6503.23 273.444   6
   0  -3   3 6771.21 174.945   3
   0  -3   3 7136.13 285.195  21
   0  -3   2 131122. 1849.38   3
   0   3  -2 133079. 1833.70   4
   0  -3   2 130363. 2020.98   6
   0   3  -2 130555. 2005.05   2
   0   3  -1 543830. 7114.20   4
   0  -3   1 570724. 7397.45  21
   0  -3   1 551951. 7235.73   3
   0   3  -1 529962. 7328.10   2
   0  -3   1 552008. 7350.78   6
   0  -3   0 88129.9 1441.67  21
   0  -3   0 91021.2 1428.31   3
   0  -3  -1 127327. 1955.49  21
   0  -3  -1 134573. 2117.00   3
   0  -3  -2 33733.5 881.845   3
   0   3   2 33251.3 722.453  22
   0  -3  -2 32804.4 628.659  21
   0  -3  -3 108887. 2034.24   3
   0  -3  -3 104446. 1508.58  21
   0   3   3 103754. 1830.58  22
   0   3   4 77407.1 1544.93  22
   0  -3  -4 72257.8 1024.06  21
   0   3   4 73133.7 1339.26   5
   0  -3  -4 79705.8 1692.91   3
   0  -3  -5 11700.1 600.289   3
   0  -3  -5 11693.6 566.055   1
   0   3   5 12101.6 550.801  22
   0   3   5 11414.1 366.486   5
   0  -3  -6 2635.37 293.699   3
   0   3   6 3009.20 299.607  22
   0   3   6 2672.07 149.932   5
   0  -3  -6 3051.98 306.935   1
   0  -3  -7 1589.92 247.324   3
   0  -3  -7 1695.18 237.646   1
   0   3   7 1255.33 92.6661   5
   0   3   7 1391.72 198.452   6
   0  -3  -8 3819.77 373.628   3
   0  -3  -8 3578.27 373.193   1
   0   3   8 3213.34 308.686   6
   0  -3  -9 36183.2 1223.09   3
   0   3   9 33824.0 1104.08   6
   0  -3 -10 13504.6 721.421   3
   0   3  10 11971.4 657.857   6
   0  -3 -11 401.005 143.664   4
   0   3  11 230.550 110.106   6
   0  -3 -11 381.095 164.494   3
   0   3  12 138.846 103.323   6
   0  -3 -12 351.995 150.820   3
   0  -3 -12 312.751 120.287   4
   0  -3 -13 509.137 187.071   3
   0  -3 -13 220.294 133.407   4
   0   3  13 447.616 179.058   6
   0   3  14 8281.28 338.551  17
   0   3  14 7555.11 610.961   6
   0  -3 -14 8142.41 368.274  10
   0  -3 -14 8309.93 570.756   3
   0  -3 -14 7541.11 555.027   4
   0  -3 -14 7905.35 369.190  19
   0  -3 -14 7969.57 369.316  18
   0   3  15 7875.13 332.042  17
   0  -3 -15 7796.35 564.603   4
   0  -3 -15 7803.33 372.058  19
   0   3  15 7419.98 630.439   6
   0  -3 -15 7157.89 320.545   8
   0  -3 -15 7754.10 369.063  10
   0  -3 -16 1744.89 166.118   8
   0   3  16 1510.71 154.542  17
   0  -3 -16 1688.35 189.123  19
   0  -3 -16 1516.51 184.100  10
   0  -3 -17 4496.61 256.145   8
   0  -3 -17 4861.07 308.110  10
   0   3  17 4175.48 250.195  17
   0  -3 -17 4412.86 297.017  19
   0  -3 -18 9904.16 369.569   8
   0  -3 -18 10006.1 438.316  10
   0   3  18 9604.46 382.479  17
   0  -3 -18 10023.3 441.374  19
   0   3  19 587.550 104.210  17
   0  -3 -19 464.107 120.375  10
   0  -3 -19 565.583 130.071  19
   0  -3 -19 577.559 99.9609   8
   0   3  20 212.240 76.4740  17
   0  -3 -20 361.869 110.208  19
   0  -3 -20 279.050 100.326  10
   0  -3 -20 230.812 77.5386   8
   0  -3 -21 1554.33 153.226  19
   0   3  21 1426.98 123.035  17
   0  -3 -21 1608.17 160.480  10
   0   3  22 217.275 53.6968  17
   0  -3 -22 335.406 88.0186  19
   0  -3 -22 262.524 69.0120  12
   0  -3 -23 1081.77 86.5475  12
   0  -3 -23 1168.03 100.872  19
   0   4 -25 15.4408 29.7965  14
   0   4 -25 76.5024 43.6176  19
   0   4 -24 1983.35 129.895  14
   0   4 -24 1924.88 105.130  12
   0   4 -24 1986.33 145.655  19
   0  -4  24 1910.70 118.830  13
   0   4 -23 67.3801 60.4331  14
   0   4 -23 15.9563 49.9909  12
   0   4 -23 106.465 65.2848  19
   0   4 -22 4039.65 199.047  12
   0   4 -22 4115.52 233.727  14
   0   4 -22 3966.34 252.463  19
   0   4 -21 327.027 92.8448  14
   0   4 -21 378.586 87.3218  12
   0   4 -21 296.412 116.155  19
   0   4 -20 1647.37 179.695  14
   0   4 -20 1704.71 188.215  19
   0   4 -20 1613.24 147.638  12
   0   4 -19 12438.6 408.537  12
   0   4 -19 12194.0 467.469  14
   0   4 -19 12007.5 495.818  19
   0   4 -19 11562.4 414.377   8
   0   4 -18 17053.5 554.258  14
   0   4 -18 15258.1 494.470   8
   0   4 -18 16308.7 581.072  19
   0   4 -17 303.767 98.0086  19
   0  -4  17-14.4858 155.493   6
   0   4 -17 131.401 93.5843  14
   0   4 -17 53.7708 157.175   4
   0   4 -17 218.652 87.8886   8
   0   4 -16 563.547 100.018   8
   0   4 -16 571.735 116.346  14
   0   4 -16 631.177 120.046  19
   0   4 -16 390.623 149.863   4
   0  -4  16 555.078 174.403   6
   0   4 -15 3310.02 390.816   4
   0  -4  15 2848.23 393.769   6
   0  -4  14 2659.87 367.669   6
   0   4 -14 1955.21 285.790   4
   0  -4  13 1161.75 156.073  21
   0  -4  13 1040.28 229.349   6
   0   4 -13 1283.44 228.649   4
   0   4 -12 3796.00 353.850   4
   0  -4  12 4070.76 278.804  21
   0  -4  12 3812.22 389.545   6
   0   4 -11 685.879 161.551   1
   0   4 -11 574.807 145.073   4
   0  -4  11 651.877 166.526   6
   0  -4  11 725.345 120.473  21
   0  -4  10 34687.4 880.567  21
   0   4 -10 36480.9 1057.00   4
   0   4 -10 36021.7 1157.27   2
   0   4 -10 38090.7 1015.83   1
   0  -4  10 34729.6 1130.79   6
   0  -4   9 63002.8 1558.20   6
   0   4  -9 67089.1 1463.69   4
   0  -4   9 67184.8 1333.39  21
   0   4  -9 67411.3 1598.25   2
   0   4  -9 67297.9 1374.79   1
   0   4  -8 132.053 68.6733   1
   0  -4   8 189.960 86.2763  21
   0   4  -8 105.930 83.1245   2
   0  -4   8 228.756 102.066   6
   0  -4   7 9903.26 468.228   6
   0   4  -7 9663.92 464.002   2
   0   4  -7 10020.8 412.594   4
   0  -4   7 10443.8 411.317  21
   0   4  -7 9879.04 358.577   1
   0   4  -6 3909.76 204.951   1
   0  -4   6 3671.41 270.970   6
   0   4  -6 4104.46 278.545   2
   0  -4   6 3728.01 244.133  21
   0   4  -6 3882.56 226.701   4
   0   4  -5 1421.83 121.809   1
   0  -4   5 1550.05 156.135  21
   0   4  -5 1379.06 161.736   2
   0  -4   5 1471.94 80.5370   3
   0   4  -5 1523.19 127.764   4
   0  -4   5 1550.10 170.629   6
   0   4  -4 5041.76 276.427   2
   0  -4   4 5210.89 287.311   6
   0  -4   4 5158.80 166.571   3
   0   4  -4 5061.51 221.877   1
   0  -4   4 5231.39 282.615  21
   0   4  -4 5195.10 209.114   4
   0  -4   3 66143.1 1263.39   6
   0   4  -3 66247.5 1246.83   2
   0  -4   3 66676.5 1036.50   3
   0   4  -3 66052.3 1043.10   4
   0  -4   3 69830.5 1280.75  21
   0  -4   2 47149.8 821.181   3
   0  -4   2 48316.4 983.086   6
   0  -4   2 50325.6 1000.20  21
   0   4  -2 46905.3 747.182   4
   0   4  -2 48041.6 967.500   2
   0   4  -1 71139.3 1022.23   4
   0  -4   1 72261.1 1190.47   3
   0  -4   0 223324. 3253.51   3
   0   4   0 219457. 3260.24   2
   0  -4   0 223533. 3260.55  21
   0  -4  -1 156768. 2314.20  21
   0  -4  -1 157762. 2464.96   3
   0  -4  -2 6591.33 370.757   3
   0  -4  -2 5941.12 237.543  21
   0   4   3 137001. 2371.79  22
   0  -4  -3 142473. 2060.11  21
   0   4   4 42742.4 1103.46  22
   0   4   4 38438.9 985.097   5
   0  -4  -4 47702.7 1235.02   3
   0  -4  -4 43394.0 695.141  21
   0   4   5 215.359 98.7519  22
   0   4   5 295.820 76.1567   5
   0  -4  -6 5159.74 408.656   3
   0   4   6 4227.94 232.587   5
   0   4   6 4227.36 360.061  22
   0   4   7 13485.6 405.736   5
   0  -4  -7 15102.3 728.300   3
   0   4   8 500.863 140.523   6
   0  -4  -8 865.056 197.826   3
   0   4   9 3040.06 333.007   6
   0  -4  -9 3210.28 343.458   3
   0   4  10 13824.9 742.621   6
   0  -4 -10 14418.7 754.757   3
   0  -4 -11 167.528 160.952   3
   0  -4 -11 276.866 118.781   4
   0   4  11 224.217 137.886   6
   0  -4 -12 407.316 161.378   3
   0   4  12 625.686 183.974   6
   0  -4 -12 716.724 186.268   4
   0  -4 -13 20339.0 880.892   4
   0  -4 -13 21544.9 957.605   3
   0   4  13 19569.9 990.848   6
   0  -4 -14 3488.59 207.384   8
   0  -4 -14 3777.97 257.024  18
   0  -4 -14 4025.83 398.777   3
   0  -4 -14 3807.52 196.319  15
   0   4  14 3883.54 237.538  17
   0  -4 -14 3840.56 263.701  10
   0   4  14 3835.71 447.274   6
   0  -4 -14 3293.30 357.656   4
   0  -4 -14 3933.20 265.507  19
   0  -4 -15 2632.69 226.191  19
   0  -4 -15 2616.03 233.341  10
   0   4  15 2158.72 193.916  17
   0  -4 -15 2246.69 174.885   8
   0  -4 -15 2178.68 215.721  18
   0  -4 -16 67.3099 96.0124  10
   0   4  16 35.5311 81.3735  17
   0  -4 -16 181.595 101.430  19
   0  -4 -16 199.066 89.9577   8
   0   4  17 19736.9 582.975  17
   0  -4 -17 20264.9 644.590  10
   0  -4 -17 18734.6 533.506   8
   0  -4 -17 20500.8 653.540  19
   0  -4 -18 61.5742 70.2100   8
   0  -4 -18-34.2875 92.0766  10
   0   4  18 19.7079 74.8469  17
   0  -4 -18-120.152 108.839  19
   0  -4 -19 5177.30 296.866  10
   0   4  19 4558.86 248.764  17
   0  -4 -19 4681.99 224.169   8
   0  -4 -19 5049.11 299.903  19
   0   4  20 4333.06 224.872  17
   0  -4 -20 4215.42 256.494  19
   0  -4 -20 4216.09 256.116  10
   0  -4 -20 4145.08 191.933   8
   0   4  21 141.568 56.5199  17
   0  -4 -21 316.100 91.2102  10
   0  -4 -21 205.707 74.5263  19
   0  -4 -22 77.4120 56.4489  19
   0  -4 -22 127.659 53.1295  12
   0   4  22 173.576 49.1786  17
   0  -5  25 335.867 42.5878  13
   0   5 -25 371.137 52.6718  14
   0  -5  24 564.269 70.5834  13
   0   5 -24 629.297 79.6203  14
   0   5 -24 621.451 89.9600  19
   0   5 -23 2193.94 166.023  14
   0  -5  23 2262.10 151.753  13
   0   5 -23 2054.34 116.515  12
   0   5 -23 2313.25 175.888  19
   0   5 -22 144.306 51.4782  12
   0   5 -22 133.564 84.5297  19
   0   5 -22 221.856 87.5055  14
   0   5 -21 6592.38 259.576  12
   0   5 -21 7029.43 352.325  19
   0   5 -21 7009.00 327.385  14
   0   5 -20 5542.66 250.837  12
   0   5 -20 5551.15 306.861  14
   0   5 -20 5347.37 323.375  19
   0   5 -19 1109.73 163.012  19
   0   5 -19 1031.67 156.433  14
   0   5 -19 1010.90 120.045  12
   0   5 -18 571.064 135.852  19
   0   5 -18 619.893 102.332  12
   0   5 -18 660.888 123.620  14
   0   5 -17 1389.57 176.056  19
   0   5 -17 1207.00 129.908   8
   0   5 -17 1024.09 155.843  14
   0   5 -17 1194.71 134.474  11
   0   5 -17 1262.10 123.111  12
   0   5 -16 5715.11 282.896  11
   0   5 -16 5751.20 275.603   8
   0   5 -16 5769.28 324.307  19
   0  -5  16 6332.94 599.594   6
   0   5 -16 6325.02 543.160   4
   0   5 -16 5940.88 323.687  14
   0  -5  15 2141.80 345.898   6
   0   5 -15 1681.42 282.242   4
   0  -5  14 17605.2 953.266   6
   0   5 -14 18820.6 877.442   4
   0   5 -13 17244.0 803.313   4
   0  -5  13 17532.4 906.217   6
   0  -5  13 17874.9 656.355  21
   0   5 -12 1799.72 255.927   4
   0  -5  12 1780.49 283.355   6
   0  -5  12 1696.43 199.530  21
   0  -5  11 14282.2 570.458  21
   0   5 -11 14420.7 663.208   4
   0   5 -11 14751.1 765.013   2
   0  -5  11 13714.6 729.167   6
   0   5 -10 30984.9 957.629   4
   0  -5  10 30056.1 863.094  21
   0   5 -10 30208.0 853.653   1
   0  -5  10 30546.6 1061.81   6
   0   5 -10 31640.0 1088.22   2
   0   5  -9 14097.4 660.065   2
   0  -5   9 13049.3 528.041  21
   0   5  -9 13986.0 568.132   4
   0   5  -9 13504.7 495.146   1
   0  -5   9 12799.1 634.096   6
   0   5  -8 158.593 69.5282   1
   0   5  -8 74.9845 82.0143   2
   0  -5   8 279.617 98.7865  21
   0   5  -8 79.4166 56.6121   4
   0  -5   8 157.951 83.0614   6
   0   5  -7 38716.7 841.119   1
   0  -5   7 41100.5 993.804  21
   0   5  -7 40562.0 926.226   4
   0   5  -7 40071.2 1079.13   2
   0  -5   7 38111.0 1063.52   6
   0   5  -6 3596.68 219.707   4
   0   5  -6 3777.32 212.721   1
   0  -5   6 4373.33 285.293  21
   0  -5   6 3621.90 280.062   6
   0   5  -6 3976.37 290.482   2
   0   5  -5 24677.9 608.056   1
   0   5  -5 24122.4 570.864   4
   0  -5   5 23803.8 741.181   6
   0   5  -5 23725.0 726.121   2
   0  -5   5 24737.1 479.203   3
   0  -5   5 25604.7 729.833  21
   0  -5   4 127372. 2118.39  21
   0   5  -4 119311. 1811.30   4
   0  -5   4 119981. 2128.23   6
   0   5  -4 121102. 2101.91   2
   0  -5   4 121183. 1781.14   3
   0  -5   3 878.223 86.6833   3
   0  -5   3 896.756 129.141   6
   0   5  -3 863.348 129.191   2
   0   5  -3 862.191 71.0386   4
   0  -5   3 744.745 121.059  21
   0  -5   2 15433.7 416.764   3
   0   5  -2 15009.0 518.884   2
   0   5  -2 14971.7 317.096   4
   0  -5   2 16481.0 540.647  21
   0  -5   1 12267.7 454.493  21
   0  -5   1 12298.4 395.407   3
   0   5  -1 12257.1 455.907   2
   0  -5   0 9255.78 378.895  21
   0   5   0 8783.60 383.928   2
   0  -5   0 9537.08 375.078   3
   0  -5  -1 2826.20 222.593   3
   0   5   1 2223.29 199.271   2
   0  -5  -1 2449.18 178.962  21
   0  -5  -2 33789.7 709.552  21
   0   5   2 31278.0 794.737  22
   0  -5  -2 33362.5 906.491   3
   0  -5  -3 1316.28 107.943  21
   0  -5  -3 1408.02 204.006   3
   0   5   4 18340.0 697.688  22
   0  -5  -4 19955.4 774.927   3
   0  -5  -4 19244.5 414.021  21
   0   5   5 13300.1 635.520  22
   0   5   5 13406.4 536.141   5
   0  -5  -5 14984.5 695.069   3
   0   5   6 171.477 83.9377   5
   0   5   6 120.372 92.7389  22
   0  -5  -6 255.230 150.776   3
   0  -5  -7 4276.07 390.201   3
   0   5   7 3690.41 230.680   5
   0  -5  -8 70.8697 129.200   3
   0   5   8 114.654 95.6486   6
   0   5   9 1381.94 233.466   6
   0  -5  -9 1665.21 256.878   3
   0   5  10 5134.22 478.032   6
   0  -5 -10 4958.66 448.033   3
   0  -5 -10 5129.36 375.636   4
   0   5  11 7633.51 595.079   6
   0  -5 -11 8081.26 496.356   4
   0  -5 -11 8855.88 613.211   3
   0  -5 -12 9671.32 561.968   4
   0   5  12 8936.24 664.687   6
   0  -5 -12 9317.33 640.579   3
   0   5  13 5832.80 540.529   6
   0  -5 -13 6593.29 337.384  10
   0  -5 -13 6350.13 332.429  19
   0  -5 -13 6589.17 536.963   3
   0  -5 -13 5845.40 262.324  15
   0  -5 -13 6138.02 265.386   8
   0  -5 -13 6914.02 351.768  18
   0  -5 -14 14753.0 541.328  18
   0  -5 -14 13977.9 429.301   8
   0  -5 -14 15330.9 536.495  10
   0   5  14 14686.8 876.524   6
   0  -5 -14 15242.3 545.487  19
   0  -5 -14 14316.1 419.508  15
   0  -5 -14 14824.5 800.861   3
   0   5  14 15106.7 509.592  17
   0  -5 -15 745.924 148.035  18
   0  -5 -15 863.443 148.989  19
   0   5  15 767.170 130.185  17
   0  -5 -15 752.033 103.353   8
   0  -5 -15 747.141 141.868  10
   0   5  16 557.363 113.554  17
   0  -5 -16 554.804 127.367  19
   0  -5 -16 882.975 156.432  10
   0  -5 -16 574.853 98.2788   8
   0  -5 -17 466.010 130.291  19
   0   5  17 495.091 112.622  17
   0  -5 -17 388.777 121.114  10
   0  -5 -17 341.756 88.3634   8
   0  -5 -18 2047.46 196.100  10
   0   5  18 2236.87 186.508  17
   0  -5 -18 1945.13 194.289  19
   0  -5 -18 1929.96 138.996   8
   0   5  19 461.848 94.5990  17
   0  -5 -19 454.151 105.852  19
   0  -5 -19 451.031 108.900  10
   0  -5 -19 556.670 83.7558   8
   0  -5 -20 1141.95 138.289  10
   0   5  20 980.461 113.150  17
   0  -5 -20 1215.52 136.746  19
   0  -5 -21 1095.27 97.8322  12
   0  -5 -21 1116.00 117.252  10
   0  -5 -21 937.533 109.378  19
   0   5  21 1023.62 95.6973  17
   0   5  22 47.7155 34.8215  17
   0  -5 -22-58.3837 41.0838  12
   0  -5 -22 24.0516 41.6367  19
   0   6 -24 139.375 54.5468  14
   0  -6  24 253.007 56.8109  13
   0   6 -23 221.733 75.4276  14
   0   6 -23 277.689 80.7582  19
   0  -6  23 260.634 73.0379  13
   0   6 -22-83.7376 76.4563  14
   0  -6  22 68.4931 68.3734  13
   0   6 -22 107.273 77.7766  19
   0   6 -21 3360.15 243.613  19
   0   6 -21 3986.07 247.616  14
   0   6 -20 1746.43 181.345  14
   0   6 -20 1615.92 187.490  19
   0   6 -19 37.9704 69.8768  11
   0   6 -19 1.02513 94.6223  14
   0   6 -19-62.7806 92.6979  19
   0   6 -18 1527.97 154.403  11
   0   6 -18 1378.46 173.039  14
   0   6 -18 1284.05 173.916  19
   0   6 -17 1211.29 148.861  11
   0   6 -17 1069.92 159.305  14
   0   6 -17 1048.25 151.619  19
   0   6 -16 694.261 128.476  11
   0   6 -16 512.406 115.987  19
   0   6 -16 461.903 110.545  14
   0   6 -16 590.391 196.858   4
   0  -6  16 610.904 231.955   6
   0   6 -15 1174.00 146.749  19
   0   6 -15 1251.26 256.581   4
   0   6 -15 1260.43 141.941  11
   0  -6  15 1324.13 285.312   6
   0   6 -15 1333.39 149.838  14
   0  -6  14 677.448 137.270  21
   0   6 -14 838.030 203.465   4
   0  -6  14 811.636 227.745   6
   0  -6  13 9094.06 492.197  21
   0  -6  13 8513.50 641.176   6
   0   6 -13 9236.48 577.314   4
   0  -6  12 99.6802 149.099   6
   0   6 -12 83.5643 111.139   4
   0   6 -12 302.708 141.425   2
   0  -6  12 91.3189 82.9935  21
   0  -6  11 13888.2 607.050  21
   0   6 -11 15550.7 681.981   4
   0   6 -11 15341.0 787.969   2
   0  -6  11 14670.5 777.820   6
   0  -6  10 19042.3 852.879   6
   0   6 -10 20063.8 745.576   4
   0   6 -10 20732.8 886.680   2
   0  -6  10 20753.7 744.656  21
   0   6  -9 165.844 97.1894   4
   0  -6   9 274.517 113.366   6
   0   6  -9 280.477 109.346   2
   0  -6   9 308.121 109.586  21
   0   6  -8 1053.04 133.074   1
   0   6  -8 1231.19 153.664   4
   0  -6   8 1350.04 188.992  21
   0   6  -8 1285.89 209.781   2
   0  -6   8 1088.65 194.612   6
   0   6  -7 716.342 105.829   4
   0  -6   7 780.929 137.876  21
   0  -6   7 556.383 147.233   6
   0   6  -7 568.608 96.0994   1
   0   6  -7 665.767 146.011   2
   0  -6   6 18744.8 662.866  21
   0   6  -6 17491.8 501.994   4
   0   6  -6 17493.4 678.481   2
   0  -6   6 17675.8 688.479   6
   0   6  -6 17492.3 533.885   1
   0   6  -5 25900.1 807.099   2
   0  -6   5 26864.2 796.644  21
   0   6  -5 25244.2 583.122   4
   0  -6   5 26242.9 547.301   3
   0   6  -5 26890.7 690.612   1
   0  -6   5 26142.1 836.404   6
   0   6  -4 3434.93 161.159   4
   0  -6   4 3570.61 270.071  21
   0   6  -4 3268.85 263.990   2
   0  -6   4 3469.79 277.142   6
   0  -6   4 3544.06 181.205   3
   0   6  -3 379.755 108.381   2
   0  -6   3 333.127 64.8661   3
   0   6  -3 445.725 54.5565   4
   0  -6   3 436.887 104.205  21
   0  -6   2 5584.32 327.074  21
   0   6  -2 5972.09 343.457   2
   0  -6   2 5986.98 273.450   3
   0  -6   1 766.905 120.850  21
   0  -6   1 913.531 118.452   3
   0   6  -1 614.820 117.580   2
   0   6   0 2292.43 217.064   2
   0  -6   0 2232.74 199.300   3
   0  -6   0 2336.95 201.057  21
   0  -6  -1 22570.5 703.160   3
   0  -6  -1 21634.6 611.397  21
   0   6   1 21642.4 704.403   2
   0  -6  -2 19307.0 692.814   3
   0   6   2 17834.2 608.170  22
   0  -6  -2 19121.6 530.049  21
   0   6   2 17338.6 638.288   2
   0  -6  -3 1105.57 182.595   3
   0  -6  -3 1158.49 113.367  21
   0   6   3 801.297 160.539  22
   0   6   3 942.595 161.978   2
   0  -6  -4 3564.05 322.393   3
   0   6   4 3254.81 305.406  22
   0   6   4 3327.14 284.806   2
   0   6   4 3414.86 304.911   5
   0  -6  -5 6759.20 479.341   3
   0   6   5 6439.36 442.013  22
   0   6   5 6242.81 396.677   5
   0   6   6 141.914 94.5559   5
   0   6   6 113.007 115.062  22
   0  -6  -6 58.4022 112.975   3
   0  -6  -7 4213.39 404.396   3
   0  -6  -8 4755.35 430.425   3
   0   6   8 4007.45 406.523   6
   0  -6  -9 2310.00 333.077   3
   0   6   9 1984.20 308.213   6
   0  -6 -10 3170.53 379.612   3
   0   6  10 2819.07 369.657   6
   0   6  11 19634.2 996.928   6
   0  -6 -11 21965.5 1004.48   3
   0  -6 -12 43562.0 994.940  19
   0  -6 -12 41986.0 1455.80   3
   0   6  12 41076.7 1513.90   6
   0  -6 -12 41033.1 844.796  15
   0  -6 -12 42534.0 976.158  10
   0  -6 -12 42691.8 1000.99  18
   0  -6 -13 497.752 181.103   3
   0  -6 -13 175.627 103.085  18
   0  -6 -13 179.913 81.6781  19
   0   6  13 86.3207 124.747   6
   0  -6 -13 434.405 116.705  10
   0  -6 -13 320.334 88.8940  15
   0  -6 -14 9827.40 349.976  15
   0  -6 -14 9937.13 434.625  10
   0  -6 -14 10392.0 448.812  19
   0  -6 -14 10544.9 463.571  18
   0   6  14 10921.5 434.852  17
   0  -6 -15 5163.19 323.651  18
   0  -6 -15 4750.13 225.757   8
   0  -6 -15 5312.25 318.123  10
   0  -6 -15 5293.56 322.686  19
   0   6  15 5514.79 307.128  17
   0  -6 -16 271.665 98.9696  19
   0  -6 -16 335.070 78.6784   8
   0  -6 -16 383.452 113.234  10
   0   6  16 290.174 105.219  17
   0   6  17 67.9335 89.3363  17
   0  -6 -17 74.9467 85.1256  19
   0  -6 -17 144.982 61.1879   8
   0  -6 -17 97.4890 91.6448  10
   0  -6 -18 4016.20 257.790  19
   0  -6 -18 3722.83 249.877  10
   0   6  18 3744.84 223.591  17
   0  -6 -18 3587.78 168.128   8
   0  -6 -19 704.562 116.405  10
   0   6  19 567.134 95.9940  17
   0  -6 -19 634.265 114.328  19
   0  -6 -20 508.717 71.9989  12
   0   6  20 483.187 78.9020  17
   0  -6 -20 605.495 97.7986  10
   0  -6 -20 391.685 80.6780  19
   0  -6 -21 503.117 71.4797  19
   0  -6 -21 403.682 56.1874  12
   0   6  21 459.721 66.9515  17
   0  -7  24 894.980 81.1861  13
   0   7 -24 780.187 87.0474  14
   0   7 -23 290.337 75.5420  14
   0  -7  23 310.346 73.7962  13
   0  -7  22 2820.34 180.816  13
   0   7 -22 2645.39 191.900  14
   0   7 -22 2748.73 204.043  19
   0  -7  21 852.715 125.394  13
   0   7 -21 871.469 139.295  14
   0   7 -21 782.033 94.8138  11
   0   7 -21 786.206 133.380  19
   0   7 -20 283.072 102.997  14
   0   7 -20 293.610 106.594  19
   0   7 -20 335.059 92.2019  11
   0   7 -19 102.570 79.4887  19
   0   7 -19 71.8265 75.8636  11
   0   7 -19 187.017 109.109  14
   0   7 -18 1673.86 193.839  19
   0   7 -18 1731.75 169.096  11
   0   7 -18 1583.15 188.054  14
   0   7 -17 1243.14 166.356  19
   0   7 -17 1277.55 158.770  11
   0   7 -17 1273.48 169.765  14
   0   7 -16 15656.7 559.567  19
   0   7 -16 17112.0 838.719   4
   0   7 -16 16999.8 540.879  11
   0   7 -16 17398.6 574.147  14
   0   7 -15 11485.9 447.538  14
   0   7 -15 9536.57 419.781  19
   0   7 -15 11288.3 669.054   4
   0   7 -15 11282.2 427.540  11
   0  -7  15 10493.0 779.845   6
   0   7 -14 936.570 210.615   4
   0   7 -14 1057.65 141.946  14
   0  -7  14 974.713 170.544  21
   0  -7  14 906.494 235.791   6
   0  -7  13 2705.83 365.930   6
   0  -7  13 2789.20 288.035  21
   0   7 -13 2683.67 309.898   4
   0   7 -12 1446.99 264.671   2
   0  -7  12 1169.30 193.871  21
   0   7 -12 1313.64 206.979   4
   0  -7  12 1031.60 235.622   6
   0  -7  11 7729.69 471.596  21
   0   7 -11 7343.21 562.911   2
   0   7 -11 8073.09 472.529   4
   0  -7  11 6741.59 544.309   6
   0  -7  10 9488.83 522.077  21
   0   7 -10 9803.69 620.864   2
   0   7 -10 9934.39 491.065   4
   0  -7  10 9421.72 615.081   6
   0   7  -9 3597.75 268.601   4
   0   7  -9 3845.36 363.705   2
   0  -7   9 3873.82 378.079   6
   0  -7   9 3642.24 321.817  21
   0   7  -8 246.955 73.7081   4
   0  -7   8 205.213 115.815   6
   0  -7   8 444.189 131.177  21
   0   7  -8 305.804 131.072   2
   0   7  -7 13751.5 463.003   4
   0  -7   7 15145.8 632.558  21
   0  -7   7 14484.7 683.609   6
   0   7  -7 13882.1 656.975   2
   0   7  -7 14436.6 506.551   1
   0   7  -6 23331.7 585.370   4
   0   7  -6 24129.9 861.044   2
   0   7  -6 23880.9 693.145   1
   0  -7   6 24968.1 892.891   6
   0  -7   5 8422.46 296.488   3
   0   7  -5 7853.32 460.461   2
   0  -7   5 7448.45 455.949   6
   0  -7   5 7828.64 437.622  21
   0  -7   4 49383.4 1203.41  21
   0   7  -4 47268.3 1212.80   2
   0  -7   4 47508.8 939.958   3
   0  -7   3 90940.3 1781.05  21
   0  -7   3 87002.6 1526.93   3
   0   7  -3 88240.4 1802.16   2
   0   7  -2 13022.7 563.997   2
   0  -7   2 12890.6 549.318  21
   0  -7   2 12845.4 453.102   3
   0   7  -1 124.905 110.572   2
   0  -7   1 56.3752 73.6633  21
   0  -7   1 306.325 85.3841   3
   0  -7   0 28525.6 810.036   3
   0   7   0 28512.2 880.185   2
   0  -7   0 29396.9 805.978  21
   0  -7  -1 93162.3 1673.90  21
   0  -7  -1 91708.5 1807.71   3
   0   7   1 87966.8 1836.39   2
   0   7   2 761.717 145.564  22
   0  -7  -2 894.386 162.713   3
   0   7   2 908.978 158.494   2
   0  -7  -2 837.473 119.713  21
   0   7   3 1686.50 220.944   2
   0  -7  -3 1940.48 239.937   3
   0  -7  -3 1850.93 149.465  21
   0   7   3 1527.27 205.916  22
   0   7   3 1335.95 227.013   5
   0   7   4 12033.2 622.892   5
   0  -7  -4 13701.7 666.462   3
   0   7   4 12635.5 610.652   2
   0   7   4 12183.1 597.166  22
   0   7   5 3716.54 339.864  22
   0  -7  -5 4771.29 402.640   3
   0   7   5 3908.48 348.293   2
   0   7   5 4580.36 362.554   5
   0   7   6 5393.44 368.847   5
   0   7   6 5255.38 420.034   2
   0  -7  -6 6192.20 482.097   3
   0  -7  -7 45004.2 1423.31   3
   0   7   7 39077.3 1277.42   2
   0  -7  -8 223.217 164.492   3
   0   7   8 294.858 145.276   6
   0  -7  -9 1175.41 245.506   3
   0   7   9 1066.89 230.399   6
   0  -7 -10 2688.74 372.179   3
   0   7  10 2271.53 342.470   6
   0  -7 -11 2583.74 179.548  15
   0   7  11 2729.33 371.356   6
   0  -7 -11 3191.37 234.742  10
   0  -7 -11 3306.25 402.580   3
   0  -7 -11 2912.25 230.788  19
   0  -7 -11 2990.12 242.001  18
   0  -7 -12 13662.2 524.229  18
   0   7  12 12778.8 816.286   6
   0  -7 -12 13770.7 807.451   3
   0  -7 -12 12461.7 406.087  15
   0  -7 -12 13104.6 505.681  19
   0  -7 -12 13278.9 497.922  10
   0  -7 -13 7518.49 310.041  15
   0  -7 -13 8714.09 416.591  18
   0  -7 -13 8250.54 395.950  10
   0  -7 -13 8430.74 401.766  19
   0  -7 -14 11067.4 458.596  10
   0   7  14 10657.3 438.985  17
   0  -7 -14 10836.6 469.300  18
   0  -7 -14 10295.1 454.844  19
   0  -7 -15 769.679 155.073  18
   0  -7 -15 692.918 132.954  19
   0  -7 -15 734.552 138.041  10
   0   7  15 912.480 141.716  17
   0  -7 -16 63.3864 82.7367  19
   0   7  16 120.585 91.8770  17
   0  -7 -16-91.1432 91.0304  10
   0  -7 -17 420.508 117.745  10
   0  -7 -17 564.549 117.684  19
   0   7  17 630.056 114.070  17
   0  -7 -18 112.762 76.0748  10
   0  -7 -18 44.0804 69.7218  19
   0   7  18 45.8578 62.6847  17
   0   7  19 597.883 90.0960  17
   0  -7 -19 522.776 97.0490  10
   0  -7 -19 603.540 100.354  19
   0  -7 -20 248.607 47.9499  12
   0   7  20 198.010 57.2528  17
   0  -7 -20 154.437 56.3187  19
   0  -7 -20 158.141 60.8935  10
   0  -8  24 103.831 44.8778  13
   0   8 -24 161.261 51.3038  14
   0   8 -23 138.234 64.7213  14
   0  -8  23 130.466 59.3727  13
   0   8 -22 2188.15 166.826  14
   0   8 -22 1779.60 111.977  11
   0  -8  22 2153.76 160.867  13
   0   8 -21 1036.76 137.229  14
   0   8 -21 1076.33 108.619  11
   0  -8  21 1265.94 142.824  13
   0   8 -20 2262.90 204.926  19
   0   8 -20 2277.25 167.666  11
   0  -8  20 2423.23 195.186  13
   0   8 -20 2043.32 195.384  14
   0   8 -19 6490.01 338.165  14
   0   8 -19 5767.58 288.518  11
   0   8 -19 6222.77 347.300  19
   0  -8  19 6708.96 335.897  13
   0   8 -18 292.760 107.827  19
   0  -8  18 89.0754 97.3313  13
   0   8 -18 229.681 111.033  14
   0   8 -18 222.337 93.8234  11
   0   8 -17 2045.19 213.789  19
   0  -8  17 2125.81 200.758  13
   0   8 -17 2025.08 195.174  11
   0   8 -17 1831.79 195.999  14
   0   8 -16 538.381 127.435  11
   0   8 -16 437.119 107.591  19
   0   8 -16 397.586 109.432  14
   0   8 -15 2546.76 221.448  14
   0   8 -15 1809.76 186.878  19
   0  -8  15 2194.53 271.829  21
   0  -8  15 1807.17 338.379   6
   0   8 -15 2124.14 199.510  11
   0  -8  14 304.683 150.254   6
   0   8 -14 439.799 103.172  19
   0   8 -14 576.007 126.016  14
   0  -8  14 258.465 137.311  21
   0   8 -14 497.135 130.406  11
   0  -8  13-161.984 159.760   6
   0  -8  13 134.290 122.228  21
   0   8 -13-50.6721 149.055   2
   0   8 -12 9674.14 693.528   2
   0  -8  12 10255.9 724.087   6
   0  -8  12 10271.5 586.331  21
   0   8 -11 4255.92 438.822   2
   0  -8  11 4797.83 398.501  21
   0  -8  11 4413.46 460.555   6
   0  -8  10 131.715 128.527   6
   0  -8  10 343.839 130.777  21
   0   8 -10 181.713 132.601   5
   0   8 -10 100.363 151.616   2
   0  -8   9 1222.83 229.625   6
   0  -8   9 1702.31 243.787  21
   0   8  -9 1526.28 267.663   2
   0  -8   8 1319.89 216.553  21
   0  -8   8 1351.20 244.970   6
   0   8  -8 1201.60 229.902   2
   0   8  -7 4326.73 378.001   2
   0  -8   7 4470.78 407.601   6
   0  -8   7 4566.78 374.240  21
   0  -8   6 8529.07 490.028  21
   0   8  -6 7135.87 487.243   2
   0   8  -6 7146.80 379.379   1
   0  -8   6 7833.07 522.073   6
   0  -8   5 32230.6 1002.05  21
   0   8  -5 32580.7 1037.99   2
   0  -8   4 28662.5 923.303  21
   0   8  -4 26952.3 919.568   2
   0  -8   4 27569.6 692.883   3
   0  -8   3 123047. 2084.39   3
   0  -8   3 124713. 2354.73  21
   0   8  -3 125154. 2406.90   2
   0   8  -2 25244.4 875.255   2
   0  -8   2 25711.5 728.134   3
   0  -8   2 27051.7 852.436  21
   0  -8   1 15820.3 622.876  21
   0  -8   1 15143.1 565.501   3
   0   8  -1 15072.3 667.247   2
   0  -8   0 42329.6 1081.63   3
   0   8   0 42196.8 1179.80   2
   0  -8   0 41370.3 1044.77  21
   0   8   1 52710.9 1374.25   2
   0  -8  -1 54642.2 1191.93  21
   0  -8  -1 53171.6 1316.84   3
   0  -8  -2 8187.69 370.523  21
   0  -8  -2 8070.72 475.562   3
   0   8   2 8236.58 498.730   2
   0   8   3 8399.57 517.733   2
   0  -8  -3 8423.12 514.011   3
   0   8   3 8287.91 564.200   5
   0  -8  -4 2533.25 292.858   3
   0   8   4 2837.83 307.456   2
   0   8   4 2058.46 286.944   5
   0  -8  -5 2954.84 328.903   3
   0   8   5 2340.53 293.691   2
   0   8   5 2968.65 313.706   5
   0   8   6 3907.08 379.145   2
   0   8   6 4689.13 361.156   5
   0  -8  -6 4523.33 428.655   3
   0   8   7 3702.44 381.167   2
   0  -8  -7 3911.02 423.201   3
   0  -8  -8 15868.2 848.398   3
   0   8   8 14496.6 843.263   6
   0   8   8 14398.3 794.258   2
   0   8   9 1843.59 308.445   6
   0   8   9 2656.93 341.466   2
   0  -8  -9 2609.07 345.121   3
   0  -8  -9 2554.32 169.634  15
   0  -8  -9 2412.00 206.360  19
   0  -8  -9 2737.21 204.069  10
   0  -8  -9 2618.91 224.465  18
   0   8  10 4442.12 456.068   2
   0  -8 -10 4812.52 303.796  18
   0  -8 -10 4715.36 285.779  10
   0  -8 -10 5121.88 492.413   3
   0   8  10 4400.89 473.697   6
   0  -8 -10 4781.62 242.353  15
   0  -8 -10 4837.10 298.685  19
   0  -8 -11 2634.89 217.183  10
   0   8  11 2499.13 373.077   6
   0   8  11 2076.78 307.000   2
   0  -8 -11 2823.36 240.243  18
   0  -8 -11 2356.98 169.217  15
   0  -8 -11 2614.56 215.850  19
   0  -8 -12 706.959 145.777  18
   0  -8 -12 641.730 128.640  19
   0  -8 -12 800.248 137.889  10
   0  -8 -12 685.180 105.051  15
   0  -8 -13 8416.44 402.962  19
   0  -8 -13 8497.24 394.623  10
   0  -8 -13 7496.52 304.873  15
   0  -8 -13 8226.16 407.651  18
   0  -8 -14 8461.25 392.797  10
   0  -8 -14 8132.50 394.990  19
   0   8  14 8278.92 378.513  17
   0  -8 -14 8524.90 413.088  18
   0   8  15 4306.44 262.776  17
   0  -8 -15 4199.55 275.249  10
   0  -8 -15 4196.38 284.337  18
   0  -8 -15 4139.83 274.603  19
   0  -8 -16 2242.20 195.722  19
   0  -8 -16 2252.00 188.502  10
   0   8  16 2531.94 191.318  17
   0   8  17 1469.54 145.653  17
   0  -8 -17 1295.75 143.268  10
   0  -8 -17 1421.17 151.498  19
   0  -8 -18 247.413 77.5005  19
   0  -8 -18 201.583 51.2497  12
   0  -8 -18 264.208 74.7349  10
   0   8  18 247.219 73.0917  17
   0   8  19 508.246 73.4855  17
   0  -8 -19 599.106 83.8971  10
   0  -8 -19 621.866 79.9582  19
   0  -8 -19 453.466 49.9177  12
   0  -9  24 140.392 37.5807  13
   0  -9  23 1379.77 108.513  13
   0   9 -23 1276.90 114.370  14
   0  -9  22 193.358 72.6370  13
   0   9 -22 120.546 71.3769  14
   0   9 -22 170.717 51.4609  11
   0  -9  21 1202.07 131.759  13
   0   9 -21 999.574 102.606  11
   0   9 -21 1216.42 145.568  14
   0   9 -20 761.013 133.046  14
   0  -9  20 887.029 132.046  13
   0   9 -20 494.793 97.3698  11
   0   9 -19 1958.12 191.737  14
   0   9 -19 1969.93 170.579  11
   0  -9  19 1983.67 190.961  13
   0  -9  18 6767.72 337.181  13
   0   9 -18 6553.19 345.287  14
   0   9 -18 6572.09 321.683  11
   0   9 -17 763.803 132.429  11
   0  -9  17 565.252 128.805  13
   0   9 -17 409.100 128.462  14
   0   9 -16 668.912 132.855  11
   0  -9  16 878.946 135.941  13
   0   9 -16 778.642 142.746  14
   0   9 -15 537.343 114.280  14
   0   9 -15 697.798 142.388  11
   0  -9  15 640.451 129.112  13
   0  -9  14 2039.79 366.079   6
   0  -9  14 2266.21 286.916  21
   0  -9  14 1824.23 184.554  13
   0   9 -14 1499.15 166.546  14
   0   9 -14 1770.27 189.014  11
   0   9 -13 4919.28 517.705   2
   0  -9  13 4762.34 273.418  13
   0   9 -13 4735.42 271.313  14
   0   9 -13 5433.86 304.299  11
   0  -9  13 4785.97 421.475  21
   0  -9  13 4388.06 501.214   6
   0  -9  12 671.555 177.308  21
   0   9 -12 435.357 118.457  11
   0   9 -12 237.479 178.102   2
   0  -9  12 439.356 102.960  13
   0  -9  12 495.071 212.191   6
   0   9 -11 13080.2 798.382   2
   0  -9  11 13308.2 698.178  21
   0  -9  11 12169.2 784.865   6
   0  -9  10 2411.26 342.928   6
   0   9 -10 2191.25 359.307   5
   0   9 -10 2220.93 340.696   2
   0  -9  10 2657.67 315.729  21
   0  -9   9 1109.85 229.656   6
   0   9  -9 879.729 218.881   2
   0   9  -9 483.064 209.045   5
   0  -9   9 826.795 193.028  21
   0  -9   8 1143.59 244.369   6
   0  -9   8 958.757 193.129  21
   0   9  -8 824.637 206.072   2
   0  -9   7 1023.35 206.835  21
   0   9  -7 873.094 205.146   2
   0  -9   6 1260.89 216.040  21
   0   9  -6 1403.90 233.856   2
   0   9  -5 1410.69 228.192   2
   0  -9   5 1247.84 216.361  21
   0  -9   4 7870.53 486.297  21
   0   9  -4 7670.69 507.750   2
   0   9  -3 326.883 125.346   2
   0  -9   3 404.058 100.001   3
   0  -9   3 462.846 135.708  21
   0   9  -2 11275.2 607.048   2
   0  -9   2 10628.8 536.845  21
   0  -9   2 11345.0 485.593   3
   0  -9   1 16717.1 637.355   3
   0   9  -1 16318.2 738.993   2
   0  -9   1 17537.3 680.205  21
   0  -9   0 46.6121 79.2012  21
   0  -9   0 5.20153 78.8802   3
   0   9   0 4.52621 129.157   5
   0   9   0 146.735 120.353   2
   0  -9  -1 7415.19 389.256  21
   0   9   1 6498.55 474.592   2
   0  -9  -1 7035.03 437.151   3
   0   9   2 4380.62 388.504   2
   0   9   2 3983.78 416.409   5
   0  -9  -2 4518.44 373.777   3
   0   9   3 1180.75 228.702   5
   0  -9  -3 1527.94 248.172   3
   0   9   3 1129.51 222.574   2
   0   9   4 497.717 170.726   2
   0  -9  -4 342.345 148.011   3
   0   9   4 322.626 142.845   5
   0   9   5 943.460 206.170   5
   0   9   5 603.079 181.906   2
   0  -9  -5 850.825 202.802   3
   0  -9  -6 821.098 230.779   3
   0   9   6 606.443 160.405   2
   0  -9  -7 4481.07 452.507   3
   0   9   7 3962.68 415.495   2
   0  -9  -7 4395.14 216.857  15
   0  -9  -7 4799.38 282.558  18
   0  -9  -8 2456.93 217.294  18
   0  -9  -8 2862.38 219.830  19
   0   9   8 2030.79 324.276   6
   0  -9  -8 2882.99 377.776   3
   0   9   8 2703.75 366.859   2
   0  -9  -8 2821.13 179.489  15
   0  -9  -8 2569.10 187.370  13
   0  -9  -8 2482.57 203.314  10
   0  -9  -9 11633.5 749.673   3
   0  -9  -9 11592.8 466.813  19
   0  -9  -9 12785.3 496.045  18
   0   9   9 11614.8 731.606   2
   0  -9  -9 12108.6 459.693  10
   0   9   9 10386.5 731.882   6
   0  -9  -9 11267.7 378.395  15
   0  -9 -10 5924.04 323.820  10
   0  -9 -10 5360.94 254.389  15
   0  -9 -10 5813.20 332.097  19
   0  -9 -10 5663.64 339.286  18
   0  -9 -11 920.357 118.210  20
   0  -9 -11 1098.75 162.716  19
   0  -9 -11 1006.95 161.977  18
   0  -9 -11 1035.17 121.392  15
   0  -9 -11 1077.39 155.768  10
   0  -9 -12 7399.56 365.184  10
   0  -9 -12 7157.43 293.382  15
   0  -9 -12 7124.25 383.575  18
   0  -9 -12 7300.11 369.583  19
   0  -9 -13 256.510 103.307  10
   0  -9 -13 49.4519 83.9980  19
   0  -9 -13 211.485 106.138  18
   0   9  14 6.15322 86.6505  17
   0  -9 -14-40.6025 85.4929  10
   0  -9 -14 17.1436 91.6108  18
   0  -9 -14 6.54562 88.0920  19
   0  -9 -15 448.939 113.566  18
   0  -9 -15 405.101 105.838  19
   0   9  15 507.468 109.456  17
   0  -9 -15 565.939 117.231  10
   0  -9 -16 277.356 82.0897  10
   0  -9 -16 383.400 93.3995  19
   0   9  16 446.994 98.1217  17
   0  -9 -17 4203.94 214.236  19
   0  -9 -17 4277.14 216.816  10
   0   9  17 4108.04 207.480  17
   0   9  18 319.989 64.1231  17
   0  -9 -18 321.671 65.3613  10
   0  -9 -18 322.606 62.9931  19
   0   9  19 29.1144 32.7503  17
   0  -9 -19 77.5305 34.5155  19
   0  -9 -19 54.3974 37.9288  10
   0 -10  23 477.860 66.6036  13
   0  10 -22 155.550 61.3973  14
   0  10 -22 172.182 49.8117  11
   0 -10  22 201.196 68.5322  13
   0  10 -21 299.611 68.8168  11
   0 -10  21 328.950 87.3516  13
   0  10 -21 301.830 86.4633  14
   0 -10  20 1107.74 138.023  13
   0  10 -20 1286.68 130.165  11
   0  10 -20 1068.42 133.885  14
   0  10 -19 50.3443 72.7692  11
   0  10 -19 88.7693 93.5608  14
   0 -10  19 102.480 101.152  13
   0  10 -18 3028.88 229.954  14
   0  10 -18 3034.26 221.709  11
   0 -10  18 2854.78 235.425  13
   0  10 -17 4083.28 269.958  14
   0 -10  17 3363.51 255.575  13
   0  10 -17 3719.04 252.093  11
   0  10 -16 208.798 105.959  11
   0  10 -16 118.722 102.164  14
   0 -10  16 261.125 112.690  13
   0 -10  15 757.557 132.559  13
   0  10 -15 809.260 149.557  11
   0  10 -15 653.386 128.242  14
   0 -10  14 657.706 127.478  13
   0  10 -14 816.079 135.956  14
   0  10 -14 696.918 134.285  11
   0  10 -13 1261.13 302.847   2
   0 -10  13 1030.19 137.176  13
   0 -10  13 990.933 256.547   6
   0 -10  13 1545.76 267.112  21
   0  10 -13 1021.76 129.562  14
   0  10 -13 1325.79 169.742  11
   0 -10  12 94.0671 108.945  21
   0 -10  12 1.88843 123.666   6
   0 -10  12 121.008 79.9237  13
   0  10 -12 97.0456 173.651   2
   0  10 -12 133.244 103.716  11
   0  10 -12-40.5713 86.4927  14
   0 -10  11 10214.9 397.978  13
   0  10 -11 11542.5 436.268  11
   0  10 -11 9803.61 375.055  14
   0 -10  11 10162.0 744.129   6
   0  10 -11 11382.4 763.889   2
   0 -10  11 11111.4 668.585  21
   0  10 -10 9901.86 722.090   5
   0  10 -10 11714.9 753.901   2
   0 -10  10 11476.6 671.433  21
   0 -10   9 561.615 171.137  21
   0  10  -9 329.862 127.309   2
   0  10  -9 492.331 227.716   5
   0  10  -8 20756.1 957.670   2
   0  10  -8 18912.4 1083.44   5
   0 -10   8 22006.0 914.804  21
   0  10  -7 9967.61 788.236   5
   0  10  -7 11611.5 706.922   2
   0 -10   7 11806.2 664.386  21
   0  10  -6 184.446 120.034   2
   0 -10   6 60.3364 96.1368  21
   0  10  -6 35.1362 173.839   5
   0  10  -5 5330.30 450.080   2
   0 -10   5 4959.38 414.464  21
   0 -10   4 169.197 119.702  21
   0  10  -4 232.875 125.735   2
   0  10  -3 1191.57 298.335   5
   0 -10   3 1424.32 232.369  21
   0  10  -3 1471.91 256.513   2
   0 -10   2 16729.5 708.609  21
   0  10  -2 16084.0 776.400   2
   0 -10   2 16333.0 620.993   3
   0 -10   1 3452.79 309.206  21
   0  10  -1 2753.92 405.537   5
   0  10  -1 3490.94 364.525   2
   0 -10   1 3189.20 282.196   3
   0  10   0 4250.66 486.968   5
   0 -10   0 5521.17 385.505   3
   0 -10   0 5364.10 360.509  21
   0  10   0 4906.25 425.040   2
   0  10   1 842.490 229.385   5
   0 -10  -1 1211.47 204.466   3
   0  10   1 1059.72 230.485   2
   0  10   2 539.299 165.660   2
   0  10   2 508.199 186.071   5
   0 -10  -2 494.494 149.557   3
   0 -10  -3 1493.59 241.120   3
   0  10   3 1258.19 239.116   5
   0  10   3 1646.03 287.944   2
   0  10   4 1823.75 286.271   2
   0  10   4 1967.29 290.349   5
   0 -10  -4 1661.99 272.519   3
   0 -10  -5 825.708 102.453   9
   0 -10  -5 606.980 122.873  18
   0  10   5 835.849 211.115   2
   0 -10  -5 716.411 196.476   3
   0  10   5 491.493 146.018   5
   0 -10  -5 649.253 88.6129  15
   0 -10  -6 8980.62 399.119  18
   0  10   6 8240.99 612.255   2
   0 -10  -6 8273.65 304.961  15
   0 -10  -6 8721.97 613.884   3
   0 -10  -6 8351.84 381.035  19
   0 -10  -6 8740.43 368.445  10
   0 -10  -6 8670.88 299.513   9
   0  10   6 8514.16 346.604  16
   0 -10  -6 7545.78 318.639  13
   0 -10  -7 156.388 98.8760  18
   0 -10  -7 28.0385 71.1691  10
   0 -10  -7 60.6232 65.8684  13
   0  10   7 1.64868 179.824   2
   0 -10  -7 152.039 91.9223  19
   0  10   7 193.901 68.2602  16
   0 -10  -7 138.157 79.7306  15
   0 -10  -7-78.6932 141.780   3
   0 -10  -8 1853.89 182.320  10
   0 -10  -8 1446.00 167.225  19
   0 -10  -8 1505.79 156.595  13
   0 -10  -8 1878.89 148.453  15
   0 -10  -8 1537.54 184.938  18
   0 -10  -9 2093.75 196.944  10
   0 -10  -9 1976.56 198.871  19
   0 -10  -9 2145.66 163.544  15
   0 -10  -9 2308.14 217.608  18
   0 -10 -10 20634.8 566.861  20
   0 -10 -10 21495.7 662.079  19
   0 -10 -10 21956.6 648.156  10
   0 -10 -10 21440.3 687.146  18
   0 -10 -10 19581.8 531.895  15
   0 -10 -11 1279.28 170.870  19
   0 -10 -11 1209.12 161.866  10
   0 -10 -11 1390.95 138.542  15
   0 -10 -11 1398.83 151.845  20
   0 -10 -11 1348.97 187.440  18
   0 -10 -12 569.838 96.6536  20
   0 -10 -12 541.477 137.594  18
   0 -10 -12 750.760 130.186  10
   0 -10 -12 593.449 123.998  19
   0  10  13 245.883 95.1809  17
   0 -10 -13 437.748 110.774  10
   0 -10 -13 408.706 106.229  19
   0 -10 -13 316.665 114.062  18
   0 -10 -14 4060.09 263.529  18
   0 -10 -14 4214.39 247.380  10
   0 -10 -14 4164.29 252.473  19
   0  10  14 4415.92 246.525  17
   0  10  15 6291.97 272.956  17
   0 -10 -15 6271.89 279.789  10
   0 -10 -15 5490.39 266.758  19
   0 -10 -15 6488.89 307.184  18
   0 -10 -16 1839.63 138.953  19
   0  10  16 1708.14 130.645  17
   0 -10 -16 1884.90 141.580  10
   0 -10 -17 1090.99 96.4941  10
   0 -10 -17 1100.75 96.1515  19
   0  10  17 1017.74 94.5375  17
   0 -11  22 903.090 91.4317  13
   0  11 -22 921.325 74.9958  11
   0  11 -21 1333.30 109.033  11
   0 -11  21 1338.48 125.995  13
   0  11 -20 101.249 67.3572  14
   0  11 -20 30.3122 63.9522  11
   0 -11  20 166.161 83.5989  13
   0  11 -19 1521.83 159.889  14
   0  11 -19 1472.88 145.005  11
   0 -11  19 1627.00 162.850  13
   0 -11  18 108.349 93.6868  13
   0  11 -18 259.411 98.6821  14
   0  11 -18 179.815 88.1865  11
   0  11 -17 1630.02 173.760  14
   0  11 -17 1860.01 187.606  11
   0 -11  17 1969.55 193.790  13
   0  11 -16 3291.32 239.524  14
   0  11 -16 3262.20 242.480  11
   0 -11  16 3211.30 251.004  13
   0  11 -15 4862.45 287.316  14
   0  11 -15 5166.24 304.669  11
   0 -11  15 4722.62 299.254  13
   0  11 -14 2116.36 193.998  14
   0  11 -14 2176.75 212.007  11
   0 -11  14 2161.55 206.043  13
   0  11 -13 406.128 97.3746  14
   0  11 -13 571.962 124.101  11
   0 -11  13 555.788 132.207  13
   0  11 -12 2246.35 209.859  11
   0  11 -12 2561.48 197.503  14
   0 -11  12 2389.34 209.371  13
   0 -11  11 250.570 99.8202  13
   0  11 -11 117.106 80.5717  20
   0  11 -11 44.0673 93.3332  11
   0  11 -11 39.5621 73.2749  14
   0  11 -10 5082.18 531.916   5
   0  11 -10 5490.79 268.483  14
   0 -11  10 5526.03 299.058  13
   0  11 -10 5339.09 292.537  20
   0 -11  10 6167.86 504.117  21
   0  11 -10 6040.63 304.775  11
   0  11 -10 5657.03 330.045  16
   0  11 -10 5630.29 545.578   2
   0  11  -9 20484.3 568.536  11
   0  11  -9 19187.0 570.203  20
   0  11  -9 19320.9 644.739  16
   0  11  -9 17610.0 1026.67   5
   0  11  -9 18427.5 958.217   2
   0 -11   9 19729.5 912.397  21
   0 -11   9 18882.1 564.440  13
   0 -11   8 637.881 183.698  21
   0  11  -8 1327.60 262.944   2
   0 -11   8 754.384 130.423  13
   0  11  -8 1142.42 317.848   5
   0  11  -7 300.336 154.359   2
   0 -11   7 227.334 121.783  21
   0  11  -7 178.766 237.360   5
   0  11  -6 351.374 221.601   5
   0  11  -6 91.7650 108.556   2
   0 -11   6 265.618 136.523  21
   0  11  -5 8076.52 579.575   2
   0  11  -5 8125.30 760.813   5
   0 -11   5 8454.96 574.785  21
   0  11  -4 1381.47 267.512   2
   0 -11   4 1238.31 220.365  21
   0  11  -4 840.829 291.897   5
   0  11  -3 16168.1 1027.52   5
   0  11  -3 14290.4 770.067   2
   0 -11   3 15175.8 722.538  21
   0 -11   2 34566.7 1096.81  21
   0  11  -2 33289.6 1203.87   2
   0  11  -2 32768.9 1460.52   5
   0  11  -1 347.868 201.604   5
   0 -11   1 580.955 151.701  21
   0  11  -1 296.195 149.965   2
   0  11   0 2099.32 288.074   2
   0 -11   0 2334.25 278.624   3
   0  11   0 2528.22 388.876   5
   0  11   1 1128.45 290.930   5
   0 -11  -1 764.895 192.918   3
   0  11   1 810.967 210.635   2
   0 -11  -2 108.175 75.2030  18
   0  11   2 184.847 92.6766  16
   0  11   2 93.3013 118.176   2
   0  11   2 169.570 136.410   5
   0 -11  -2 370.434 77.4673   9
   0 -11  -2 343.322 153.341   3
   0 -11  -3 225.292 88.3615  10
   0  11   3 249.155 168.355   2
   0 -11  -3 200.281 74.4600  13
   0 -11  -3 214.507 165.406   3
   0 -11  -3 166.004 68.4541   9
   0  11   3 499.811 176.045   5
   0 -11  -3 204.791 104.413  18
   0 -11  -3 333.997 74.8130  15
   0  11   3 266.815 109.817  16
   0  11   4 40.3676 125.291   5
   0 -11  -4 276.675 95.8531  18
   0 -11  -4 234.093 66.8065  10
   0 -11  -4 319.136 82.8160   9
   0 -11  -4 293.934 129.675   3
   0 -11  -4 426.204 101.809  13
   0  11   4 331.304 103.573  16
   0 -11  -4 399.088 81.3157  15
   0  11   4 79.6099 114.717   2
   0 -11  -5 2986.01 356.505   3
   0 -11  -5 3095.45 244.473  18
   0 -11  -5 3187.77 229.013  10
   0  11   5 3079.02 224.153  16
   0 -11  -5 3049.62 206.444  13
   0 -11  -5 3099.27 185.569  15
   0 -11  -5 3105.99 232.855  19
   0 -11  -6 2542.97 206.303  10
   0 -11  -6 2950.75 246.837  18
   0 -11  -6 2513.99 173.486  15
   0  11   6 2689.01 198.050  16
   0 -11  -6 2678.29 197.639  13
   0 -11  -6 2418.15 218.810  19
   0 -11  -7 2481.89 217.588  19
   0 -11  -7 2520.55 204.189  10
   0 -11  -7 2669.87 233.484  18
   0 -11  -7 2445.37 185.765  13
   0 -11  -7 2469.53 169.552  15
   0  11   7 2552.60 195.466  16
   0 -11  -8 48.4178 81.2745  19
   0 -11  -8 42.7250 75.5225  15
   0  11   8 191.044 77.2266  16
   0 -11  -8 175.884 94.2943  10
   0 -11  -8 176.526 92.9049  18
   0 -11  -9 12754.0 407.914  15
   0 -11  -9 13508.1 508.762  19
   0 -11  -9 13766.2 495.138  10
   0 -11  -9 14137.8 538.920  18
   0 -11 -10 64.3375 84.8588  10
   0 -11 -10 85.8295 85.2120  19
   0 -11 -10 286.153 90.3950  20
   0 -11 -10 66.9015 98.5281  18
   0 -11 -10 220.205 83.6502  15
   0 -11 -11 2169.13 164.014  20
   0 -11 -11 2368.97 200.927  10
   0 -11 -11 2175.74 212.709  18
   0 -11 -11 1722.88 183.727  19
   0  11  12 7145.85 329.745  17
   0 -11 -12 7325.86 359.355  18
   0 -11 -12 7107.80 331.244  19
   0 -11 -12 6859.03 320.906  10
   0 -11 -12 6763.24 262.912  20
   0  11  13 2198.90 174.061  17
   0 -11 -13 2515.31 206.502  18
   0 -11 -13 2140.80 176.422  19
   0 -11 -13 2277.83 173.103  10
   0 -11 -14 554.344 92.6879  10
   0 -11 -14 726.521 119.885  18
   0 -11 -14 564.963 94.8819  19
   0  11  14 572.574 98.4348  17
   0 -11 -15 115.216 58.3174  10
   0 -11 -15 121.450 57.7836  19
   0  11  15 69.9509 54.9897  17
   0 -11 -16 115.872 43.0532  19
   0  11  16 162.575 47.8565  17
   0  12 -22 520.289 52.6155  11
   0 -12  22 634.148 67.5135  13
   0  12 -21 503.891 66.4862  11
   0 -12  21 603.282 84.7211  13
   0 -12  21 540.964 70.0882  18
   0  12 -20 89.9760 51.4593  11
   0 -12  20 84.4928 68.4800  13
   0 -12  19 1401.93 147.415  13
   0  12 -19 1244.37 127.365  11
   0  12 -18 1129.29 135.397  11
   0 -12  18 1095.37 145.107  13
   0  12 -17 6545.55 307.173  11
   0 -12  17 5683.01 314.923  13
   0  12 -16 3955.51 255.027  11
   0 -12  16 3680.40 252.678  13
   0  12 -16 3580.67 237.632  14
   0 -12  15 280.434 105.159  13
   0  12 -15 420.904 103.945  14
   0  12 -15 285.102 120.732  11
   0 -12  14 936.975 152.359  13
   0  12 -14 1154.03 145.281  14
   0  12 -14 1317.79 174.691  11
   0 -12  13 417.471 122.024  13
   0  12 -13 583.241 132.282  11
   0 -12  12 85.3947 97.2297  13
   0  12 -12 120.545 92.4577  11
   0  12 -11 4444.18 269.728  11
   0  12 -11 4131.16 284.545  16
   0 -12  11 3996.85 264.636  13
   0  12 -10 10507.7 473.535  16
   0  12 -10 10805.8 412.259  11
   0 -12  10 10101.9 413.856  13
   0  12  -9 260.141 94.6462  11
   0  12  -9 227.880 132.369  16
   0  12  -9 119.370 138.964   2
   0 -12   9 64.2840 97.1744  13
   0 -12   9 94.5060 80.1643  18
   0  12  -8 1191.05 344.433   5
   0 -12   8 941.751 137.834  13
   0 -12   8 842.213 190.578  21
   0 -12   8 1173.18 147.589  18
   0  12  -8 1123.44 129.334  11
   0  12  -8 1274.51 249.583   2
   0  12  -8 1269.84 187.848  16
   0  12  -7 4953.50 244.856  11
   0 -12   7 5058.84 295.084  18
   0 -12   7 4800.43 451.569  21
   0  12  -7 5222.65 500.348   2
   0  12  -7 5062.13 338.890  16
   0  12  -7 5475.37 625.112   5
   0 -12   7 4675.00 268.121  13
   0 -12   6 6870.03 342.112  18
   0 -12   6 6300.67 519.542  21
   0  12  -6 5875.20 656.886   5
   0 -12   6 6281.25 309.075  13
   0  12  -6 5364.11 518.811   2
   0  12  -6 6597.96 273.539  11
   0  12  -6 6681.71 382.173  16
   0  12  -5 5995.79 655.876   5
   0  12  -5 5296.33 494.900   2
   0 -12   5 4980.40 270.655  13
   0 -12   5 5505.53 299.708  18
   0 -12   5 5172.04 464.403  21
   0  12  -5 5368.94 340.813  16
   0 -12   4 242.779 91.7212  18
   0  12  -4 300.029 199.352   5
   0  12  -4 109.447 135.165   2
   0 -12   4 267.693 133.607  21
   0 -12   4 226.936 77.3281  13
   0  12  -4 123.017 89.5457  16
   0  12  -3 267.036 113.717  16
   0 -12   3 199.572 93.0444  13
   0 -12   3 387.883 113.545  18
   0  12  -3 235.641 119.459   2
   0 -12   3 386.948 129.698  21
   0 -12   3 264.722 72.0665   9
   0  12  -3 210.421 158.655   5
   0 -12   2 377.237 75.1116   9
   0  12  -2 120.485 172.596   5
   0  12  -2 239.411 108.798  16
   0 -12   2 125.517 81.4406  13
   0  12  -2 235.840 177.797   2
   0 -12   2 334.973 103.026  18
   0 -12   2 151.046 79.5228  10
   0 -12   1 1572.69 146.285  13
   0  12  -1 1673.78 319.311   5
   0  12  -1 1622.35 188.757  16
   0 -12   1 1847.11 142.277   9
   0 -12   1 1732.62 179.577  18
   0 -12   1 1599.46 148.285  10
   0  12   0 5104.34 313.352  16
   0 -12   0 4878.38 259.094  10
   0  12   0 4710.81 516.389   5
   0 -12   0 4702.32 285.161  18
   0 -12   0 4734.76 257.191  13
   0 -12   0 4856.99 228.073   9
   0 -12  -1 11252.1 366.818   9
   0  12   1 11993.8 780.584   5
   0  12   1 12183.4 481.321  16
   0 -12  -1 10526.1 394.505  13
   0 -12  -1 11931.9 421.979  10
   0 -12  -1 11415.0 457.681  18
   0 -12  -2 2505.89 169.881   9
   0  12   2 2471.10 350.452   5
   0 -12  -2 2555.70 310.666   3
   0 -12  -2 2457.17 195.511  10
   0  12   2 2523.38 216.875  16
   0 -12  -2 2551.85 193.410  13
   0 -12  -2 2626.02 226.105  18
   0 -12  -3 2027.15 203.236  18
   0 -12  -3 1784.65 134.276  15
   0  12   3 1996.82 195.419  16
   0 -12  -3 1821.85 172.191  13
   0 -12  -3 1804.10 176.983  10
   0  12   4 4681.11 278.175  16
   0 -12  -4 4608.36 218.637  15
   0 -12  -4 4629.28 303.215  18
   0 -12  -4 3925.62 243.768  13
   0 -12  -4 4701.39 273.182  10
   0 -12  -5 2385.78 197.147  10
   0 -12  -5 2108.45 206.135  19
   0  12   5 2207.88 196.432  16
   0 -12  -5 2111.78 179.890  13
   0 -12  -5 2352.59 160.601  15
   0 -12  -5 2697.82 238.151  18
   0 -12  -6 652.252 116.097  13
   0 -12  -6 865.793 155.305  18
   0 -12  -6 820.409 110.507  15
   0 -12  -6 635.999 126.914  10
   0  12   6 657.952 114.042  16
   0 -12  -6 779.533 139.938  19
   0 -12  -7 595.410 106.638  13
   0  12   7 396.842 93.2256  16
   0 -12  -7 555.801 115.865  10
   0 -12  -7 431.349 90.2289  15
   0 -12  -7 436.939 110.888  19
   0 -12  -7 649.513 139.107  18
   0 -12  -8 92.9068 94.9661  18
   0  12   8 167.777 72.7710  16
   0 -12  -8 125.740 98.3592  19
   0 -12  -8 366.576 100.813  10
   0 -12  -8 247.932 85.7654  15
   0 -12  -9 711.483 136.076  19
   0 -12  -9 675.354 129.898  10
   0 -12  -9 827.522 140.229  18
   0 -12 -10 1462.77 180.709  18
   0 -12 -10 1515.20 156.428  10
   0 -12 -10 1242.98 128.918  20
   0 -12 -10 1457.90 163.151  19
   0  12  11 1870.63 166.761  17
   0 -12 -11 1667.34 136.990  20
   0 -12 -11 2003.59 170.030  19
   0 -12 -11 2165.87 171.750  10
   0 -12 -11 2134.03 195.595  18
   0 -12 -12 39.8612 60.2792  10
   0 -12 -12 136.242 71.3648  19
   0  12  12 81.8654 66.6070  17
   0 -12 -12 235.795 96.9641  18
   0  12  13 138.363 62.5073  17
   0 -12 -13 232.042 71.4683  19
   0 -12 -13 134.660 75.2950  18
   0 -12 -13 143.935 57.2173  10
   0  12  14 831.360 87.2060  17
   0 -12 -14 959.359 106.779  18
   0 -12 -14 862.204 83.9699  10
   0 -12 -14 967.585 92.7536  19
   0 -12 -15 387.523 50.6133  10
   0  12  15 277.235 49.3662  17
   0 -12 -15 265.111 44.1729  19
   0  13 -21 999.877 74.1134  11
   0 -13  21 1070.45 87.4497  13
   0  13 -21 958.065 57.7846   7
   0 -13  20 1386.05 106.176  18
   0 -13  20 1496.17 122.253  13
   0  13 -20 1335.19 103.946  11
   0 -13  19-48.8944 61.8851  13
   0 -13  19 8.11153 52.7861  18
   0  13 -19-31.2367 62.7490  11
   0 -13  18 3192.51 206.976  13
   0 -13  18 3138.95 200.806  18
   0  13 -18 3017.50 188.694  11
   0 -13  17 869.467 124.349  18
   0 -13  17 564.104 116.243  13
   0  13 -17 919.758 128.560  11
   0 -13  16 59.1239 81.2492  18
   0 -13  16 241.106 99.2956  13
   0  13 -16 85.1754 78.2164  11
   0  13 -15 828.574 130.183  11
   0 -13  15 848.808 142.220  13
   0 -13  15 774.067 134.230  18
   0 -13  14 1080.88 152.602  18
   0 -13  14 1016.33 155.547  13
   0  13 -14 1193.76 156.924  11
   0 -13  13 157.614 102.782  13
   0 -13  13 120.047 97.8347  18
   0  13 -13 44.3530 85.8679  11
   0  13 -12-47.6496 88.0243  11
   0 -13  12 53.1130 88.3535  18
   0 -13  12-55.9398 99.2002  13
   0  13 -11 2587.84 237.042  16
   0  13 -11 2470.19 201.628  11
   0 -13  11 2427.42 223.996  18
   0 -13  11 2118.91 209.114  13
   0  13 -10 16586.1 517.869  11
   0 -13  10 16236.1 566.126  18
   0  13 -10 16341.9 593.106  16
   0 -13  10 16542.9 543.653  13
   0 -13   9 10073.1 435.216  18
   0  13  -9 10586.8 393.492  11
   0  13  -9 10510.3 483.588  16
   0 -13   9 10009.6 411.243  13
   0  13  -8 56.1307 107.814  16
   0 -13   8 106.789 106.104  13
   0 -13   8 96.9271 91.2119  18
   0  13  -8-4.65591 65.8829  11
   0 -13   7 653.182 123.347  13
   0  13  -7 789.052 164.451  16
   0 -13   7 940.430 151.501  18
   0  13  -7 776.203 106.941  11
   0  13  -6 6013.10 369.653  16
   0 -13   6 5556.79 301.633  13
   0 -13   6 5934.19 326.936  18
   0 -13   5 980.573 141.667  13
   0 -13   5 932.947 145.801  18
   0  13  -5 863.255 165.121  16
   0 -13   4 131.258 80.6489  18
   0  13  -4 147.568 116.914  16
   0 -13   4 225.563 102.252  13
   0 -13   3 511.199 103.418  10
   0  13  -3 566.210 128.842  16
   0 -13   3 667.466 132.665  18
   0 -13   3 487.812 106.756  13
   0 -13   2 892.067 134.279  18
   0 -13   2 921.918 128.026  13
   0 -13   2 833.453 126.183  10
   0  13  -2 956.902 165.928  16
   0  13  -1 7209.82 387.264  16
   0 -13   1 7212.13 321.249  10
   0 -13   1 7582.37 371.630  18
   0 -13   1 6730.68 317.566  13
   0  13   0 223.345 107.028  16
   0 -13   0 419.960 92.1191  10
   0 -13   0 347.119 103.881  13
   0 -13   0 516.812 127.952  18
   0 -13  -1 3595.68 264.347  18
   0 -13  -1 3424.17 230.964  10
   0  13   1 3667.28 273.182  16
   0 -13  -1 3159.35 222.035  13
   0  13   2 0.26601 86.5653  16
   0 -13  -2 273.868 117.031  18
   0 -13  -2 76.4366 74.4858  13
   0 -13  -2 225.301 90.1791  10
   0 -13  -3 188.604 90.5956  13
   0 -13  -3 256.325 69.6426  15
   0 -13  -3 322.898 100.763  10
   0  13   3 288.557 98.8809  16
   0 -13  -4 1717.44 191.738  19
   0 -13  -4 2031.62 177.459  13
   0 -13  -4 2402.02 157.724  15
   0 -13  -4 2416.33 194.106  10
   0 -13  -4 2121.53 211.157  18
   0  13   4 2177.05 203.257  16
   0  13   5 272.600 106.823  16
   0 -13  -5 303.638 86.5172  10
   0 -13  -5 45.6799 75.5026  19
   0 -13  -5 228.363 84.1585  15
   0 -13  -5 260.214 88.3826  13
   0 -13  -5 237.894 110.532  18
   0 -13  -6 157.455 83.8993  19
   0  13   6 161.092 72.8022  16
   0 -13  -6 224.431 93.5975  10
   0 -13  -6 122.307 78.9719  13
   0 -13  -6 84.2047 94.3744  18
   0 -13  -7 8075.70 385.078  18
   0  13   7 7632.76 309.003  16
   0 -13  -7 7226.55 354.533  19
   0 -13  -7 7257.11 332.160  10
   0 -13  -8 9605.66 392.868  19
   0 -13  -8 10238.4 381.016  10
   0 -13  -8 9936.03 425.604  18
   0  13   8 10020.7 331.976  16
   0 -13  -9 3409.48 248.261  18
   0 -13  -9 3158.85 203.051  10
   0 -13  -9 3059.59 191.896  20
   0 -13  -9 2977.46 214.184  19
   0 -13 -10 324.232 79.8584  19
   0 -13 -10 401.447 109.169  18
   0  13  10 339.723 85.3423  17
   0 -13 -10 341.117 75.3753  20
   0 -13 -10 396.264 82.4000  10
   0 -13 -11 61.8137 56.8963  19
   0  13  11 61.2970 51.7830  17
   0 -13 -11 29.2706 50.4366  10
   0 -13 -11 0.19446 78.0552  18
   0 -13 -11 83.0360 45.2373  20
   0  13  12 53.1455 51.9260  17
   0 -13 -12 55.6278 44.5225  19
   0 -13 -12-4.62500 43.6452  10
   0 -13 -12-35.8381 61.1126  18
   0 -13 -13 6.51671 35.2751  19
   0 -13 -13 105.651 58.7481  18
   0 -13 -13 23.0578 32.2649  10
   0  13  13 89.7385 43.3792  17
   0  14 -20 358.448 51.7704  11
   0 -14  20 313.429 53.0557  13
   0 -14  19 284.761 65.9998  13
   0  14 -19 258.817 56.8270  11
   0 -14  19 165.603 50.0727  18
   0  14 -18 221.011 64.8351  11
   0 -14  18 175.219 66.7530  13
   0 -14  18 267.663 69.1856  18
   0 -14  17 681.813 106.425  13
   0  14 -17 603.330 92.8518  11
   0 -14  17 477.067 87.7913  18
   0 -14  16 0.19058 84.0604  13
   0  14 -16 83.4714 71.2974  11
   0 -14  16 105.358 73.1911  18
   0  14 -15 230.041 84.9717  11
   0 -14  15 113.953 88.5051  13
   0 -14  15 36.1306 76.9515  18
   0  14 -14 491.720 108.899  11
   0 -14  14 493.996 118.207  13
   0 -14  14 318.916 103.921  18
   0 -14  13 752.079 128.353  18
   0  14 -13 654.568 109.526  11
   0 -14  13 765.530 133.279  13
   0 -14  12 156.305 94.8308  18
   0  14 -12 281.204 99.0865  11
   0 -14  12 331.500 108.159  13
   0  14 -12 302.785 97.8888  16
   0  14 -11-4.70328 75.5328  11
   0 -14  11-69.3926 89.9720  13
   0  14 -11 221.765 92.9047  16
   0 -14  11 22.9564 84.4209  18
   0 -14  10 578.777 117.757  18
   0  14 -10 680.706 150.266  16
   0  14 -10 682.025 117.082  11
   0 -14  10 611.685 117.028  13
   0  14  -9 701.385 115.963  11
   0 -14   9 725.626 142.320  18
   0 -14   9 655.867 132.158  13
   0  14  -9 562.944 140.413  16
   0  14  -8 4072.28 301.632  16
   0  14  -8 3959.00 218.832  11
   0 -14   8 4075.34 275.427  18
   0 -14   8 4320.46 267.034  13
   0 -14   7 1813.24 192.010  18
   0  14  -7 1774.11 141.728  11
   0 -14   7 1716.26 181.427  13
   0  14  -7 1931.88 226.011  16
   0 -14   6 1115.18 157.113  18
   0 -14   6 851.982 136.743  13
   0  14  -6 1020.11 184.901  16
   0 -14   5 343.782 116.765  18
   0 -14   5 628.122 126.077  13
   0  14  -5 483.265 141.993  16
   0 -14   4 2538.99 204.994  13
   0 -14   4 2941.96 240.607  18
   0  14  -4 2910.43 259.222  16
   0 -14   3 2838.69 214.038  13
   0 -14   3 3395.15 254.996  18
   0  14  -3 2999.05 265.573  16
   0  14  -2 90.1344 115.357  16
   0 -14   2 162.322 106.621  18
   0 -14   2 130.645 90.5994  10
   0 -14   2 147.478 91.4851  13
   0 -14   1 49.6566 74.6790  13
   0 -14   1-61.3170 94.8622  18
   0  14  -1-28.3924 100.341  16
   0 -14   1 83.9816 65.6031  10
   0 -14   0 940.156 150.416  18
   0  14   0 697.725 146.874  16
   0 -14   0 646.829 118.849  13
   0 -14   0 792.764 122.658  10
   0 -14  -1 3362.79 217.745  10
   0 -14  -1 2827.32 206.761  13
   0 -14  -1 3392.17 259.670  18
   0  14   1 3688.19 267.561  16
   0 -14  -2 213.509 82.7295  10
   0 -14  -2 150.847 101.991  18
   0 -14  -2 138.668 80.9503  13
   0  14   2 40.9087 91.8168  16
   0 -14  -3 43.0119 96.1078  18
   0 -14  -3 266.297 106.495  19
   0 -14  -3 283.401 91.6974  13
   0  14   3 90.6583 85.6470  16
   0 -14  -3 112.060 70.5932  10
   0 -14  -4 234.152 96.7681  19
   0 -14  -4 154.918 78.0886  13
   0 -14  -4 129.341 110.644  18
   0 -14  -4 227.197 80.3099  10
   0  14   4 256.306 93.9905  16
   0  14   5 373.026 105.217  16
   0 -14  -5 434.846 96.1590  13
   0 -14  -5 336.435 90.1763  19
   0 -14  -5 369.061 88.3830  10
   0 -14  -5 367.560 114.492  18
   0 -14  -6 144.001 72.8194  19
   0 -14  -6 254.403 112.972  18
   0  14   6 281.362 73.0488  16
   0 -14  -6 382.981 88.9380  10
   0 -14  -7 401.173 92.3434  19
   0 -14  -7 614.341 95.2213  10
   0  14   7 509.630 84.6607  16
   0 -14  -7 433.952 107.488  18
   0 -14  -8 309.676 85.3958  19
   0 -14  -8 399.405 105.276  18
   0 -14  -8 92.1464 56.5120  10
   0 -14  -8 231.759 72.3576  20
   0  14   8 173.141 61.5103  17
   0  14   8 203.565 54.1873  16
   0  14   9 978.316 101.791  17
   0 -14  -9 1293.15 140.550  18
   0 -14  -9 1228.97 109.759  10
   0 -14  -9 996.120 110.450  19
   0 -14  -9 1163.92 104.679  20
   0 -14 -10 572.707 73.1190  10
   0  14  10 620.840 77.5295  17
   0 -14 -10 564.303 80.0252  19
   0 -14 -10 642.233 70.6846  20
   0 -14 -10 728.909 106.018  18
   0 -14 -11-68.5735 60.2087  18
   0 -14 -11 49.5533 39.4521  19
   0  14  11-110.137 44.8123  17
   0  14  12-47.0775 28.3007  17
   0 -14 -12 30.4605 45.0527  18
   0 -15  18 447.230 55.7825  18
   0  15 -18 364.583 60.9226  11
   0 -15  18 372.656 67.4060  13
   0 -15  17 87.3222 57.7440  13
   0 -15  17-1.84575 42.2067  18
   0  15 -17 70.8925 52.3274  11
   0  15 -16 41.8576 52.7412  11
   0 -15  16 94.1425 55.7564  18
   0 -15  16 52.5113 67.8534  13
   0 -15  15 531.819 93.2616  18
   0  15 -15 497.875 85.1270  11
   0 -15  15 440.287 97.3988  13
   0  15 -14 492.708 95.7050  11
   0 -15  14 563.848 105.317  13
   0 -15  14 460.142 97.2986  18
   0  15 -13 3157.98 193.453  11
   0 -15  13 3017.52 206.440  18
   0 -15  13 2966.32 204.245  13
   0 -15  12 717.237 117.461  13
   0  15 -12 788.589 110.206  11
   0  15 -12 666.565 111.142  16
   0 -15  12 481.038 110.897  18
   0  15 -11 86.6147 67.7047  11
   0 -15  11-42.1516 81.0889  18
   0 -15  11 73.7255 80.3479  13
   0  15 -11 0.22405 73.1846  16
   0 -15  10 310.395 97.1083  18
   0  15 -10 402.805 84.9160  11
   0 -15  10 372.554 101.931  13
   0  15 -10 489.700 118.923  16
   0 -15   9 131.325 89.2363  13
   0  15  -9 129.513 103.332  16
   0  15  -9 85.1397 68.5108  11
   0 -15   9 158.150 91.4355  18
   0 -15   8 773.157 134.246  18
   0  15  -8 811.255 103.561  11
   0  15  -8 1028.17 160.220  16
   0 -15   8 743.900 125.897  13
   0 -15   7 388.755 102.378  13
   0  15  -7 567.571 141.409  16
   0 -15   7 569.902 129.837  18
   0 -15   6 2965.91 216.642  13
   0 -15   6 3504.55 246.445  18
   0  15  -6 3599.98 278.378  16
   0 -15   5 1671.51 171.079  13
   0  15  -5 1691.07 205.604  16
   0 -15   5 1586.25 180.810  18
   0 -15   4 2575.06 202.194  13
   0 -15   4 2834.03 229.279  18
   0  15  -4 2914.97 249.838  16
   0 -15   3 1756.93 168.519  13
   0  15  -3 1490.64 199.830  16
   0 -15   3 1888.66 195.100  18
   0 -15   2 1522.73 159.049  13
   0  15  -2 1362.89 187.783  16
   0 -15   2 1517.45 179.235  18
   0 -15   1 263.237 98.4695  18
   0 -15   1 160.003 84.3481  13
   0  15  -1 159.509 96.0454  16
   0  15   0 1616.87 178.697  16
   0 -15   0 1310.68 170.013  18
   0 -15   0 1363.13 149.962  13
   0 -15  -1 3030.95 220.960  19
   0  15   1 3225.99 241.795  16
   0 -15  -1 3461.92 248.005  18
   0 -15  -1 2826.19 194.776  13
   0 -15  -2 378.288 98.6461  13
   0  15   2 358.062 105.875  16
   0 -15  -2 282.367 104.815  18
   0 -15  -2 451.165 106.140  19
   0 -15  -3 331.397 82.4844  13
   0  15   3 357.446 98.6297  16
   0 -15  -3 238.202 77.5386  19
   0 -15  -3 308.804 99.1802  18
   0 -15  -4 31.3371 62.4884  19
   0 -15  -4 81.6385 62.9790  13
   0 -15  -4-79.0741 77.4692  18
   0  15   4-38.4152 79.0442  16
   0 -15  -5 298.463 87.4665  19
   0  15   5 349.621 84.0409  16
   0 -15  -5 309.499 92.5100  18
   0 -15  -6 267.030 73.3030  19
   0  15   6 293.265 69.1189  16
   0 -15  -6 301.785 89.6718  18
   0 -15  -7 24.9586 48.4490  19
   0  15   7 172.010 49.1368  16
   0 -15  -7 226.673 73.5607  20
   0 -15  -7 203.202 74.2227  18
   0 -15  -8 397.549 68.4347  19
   0 -15  -8 411.552 63.0749  20
   0 -15  -8 438.708 89.1862  18
   0 -15  -9 439.048 57.3510  20
   0 -15  -9 386.159 54.2954  19
   0 -15  -9 422.218 79.9411  18
   0 -15 -10-78.2054 49.3563  18
   0  16 -16 1667.57 103.238  11
   0 -16  16 1791.09 117.256  13
   0 -16  15 185.068 56.3973  18
   0  16 -15 151.943 52.7612  11
   0 -16  15 158.351 63.2504  13
   0 -16  14 1743.63 132.955  18
   0 -16  14 1785.57 140.678  13
   0  16 -14 1949.77 123.807  11
   0 -16  13 232.348 69.6360  18
   0 -16  13 262.886 76.3943  13
   0  16 -13 307.287 62.6938  11
   0  16 -12 259.167 59.1547  11
   0  16 -12 212.412 57.8687  16
   0 -16  12 438.599 90.1641  18
   0 -16  12 328.680 85.0349  13
   0 -16  11 276.608 81.8792  13
   0  16 -11 82.8119 48.4183  11
   0 -16  11 132.065 64.7539  18
   0  16 -11 198.147 74.1816  16
   0 -16  10 395.565 99.0633  13
   0  16 -10 283.289 66.1349  11
   0 -16  10 256.259 86.8786  18
   0  16 -10 269.038 83.9555  16
   0 -16   9 209.938 82.2282  13
   0 -16   9 220.334 87.4547  18
   0  16  -9 258.927 96.3694  16
   0 -16   8 859.792 122.735  13
   0  16  -8 835.152 138.128  16
   0 -16   8 912.718 128.271  18
   0 -16   7 613.250 116.533  18
   0 -16   7 737.332 118.830  13
   0  16  -7 607.421 135.060  16
   0 -16   6 1783.88 160.613  13
   0  16  -6 2009.46 197.156  16
   0 -16   6 1822.14 176.835  18
   0 -16   5 473.554 109.282  18
   0 -16   5 400.034 95.4734  13
   0  16  -5 513.104 123.101  16
   0 -16   4 1287.22 155.184  18
   0  16  -4 1281.70 168.708  16
   0 -16   3 63.5584 84.7175  18
   0 -16   3 62.4379 72.0781  13
   0  16  -3 99.1230 90.3925  16
   0 -16   2 506.290 95.9846  13
   0  16  -2 717.173 134.781  16
   0 -16   2 754.797 124.384  18
   0 -16   1 245.121 74.4944  13
   0 -16   1 257.332 91.5519  18
   0  16  -1 318.815 105.129  16
   0 -16   0 5609.28 254.234  13
   0 -16   0 6594.68 313.424  18
   0 -16   0 5352.73 269.337  19
   0  16   0 6347.32 304.483  16
   0 -16  -1 407.317 108.069  18
   0  16   1 353.103 93.7458  16
   0 -16  -1 348.532 81.3917  13
   0 -16  -1 171.808 72.3886  19
   0  16   2 193.756 77.3027  16
   0 -16  -2 104.622 80.6940  18
   0 -16  -2 138.009 67.2405  19
   0 -16  -2 170.943 58.8116  13
   0  16   3 672.736 104.641  16
   0 -16  -3 647.377 110.278  18
   0 -16  -3 494.062 87.6884  19
   0 -16  -3 420.661 77.8241  13
   0 -16  -4 299.170 66.5090  19
   0  16   4 458.989 82.2110  16
   0 -16  -4 419.324 92.9983  18
   0  16   5 204.757 51.9353  16
   0 -16  -5 171.052 67.6193  18
   0 -16  -5 77.1726 43.5940  19
   0  16   6 692.917 65.2786  16
   0 -16  -6 724.765 98.3407  18
   0 -16  -6 804.931 83.6432  20
   0 -16  -7 126.745 55.5902  18
   0 -16  -7 37.1579 35.5971  20
   0 -17  14 170.609 39.8547  18
   0  17 -14 145.720 33.9997  11
   0 -17  13 0.67078 46.4903  13
   0 -17  13 76.8312 42.2042  18
   0  17 -13 44.0669 31.8426  11
   0  17 -12 1253.69 77.2731  11
   0 -17  12 1440.86 115.394  13
   0 -17  12 1258.33 105.401  18
   0 -17  11 155.790 55.3384  18
   0 -17  11 160.052 62.4074  13
   0  17 -11 144.555 43.9602  16
   0 -17  10 460.839 84.9870  13
   0  17 -10 498.449 78.9687  16
   0 -17  10 403.150 78.0110  18
   0 -17   9 312.581 74.8914  18
   0 -17   9 322.602 74.9799  13
   0  17  -9 292.747 73.9254  16
   0  17  -8-3.06229 63.1945  16
   0 -17   8 75.5526 62.8715  13
   0 -17   8 99.6464 67.8599  18
   0 -17   7 337.403 77.1349  13
   0  17  -7 242.544 88.9358  16
   0 -17   7 256.192 76.2984  18
   0 -17   6 373.516 91.2514  18
   0 -17   6 347.900 74.6248  13
   0  17  -6 335.747 93.4833  16
   0  17  -5 1631.15 157.464  16
   0 -17   5 1771.30 154.008  18
   0 -17   5 1779.71 138.361  13
   0  17  -4 116.041 69.9752  16
   0 -17   4 75.8778 68.3886  18
   0 -17   4 130.752 64.5889  13
   0 -17   3-15.2785 59.9211  13
   0 -17   3 10.4800 66.8393  18
   0 -17   3 46.5658 46.1428  19
   0  17  -3 104.449 78.5225  16
   0 -17   2 341.934 86.8479  18
   0 -17   2 269.341 65.1611  19
   0 -17   2 254.616 66.5383  13
   0  17  -2 253.328 86.2470  16
   0  17  -1 2655.12 181.993  16
   0 -17   1 2439.83 144.508  13
   0 -17   1 2183.18 142.267  19
   0  17   0 161.811 69.8402  16
   0 -17   0-21.3842 44.1719  19
   0 -17   0 82.0363 48.5732  13
   0 -17   0 120.655 72.5018  18
   0 -17  -1 150.991 51.0237  13
   0 -17  -1 216.930 72.8081  18
   0  17   1 178.588 60.7624  16
   0  17   2 425.721 67.8451  16
   0 -17  -2 416.828 80.8819  18
   0 -17  -3 99.4528 54.7990  18
   0  17   3-8.62708 42.2438  16
   0 -17  -4-14.6935 41.9702  20
   0 -17  -4 79.1209 50.6700  18
   0  17   4 34.6230 33.6189  16
   0 -17  -5 1.88727 33.2305  20
   0 -17  -5 76.3042 42.3847  18
   0 -18  11-20.6142 34.7763  13
   0 -18  10 523.087 63.9021  13
   0  18 -10 540.111 53.3717  16
   0 -18  10 596.957 66.5281  18
   0 -18   9 78.0235 44.6740  18
   0 -18   9 39.1784 39.8608  13
   0  18  -9 56.1787 37.5820  16
   0 -18   8 43.7209 39.7209  18
   0 -18   8 119.695 45.8773  13
   0 -18   7-48.5818 41.9596  13
   0  18  -7 28.6419 44.5017  16
   0 -18   7 26.6737 42.3599  18
   0 -18   6 343.074 60.6740  13
   0  18  -6 249.364 65.5821  16
   0 -18   6 442.725 73.9878  18
   0 -18   5 882.905 96.4894  18
   0 -18   5 839.078 80.3708  13
   0  18  -5 891.143 97.7033  16
   0 -18   4 100.673 50.8573  18
   0  18  -4 207.925 59.9754  16
   0  18  -3 68.4770 46.9749  16
   0 -18   3 131.446 52.9887  18
   0 -18   3 94.8555 38.9077  13
   0  18  -2 177.479 54.4080  16
   0 -18   2 129.516 36.6915  13
   0  18  -1 438.713 65.9057  16
   0 -18   1 370.149 64.3765  18
   0 -18   0 151.096 46.5318  18
   0  18   0 238.959 50.0155  16
   1 -18  -3 418.014 59.1748  18
  -1  18   3 340.404 43.2226  16
   1 -18  -3 398.101 56.8966  20
   1 -18  -2-10.2030 38.6724  18
  -1  18   2 76.8612 36.7802  16
   1 -18  -1 139.277 42.6675  19
  -1  18   1 152.680 48.7329  16
   1 -18  -1 97.8252 48.1363  18
   1 -18   0 11.9684 40.4399  19
  -1  18   0 86.9799 52.1044  16
   1 -18   0 68.5819 48.5446  18
  -1  18  -1 382.134 76.4932  16
   1 -18   1 350.495 65.7512  19
   1 -18   1 265.021 57.6245  13
   1 -18   1 478.816 74.9977  18
  -1  18  -2-33.8453 56.9404  16
   1 -18   2 110.110 49.3291  13
   1 -18   2 31.8496 46.6163  19
   1 -18   2 115.408 53.5386  18
   1 -18   3 625.414 89.8927  18
  -1  18  -3 831.829 105.233  16
   1 -18   3 573.751 79.7232  19
   1 -18   3 663.702 86.1624  13
   1 -18   4 2418.13 146.866  13
  -1  18  -4 2482.02 164.614  16
   1 -18   4 2155.41 144.117  18
   1 -18   5-13.5517 54.6189  18
  -1  18  -5 113.542 64.8996  16
   1 -18   6 534.796 79.1135  18
  -1  18  -6 620.576 91.4680  16
   1 -18   6 798.103 94.6182  13
   1 -18   7 61.7606 50.6042  13
  -1  18  -7 38.7051 59.1511  16
   1 -18   7-2.32059 46.6743  18
   1 -18   8 240.571 55.7004  18
   1 -18   8 279.285 64.6594  13
  -1  18  -8 343.212 72.2879  16
  -1  18  -9 794.815 86.0670  16
   1 -18   9 916.089 95.7382  13
   1 -18   9 765.027 79.0039  18
   1 -18  10 100.908 39.4507  18
  -1  18 -10 105.986 43.4053  16
   1 -18  10 37.8697 49.2119  13
  -1  18 -11 346.553 46.7567  16
   1 -18  11 654.495 78.4329  13
   1 -18  12-12.0842 39.0632  13
   1 -17  -6 13.6436 39.4054  18
   1 -17  -6-30.3789 37.8495  20
   1 -17  -5-40.4321 40.6060  19
  -1  17   5 49.0549 34.0341  16
   1 -17  -5 61.4614 49.0945  20
   1 -17  -5 143.216 55.3855  18
  -1  17   4 419.617 64.4847  16
   1 -17  -4 430.688 74.0948  18
   1 -17  -4 221.458 60.2596  19
  -1  17   3 569.056 79.5249  16
   1 -17  -3 435.979 85.2518  18
  -1  17   2 560.025 88.9588  16
   1 -17  -2 608.068 93.7863  19
   1 -17  -2 449.300 79.0165  13
   1 -17  -2 666.375 101.120  18
   1 -17  -1 117.634 65.9372  18
   1 -17  -1 256.875 76.8909  19
  -1  17   1 168.298 71.3017  16
   1 -17  -1 90.1413 60.3206  13
   1 -17   0 1538.82 133.505  13
   1 -17   0 1451.52 143.885  18
   1 -17   0 1399.52 137.721  19
  -1  17   0 1313.28 139.061  16
   1 -17   1 858.490 111.611  13
   1 -17   1 871.102 119.575  18
  -1  17  -1 655.330 115.708  16
   1 -17   1 813.666 113.531  19
   1 -17   2 1513.67 149.962  18
  -1  17  -2 1634.24 164.373  16
   1 -17   2 1820.75 149.397  13
  -1  17  -3 902.957 135.602  16
   1 -17   3 809.829 114.515  13
   1 -17   3 894.343 119.784  18
   1 -17   4 702.000 106.409  18
   1 -17   4 612.479 103.828  13
  -1  17  -4 776.911 126.083  16
  -1  17  -5 180.400 90.2359  16
   1 -17   5 333.879 92.1616  13
   1 -17   5 90.3649 65.4257  18
   1 -17   6 932.487 118.333  13
  -1  17  -6 1038.91 137.770  16
   1 -17   6 827.117 121.049  18
  -1  17  -7 127.865 81.2464  16
   1 -17   7 292.160 90.9961  18
   1 -17   7 368.565 95.3644  13
  -1  17  -8-9.70082 70.2479  16
   1 -17   8 86.6741 75.3088  13
   1 -17   8-125.433 67.5593  18
  -1  17  -9 437.866 91.4331  16
   1 -17   9 604.049 103.074  13
   1 -17   9 528.182 97.0065  18
   1 -17  10 390.891 81.1155  13
  -1  17 -10 381.150 84.3805  16
   1 -17  10 432.213 74.9130  18
  -1  17 -11 848.709 69.8983  11
   1 -17  11 870.734 93.3111  18
  -1  17 -11 835.265 94.5623  16
   1 -17  11 901.508 107.681  13
  -1  17 -12 1741.49 99.6985  11
   1 -17  12 1735.58 117.921  18
  -1  17 -12 1484.43 105.044  16
  -1  17 -13 919.732 72.4956  11
   1 -17  13 886.546 78.2812  18
  -1  17 -14 52.6067 34.0369  11
   1 -17  14-1.25183 44.3035  13
   1 -17  15 20.7969 38.7417  13
  -1  17 -15 57.2610 26.8097  11
   1 -16  -9 334.792 59.1482  18
   1 -16  -9 93.4494 31.5976  20
   1 -16  -8 478.587 66.5351  19
   1 -16  -8 571.417 82.2229  18
   1 -16  -8 660.255 72.9246  20
   1 -16  -7 70.0215 47.8093  19
   1 -16  -7 2.31520 54.4660  18
   1 -16  -7 18.1568 48.4678  20
   1 -16  -6 51.6302 54.8270  20
   1 -16  -6-29.0288 53.1187  19
  -1  16   6 161.326 46.8657  16
   1 -16  -6 68.0393 65.4207  18
   1 -16  -5 475.801 98.6531  18
   1 -16  -5 346.301 81.7913  19
  -1  16   5 275.751 64.3600  16
   1 -16  -4 378.106 89.8073  19
   1 -16  -4 306.488 73.2416  13
  -1  16   4 331.974 80.1116  16
   1 -16  -4 473.385 112.165  18
   1 -16  -3 924.831 125.578  19
   1 -16  -3 1092.52 120.332  13
   1 -16  -3 1101.87 140.787  18
  -1  16   3 933.013 120.759  16
  -1  16   2 979.617 131.457  16
   1 -16  -2 969.296 136.428  19
   1 -16  -2 834.387 117.787  13
   1 -16  -2 938.620 137.750  18
  -1  16   1 2386.33 195.924  16
   1 -16  -1 2320.31 197.560  18
   1 -16  -1 2735.22 209.241  19
   1 -16  -1 2482.79 189.909  13
  -1  16   0 740.530 136.153  16
   1 -16   0 451.592 112.828  18
   1 -16   0 529.156 107.936  13
  -1  16  -1 586.630 127.947  16
   1 -16   1 580.107 120.359  18
   1 -16   1 607.823 115.720  13
   1 -16   2 2703.93 215.166  18
   1 -16   2 2792.95 205.062  13
  -1  16  -2 2656.97 233.204  16
  -1  16  -3-10.9239 93.7655  16
   1 -16   3-4.54660 80.7950  13
   1 -16   3 195.631 98.8191  18
   1 -16   4 1680.89 168.700  13
  -1  16  -4 1763.31 201.530  16
   1 -16   4 1908.52 183.335  18
   1 -16   5 420.798 109.912  13
  -1  16  -5 364.778 113.838  16
   1 -16   5 470.959 99.5234  18
  -1  16  -6 141.532 105.645  16
   1 -16   6 168.173 93.1556  13
   1 -16   6 121.146 81.8197  18
  -1  16  -7 22.3567 102.610  16
   1 -16   7-7.02107 86.3480  13
   1 -16   8 1174.21 138.757  18
   1 -16   8 1263.42 148.061  13
  -1  16  -8 1268.95 165.679  16
   1 -16   9 3.41556 77.7585  13
  -1  16  -9 40.5100 51.5235  11
  -1  16  -9 11.7694 81.6995  16
   1 -16   9 1.89267 70.6377  18
  -1  16 -10 918.871 99.0065  11
   1 -16  10 867.395 130.160  13
   1 -16  10 712.196 107.746  18
  -1  16 -10 794.339 124.537  16
   1 -16  11 428.801 96.2733  18
   1 -16  11 415.051 102.281  13
  -1  16 -11 356.274 90.1806  16
  -1  16 -11 425.510 72.9456  11
  -1  16 -12 244.102 72.4344  16
  -1  16 -12 221.809 66.2970  11
   1 -16  12 137.014 72.5179  18
   1 -16  12 171.474 89.6275  13
  -1  16 -13 1239.39 107.246  11
   1 -16  13 1134.64 114.224  18
   1 -16  13 1296.48 134.615  13
   1 -16  14 23.1332 45.7550  18
  -1  16 -14 117.785 57.0047  11
   1 -16  14-21.9180 65.5794  13
   1 -16  15 85.6569 57.5622  13
   1 -16  15 147.881 51.3754  18
  -1  16 -15 228.116 59.3612  11
  -1  16 -16 181.872 49.5488  11
   1 -16  16 126.856 55.9199  13
   1 -16  17 58.7778 41.1121  13
  -1  16 -17 77.7318 39.7082  11
  -1  15  11 94.9381 33.7860  17
   1 -15 -11 74.5162 36.8224  19
   1 -15 -11 135.803 48.3875  18
   1 -15 -10 12.8606 37.1402  20
   1 -15 -10 63.6541 44.4325  19
  -1  15  10 131.671 40.4686  17
   1 -15 -10 89.0155 51.6903  18
   1 -15  -9 2982.09 156.943  20
   1 -15  -9 2802.41 167.859  19
   1 -15  -9 2873.10 184.033  18
   1 -15  -8 3967.44 227.858  18
   1 -15  -8 3568.40 206.195  19
   1 -15  -8 3736.35 193.901  20
   1 -15  -7 1886.57 173.403  18
  -1  15   7 1782.90 123.706  16
   1 -15  -7 1839.60 158.390  19
   1 -15  -7 1647.99 147.523  20
  -1  15   6 672.361 93.1690  16
   1 -15  -6 864.397 124.265  19
   1 -15  -6 800.027 132.604  18
   1 -15  -5-15.5694 72.2599  19
   1 -15  -5 70.6459 67.6777  13
  -1  15   5 56.4267 68.8410  16
   1 -15  -5 110.284 83.0237  18
   1 -15  -4 3644.45 247.552  19
   1 -15  -4 3650.33 222.797  13
  -1  15   4 3459.13 223.592  16
   1 -15  -4 3675.99 259.077  18
  -1  15   3 800.759 130.534  16
   1 -15  -3 578.402 130.623  18
   1 -15  -3 775.659 133.932  19
   1 -15  -3 673.729 122.767  13
   1 -15  -2 316.464 115.278  18
  -1  15   2 336.491 104.141  16
   1 -15  -2 229.081 96.1615  13
   1 -15  -1 2098.33 199.028  18
   1 -15  -1 1922.96 177.925  13
  -1  15   1 2114.51 208.565  16
  -1  15   0 1722.37 196.404  16
   1 -15   0 1445.24 166.783  13
   1 -15   0 1225.10 168.198  18
  -1  15  -1 2703.93 246.215  16
   1 -15   1 2316.06 199.170  13
   1 -15   1 2681.76 225.170  18
   1 -15   2 2888.08 218.554  13
   1 -15   2 2975.97 233.704  18
  -1  15  -2 3131.07 264.293  16
   1 -15   3 269.718 103.190  13
  -1  15  -3 226.092 113.425  16
   1 -15   3 213.371 100.118  18
  -1  15  -4 118.760 111.014  16
   1 -15   4 96.4551 93.8523  18
   1 -15   4 197.719 98.5458  13
  -1  15  -5 140.726 117.579  16
   1 -15   5 251.020 100.801  18
   1 -15   5 99.2175 89.6859  13
  -1  15  -6 551.534 146.355  16
   1 -15   6 553.380 123.177  13
   1 -15   6 519.955 114.456  18
   1 -15   7 592.996 123.467  18
  -1  15  -7 680.847 150.102  16
   1 -15   7 466.928 108.160  13
  -1  15  -8 303.875 118.757  16
  -1  15  -8 154.843 63.2313  11
   1 -15   8 254.012 87.8084  18
   1 -15   8 147.563 90.3901  13
   1 -15   9 557.281 119.358  18
  -1  15  -9 535.987 97.6336  11
  -1  15  -9 620.251 146.567  16
   1 -15   9 409.441 107.085  13
  -1  15 -10 30.6047 64.2288  11
  -1  15 -10 115.934 94.4428  16
   1 -15  10 70.5984 74.2018  18
   1 -15  10 183.543 91.7883  13
   1 -15  11 1106.26 153.999  13
   1 -15  11 1194.33 144.950  18
  -1  15 -11 1098.72 121.643  11
  -1  15 -11 1077.46 156.945  16
   1 -15  12 602.318 103.090  18
   1 -15  12 465.851 112.646  13
  -1  15 -12 393.642 106.971  16
  -1  15 -12 546.728 102.987  11
  -1  15 -13 195.428 76.2824  11
   1 -15  13 135.192 84.4330  13
   1 -15  13 139.143 72.6880  18
   1 -15  14 433.079 86.6639  18
   1 -15  14 308.047 101.763  13
  -1  15 -14 438.263 93.5874  11
   1 -15  15 371.433 81.5112  18
  -1  15 -15 236.366 72.3253  11
   1 -15  15 323.935 91.7248  13
  -1  15 -16 39.9579 57.6937  11
   1 -15  16 9.11557 61.8704  13
   1 -15  16-2.91728 48.2308  18
   1 -15  17 318.788 56.5214  18
   1 -15  17 508.829 85.5939  13
  -1  15 -17 570.820 82.1498  11
   1 -15  18 87.4865 53.5275  13
  -1  15 -18 75.3356 42.9466  11
   1 -14 -13 77.7250 36.4420  19
  -1  14  13 30.3200 31.2754  17
   1 -14 -12 100.712 38.5803  20
   1 -14 -12 124.991 49.1474  19
  -1  14  12 57.9355 43.1935  17
   1 -14 -12 100.881 58.9019  18
   1 -14 -11 94.4710 46.5756  20
  -1  14  11 58.6023 52.4754  17
   1 -14 -11 197.310 75.1238  18
   1 -14 -11 162.209 68.1282  19
  -1  14  10 6234.49 261.661  17
   1 -14 -10 7137.47 262.626  20
   1 -14 -10 6895.56 305.328  18
   1 -14 -10 6804.68 285.950  19
   1 -14  -9 3765.44 243.982  18
   1 -14  -9 3571.61 202.606  20
   1 -14  -9 3469.39 220.570  19
   1 -14  -8 2736.87 210.895  19
   1 -14  -8 2563.58 217.116  18
   1 -14  -8 2355.28 175.423  20
   1 -14  -7 943.083 147.993  18
   1 -14  -7 786.926 125.524  19
  -1  14   7 631.299 92.8914  16
   1 -14  -6 232.332 101.669  19
   1 -14  -6 175.939 105.889  18
   1 -14  -6 166.032 80.9876  13
  -1  14   6 43.2903 77.2497  16
   1 -14  -6 209.873 75.4962  15
   1 -14  -5 1525.03 155.085  13
   1 -14  -5 1596.98 127.406  15
   1 -14  -5 1316.82 179.358  19
  -1  14   5 1343.99 147.418  16
   1 -14  -5 1750.47 194.109  18
   1 -14  -4 379.311 111.852  19
   1 -14  -4 252.566 115.871  18
  -1  14   4 447.151 110.817  16
   1 -14  -4 346.616 100.706  13
   1 -14  -4 147.641 63.9370  15
   1 -14  -3 1422.16 120.051  15
   1 -14  -3 1397.05 159.342  13
   1 -14  -3 1487.98 178.092  18
  -1  14   3 1499.04 179.440  16
   1 -14  -2 239.226 111.116  18
  -1  14   2 304.274 118.189  16
   1 -14  -2 131.871 99.5822  13
   1 -14  -1 532.936 128.479  18
  -1  14   1 479.583 129.575  16
   1 -14  -1 243.784 92.6137  13
   1 -14   0 2431.82 221.761  18
  -1  14   0 2355.99 230.465  16
   1 -14   0 2029.44 188.594  13
   1 -14   1 1739.82 181.812  13
  -1  14  -1 1837.99 220.062  16
   1 -14   1 1897.31 197.316  18
  -1  14  -2 7895.68 419.134  16
   1 -14   2 7811.43 356.345  13
   1 -14   2 8005.71 382.836  18
   1 -14   3 153.684 82.3240  13
  -1  14  -3 477.424 141.611  16
   1 -14   3 278.046 97.6881  18
  -1  14  -4 5243.76 353.488  16
   1 -14   4 4989.60 299.383  18
   1 -14   4 4858.03 291.734  13
   1 -14   5 2162.03 197.270  18
  -1  14  -5 2028.41 226.487  16
   1 -14   5 1951.20 189.284  13
   1 -14   6 2287.65 199.558  13
   1 -14   6 2294.73 205.814  18
  -1  14  -6 2285.71 246.843  16
  -1  14  -7-20.6722 61.8053  11
   1 -14   7-29.5833 89.9788  13
   1 -14   7 17.0579 82.1897  18
   1 -14   8 7042.64 355.233  18
  -1  14  -8 7418.46 418.157  16
  -1  14  -8 7061.77 296.144  11
   1 -14   8 7368.48 353.301  13
   1 -14   9 239.673 106.129  13
  -1  14  -9 272.880 97.1534  11
   1 -14   9 159.275 91.9216  18
  -1  14  -9 125.491 113.595  16
   1 -14  10 514.838 119.572  13
   1 -14  10 402.202 117.427  18
  -1  14 -10 490.860 132.148  16
  -1  14 -10 548.085 113.390  11
  -1  14 -11 685.070 139.649  16
  -1  14 -11 866.877 132.786  11
   1 -14  11 1146.67 158.616  13
   1 -14  11 1033.87 152.886  18
   1 -14  12 168.903 84.5632  18
   1 -14  12 436.532 117.078  13
  -1  14 -12 373.085 122.873  16
  -1  14 -12 367.073 111.053  11
  -1  14 -13 558.522 112.229  11
   1 -14  13 697.020 135.768  13
   1 -14  13 636.981 127.555  18
   1 -14  14 140.388 98.9333  13
   1 -14  14-60.1410 80.0800  18
  -1  14 -14 160.856 87.5150  11
  -1  14 -15 123.159 85.0123  11
   1 -14  15 252.296 77.2430  18
   1 -14  15 194.542 93.7047  13
   1 -14  16 743.421 125.019  13
   1 -14  16 506.824 96.0017  18
  -1  14 -16 611.099 106.595  11
   1 -14  17 387.202 97.9431  13
   1 -14  17 582.503 85.9399  18
  -1  14 -17 568.032 92.8073  11
   1 -14  18 91.5311 62.6281  13
  -1  14 -18 119.962 66.2635  11
   1 -14  18 44.0484 41.5254  18
  -1  14 -19 329.540 62.6399  11
   1 -14  19 392.716 72.0415  13
   1 -14  20 1113.81 84.8490  13
  -1  14 -20 1037.15 79.5956  11
  -1  13  14-0.73038 40.2415  17
   1 -13 -14 8.81289 41.4139  19
   1 -13 -13 42.7238 51.6710  19
   1 -13 -13 86.8283 72.7897  18
  -1  13  13 6.95672 50.1001  17
   1 -13 -12 127.921 76.9225  18
  -1  13  12 158.240 74.9586  17
   1 -13 -12 38.3119 54.7700  10
   1 -13 -12 86.2920 63.6207  19
   1 -13 -12 47.5008 53.2135  20
   1 -13 -11 863.893 105.312  10
   1 -13 -11 1036.13 133.708  19
   1 -13 -11 1017.07 111.256  20
   1 -13 -11 1127.75 147.590  18
   1 -13 -10 1005.98 148.887  18
   1 -13 -10 1000.08 137.715  19
   1 -13 -10 1081.04 124.191  20
   1 -13 -10 1001.82 114.739  10
   1 -13  -9 12018.6 375.864  15
   1 -13  -9 13164.7 492.591  18
   1 -13  -9 13245.5 423.286  10
   1 -13  -9 12956.7 475.592  19
   1 -13  -9 12499.0 423.257  20
   1 -13  -8 154.606 98.2896  19
   1 -13  -8 2.62026 73.0833  10
   1 -13  -8 15.1356 92.5332  18
   1 -13  -8 28.7791 70.6411  15
   1 -13  -7 2725.22 235.596  18
  -1  13   7 2367.72 184.590  16
   1 -13  -7 2473.17 170.149  15
   1 -13  -7 2387.52 190.588  13
   1 -13  -7 2380.47 187.066  10
   1 -13  -7 2368.59 222.929  19
   1 -13  -6 54.3788 64.6724  10
   1 -13  -6 79.8698 73.6268  15
  -1  13   6 41.6833 73.6530  16
   1 -13  -6 90.5269 83.7809  19
   1 -13  -6 282.044 103.672  18
   1 -13  -6 183.415 112.514  13
   1 -13  -5 110.264 89.4598  13
   1 -13  -5 117.085 102.303  19
   1 -13  -5 157.978 76.9949  15
  -1  13   5 146.758 87.8834  16
   1 -13  -5 167.803 101.863  18
   1 -13  -4 144.081 97.9163  13
   1 -13  -4 316.184 109.074  18
   1 -13  -4 145.075 73.9020   9
  -1  13   4 71.9417 92.7266  16
   1 -13  -4 58.1655 66.4810  15
   1 -13  -3 6890.23 361.901  18
   1 -13  -3 6133.48 272.538   9
   1 -13  -3 5892.43 309.853  13
  -1  13   3 6625.49 346.506  16
   1 -13  -3 6363.01 256.307  15
   1 -13  -2 70.2637 71.8406   9
   1 -13  -2 36.2663 83.7183  13
  -1  13   2 123.102 97.9720  16
   1 -13  -2 300.060 108.203  18
   1 -13  -1 6721.64 345.765  18
   1 -13  -1 5887.39 301.757  13
  -1  13   1 6450.50 364.322  16
   1 -13  -1 6164.06 271.836   9
   1 -13   0 9429.07 386.198  13
   1 -13   0 9742.40 420.148  18
  -1  13   0 10283.2 458.672  16
   1 -13   0 9414.24 339.406   9
   1 -13   1 1281.05 150.583  13
  -1  13  -1 1386.61 188.527  16
   1 -13   1 1435.40 132.488   9
  -1  13  -1 1725.14 296.172   2
   1 -13   1 1428.70 164.187  18
  -1  13  -2 150.539 154.800   2
   1 -13   2 453.347 89.5701   9
   1 -13   2 644.559 132.108  18
   1 -13   2 342.045 98.3487  13
  -1  13  -2 404.186 137.868  16
  -1  13  -3 330.653 232.090   5
   1 -13   3 474.734 83.5511   9
  -1  13  -3 512.947 179.912   2
   1 -13   3 503.283 106.362  13
  -1  13  -3 720.485 152.013  16
   1 -13   3 685.017 130.923  18
   1 -13   4 1125.25 111.307   9
   1 -13   4 957.609 132.440  13
  -1  13  -4 1276.32 195.576  16
   1 -13   4 1342.79 236.542  21
  -1  13  -4 1119.26 297.257   5
  -1  13  -4 1179.80 273.286   2
   1 -13   4 1401.37 158.954  18
   1 -13   5 656.994 121.362  13
   1 -13   5 879.647 133.292  18
  -1  13  -5 825.905 167.389  16
   1 -13   5 845.468 215.141  21
   1 -13   6 4814.30 281.774  13
   1 -13   6 5335.85 300.422  18
  -1  13  -6 5317.02 362.565  16
  -1  13  -7 993.659 114.478  11
  -1  13  -7 862.650 160.310  16
   1 -13   7 1120.44 148.580  13
   1 -13   7 1239.10 165.523  18
  -1  13  -8 3266.19 213.756  11
   1 -13   8 2943.53 230.524  13
   1 -13   8 3259.83 242.922  18
  -1  13  -8 3378.97 303.829  16
  -1  13  -9 3976.73 241.107  11
   1 -13   9 4008.62 268.830  18
  -1  13  -9 3914.65 313.223  16
   1 -13   9 3969.92 262.794  13
   1 -13  10 360.844 106.617  18
  -1  13 -10 375.497 130.782  16
   1 -13  10 601.440 120.610  13
  -1  13 -10 428.716 108.078  11
   1 -13  11 3631.64 254.988  13
   1 -13  11 3782.02 259.743  18
  -1  13 -11 3842.18 282.000  16
  -1  13 -11 4009.62 252.486  11
  -1  13 -12 2153.01 203.857  11
   1 -13  12 2375.04 216.601  13
   1 -13  12 1797.96 192.685  18
  -1  13 -12 2102.67 211.423  16
   1 -13  13 850.406 146.625  13
  -1  13 -13 841.298 134.031  11
   1 -13  13 848.953 135.156  18
   1 -13  14 297.830 103.905  18
  -1  13 -14 262.178 93.9626  11
   1 -13  14 251.546 96.4671  13
   1 -13  15 505.511 110.486  18
   1 -13  15 386.173 113.066  13
  -1  13 -15 488.725 122.353  11
   1 -13  16 245.007 86.4400  18
   1 -13  16 239.839 98.7106  13
  -1  13 -16 287.265 107.657  11
   1 -13  17 668.170 107.736  18
   1 -13  17 906.035 134.568  13
  -1  13 -17 594.243 110.808  11
  -1  13 -18 800.805 108.473  11
   1 -13  18 880.177 121.263  13
   1 -13  18 779.080 99.6878  18
  -1  13 -19 302.473 70.8925  11
   1 -13  19 413.361 73.5949  18
   1 -13  19 483.410 90.6830  13
  -1  13 -20 18.5372 44.7035  11
   1 -13  20 36.0099 47.1515  13
   1 -13  21 42.6278 38.5387  13
  -1  13 -21 39.2969 33.1302  11
  -1  12  16 17.0780 35.3898  17
   1 -12 -16 29.3851 35.6225  19
   1 -12 -15 75.1798 51.0746  19
  -1  12  15 82.5307 51.6261  17
   1 -12 -15 41.0167 35.7800  10
   1 -12 -14 387.080 70.9987  10
   1 -12 -14 321.895 71.9950  19
  -1  12  14 407.904 79.5333  17
   1 -12 -14 549.804 100.143  18
   1 -12 -13 187.185 79.8948  19
   1 -12 -13 150.907 56.1389  20
   1 -12 -13 212.915 94.0773  18
   1 -12 -13 172.394 62.6143  10
  -1  12  13 252.831 78.0228  17
   1 -12 -12 61.5359 64.3493  10
   1 -12 -12 135.934 98.3608  18
   1 -12 -12 287.387 75.2129  20
   1 -12 -12 301.611 100.838  19
   1 -12 -11 1356.63 139.784  20
   1 -12 -11 1314.23 129.560  15
   1 -12 -11 1459.56 174.958  19
   1 -12 -11 1263.88 166.282  18
   1 -12 -11 1108.67 131.131  10
   1 -12 -10 1695.95 161.246  20
   1 -12 -10 1722.38 183.454  18
   1 -12 -10 1803.37 188.824  19
   1 -12 -10 1762.61 168.699  10
   1 -12 -10 1832.63 149.045  15
   1 -12  -9 2015.82 216.560  18
   1 -12  -9 1894.62 154.941  15
   1 -12  -9 2162.14 185.882  10
   1 -12  -9 1836.94 206.379  19
   1 -12  -8 971.531 122.809  15
   1 -12  -8 887.630 128.242  10
   1 -12  -8 866.848 143.363  19
   1 -12  -8 1149.05 174.743  18
   1 -12  -8 748.709 125.122  13
   1 -12  -7 1234.68 175.192  19
   1 -12  -7 1248.61 150.335  13
  -1  12   7 1339.16 149.239  16
   1 -12  -7 1335.70 178.432  18
   1 -12  -7 1237.62 147.905  10
   1 -12  -7 1332.09 141.896  15
   1 -12  -6 612.185 114.847  10
   1 -12  -6 494.872 108.021  13
   1 -12  -6 705.892 106.900  15
   1 -12  -6 487.686 128.289  19
   1 -12  -6 547.397 129.249  18
  -1  12   6 488.012 101.523  16
   1 -12  -6 559.284 92.8678   9
   1 -12  -5 2737.92 211.882  13
  -1  12   5 2965.45 221.340  16
   1 -12  -5 3319.19 223.650  10
   1 -12  -5 3063.33 184.002  15
   1 -12  -5 3044.64 249.521  18
   1 -12  -5 2877.06 183.016   9
  -1  12   4 666.422 224.591   2
   1 -12  -4 348.439 162.171   3
   1 -12  -4 632.848 100.908   9
   1 -12  -4 744.218 125.161  13
   1 -12  -4 493.020 82.6830  15
  -1  12   4 577.110 120.433  16
   1 -12  -4 628.679 120.825  18
   1 -12  -3 120.324 80.9529  18
   1 -12  -3-9.56608 61.0013  15
   1 -12  -3 81.8654 75.1863  13
   1 -12  -3-0.68701 97.0921   3
  -1  12   3 75.1645 78.0526  16
   1 -12  -3 39.6882 67.8400   9
  -1  12   3-14.4211 132.362   5
  -1  12   2-242.787 199.839   5
   1 -12  -2 13.9803 70.8123  13
   1 -12  -2 19.5754 63.5106   9
   1 -12  -2-30.8276 94.5734   3
  -1  12   2 104.729 83.3505  16
   1 -12  -2 136.625 94.6599  18
  -1  12   2-234.000 160.716   2
   1 -12  -1 193.933 70.9472  13
  -1  12   1 242.892 177.493   5
  -1  12   1 192.403 85.2088  16
   1 -12  -1 318.385 85.1400   9
   1 -12  -1 60.4328 84.1655   3
   1 -12  -1 135.301 74.2725  18
  -1  12   1 109.267 133.985   2
  -1  12   0 1329.52 256.510   2
  -1  12   0 2046.86 195.705  16
   1 -12   0 1873.76 151.730   9
  -1  12   0 2191.09 438.204   5
   1 -12   0 1746.11 161.962  13
   1 -12   0 1760.10 164.349  18
   1 -12   1 5011.37 224.018   9
   1 -12   1 4689.36 258.778  13
  -1  12  -1 4492.39 579.576   5
  -1  12  -1 4253.71 451.887   2
  -1  12  -1 4529.29 309.836  16
   1 -12   1 4868.57 279.005  18
  -1  12  -2 1881.11 399.589   5
   1 -12   2 2081.27 144.111   9
  -1  12  -2 1828.09 206.433  16
   1 -12   2 2188.76 186.356  18
   1 -12   2 2051.66 271.613  21
   1 -12   2 1917.91 166.755  13
  -1  12  -2 2073.79 319.763   2
   1 -12   3 2498.63 315.671  21
  -1  12  -3 2905.56 376.092   2
   1 -12   3 3039.78 217.079  18
  -1  12  -3 3060.25 266.572  16
  -1  12  -3 2626.35 487.702   5
   1 -12   3 2593.57 198.004  13
   1 -12   4 685.056 117.103  18
   1 -12   4 599.401 108.948  13
  -1  12  -4 574.404 128.732  16
  -1  12  -4 197.807 131.700   2
   1 -12   4 471.591 161.023  21
  -1  12  -5 8368.36 627.814   2
  -1  12  -5 9817.75 478.013  16
   1 -12   5 9091.39 605.589  21
   1 -12   5 9729.07 381.158  13
  -1  12  -5 9058.63 828.520   5
   1 -12   5 9872.58 393.915  18
   1 -12   6-119.422 114.571  21
   1 -12   6 117.979 77.8245  18
  -1  12  -6-99.4689 186.619   5
  -1  12  -6-5.75347 112.239  16
   1 -12   6-36.5969 79.0079  13
  -1  12  -6 259.028 214.707   2
   1 -12   7 4023.00 424.288  21
  -1  12  -7 3838.91 538.309   5
  -1  12  -7 4505.05 328.235  16
  -1  12  -7 4593.79 243.132  11
   1 -12   7 3998.91 255.796  13
   1 -12   7 4801.48 277.538  18
  -1  12  -7 4087.25 474.510   2
  -1  12  -8 274.297 189.239   2
  -1  12  -8 304.494 313.371   5
  -1  12  -8 129.372 69.4655  11
  -1  12  -8 99.0340 116.743  16
   1 -12   8 170.883 96.8422  13
   1 -12   8 304.810 90.7519  18
   1 -12   8 334.513 160.998  21
  -1  12  -9 4255.91 533.200   5
  -1  12  -9 4191.69 253.127  11
  -1  12  -9 4772.20 495.783   2
   1 -12   9 3977.92 253.496  13
   1 -12   9 3879.49 406.960  21
  -1  12  -9 4309.39 318.237  16
   1 -12   9 3893.17 259.446  18
  -1  12 -10 1286.66 185.338  16
   1 -12  10 1501.91 169.134  13
  -1  12 -10 1304.15 157.868  11
  -1  12 -11 149.001 96.7967  11
   1 -12  11 94.5768 86.6620  13
  -1  12 -11 144.142 77.4698  14
  -1  12 -11 15.7117 98.5166  16
  -1  12 -12 2524.00 182.059  14
  -1  12 -12 3074.65 246.788  11
   1 -12  12 2999.10 240.912  13
  -1  12 -13 1630.20 184.899  11
   1 -12  13 1609.46 187.576  13
  -1  12 -13 1649.65 163.249  14
   1 -12  14 212.050 120.705  13
  -1  12 -14 118.280 80.8887  14
  -1  12 -14 280.451 118.080  11
  -1  12 -15 3977.34 269.495  11
   1 -12  15 3889.78 264.281  13
  -1  12 -15 3553.82 229.911  14
  -1  12 -16 986.936 134.528  14
   1 -12  16 1064.66 148.492  13
  -1  12 -16 1107.27 152.819  11
  -1  12 -17 2458.53 195.210  11
   1 -12  17 2094.29 195.529  13
  -1  12 -17 2043.19 179.208  14
  -1  12 -18 748.768 121.685  11
  -1  12 -18 532.180 104.943  14
   1 -12  18 795.525 125.729  13
   1 -12  19 617.940 104.955  13
  -1  12 -19 491.299 93.1410  11
  -1  12 -19 628.809 99.0944  14
   1 -12  20 414.665 83.6185  13
  -1  12 -20 319.251 68.2555  11
   1 -12  21-45.8619 49.9449  13
  -1  12 -21-50.6019 44.3131  11
   1 -12  22 305.758 48.8241  13
  -1  12 -22 326.426 43.4484  11
   1 -11 -17 3822.59 143.729  10
   1 -11 -17 4008.69 172.804  19
  -1  11  17 4176.97 171.945  17
  -1  11  16 1805.69 132.484  17
   1 -11 -16 1778.19 119.663  10
   1 -11 -16 1975.24 139.576  19
  -1  11  15 1747.57 143.526  17
   1 -11 -15 1874.89 158.573  19
   1 -11 -15 1765.61 140.467  10
   1 -11 -15 1973.69 169.973  18
   1 -11 -14 78.1613 76.8861  19
   1 -11 -14 97.0626 83.1889  18
   1 -11 -14 28.5630 67.2473  10
  -1  11  14 29.7856 76.6534  17
   1 -11 -13 195.832 105.604  18
   1 -11 -13 158.616 68.1484  20
   1 -11 -13 196.068 97.0292  19
   1 -11 -13 230.615 78.7264  10
   1 -11 -12 0.55023 94.6534  18
   1 -11 -12-223.387 82.9793  15
   1 -11 -12-120.274 77.4310  10
   1 -11 -12 73.9736 71.1331  20
   1 -11 -12 7.28514 80.7152  19
   1 -11 -11 244.823 83.2091  20
   1 -11 -11 328.778 122.710  18
   1 -11 -11 97.4169 75.9569  15
   1 -11 -11 187.428 89.1127  10
   1 -11 -11 382.825 114.888  19
   1 -11 -10 77.7653 83.0600  19
   1 -11 -10 51.1656 98.7104  18
   1 -11 -10 32.3365 74.1830  10
   1 -11 -10 99.5850 83.4773  20
   1 -11 -10 10.2189 83.7546  15
   1 -11  -9 1704.95 173.943  10
   1 -11  -9 1934.53 163.165  15
   1 -11  -9 1844.94 205.943  19
   1 -11  -9 1774.15 195.352  18
   1 -11  -8 1843.01 200.954  19
   1 -11  -8 1834.90 178.777  10
   1 -11  -8 2108.40 189.017  13
   1 -11  -8 2077.47 212.907  18
   1 -11  -8 1930.10 156.682  15
   1 -11  -7 245.504 83.5934  10
  -1  11   7 229.925 67.9833  16
   1 -11  -7 285.650 101.495  19
   1 -11  -7 293.097 113.029  18
   1 -11  -7 358.006 88.7200  15
   1 -11  -7 293.947 99.1371  13
   1 -11  -7 227.070 77.2143   9
   1 -11  -6 662.861 128.736  19
  -1  11   6 583.774 203.976   2
   1 -11  -6 785.204 126.991  13
   1 -11  -6 765.886 99.2432   9
   1 -11  -6 1051.40 133.348  10
   1 -11  -6 947.494 235.796   3
  -1  11   6 637.215 109.368  16
   1 -11  -6 680.920 138.854  18
   1 -11  -6 806.820 104.348  15
   1 -11  -5 366.338 110.597  18
  -1  11   5 198.171 78.3315  16
   1 -11  -5 117.878 69.0107  13
   1 -11  -5 422.979 89.8622   9
   1 -11  -5 254.706 74.5171  15
  -1  11   5 138.142 127.823   5
  -1  11   5 238.427 180.018   2
   1 -11  -5 394.721 150.201   3
   1 -11  -4 18.0279 68.8294   9
  -1  11   4 113.499 71.0675  16
  -1  11   4 47.3906 112.019   2
   1 -11  -4 142.959 99.1715  18
  -1  11   4 234.346 183.806   5
   1 -11  -4 39.6006 66.6919  13
   1 -11  -4 63.8858 121.553   3
   1 -11  -4 188.507 73.5161  15
   1 -11  -3 345.062 142.758   3
  -1  11   3 265.370 125.174   2
  -1  11   3 243.317 162.877   5
   1 -11  -2 2920.19 326.292   3
  -1  11   2 2690.45 399.320   5
  -1  11   2 3259.87 391.077   2
  -1  11   1 579.643 217.019   5
  -1  11   1 232.953 170.378   2
   1 -11  -1 181.538 92.8607   3
   1 -11   0 16325.1 711.026   3
  -1  11   0 16456.9 836.376   2
   1 -11   1 7308.28 460.649   3
  -1  11  -1 7445.81 554.520   2
   1 -11   1 6867.50 443.010  21
   1 -11   2 3973.70 360.161  21
  -1  11  -2 3815.90 408.890   2
  -1  11  -3 1620.60 275.064   2
   1 -11   3 890.932 200.673  21
   1 -11   4 355.619 139.839  21
  -1  11  -4 340.752 140.557   2
  -1  11  -5 2353.61 340.824   2
   1 -11   5 2035.97 292.156  21
  -1  11  -6 1786.85 311.173   2
   1 -11   6 1303.84 238.724  21
   1 -11   7 6986.64 544.068  21
  -1  11  -7 7339.48 583.811   2
   1 -11   8 5464.04 469.664  21
  -1  11  -8 5412.61 509.115   2
   1 -11   9 382.764 94.0210  13
   1 -11   9 780.163 204.034  21
  -1  11  -9 619.494 115.664  11
  -1  11  -9 148.540 143.233   2
  -1  11  -9 191.815 173.876   5
  -1  11 -10 703.871 250.782   5
  -1  11 -10 918.449 114.437  14
  -1  11 -10 854.241 273.437   2
   1 -11  10 1149.76 250.602  21
   1 -11  10 930.651 138.055  13
  -1  11 -10 949.686 144.299  11
   1 -11  11 9082.63 385.313  13
  -1  11 -11 9731.93 745.543   2
  -1  11 -11 9490.70 404.219  11
   1 -11  11 9329.66 624.229  21
  -1  11 -11 8516.71 343.080  14
   1 -11  12 552.278 114.276  13
  -1  11 -12 563.626 102.862  14
  -1  11 -12 565.195 137.938  11
  -1  11 -13 298.581 124.291  11
  -1  11 -13 306.444 99.2418  14
   1 -11  13 177.275 97.2039  13
  -1  11 -14 633.474 122.097  14
   1 -11  14 827.939 148.704  13
  -1  11 -14 543.697 139.954  11
  -1  11 -15 3912.98 273.828  11
   1 -11  15 3636.20 261.835  13
  -1  11 -15 3742.57 249.276  14
   1 -11  16 487.788 139.934  13
  -1  11 -16 464.580 124.091  11
  -1  11 -16 410.857 95.8554  14
   1 -11  17 2116.10 192.477  13
  -1  11 -17 2217.08 202.099  11
  -1  11 -17 2039.14 178.954  14
  -1  11 -18 3631.23 234.508  11
   1 -11  18 3555.19 234.725  13
  -1  11 -18 3340.39 230.944  14
  -1  11 -19 849.943 120.995  14
  -1  11 -19 577.572 105.320  11
   1 -11  19 701.937 117.432  13
  -1  11 -20 1391.06 137.071  14
  -1  11 -20 1328.65 127.025  11
   1 -11  20 1495.09 144.642  13
  -1  11 -21 480.703 78.0896  11
   1 -11  21 550.901 85.8384  13
  -1  11 -21 360.065 75.1247  14
  -1  11 -22 72.2357 32.6908  11
   1 -11  22 61.1306 41.1073  13
   1 -10 -18 4.75363 46.3728  19
   1 -10 -18 68.0225 39.8672  10
  -1  10  18 60.9259 46.8292  17
   1 -10 -17 2520.81 164.688  19
  -1  10  17 2872.97 167.776  17
   1 -10 -17 2429.69 149.678  10
   1 -10 -16 200.296 80.0109  19
   1 -10 -16 95.6657 62.1836  10
  -1  10  16 308.450 80.9543  17
   1 -10 -15 164.282 87.2098  19
  -1  10  15-88.9736 89.6290  17
   1 -10 -15 120.772 77.1469  10
   1 -10 -15 124.140 91.1913  18
   1 -10 -14 284.620 106.935  18
   1 -10 -14 134.616 89.5653  19
   1 -10 -14 283.452 76.7960  20
  -1  10  14 210.355 95.9535  17
   1 -10 -14 279.875 89.3871  10
   1 -10 -13 103.671 74.7233  20
   1 -10 -13-31.2379 97.8481  18
   1 -10 -13 37.3281 78.9435  10
   1 -10 -13 63.7892 85.6284  19
   1 -10 -13 27.6430 78.1539  15
   1 -10 -12 540.993 143.724  18
   1 -10 -12 360.799 95.8796  15
   1 -10 -12 494.345 126.580  19
   1 -10 -12 448.338 98.9927  20
   1 -10 -12 499.611 113.174  10
   1 -10 -11 171.755 87.2472  10
   1 -10 -11 81.1143 104.324  18
   1 -10 -11-99.0731 111.944  19
   1 -10 -11 54.5570 70.9939  20
   1 -10 -11 91.5965 82.7887  15
   1 -10 -10 49.9941 109.687  18
   1 -10 -10 51.5598 76.4156  15
   1 -10 -10 247.177 91.8676  10
   1 -10 -10 26.2663 87.8454  19
   1 -10  -9 536.757 98.4158  15
   1 -10  -9 465.879 130.108  19
   1 -10  -9 648.174 111.773  13
   1 -10  -9 390.910 101.660  10
   1 -10  -9 523.427 128.321  18
   1 -10  -8 7290.49 339.856  10
   1 -10  -8 6854.94 322.701  13
   1 -10  -8 7245.22 293.825  15
  -1  10   8 6601.77 577.800   2
   1 -10  -8 7112.70 365.676  18
   1 -10  -8 7322.76 593.945   3
   1 -10  -8 7743.36 380.985  19
   1 -10  -8 7281.94 273.475   9
   1 -10  -7 150.083 70.6714   9
   1 -10  -7 142.525 67.9997  15
   1 -10  -7 26.9757 77.9095  19
   1 -10  -7 176.529 88.9905  13
   1 -10  -7 12.9674 128.685   3
  -1  10   7 384.157 203.096   2
   1 -10  -7 193.232 102.329  18
   1 -10  -7 153.186 75.9015  10
   1 -10  -6 237.141 96.6007  18
   1 -10  -6-87.3803 132.822   3
  -1  10   6 235.003 166.969   2
  -1  10   5 1133.35 232.778   2
  -1  10   5 1558.00 261.184   5
   1 -10  -5 1375.98 267.280   3
  -1  10   4 1240.56 267.110   5
  -1  10   4 1515.34 283.116   2
   1 -10  -4 1556.99 256.768   3
   1 -10  -3 9366.96 580.956   3
  -1  10   3 8463.02 603.527   2
  -1  10   3 7795.85 627.842   5
  -1  10   2 713.720 226.539   5
  -1  10   2 1395.37 260.969   2
   1 -10  -2 1306.76 226.586   3
   1 -10  -1 173.514 98.5256   3
  -1  10   1 217.341 125.205   2
   1 -10   0 4078.48 328.515   3
  -1  10   0 3435.33 368.208   2
   1 -10   0 4072.62 317.079  21
  -1  10  -1 9356.92 607.562   2
   1 -10   1 10781.4 533.062  21
   1 -10   1 10386.9 507.242   3
  -1  10  -2 193.927 135.627   2
   1 -10   2 304.938 122.753  21
   1 -10   2 333.882 106.804   3
   1 -10   3 446.175 152.887  21
   1 -10   3 436.750 109.410   3
  -1  10  -3 118.642 117.826   2
   1 -10   4 4299.02 376.013  21
  -1  10  -4 3868.30 404.520   2
  -1  10  -5 1840.71 290.712   2
  -1  10  -5 2246.50 267.817   1
   1 -10   5 1836.50 263.480  21
  -1  10  -6 587.661 173.756   2
   1 -10   6 627.307 169.175  21
  -1  10  -7 1653.87 277.102   2
   1 -10   7 1705.55 255.245  21
  -1  10  -8 4320.06 452.874   2
   1 -10   8 4675.87 436.546  21
  -1  10  -9 7723.34 618.414   2
   1 -10   9 8404.27 568.861  21
   1 -10  10 12415.0 698.272  21
  -1  10 -10 13017.1 799.858   2
   1 -10  10 12303.7 808.532   6
   1 -10  11 4675.59 436.317  21
   1 -10  11 5077.08 271.966  13
   1 -10  11 4288.44 501.720   6
  -1  10 -11 5315.37 304.972  11
  -1  10 -11 4804.82 515.413   2
   1 -10  12 152.567 127.051  21
   1 -10  12 108.993 127.391   6
  -1  10 -12 140.291 94.3515  11
  -1  10 -12 84.4214 68.4250  14
  -1  10 -12-217.311 167.138   2
   1 -10  12 70.8622 84.9919  13
  -1  10 -13 34.6648 106.093  11
   1 -10  13-9.29550 80.2074  13
  -1  10 -13 3.09806 76.7627  14
   1 -10  13-31.0320 140.287  21
   1 -10  13-116.662 152.875   6
  -1  10 -14 330.308 125.802  11
  -1  10 -14 201.905 89.0333  14
   1 -10  14 413.467 116.182  13
  -1  10 -15 2295.42 219.743  11
  -1  10 -15 2150.00 198.627  14
   1 -10  15 2275.94 201.098  13
   1 -10  16 1634.94 185.404  13
  -1  10 -16 1536.03 178.764  11
  -1  10 -16 1742.67 183.409  14
   1 -10  17 378.338 113.296  13
  -1  10 -17 526.487 117.807  14
  -1  10 -17 281.608 113.801  11
   1 -10  18 686.332 125.688  13
  -1  10 -18 779.626 131.643  11
  -1  10 -18 860.601 138.845  14
  -1  10 -19 2842.49 211.361  14
  -1  10 -19 3533.74 216.510  11
   1 -10  19 3176.65 218.151  13
  -1  10 -20 114.053 70.5581  11
   1 -10  20 184.975 81.1293  13
  -1  10 -20 110.256 80.0218  14
   1 -10  21 1031.32 113.365  13
  -1  10 -21 1159.72 126.080  14
  -1  10 -21 1112.51 107.099  11
   1 -10  22 373.591 67.9507  13
  -1  10 -22 262.010 71.7542  14
  -1  10 -22 252.521 53.3309  11
  -1  10 -23 832.646 81.0521  14
   1 -10  23 933.967 76.5172  13
   1  -9 -19 575.333 73.6709  10
   1  -9 -19 638.984 80.2457  19
  -1   9  19 604.785 75.1403  17
   1  -9 -18 1681.22 139.441  19
  -1   9  18 1770.57 133.755  17
   1  -9 -18 1635.64 132.980  10
  -1   9  17 1401.77 137.814  17
   1  -9 -17 1569.93 155.889  19
   1  -9 -17 1253.98 133.809  10
  -1   9  16 2984.51 211.004  17
   1  -9 -16 3117.86 212.557  10
   1  -9 -16 2964.10 221.249  19
   1  -9 -15 2033.92 207.515  18
   1  -9 -15 1684.82 173.906  10
   1  -9 -15 2066.84 205.290  19
  -1   9  15 2142.42 192.960  17
   1  -9 -14 3361.21 242.809  10
   1  -9 -14 3449.13 266.204  19
   1  -9 -14 3978.63 280.435  18
   1  -9 -14 3295.60 196.101  15
   1  -9 -13 60.9868 95.0037  18
   1  -9 -13 25.1157 80.1389  15
   1  -9 -13-3.44672 75.7320  20
   1  -9 -13 114.017 90.1022  19
   1  -9 -13 86.8668 84.5707  10
   1  -9 -12 589.237 110.789  15
   1  -9 -12 462.250 100.207  20
   1  -9 -12 537.138 115.570  10
   1  -9 -12 590.351 143.177  18
   1  -9 -12 622.424 122.619  19
   1  -9 -11 4514.28 305.305  19
   1  -9 -11 4631.87 258.473  20
   1  -9 -11 4708.10 245.351  15
   1  -9 -11 4621.29 282.999  10
   1  -9 -11 5275.79 322.853  18
   1  -9 -10 11430.8 384.625  15
   1  -9 -10 11693.2 751.635   3
   1  -9 -10 11553.8 478.095  19
  -1   9  10 9880.60 699.685   2
   1  -9 -10 11699.3 448.409  10
  -1   9  10 10539.8 773.627   6
   1  -9 -10 12457.5 490.736  18
  -1   9   9 3448.12 442.974   6
  -1   9   9 3667.33 411.107   2
   1  -9  -9 3411.07 176.449   9
   1  -9  -9 3723.45 208.665  15
   1  -9  -9 3788.15 424.797   3
   1  -9  -9 3590.47 260.923  19
   1  -9  -9 3749.69 239.047  10
   1  -9  -9 3547.81 259.506  18
   1  -9  -9 3208.69 212.624  13
  -1   9   8 2911.76 363.179   2
   1  -9  -8 3008.76 384.889   3
   1  -9  -8 3309.02 242.175  18
   1  -9  -8 2998.57 181.151  15
  -1   9   7 1495.11 266.768   2
   1  -9  -7 1877.60 313.989   3
  -1   9   6 96.2255 113.333   2
  -1   9   6 91.1004 107.986   5
   1  -9  -6 247.008 164.678   3
  -1   9   5 14152.3 761.889   2
  -1   9   5 14138.8 759.082   5
   1  -9  -5 14665.6 758.477   3
  -1   9   4 157.632 143.677   2
  -1   9   4 198.188 131.314   5
   1  -9  -4 190.852 97.0496   3
  -1   9   3 16294.2 784.555   2
   1  -9  -3 18168.5 773.560   3
  -1   9   2 10127.2 593.670   2
   1  -9  -2 10376.7 550.106   3
   1  -9  -1 16260.3 680.596   3
   1  -9  -1 17644.1 615.522  21
  -1   9   1 17074.0 770.673   2
  -1   9   0 7258.68 498.922   2
   1  -9   0 7334.35 425.166   3
   1  -9   0 7586.81 407.706  21
   1  -9   1 227.202 84.9153   3
  -1   9  -1 311.247 127.680   2
   1  -9   1 150.295 103.496  21
   1  -9   2 3742.33 312.694  21
  -1   9  -2 3544.61 343.829   2
   1  -9   2 4138.26 287.507   3
   1  -9   3 265.315 112.117  21
  -1   9  -3 200.732 135.019   2
   1  -9   3 236.792 79.6115   3
   1  -9   4 5336.33 309.933   3
  -1   9  -4 5496.30 436.255   2
   1  -9   4 5219.32 396.358  21
  -1   9  -5 257.058 118.766   2
  -1   9  -5 279.604 103.720   1
   1  -9   5 124.084 95.1249  21
   1  -9   6 11554.8 599.516  21
  -1   9  -6 11016.5 642.857   2
  -1   9  -6 11343.6 545.209   1
   1  -9   7 427.107 153.365  21
   1  -9   7 345.632 150.935   6
  -1   9  -7 242.917 156.955   2
  -1   9  -7 264.429 118.835   1
  -1   9  -8 1837.15 296.040   2
   1  -9   8 1986.34 305.542   6
   1  -9   8 2123.53 271.278  21
  -1   9  -9 186.828 137.020   2
   1  -9   9 245.497 128.867   6
   1  -9   9 554.615 164.136  21
   1  -9  10 8631.71 655.628   6
  -1   9 -10 8581.49 637.829   2
   1  -9  10 9454.56 578.961  21
  -1   9 -11-154.277 120.221   2
   1  -9  11 148.092 128.104  21
   1  -9  11-63.2951 160.413   6
   1  -9  12 3243.79 351.904  21
  -1   9 -12 3490.95 253.124  11
  -1   9 -12 3474.04 450.205   2
   1  -9  12 3211.48 432.008   6
   1  -9  13 6328.65 481.663  21
   1  -9  13 6850.78 628.997   6
  -1   9 -13 6595.10 319.404  14
  -1   9 -13 7200.08 359.950  11
  -1   9 -13 7175.75 628.701   2
   1  -9  13 7032.54 325.529  13
  -1   9 -14 135.735 99.0538  11
  -1   9 -14 50.1004 70.1988  19
   1  -9  14 101.596 87.2940  13
  -1   9 -14 104.402 89.4790  14
   1  -9  14 4.13053 149.429   6
  -1   9 -15 1775.40 200.213  11
  -1   9 -15 1745.22 181.004  14
  -1   9 -15 1637.17 186.792  19
   1  -9  15 2059.43 197.655  13
   1  -9  16 821.466 138.092  13
  -1   9 -16 675.894 126.293  14
  -1   9 -16 637.701 135.251  11
  -1   9 -17 210.721 104.437  14
   1  -9  17 278.706 107.047  13
  -1   9 -17 285.215 110.568  11
  -1   9 -18 457.951 114.050  11
  -1   9 -18 679.559 132.730  14
   1  -9  18 458.431 120.564  13
  -1   9 -19 5003.73 265.821  11
  -1   9 -19 5189.49 295.407  14
   1  -9  19 5097.74 284.283  13
  -1   9 -20 904.049 115.517  11
   1  -9  20 1139.86 136.238  13
  -1   9 -20 1089.03 136.593  14
  -1   9 -21 1338.29 142.683  14
   1  -9  21 1479.42 135.763  13
  -1   9 -21 1380.92 117.682  11
   1  -9  22 2168.25 144.140  13
  -1   9 -22 1772.60 108.691  11
  -1   9 -22 1889.40 146.550  14
  -1   9 -23 134.606 55.6424  14
   1  -9  23 132.602 50.2100  13
   1  -8 -20 302.987 59.6080  10
   1  -8 -20 299.145 69.6002  19
  -1   8  20 352.575 60.1467  17
  -1   8  19 353.627 72.2596  17
   1  -8 -19 344.003 55.3077  12
   1  -8 -19 349.690 78.3591  19
   1  -8 -19 294.590 75.3229  10
   1  -8 -18 173.807 76.8129  10
  -1   8  18 30.2992 73.5373  17
   1  -8 -18 92.6469 55.0840  12
   1  -8 -18 84.8568 72.6724  19
   1  -8 -17 128.159 83.3883  19
   1  -8 -17 19.1305 77.3161  10
  -1   8  17 157.763 80.7254  17
  -1   8  16 1259.59 151.666  17
   1  -8 -16 966.730 139.751  10
   1  -8 -16 1408.72 179.499  18
   1  -8 -16 1306.16 172.270  19
  -1   8  15 5066.98 299.437  17
   1  -8 -15 5583.66 330.233  19
   1  -8 -15 5049.52 305.232  10
   1  -8 -15 5527.72 332.097  18
   1  -8 -14 15715.2 572.781  19
   1  -8 -14 16107.9 586.022  18
   1  -8 -14 15230.5 450.124  15
   1  -8 -14 15838.1 551.346  10
   1  -8 -13 6082.11 330.501  10
   1  -8 -13 6091.44 282.898  20
   1  -8 -13 5919.78 344.363  19
   1  -8 -13 6190.02 359.494  18
   1  -8 -13 6343.36 277.664  15
   1  -8 -12 6605.75 362.780  18
   1  -8 -12 6583.41 339.409  10
   1  -8 -12 6196.48 350.323  19
   1  -8 -12 5997.61 285.709  20
   1  -8 -12 5896.20 270.020  15
   1  -8 -11 110.933 82.8029  10
   1  -8 -11 118.741 79.4613  15
   1  -8 -11 130.376 94.7562  18
   1  -8 -11 339.813 169.192   3
  -1   8  11 291.122 202.944   6
  -1   8  11 182.046 125.781   2
   1  -8 -11 123.853 76.8786  19
   1  -8 -11 199.514 76.5582  20
  -1   8  10 8931.46 653.904   2
   1  -8 -10 10908.3 444.703  19
   1  -8 -10 10594.8 706.474   3
   1  -8 -10 10395.8 437.456  18
   1  -8 -10 10664.5 414.746  10
  -1   8  10 9671.63 732.148   6
   1  -8 -10 10747.7 354.818  15
  -1   8   9 12930.5 778.199   2
   1  -8  -9 14769.3 820.558   3
  -1   8   9 14958.4 885.030   6
  -1   8   8 1951.58 298.850   2
   1  -8  -8 2462.04 336.577   3
  -1   8   7 6325.43 518.642  22
  -1   8   7 6218.22 499.421   2
   1  -8  -7 6733.32 528.362   3
  -1   8   6 1597.14 230.032   5
  -1   8   6 1524.83 261.590  22
   1  -8  -6 1619.32 253.598   3
  -1   8   6 1828.11 258.993   2
  -1   8   5 10114.3 613.629  22
   1  -8  -5 11777.6 636.013   3
  -1   8   5 11624.5 636.187   2
  -1   8   5 9851.17 601.363   5
  -1   8   4 23602.7 907.647  22
  -1   8   4 23872.8 930.915   2
   1  -8  -4 26232.4 940.670   3
   1  -8  -3 7269.57 457.569   3
  -1   8   3 7006.16 466.322   2
  -1   8   3 6535.05 434.318  22
   1  -8  -2 38953.8 1096.75   3
  -1   8   2 37986.3 1150.35   2
   1  -8  -2 38876.1 891.498  21
   1  -8  -1 6588.39 390.796   3
  -1   8   1 6632.43 439.569   2
   1  -8  -1 6457.57 334.762  21
  -1   8   0 176.982 107.919   2
   1  -8   0 368.300 108.299   3
   1  -8   0 185.237 68.4017  21
   1  -8   1 2561.10 245.804  21
   1  -8   1 2762.02 236.193   3
  -1   8  -1 2642.21 288.813   2
   1  -8   2 15777.4 618.483  21
  -1   8  -2 15649.5 686.564   2
   1  -8   2 15582.6 547.475   3
   1  -8   3 6448.02 325.984   3
   1  -8   3 6344.19 400.375  21
  -1   8  -3 6187.85 427.774   2
   1  -8   4 6095.78 400.780  21
  -1   8  -4 6255.83 435.956   2
   1  -8   4 6786.71 320.167   3
  -1   8  -5 2882.00 305.562   2
   1  -8   5 3039.46 289.304  21
  -1   8  -5 2456.34 239.301   1
   1  -8   5 2660.88 194.743   3
  -1   8  -6 12677.4 546.613   1
   1  -8   6 14140.5 640.556  21
  -1   8  -6 13621.0 675.138   2
   1  -8   6 13406.0 698.207   6
  -1   8  -7 2959.25 327.396   2
   1  -8   7 3205.75 307.040  21
  -1   8  -7 2661.20 242.291   1
   1  -8   7 3064.46 341.695   6
  -1   8  -8 335.755 111.610   1
  -1   8  -8 458.496 173.449   2
   1  -8   8 281.708 134.595  21
   1  -8   8 310.968 139.158   6
  -1   8  -9 134.698 129.798   2
   1  -8   9 85.5980 96.8975  21
   1  -8   9 71.4991 115.457   6
   1  -8  10 1662.80 298.233   6
   1  -8  10 1669.70 240.399  21
  -1   8 -10 1670.03 287.443   2
  -1   8 -11 2124.50 339.440   2
   1  -8  11 1651.12 310.146   6
   1  -8  11 2003.51 270.270  21
   1  -8  12 4714.43 505.277   6
  -1   8 -12 4858.88 503.014   2
   1  -8  12 4989.14 403.333  21
   1  -8  13 5795.83 571.596   6
  -1   8 -13 5376.77 543.729   2
   1  -8  13 5670.06 437.574  21
  -1   8 -14 1231.24 151.585  14
  -1   8 -14 1431.16 164.729  19
   1  -8  14 1378.80 215.332  21
   1  -8  14 1918.94 331.043   6
  -1   8 -14 1638.72 180.139  11
   1  -8  15 2824.06 425.446   6
  -1   8 -15 2565.13 216.932  14
  -1   8 -15 2628.47 221.640  11
  -1   8 -15 2318.50 215.314  19
   1  -8  15 2685.13 287.372  21
  -1   8 -16 4759.76 286.656  11
  -1   8 -16 4371.18 279.992  14
   1  -8  16 4535.82 268.918  13
  -1   8 -16 4361.68 291.220  19
  -1   8 -17 1584.20 192.368  19
  -1   8 -17 1473.78 163.208  11
  -1   8 -17 1445.67 172.042  14
   1  -8  17 1592.68 176.317  13
   1  -8  18 2115.39 192.803  13
  -1   8 -18 2041.53 184.640  11
  -1   8 -18 2037.87 212.950  19
  -1   8 -18 2111.30 200.595  14
   1  -8  19 46.0524 79.1948  13
  -1   8 -19 6.86783 77.0054  11
  -1   8 -19 32.9927 91.1454  14
  -1   8 -19 55.6700 87.1172  19
  -1   8 -20 7068.50 338.144  14
  -1   8 -20 6916.20 355.022  19
  -1   8 -20 6770.20 290.661  11
   1  -8  20 7658.73 322.923  13
   1  -8  21 220.619 82.4942  13
  -1   8 -21 158.040 74.3580  14
  -1   8 -21 201.965 61.0679  11
  -1   8 -22 156.357 65.2964  14
   1  -8  22 174.845 68.7468  13
   1  -8  23 821.664 81.6476  13
  -1   8 -23 948.274 99.4462  14
   1  -8  24 841.464 62.8675  13
  -1   8 -24 751.365 75.2793  14
   1  -7 -21 197.375 40.3007  12
   1  -7 -21 141.895 50.4207  19
  -1   7  21 162.485 45.9117  17
   1  -7 -20 1209.77 123.184  19
  -1   7  20 899.182 93.8666  17
   1  -7 -20 977.343 84.5529  12
   1  -7 -20 1173.40 117.774  10
   1  -7 -19 13.0867 53.5836  12
   1  -7 -19-86.0657 72.2134  19
  -1   7  19 44.8731 70.1404  17
   1  -7 -19-27.4393 72.4966  10
  -1   7  18 605.860 105.248  17
   1  -7 -18 530.010 73.1694   8
   1  -7 -18 525.174 115.230  19
   1  -7 -18 562.531 114.608  10
   1  -7 -17 120.896 101.878  10
   1  -7 -17-59.7139 65.2714   8
   1  -7 -17 120.355 94.3820  19
  -1   7  17 32.1642 74.4824  17
   1  -7 -16 1804.59 192.555  19
  -1   7  16 1887.84 183.242  17
   1  -7 -16 1719.75 135.055   8
   1  -7 -16 1758.15 186.600  10
   1  -7 -16 1908.14 200.720  18
   1  -7 -15 9198.64 410.717  10
   1  -7 -15 7914.90 297.207   8
   1  -7 -15 8394.10 314.025  15
   1  -7 -15 9047.01 427.437  18
   1  -7 -15 8700.48 415.425  19
   1  -7 -14 320.716 80.6165   8
   1  -7 -14 229.124 101.083  10
   1  -7 -14 212.595 75.8449  15
   1  -7 -14 286.360 133.270  18
   1  -7 -14 253.497 118.656  19
   1  -7 -13 19224.3 641.565  18
   1  -7 -13 18675.3 511.930  15
   1  -7 -13 19448.9 639.181  19
   1  -7 -13 19795.4 614.323  10
   1  -7 -12 20091.0 640.769  18
   1  -7 -12 18958.6 515.024  15
   1  -7 -12 20409.3 644.126  19
   1  -7 -12 21224.9 621.114  10
   1  -7 -12 19878.7 536.337  20
   1  -7 -12 20193.7 975.987   3
  -1   7  12 19606.7 1051.61   6
   1  -7 -11 10625.2 437.003  19
   1  -7 -11 10765.7 694.457   3
  -1   7  11 10504.6 751.372   6
   1  -7 -11 10759.7 439.278  18
   1  -7 -11 9850.54 346.058  15
   1  -7 -10 7090.69 543.847   3
  -1   7  10 6860.52 597.206   6
   1  -7  -9 7382.10 542.760   3
  -1   7   9 6861.67 578.977   6
  -1   7   8 263.952 178.913  22
   1  -7  -8-3.73599 117.933   3
   1  -7  -7 8842.43 570.017   3
  -1   7   7 7687.05 559.975  22
  -1   7   6 600.357 171.487   2
  -1   7   6 395.536 136.954   5
   1  -7  -6 666.260 182.771   3
  -1   7   6 546.748 176.482  22
  -1   7   5 4988.93 391.066   2
  -1   7   5 4372.52 397.405  22
   1  -7  -5 5350.90 413.593   3
   1  -7  -4 822.829 163.080   3
  -1   7   4 904.059 186.749   2
  -1   7   4 670.346 182.534  22
  -1   7   3 6907.38 412.444  22
  -1   7   3 6874.83 439.618   2
   1  -7  -3 7821.43 441.722   3
   1  -7  -3 7038.79 288.132  21
   1  -7  -2 39364.7 1027.50   3
   1  -7  -2 37797.2 833.614  21
  -1   7   1 14557.6 618.276   2
   1  -7  -1 16070.3 583.092   3
   1  -7  -1 15476.3 504.201  21
  -1   7   0 342.926 110.905   2
   1  -7   0 547.218 100.275  21
   1  -7   0 547.126 119.197   3
  -1   7  -1 7491.18 428.253   2
   1  -7   1 7187.06 351.846   3
   1  -7   1 8206.10 391.996  21
   1  -7   2 874.225 144.715  21
   1  -7   2 1012.08 128.235   3
  -1   7  -2 701.920 143.059   2
  -1   7  -3 420.705 131.135   2
   1  -7   3 236.984 64.6728   3
   1  -7   3 278.270 98.1917  21
   1  -7   4 4061.63 303.537  21
  -1   7  -4 3680.45 307.570   2
   1  -7   4 4206.66 232.979   3
   1  -7   4 4234.81 342.843   6
  -1   7  -5 23721.2 834.290   2
   1  -7   5 23894.7 785.858  21
  -1   7  -5 24161.8 728.756   1
   1  -7   5 23140.7 853.580   6
   1  -7   5 23878.8 589.545   3
   1  -7   6 622.000 145.988  21
   1  -7   6 734.878 93.6601   3
  -1   7  -6 677.524 87.9719   4
  -1   7  -6 571.322 156.132   2
   1  -7   6 712.189 171.779   6
  -1   7  -6 657.014 119.016   1
  -1   7  -7 22449.6 712.074   1
  -1   7  -7 24164.5 641.836   4
  -1   7  -7 24268.0 891.539   2
   1  -7   7 23624.5 907.214   6
   1  -7   7 23849.5 798.143  21
  -1   7  -8 5236.65 330.334   1
  -1   7  -8 5251.78 428.464   2
  -1   7  -8 5576.99 317.407   4
   1  -7   8 5214.58 431.504   6
   1  -7   8 5576.59 375.758  21
   1  -7   9 14320.8 745.827   6
   1  -7   9 14558.0 631.199  21
  -1   7  -9 13155.7 542.921   1
  -1   7  -9 15615.3 757.834   2
  -1   7  -9 15442.6 588.637   4
   1  -7  10 401.972 154.049   6
  -1   7 -10 322.791 126.869   4
  -1   7 -10 817.472 219.513   2
   1  -7  10 384.981 135.304  21
  -1   7 -11 6142.39 523.156   2
   1  -7  11 5136.32 486.112   6
   1  -7  11 5230.58 385.286  21
  -1   7 -11 6083.02 417.735   4
   1  -7  12 9329.29 524.130  21
  -1   7 -12 9884.27 696.997   2
  -1   7 -12 9741.25 564.956   4
   1  -7  12 9187.57 668.646   6
   1  -7  13 3083.38 299.873  21
   1  -7  13 2612.63 382.607   6
  -1   7 -13 3118.12 351.696   4
  -1   7 -14 5100.13 281.104  14
  -1   7 -14 5169.98 284.293  11
  -1   7 -14 4934.00 291.747  19
   1  -7  14 4773.80 528.179   6
  -1   7 -14 4544.93 421.050   4
   1  -7  14 4829.56 369.538  21
  -1   7 -15 499.440 114.775  19
  -1   7 -15 462.044 108.295  11
  -1   7 -15 712.102 138.300  14
   1  -7  15 572.541 207.575   6
  -1   7 -15 835.309 207.744   4
  -1   7 -16 1215.13 157.399  11
  -1   7 -16 1379.87 167.483  14
  -1   7 -16 1238.25 165.188  19
  -1   7 -17 7267.11 343.046  11
  -1   7 -17 6806.11 368.964  19
  -1   7 -17 7271.54 361.643  14
  -1   7 -18 1893.68 207.856  19
  -1   7 -18 1953.74 199.854  14
  -1   7 -18 1613.03 169.610  11
  -1   7 -19 175.943 93.6267  11
  -1   7 -19 170.100 97.4436  19
  -1   7 -19 196.201 105.166  14
  -1   7 -20 1977.11 156.391  11
   1  -7  20 2097.96 179.113  13
  -1   7 -20 2123.73 194.206  14
  -1   7 -20 2132.59 204.464  19
  -1   7 -21 962.758 142.211  19
   1  -7  21 938.997 117.884  13
  -1   7 -21 989.085 134.833  14
  -1   7 -22-43.9261 65.9852  19
  -1   7 -22-6.35561 69.8459  14
   1  -7  22 94.9513 59.9962  13
  -1   7 -23 2134.00 149.552  14
   1  -7  23 2500.77 137.434  13
  -1   7 -24 656.097 73.4366  14
   1  -7  24 637.355 59.3985  13
   1  -6 -22 69.3052 43.7427  19
  -1   6  22 32.8626 30.4640  17
   1  -6 -22-7.38032 33.0070  12
  -1   6  21 21.0095 44.7666  17
   1  -6 -21 63.5883 45.0990  12
   1  -6 -21-7.95704 57.6319  19
   1  -6 -20 1086.09 130.428  10
   1  -6 -20 1009.81 85.1579   8
   1  -6 -20 1037.58 133.120  19
  -1   6  20 1007.53 111.182  17
   1  -6 -20 1084.76 106.927  12
   1  -6 -19-41.3983 62.5044   8
   1  -6 -19-15.7349 80.0383  10
  -1   6  19 80.3600 77.4761  17
   1  -6 -19 22.8927 79.4569  19
  -1   6  18 677.342 110.257  17
   1  -6 -18 648.640 128.454  10
   1  -6 -18 659.340 144.291  19
   1  -6 -18 754.649 95.2709   8
   1  -6 -17 735.480 101.600   8
   1  -6 -17 864.659 148.607  10
  -1   6  17 654.090 130.058  17
   1  -6 -17 672.974 143.975  19
   1  -6 -16 9605.77 442.322  19
   1  -6 -16 9611.91 343.318   8
  -1   6  16 10402.7 422.564  17
   1  -6 -16 9938.69 432.893  10
   1  -6 -15 1894.44 194.457  10
   1  -6 -15 1992.35 212.676  19
   1  -6 -15 2054.91 209.095  18
   1  -6 -15 1904.71 154.427   8
   1  -6 -15 1913.55 155.709  15
   1  -6 -14 183.864 93.7301  18
   1  -6 -14 72.4212 88.8968  19
   1  -6 -14 171.799 113.764   3
   1  -6 -14 230.659 81.7149   8
   1  -6 -14 148.413 98.0945  10
   1  -6 -14 59.4905 71.2154  15
   1  -6 -13 49542.8 966.973   8
   1  -6 -13 53270.6 1615.51   3
  -1   6  13 51590.9 1774.32   6
   1  -6 -13 51551.5 1139.32  18
   1  -6 -13 51757.3 1105.80  10
   1  -6 -13 50389.2 961.132  15
   1  -6 -13 53076.7 1145.79  19
  -1   6  12 1555.99 306.577   6
   1  -6 -12 1825.06 183.328  18
   1  -6 -12 2025.64 290.180   3
   1  -6 -11 8479.07 599.432   3
  -1   6  11 9163.70 684.983   6
  -1   6  10 6688.34 569.377   6
   1  -6 -10 7276.56 530.779   3
  -1   6   9 21336.9 981.112   6
   1  -6  -9 21630.6 918.765   3
   1  -6  -8 5277.00 320.487   4
   1  -6  -8 5979.25 457.286   3
   1  -6  -7 14073.9 704.850   3
  -1   6   7 11823.1 692.041  22
   1  -6  -7 14425.0 506.672   4
  -1   6   7 11921.0 509.142   5
  -1   6   6 3978.01 312.191   5
  -1   6   6 3959.36 380.300  22
   1  -6  -6 4891.41 392.512   3
   1  -6  -6 5042.27 268.939   4
   1  -6  -5 3793.28 332.949   3
  -1   6   5 3126.35 319.408  22
   1  -6  -5 3762.04 208.796   4
   1  -6  -4 1230.91 102.279   4
  -1   6   4 1003.97 163.077   2
   1  -6  -4 1141.50 174.734   3
   1  -6  -4 1077.65 87.9701  21
  -1   6   4 962.908 170.794  22
   1  -6  -3 27832.1 844.080   3
   1  -6  -3 26973.6 589.979  21
   1  -6  -3 26253.2 497.178   4
  -1   6   3 25964.6 816.705   2
   1  -6  -2 163.315 75.5767   3
  -1   6   2 109.924 62.4368   2
   1  -6  -2 161.415 59.0618  21
  -1   6   1 21119.4 703.885   2
   1  -6  -1 20778.7 563.967  21
   1  -6  -1 21750.1 656.720   3
   1  -6   0 6443.45 316.333   3
  -1   6   0 6140.47 360.970   2
   1  -6   0 6622.56 308.770  21
   1  -6   1 10118.2 408.590  21
   1  -6   1 10195.2 383.900   3
  -1   6  -1 10061.9 458.939   2
   1  -6   2 33086.5 836.700  21
  -1   6  -2 34304.1 913.616   2
   1  -6   2 32866.3 739.361   3
  -1   6  -3 3632.55 126.695   4
  -1   6  -3 3998.99 291.314   2
   1  -6   3 4103.16 299.877   6
   1  -6   3 3914.55 272.305  21
   1  -6   3 4050.53 212.403   3
  -1   6  -4 2899.24 260.853   2
   1  -6   4 2844.19 173.834   3
  -1   6  -4 2967.12 142.387   4
   1  -6   4 2755.81 258.007   6
   1  -6   4 2982.53 244.514  21
   1  -6   5 51467.3 952.045   3
   1  -6   5 52558.8 1176.01  21
  -1   6  -5 51417.4 1250.73   2
  -1   6  -5 51002.7 1112.17   1
  -1   6  -5 52171.5 955.436   4
   1  -6   5 51909.6 1282.88   6
  -1   6  -6 17231.1 574.019   1
   1  -6   6 17665.3 701.828   6
   1  -6   6 18110.1 447.017   3
   1  -6   6 18509.2 636.281  21
  -1   6  -6 16988.7 674.773   2
  -1   6  -6 18521.1 525.735   4
  -1   6  -7 18151.0 598.775   1
   1  -6   7 18734.6 749.629   6
   1  -6   7 18828.3 652.108  21
  -1   6  -7 19249.1 588.301   4
  -1   6  -7 18283.2 729.257   2
   1  -6   8 15111.4 596.850  21
  -1   6  -8 14823.5 685.948   2
  -1   6  -8 14045.9 530.370   1
  -1   6  -8 15423.6 561.953   4
   1  -6   8 14056.8 678.504   6
   1  -6   9 24558.8 795.767  21
  -1   6  -9 25826.6 958.663   2
  -1   6  -9 26094.1 813.304   4
   1  -6   9 24626.5 956.273   6
  -1   6  -9 24873.7 771.318   1
   1  -6  10 526.907 137.115  21
   1  -6  10 572.655 173.069   6
  -1   6 -10 520.812 133.602   4
  -1   6 -10 376.678 102.016   1
  -1   6 -10 403.825 157.724   2
  -1   6 -11 764.471 203.877   2
  -1   6 -11 669.495 144.230   4
   1  -6  11 1122.97 247.613   6
   1  -6  11 734.097 145.743  21
   1  -6  12 1898.12 304.056   6
  -1   6 -12 1594.14 238.798   4
   1  -6  12 1814.65 220.336  21
  -1   6 -12 1974.43 325.545   2
   1  -6  13 1941.43 238.678  21
   1  -6  13 1990.28 329.970   6
  -1   6 -13 2306.95 308.345   4
   1  -6  14 19796.7 735.868  21
   1  -6  14 20742.8 1059.06   6
  -1   6 -14 22291.1 952.702   4
  -1   6 -15 3296.41 221.629  11
  -1   6 -15 3237.52 234.425  14
  -1   6 -15 3563.07 375.986   4
   1  -6  15 3342.17 430.752   6
  -1   6 -15 3306.61 247.779  19
  -1   6 -16 9597.56 382.041  11
  -1   6 -16 8187.68 401.504  19
  -1   6 -16 9289.98 634.269   4
  -1   6 -16 8981.59 392.131  14
   1  -6  16 8175.88 685.926   6
  -1   6 -17 197.870 103.741  14
  -1   6 -17-30.0049 101.056  19
  -1   6 -17 286.427 93.5775  11
  -1   6 -18 1283.52 174.638  19
  -1   6 -18 1457.61 155.562  11
  -1   6 -18 1439.45 175.867  14
  -1   6 -19 4198.91 231.542  11
  -1   6 -19 4118.13 280.770  19
  -1   6 -19 4205.43 274.501  14
  -1   6 -20 1110.67 157.240  14
  -1   6 -20 1006.98 154.122  19
  -1   6 -21 1319.94 167.312  19
   1  -6  21 1202.66 130.955  13
  -1   6 -21 1142.60 141.899  14
   1  -6  22 86.0425 64.8844  13
  -1   6 -22 132.638 77.0758  14
  -1   6 -22 64.7710 77.9607  19
   1  -6  23 1097.70 96.6930  13
  -1   6 -23 1249.50 128.238  19
  -1   6 -23 1244.31 116.716  14
   1  -6  24 2599.90 115.308  13
  -1   6 -24 2704.42 144.420  14
  -1   5  22 19.7166 35.7369  17
   1  -5 -22-3.41445 55.2541  19
   1  -5 -22 82.5797 47.3242  12
  -1   5  21-19.0179 48.9587  17
   1  -5 -21-23.1591 63.7155  19
   1  -5 -21-76.3274 62.1864  12
   1  -5 -21-17.1478 73.4871  10
   1  -5 -21-12.2848 42.2614   8
   1  -5 -20 467.996 111.543  10
   1  -5 -20 652.943 86.5651   8
   1  -5 -20 660.910 121.263  19
  -1   5  20 542.187 95.5146  17
   1  -5 -19 2936.31 235.112  19
  -1   5  19 2530.60 187.641  17
   1  -5 -19 2686.38 218.051  10
   1  -5 -19 2649.60 168.092   8
   1  -5 -18 1805.11 193.343  10
   1  -5 -18 1612.71 145.155   8
   1  -5 -18 1865.32 200.663  19
  -1   5  18 1634.80 161.956  17
  -1   5  17 1917.55 182.186  17
   1  -5 -17 1607.79 193.821  10
   1  -5 -17 1836.99 198.556  19
   1  -5 -17 1842.08 158.348   8
   1  -5 -16 93.5661 95.9644  10
   1  -5 -16 138.942 84.3530   8
  -1   5  16 203.941 95.7343  17
   1  -5 -16 109.657 107.481  19
   1  -5 -15 14317.5 411.165  15
   1  -5 -15 15354.6 537.793  10
   1  -5 -15 15688.5 560.915  18
   1  -5 -15 15257.2 551.913  19
   1  -5 -15 14432.7 454.375   8
   1  -5 -14 6470.90 262.734  15
   1  -5 -14 7080.13 362.205  18
   1  -5 -14 6534.67 284.939   8
   1  -5 -14 7165.41 349.567  10
   1  -5 -14 6801.76 351.597  19
  -1   5  14 7072.84 622.688   6
   1  -5 -14 7033.78 530.514   3
   1  -5 -13 6873.38 524.767   3
  -1   5  13 5902.57 556.692   6
   1  -5 -13 6510.71 334.764  19
   1  -5 -13 6695.14 479.697   4
   1  -5 -13 6848.16 337.919  18
  -1   5  12 11093.9 754.385   6
   1  -5 -12 11933.2 612.946   4
   1  -5 -12 11455.7 672.693   3
   1  -5 -11 1384.07 211.495   4
  -1   5  11 1196.34 243.997   6
   1  -5 -11 1552.08 264.546   3
   1  -5 -10 286.544 108.621   4
   1  -5 -10 369.894 143.488   3
  -1   5  10 105.937 112.115   6
  -1   5   9 10048.3 630.025   6
   1  -5  -9 9625.62 471.639   4
   1  -5  -9 10093.9 595.222   3
  -1   5   8 4841.14 438.929  22
   1  -5  -8 5321.27 416.674   3
   1  -5  -8 6067.90 347.802   4
   1  -5  -7 160.581 82.9501   4
   1  -5  -7 202.918 106.999   3
  -1   5   7 320.502 88.6967   5
  -1   5   7 302.196 168.950  22
   1  -5  -6 5765.25 401.857   3
   1  -5  -6 5824.35 291.966   4
  -1   5   6 5005.21 404.323  22
   1  -5  -5 39787.1 1104.55   3
   1  -5  -5 40401.3 842.907   4
  -1   5   4 547.039 135.229  22
   1  -5  -4 601.764 132.059   3
   1  -5  -4 548.478 55.6747  21
   1  -5  -3 43309.7 776.201  21
   1  -5  -3 44090.9 1070.00   3
   1  -5  -3 44987.3 770.089   4
  -1   5   2 73119.3 1425.43   2
   1  -5  -2 76837.0 1431.34   3
   1  -5  -2 74110.2 1198.40  21
   1  -5  -1 81337.2 1459.30   3
   1  -5  -1 78137.6 1330.57  21
  -1   5   1 78581.4 1504.61   2
   1  -5   0 1138.46 120.842  21
   1  -5   0 1008.63 116.742   3
   1  -5   1 5714.98 250.815   3
   1  -5   1 5545.50 270.787  21
  -1   5  -1 5542.09 304.368   2
   1  -5   2 991.352 101.156   3
   1  -5   2 967.945 119.687  21
  -1   5  -2 963.908 136.777   2
   1  -5   2 1052.81 142.698   6
  -1   5  -2 901.043 49.0610   4
  -1   5  -3 364.353 93.4855   2
  -1   5  -3 371.467 49.1634   4
   1  -5   3 543.077 110.612   6
   1  -5   3 451.557 93.1985  21
   1  -5   3 399.971 64.8501   3
  -1   5  -4 51669.9 899.570   4
   1  -5   4 50422.6 910.514   3
   1  -5   4 50977.6 1164.60   6
  -1   5  -4 50616.5 1045.58   1
  -1   5  -4 52608.5 1152.40   2
   1  -5   4 50508.5 1079.07  21
  -1   5  -5 12826.3 518.200   2
  -1   5  -5 12413.9 439.187   1
  -1   5  -5 12870.9 394.259   4
   1  -5   5 12637.4 348.302   3
   1  -5   5 12126.5 465.104  21
   1  -5   5 13106.0 533.600   6
   1  -5   6 81.0352 74.1060   6
  -1   5  -6 157.777 79.5410   2
   1  -5   6 32.2537 53.6021  21
  -1   5  -6 116.564 57.3164   1
  -1   5  -6 143.533 76.6642   4
   1  -5   7 36914.5 1055.95   6
  -1   5  -7 39506.5 943.904   4
  -1   5  -7 38850.6 1073.68   2
  -1   5  -7 36996.9 891.470   1
   1  -5   7 38714.8 932.228  21
   1  -5   8 13894.7 632.706   6
   1  -5   8 13751.2 518.711  21
  -1   5  -8 14428.0 562.815   4
  -1   5  -8 13685.5 519.533   1
  -1   5  -8 14177.2 638.530   2
  -1   5  -9 46450.2 1176.88   4
  -1   5  -9 44457.2 1105.97   1
   1  -5   9 45086.4 1074.80  21
   1  -5   9 43538.2 1269.95   6
  -1   5  -9 46863.7 1314.24   2
  -1   5 -10 7274.58 449.369   4
   1  -5  10 7032.90 497.054   6
   1  -5  10 7070.91 379.478  21
  -1   5 -10 7312.86 432.118   1
  -1   5 -10 7351.33 504.868   2
  -1   5 -11 27194.8 1065.68   2
  -1   5 -11 27139.7 937.189   1
   1  -5  11 26188.7 796.122  21
   1  -5  11 25512.8 1037.36   6
  -1   5 -11 27357.7 952.381   4
  -1   5 -12 18054.9 789.992   4
  -1   5 -12 17755.0 798.054   1
   1  -5  12 16517.7 858.905   6
   1  -5  12 16455.1 621.270  21
  -1   5 -13 2322.12 301.191   4
   1  -5  13 2550.11 241.166  21
   1  -5  13 2505.23 355.379   6
  -1   5 -14 8571.66 592.821   4
   1  -5  14 8343.77 650.537   6
  -1   5 -15 16059.6 551.816  19
  -1   5 -15 15508.2 482.143   8
  -1   5 -15 18152.3 891.101   4
  -1   5 -15 17179.4 535.674  14
   1  -5  15 16478.2 942.919   6
  -1   5 -16 6559.17 540.667   4
  -1   5 -16 6835.53 335.907  14
   1  -5  16 6265.17 605.040   6
  -1   5 -16 6475.84 303.730  11
  -1   5 -16 5876.77 335.946  19
  -1   5 -17 4183.91 240.206  11
  -1   5 -17 4323.17 289.047  19
  -1   5 -17 3967.85 271.168  14
  -1   5 -18 181.454 98.8328  19
  -1   5 -18 51.2209 91.6545  14
  -1   5 -19 4123.89 293.329  19
  -1   5 -19 4556.62 228.049  12
  -1   5 -19 4824.66 286.648  14
  -1   5 -20 1073.75 149.813  14
  -1   5 -20 887.612 143.992  19
  -1   5 -20 1127.74 115.101  12
  -1   5 -21 1569.47 163.346  14
  -1   5 -21 1879.24 190.746  19
  -1   5 -21 1695.62 129.571  12
   1  -5  22 2409.94 159.311  13
  -1   5 -22 2557.91 140.447  12
  -1   5 -22 2539.77 197.773  19
  -1   5 -22 2814.12 189.939  14
  -1   5 -23 16.0363 61.9933  14
   1  -5  23 126.120 55.0156  13
  -1   5 -23 69.3070 61.8959  19
  -1   5 -24 808.119 86.0937  14
  -1   5 -24 922.264 101.230  19
   1  -5  24 761.968 64.6574  13
   1  -4 -23 611.818 69.3815  12
   1  -4 -23 571.596 77.9976  19
   1  -4 -22 97.0099 58.6731  12
   1  -4 -22 56.2259 60.2505  19
  -1   4  22 92.5307 47.3404  17
   1  -4 -21 820.091 130.187  10
   1  -4 -21 949.487 112.823  12
   1  -4 -21 781.283 93.5264   8
   1  -4 -21 1010.03 136.509  19
  -1   4  21 875.500 102.358  17
   1  -4 -20 3024.39 232.164  19
   1  -4 -20 2874.72 182.179   8
  -1   4  20 3039.99 190.741  17
   1  -4 -20 3157.25 228.730  10
   1  -4 -19 629.336 125.090  19
   1  -4 -19 685.965 132.795  10
  -1   4  19 556.267 105.865  17
   1  -4 -19 714.170 110.840   8
   1  -4 -18 5582.35 268.918   8
   1  -4 -18 5761.21 329.578  10
   1  -4 -18 5749.35 336.155  19
  -1   4  18 5344.65 280.585  17
   1  -4 -17 3698.97 272.334  19
   1  -4 -17 4132.91 237.083   8
  -1   4  17 3844.71 248.200  17
   1  -4 -17 3688.00 269.429  10
   1  -4 -16 12357.2 499.987  19
   1  -4 -16 12989.4 499.043  10
  -1   4  16 12667.5 450.777  17
   1  -4 -16 12159.7 424.923   8
  -1   4  15 10370.8 396.140  17
   1  -4 -15 9647.04 425.496  19
   1  -4 -15 9413.33 309.181  15
  -1   4  15 9821.41 729.962   6
   1  -4 -15 9754.32 428.245  18
   1  -4 -15 9835.20 420.058  10
   1  -4 -15 9132.57 599.769   4
   1  -4 -15 9094.59 355.713   8
  -1   4  14 13435.5 850.781   6
   1  -4 -14 13528.3 714.403   3
   1  -4 -14 13698.0 502.765  19
   1  -4 -14 13658.5 432.186   8
   1  -4 -14 13322.4 490.149  18
   1  -4 -14 13098.9 709.724   4
   1  -4 -14 13823.3 486.886  10
   1  -4 -13 164.319 91.2382   4
   1  -4 -13 139.113 126.987   3
  -1   4  13 345.425 169.733   6
   1  -4 -12 1404.96 217.586   4
  -1   4  12 1154.80 223.590   6
   1  -4 -12 1634.26 259.212   3
   1  -4 -11 1229.21 218.596   3
  -1   4  11 1186.07 240.908   6
   1  -4 -11 1154.67 191.511   4
   1  -4 -10 1441.18 227.312   3
  -1   4  10 1482.59 246.429   6
   1  -4 -10 1227.88 186.881   4
   1  -4  -9 328.980 137.059   3
  -1   4   9 286.089 132.152   6
   1  -4  -9 578.593 130.334   4
   1  -4  -8 4934.00 380.935   3
  -1   4   8 4075.30 364.604   6
   1  -4  -8 5262.13 324.581   4
  -1   4   8 4425.17 420.160  22
   1  -4  -7 44297.7 1011.01   4
  -1   4   7 41408.1 857.831   5
  -1   4   7 42201.2 1305.62  22
   1  -4  -7 45878.4 1223.36   3
   1  -4  -6 11553.3 542.213   3
  -1   4   6 10420.0 568.062  22
   1  -4  -5 5030.53 339.866   3
  -1   4   5 4332.28 332.843  22
  -1   4   4 330.275 95.0705  22
   1  -4  -4 514.807 110.870   3
   1  -4  -4 378.483 34.8193  21
   1  -4  -3 703.843 62.2739  21
   1  -4  -3 895.518 134.723   3
   1  -4  -2 7274.12 230.081  21
   1  -4  -2 7751.38 333.593   3
   1  -4  -2 7902.77 196.799   4
  -1   4   1 17136.0 515.513   2
   1  -4  -1 18356.1 495.758   3
   1  -4  -1 17393.1 419.273  21
   1  -4   0 29390.6 630.577   3
   1  -4   0 28869.6 618.955  21
  -1   4   0 29335.7 701.709   2
   1  -4   1 120949. 1808.01   3
   1  -4   1 117437. 1870.40  21
  -1   4  -1 122686. 1959.41   2
  -1   4  -2 9611.51 218.512   4
  -1   4  -2 9753.27 375.035   2
   1  -4   2 10532.4 351.784  21
   1  -4   2 10004.9 291.492   3
  -1   4  -3 222984. 3276.61   2
   1  -4   3 212415. 3182.26  21
   1  -4   3 220639. 3044.01   3
  -1   4  -3 217422. 3013.93   4
  -1   4  -4 4695.67 238.758   1
   1  -4   4 4757.74 248.078  21
   1  -4   4 4591.07 273.414   6
  -1   4  -4 5099.65 285.508   2
   1  -4   4 4937.16 191.039   3
  -1   4  -4 4629.66 206.973   4
  -1   4  -5 11288.2 450.268   2
   1  -4   5 11101.1 457.394   6
  -1   4  -5 11535.6 390.343   4
  -1   4  -5 11115.5 389.485   1
   1  -4   5 10898.9 392.506  21
  -1   4  -6 34644.3 924.362   2
   1  -4   6 33856.3 793.928  21
  -1   4  -6 33739.5 787.945   1
  -1   4  -6 35177.0 824.262   4
   1  -4   6 33872.1 909.723   6
  -1   4  -7 884.227 148.146   2
   1  -4   7 1098.54 134.687  21
  -1   4  -7 882.728 119.473   1
  -1   4  -7 984.855 147.219   4
   1  -4   7 899.407 147.321   6
  -1   4  -8 30157.8 950.498   2
  -1   4  -8 31369.8 875.469   4
  -1   4  -8 29914.5 821.238   1
   1  -4   8 30154.2 941.001   6
   1  -4   8 29337.8 759.530  21
  -1   4  -9 6222.50 394.859   4
  -1   4  -9 6858.12 451.966   2
  -1   4  -9 5985.43 368.325   1
   1  -4   9 6313.82 325.459  21
   1  -4   9 5808.38 419.909   6
   1  -4  10 8710.28 539.013   6
  -1   4 -10 9286.26 558.923   2
  -1   4 -10 8566.19 488.375   1
   1  -4  10 8536.52 391.734  21
  -1   4 -10 10136.3 523.965   4
  -1   4 -11 2662.41 293.195   1
   1  -4  11 2214.75 292.460   6
  -1   4 -11 2296.84 268.915   4
   1  -4  11 2204.92 197.756  21
   1  -4  12 471.521 183.904   6
   1  -4  12 339.000 82.6386  21
  -1   4 -12 356.777 147.110   1
  -1   4 -12 337.276 133.590   4
  -1   4 -13 640.316 193.188   4
   1  -4  13 370.811 171.070   6
  -1   4 -13 434.169 176.461   1
  -1   4 -14-59.1244 140.833   4
   1  -4  14 170.551 136.306   6
  -1   4 -15 49630.6 1545.31   4
  -1   4 -15 48500.3 1067.45  19
  -1   4 -15 49107.9 1023.18  14
   1  -4  15 47163.2 1658.47   6
  -1   4 -16 10263.0 441.051  19
  -1   4 -16 10822.9 697.649   4
  -1   4 -16 9774.49 389.074   8
   1  -4  16 10930.9 762.602   6
  -1   4 -16 10357.1 408.103  14
  -1   4 -17 1663.00 178.526  14
  -1   4 -17 1500.64 157.530   8
  -1   4 -17 1640.11 188.078  19
  -1   4 -18 8762.55 418.414  19
  -1   4 -18 8676.30 388.640  14
  -1   4 -19 840.871 147.009  14
  -1   4 -19 901.151 154.972  19
  -1   4 -20 569.601 123.540  19
  -1   4 -20 754.252 108.197  12
  -1   4 -20 854.125 140.363  14
  -1   4 -21 246.077 91.1174  14
  -1   4 -21 115.504 60.4326  12
  -1   4 -21 136.715 82.8150  19
  -1   4 -22 2328.81 143.224  12
  -1   4 -22 2283.71 191.630  19
  -1   4 -22 2357.46 175.901  14
  -1   4 -23 279.087 83.9651  19
  -1   4 -23 233.805 51.6308  12
   1  -4  23 163.954 55.3357  13
  -1   4 -23 215.445 70.9751  14
  -1   4 -24 26.2584 42.0060  14
  -1   4 -24 57.0423 29.6614  12
  -1   4 -24-29.0860 51.9099  19
   1  -3 -23 764.204 84.3642  12
   1  -3 -23 693.179 94.5788  19
   1  -3 -22 48.5467 54.2270   8
   1  -3 -22-12.5336 72.3991  19
  -1   3  22 48.4377 50.4107  17
   1  -3 -22-57.4969 70.5690  12
   1  -3 -21 1017.98 118.927   8
  -1   3  21 1095.98 112.058  17
   1  -3 -21 1019.74 138.940  10
   1  -3 -21 1075.79 148.630  19
   1  -3 -20 6674.94 286.593   8
   1  -3 -20 6754.52 342.871  10
   1  -3 -20 6600.24 344.082  19
  -1   3  20 6397.80 276.788  17
   1  -3 -19 4004.38 279.061  19
   1  -3 -19 4167.38 278.299  10
   1  -3 -19 3890.34 229.642   8
  -1   3  19 3701.82 223.986  17
   1  -3 -18 1612.28 186.245  10
   1  -3 -18 1551.25 183.431  19
   1  -3 -18 1887.58 170.648   8
  -1   3  18 1413.04 147.118  17
  -1   3  17 1211.52 136.222  17
   1  -3 -17 989.793 152.597  19
   1  -3 -17 928.466 148.851  10
   1  -3 -17 1275.65 148.648   8
  -1   3  16 244.128 88.5189  17
   1  -3 -16 314.130 125.494  19
   1  -3 -16 102.464 80.9816   8
   1  -3 -16 22.6028 85.1523  10
  -1   3  16-35.2282 156.082   6
   1  -3 -16 50.6577 124.447   4
  -1   3  15 558.312 101.922  17
   1  -3 -15 785.105 113.569   8
  -1   3  15 723.670 223.411   6
   1  -3 -15 745.301 139.430  19
   1  -3 -15 668.498 118.815  10
   1  -3 -15 683.469 182.574   4
   1  -3 -14 1460.85 239.527   3
  -1   3  14 1506.39 281.276   6
   1  -3 -14 1709.32 256.894   4
   1  -3 -13 433.832 138.176   4
  -1   3  13 163.233 157.674   6
   1  -3 -13 291.059 139.233   3
   1  -3 -12 543.285 160.635   3
   1  -3 -12 531.501 166.350   4
  -1   3  12 529.775 177.833   6
   1  -3 -11 10190.2 542.375   4
  -1   3  11 10798.7 646.826   6
   1  -3 -11 10936.4 586.359   3
   1  -3 -10 7300.28 465.210   3
   1  -3 -10 6269.12 401.484   4
  -1   3  10 6231.55 476.415   6
  -1   3   9 16752.5 740.476   6
   1  -3  -9 17536.5 651.100   4
   1  -3  -9 16950.5 716.052   3
   1  -3  -8 6365.63 353.429   4
   1  -3  -8 6220.96 409.222   3
  -1   3   8 5757.35 407.988   6
  -1   3   8 5815.77 459.562  22
  -1   3   7 8378.60 241.461   5
  -1   3   7 8623.07 520.965  22
   1  -3  -7 9330.02 489.961   3
   1  -3  -6 30703.2 879.596   3
  -1   3   6 29185.8 945.039  22
   1  -3  -5 457.270 109.035   3
  -1   3   5 16.2599 91.7652  22
   1  -3  -4 61394.4 1239.18   3
  -1   3   4 59426.4 1254.28  22
   1  -3  -3 71931.6 1297.58   3
   1  -3  -3 68202.9 979.423  21
   1  -3  -2 749.432 55.5808   4
   1  -3  -2 634.387 89.5435   3
   1  -3  -2 612.933 54.3324  21
   1  -3  -1 72087.3 1123.74   3
  -1   3   1 68625.5 1161.55   2
   1  -3  -1 69593.2 1022.82  21
   1  -3   0 26158.6 516.174   3
  -1   3   0 24924.1 573.537   2
   1  -3   0 24360.9 500.646  21
  -1   3  -1 26442.0 584.461   2
   1  -3   1 25899.1 498.166   3
  -1   3  -1 25448.6 392.660   4
  -1   3  -2 35666.0 750.458   2
   1  -3   2 37159.2 644.139   3
   1  -3   2 36432.5 707.061  21
  -1   3  -3 35463.4 766.387   2
   1  -3   3 33981.6 705.481  21
  -1   3  -3 36432.6 717.814   1
   1  -3   3 35663.1 628.237   3
   1  -3   4 133040. 2064.51  21
  -1   3  -4 136693. 2081.39   1
  -1   3  -4 139668. 2183.20   2
   1  -3   5 12600.6 459.739   6
  -1   3  -5 11850.3 390.731   1
  -1   3  -5 12606.7 461.435   2
   1  -3   5 12227.7 382.218  21
  -1   3  -6 11111.5 407.380   1
   1  -3   6 11669.7 382.317  21
   1  -3   6 11167.5 468.119   6
  -1   3  -6 11417.9 470.348   2
   1  -3   7 3102.93 257.689   6
  -1   3  -7 3497.02 281.428   2
   1  -3   7 2800.03 186.195  21
  -1   3  -7 3214.19 232.858   1
  -1   3  -8 30713.2 944.920   2
   1  -3   8 30187.4 933.367   6
   1  -3   8 30048.6 723.434  21
  -1   3  -8 31711.5 872.383   1
  -1   3  -9 51717.2 1288.12   1
   1  -3   9 49826.8 1323.44   6
  -1   3  -9 52643.8 1361.78   2
   1  -3   9 50361.5 1041.88  21
   1  -3  10 15.2516 47.3175  21
  -1   3 -10 260.635 124.213   1
   1  -3  10 110.511 92.7137   6
  -1   3 -11 21202.1 820.658   4
   1  -3  11 19388.8 584.468  21
  -1   3 -11 20495.8 880.292   1
   1  -3  11 19422.8 852.405   6
  -1   3 -12 1786.66 251.215   4
   1  -3  12 1326.06 237.197   6
  -1   3 -12 1607.98 256.818   1
  -1   3 -13 4963.42 443.726   4
   1  -3  13 4138.65 430.828   6
  -1   3 -13 4662.69 471.397   1
   1  -3  14 16038.5 882.097   6
  -1   3 -14 18233.1 862.847   4
  -1   3 -14 16970.1 947.058   1
  -1   3 -15 3720.23 401.269   4
   1  -3  15 3891.39 441.898   6
  -1   3 -16 537.742 172.873   4
  -1   3 -16 243.006 98.4021  10
  -1   3 -16 379.783 109.707  14
   1  -3  16 135.651 118.758   6
  -1   3 -16 313.806 102.849   8
  -1   3 -16 414.113 106.374  19
  -1   3 -17 206.089 102.632  19
  -1   3 -17-22.1614 82.7576  14
  -1   3 -17 108.578 89.5456   8
  -1   3 -18-60.5640 101.324  19
  -1   3 -18 51.6736 82.4436  14
  -1   3 -18 43.9218 77.0942   8
  -1   3 -19 156.823 86.1300  19
  -1   3 -19 199.233 99.1463  14
  -1   3 -20 4770.25 306.495  19
  -1   3 -20 5038.31 278.319  14
  -1   3 -21 4750.25 293.274  19
  -1   3 -21 4800.40 258.519  14
  -1   3 -21 4663.11 230.757  12
  -1   3 -22 54.5843 58.9520  12
  -1   3 -22 116.371 82.6476  19
  -1   3 -22 85.6666 65.3194  14
  -1   3 -23 92.4635 64.2264  19
   1  -3  23 123.145 55.0827  13
  -1   3 -23 173.072 55.6085  12
  -1   3 -23 144.463 60.1096  14
  -1   3 -24 135.983 46.1879  14
  -1   3 -24 120.685 37.7527  12
  -1   3 -24 183.037 62.8248  19
   1  -2 -24 76.5914 46.7977  12
   1  -2 -24 16.4619 44.2489  19
   1  -2 -23 624.178 101.548  19
   1  -2 -23 590.062 84.7094  12
   1  -2 -22 622.309 112.056  19
   1  -2 -22 569.401 97.4159  12
   1  -2 -22 552.614 92.2793   8
   1  -2 -21 1160.07 158.530  19
  -1   2  21 1353.94 122.722  17
   1  -2 -21 1225.52 130.323   8
  -1   2  20 3448.64 200.505  17
   1  -2 -20 3573.25 217.435   8
   1  -2 -20 3281.51 251.693  10
   1  -2 -20 3378.55 257.704  19
  -1   2  19-70.2416 78.0005  17
   1  -2 -19 258.168 105.538  10
   1  -2 -19 4.39897 86.4580   8
   1  -2 -19 179.999 107.491  19
   1  -2 -18 4713.31 263.843   8
   1  -2 -18 4864.75 306.860  19
  -1   2  18 4388.54 241.783  17
   1  -2 -18 4509.08 295.103  10
  -1   2  17 1558.32 150.220  17
   1  -2 -17 1316.51 147.083   8
   1  -2 -17 1341.13 184.013  10
   1  -2 -17 1341.64 171.022  19
  -1   2  16 7686.60 314.925  17
  -1   2  16 7744.74 648.433   6
   1  -2 -16 7574.14 369.047  19
   1  -2 -16 7467.90 363.303  10
   1  -2 -16 7656.51 333.317   8
   1  -2 -16 7177.18 567.051   4
  -1   2  15 864.147 199.541   6
   1  -2 -15 948.242 133.346  19
   1  -2 -15 1193.76 132.845   8
   1  -2 -15 972.988 207.994   4
   1  -2 -15 885.886 132.447  10
  -1   2  14 169.690 130.105   6
   1  -2 -14 195.765 141.052   4
   1  -2 -13 5246.34 400.702   3
  -1   2  13 5279.41 484.703   6
   1  -2 -13 5467.59 437.793   4
  -1   2  12 2586.22 324.046   6
   1  -2 -12 2865.19 310.645   4
   1  -2 -12 2723.52 283.910   3
  -1   2  11 4957.31 423.564   6
   1  -2 -11 4534.67 363.926   4
   1  -2 -11 4880.32 369.312   3
  -1   2  10 2354.78 281.656   6
   1  -2 -10 2274.17 244.301   4
   1  -2 -10 2741.11 270.938   3
   1  -2  -9 33982.6 947.912   4
   1  -2  -9 33026.2 990.628   3
  -1   2   9 33857.4 1056.09   6
  -1   2   8 11176.3 615.017  22
  -1   2   8 10287.7 519.416   6
   1  -2  -8 10311.2 500.688   3
   1  -2  -8 10236.8 451.323   4
  -1   2   7 385.688 136.338  22
   1  -2  -7 323.574 111.376   1
   1  -2  -7 217.907 99.0538   3
  -1   2   7 320.523 96.1889   6
  -1   2   6 14180.3 611.007  22
   1  -2  -6 16593.2 592.769   3
  -1   2   6 15905.3 566.342   6
  -1   2   5 169597. 2910.37  22
   1  -2  -5 183851. 2838.95   3
   1  -2  -4 13390.8 441.939   3
  -1   2   4 13237.4 476.707  22
   1  -2  -3 482732. 6512.67   4
   1  -2  -3 506478. 6670.68   3
   1  -2  -2 76323.6 1100.93   4
   1  -2  -2 76167.5 1055.35  21
   1  -2  -2 74787.0 1211.13   3
   1  -2  -1 182.694 28.6743  21
   1  -2  -1 276.805 22.9692   4
   1  -2  -1 271.886 43.1128   3
   1  -2   0 150823. 2083.61  21
   1  -2   0 151565. 2087.95   3
  -1   2   0 149961. 2148.92   2
  -1   2  -1 2536.30 131.139   2
   1  -2   1 2345.37 114.526  21
   1  -2   1 2626.49 108.424   3
  -1   2  -2 1103.56 96.6789   2
   1  -2   2 1025.49 80.7920  21
   1  -2   2 1205.64 75.6855   3
  -1   2  -2 1084.44 86.4270   1
  -1   2  -3 10019.3 302.505   1
  -1   2  -3 10068.3 327.711   2
   1  -2   3 10248.2 290.593  21
  -1   2  -4 127564. 1974.15   1
  -1   2  -4 133078. 2062.98   2
   1  -2   4 129857. 1928.34  21
   1  -2   4 129878. 2049.70   6
   1  -2   5 1425.83 146.838   6
  -1   2  -5 1357.92 131.845   1
   1  -2   5 1199.22 104.674  21
  -1   2  -5 1328.72 145.000   2
  -1   2  -6 22170.2 628.984   1
   1  -2   6 22315.7 669.183   6
  -1   2  -6 22413.1 677.626   2
   1  -2   6 22126.3 526.170  21
  -1   2  -7 77555.1 1595.63   2
   1  -2   7 77021.8 1309.42  21
   1  -2   7 76264.2 1567.79   6
  -1   2  -7 77460.1 1535.08   1
   1  -2   8 1450.16 127.667  21
  -1   2  -8 1390.10 191.142   1
   1  -2   8 1479.43 192.355   6
  -1   2  -9 19230.2 765.175   1
   1  -2   9 19185.3 518.022  21
   1  -2   9 19075.9 749.281   6
   1  -2  10 28163.3 671.645  21
   1  -2  10 27730.1 971.767   6
  -1   2 -10 28983.1 1038.59   1
  -1   2 -11 550.388 187.990   1
   1  -2  11 406.655 143.882   6
   1  -2  12 158.297 109.458   6
  -1   2 -12 400.058 184.007   1
  -1   2 -12 329.362 150.802   4
  -1   2 -13 512.606 153.851   4
   1  -2  13 568.876 193.065   6
  -1   2 -13 588.958 226.847   1
  -1   2 -14 28375.9 1103.58   4
   1  -2  14 25883.3 1125.94   6
  -1   2 -14 26692.8 1213.39   1
   1  -2  15 281.155 145.131   6
  -1   2 -15 427.039 168.064   4
   1  -2  16 374.131 193.536   6
   1  -2  16 484.089 88.6743  17
  -1   2 -16 371.032 89.1125  14
  -1   2 -16 483.955 108.157   8
  -1   2 -16 335.078 103.149  10
  -1   2 -16 145.640 128.930   4
  -1   2 -16 395.849 107.897  19
  -1   2 -17 389.049 104.313  19
   1  -2  17 238.898 80.3250  17
  -1   2 -17 348.239 115.879   8
  -1   2 -17 211.082 98.0662  10
  -1   2 -17 275.205 96.7944  14
  -1   2 -18 2768.08 207.415   8
  -1   2 -18 2715.79 241.092  19
  -1   2 -18 2609.10 229.454  10
   1  -2  18 2875.77 188.327  17
  -1   2 -18 2621.68 216.745  14
  -1   2 -19 228.881 95.2545  14
  -1   2 -19 232.938 105.459   8
   1  -2  19 63.8251 67.3418  17
  -1   2 -19 165.363 93.3356  19
  -1   2 -20 1139.06 160.709  19
  -1   2 -20 1080.40 141.050  14
  -1   2 -21 1460.15 148.262  14
  -1   2 -21 1827.37 185.103  19
  -1   2 -22 716.496 104.408  14
  -1   2 -22 735.868 99.7547  12
  -1   2 -22 747.422 123.782  19
  -1   2 -23 157.010 59.1648  12
  -1   2 -23 157.978 76.0479  19
  -1   2 -23 83.8108 48.6715  14
  -1   2 -24 169.230 46.3354  12
  -1   2 -24 173.523 57.1754  19
  -1   2 -24 222.370 41.8180  14
   1  -1 -24 350.665 65.1003  12
   1  -1 -24 312.697 66.2913  19
   1  -1 -23 316.234 75.8730  12
   1  -1 -23 191.284 71.5903  19
   1  -1 -22 1442.77 161.283  19
   1  -1 -22 1700.50 144.281   8
   1  -1 -22 1639.11 147.411  12
   1  -1 -21 301.589 102.464  19
   1  -1 -21 527.288 106.622   8
   1  -1 -20 370.094 115.600  19
   1  -1 -20 262.096 97.6711   8
   1  -1 -20 347.965 121.444  10
  -1   1  20 417.213 81.5426  17
   1  -1 -19 5220.36 316.925  19
   1  -1 -19 4892.71 310.870  10
  -1   1  19 4869.27 243.827  17
   1  -1 -19 5061.38 277.946   8
   1  -1 -18 28.8557 85.8527  10
   1  -1 -18 11.4707 93.6624  19
   1  -1 -18-3.04940 89.1144   8
  -1   1  18 70.2063 72.9862  17
  -1   1  17 3150.81 197.844  17
   1  -1 -17 3187.63 247.388  19
   1  -1 -17 2963.34 197.348  14
   1  -1 -17 3420.99 230.206   8
   1  -1 -17 3200.42 247.426  10
   1  -1 -17 3135.79 376.185   4
  -1   1  16 9294.80 332.962  17
   1  -1 -16 9758.31 378.569   8
   1  -1 -16 9971.29 418.816  19
  -1   1  16 10288.3 742.074   6
   1  -1 -16 9873.13 419.417  10
   1  -1 -16 10443.8 681.164   4
   1  -1 -15 5295.98 467.217   4
  -1   1  15 4957.90 495.384   6
   1  -1 -14 4781.87 434.866   4
  -1   1  14 4883.20 473.608   6
   1  -1 -13 9877.15 590.973   4
  -1   1  13 9285.91 632.065   6
   1  -1 -13 9913.90 503.969   3
   1  -1 -12 11296.7 597.947   4
   1  -1 -12 11271.5 536.375   3
  -1   1  12 10783.9 647.564   6
   1  -1 -11 1040.10 213.199   1
   1  -1 -11 449.050 109.915   3
  -1   1  11 751.919 173.114   6
   1  -1 -11 1019.00 188.773   4
   1  -1 -10 806.744 156.740   3
   1  -1 -10 646.372 148.450   4
  -1   1  10 676.684 164.610   6
   1  -1 -10 784.692 192.279   1
   1  -1  -9 187382. 3127.84   4
   1  -1  -9 190572. 3134.44   3
   1  -1  -9 190516. 3348.38   1
  -1   1   9 190868. 3296.55   6
   1  -1  -8 7977.98 413.471   3
  -1   1   8 8100.63 444.901   6
   1  -1  -8 7287.23 449.339   1
   1  -1  -8 7936.69 388.765   4
  -1   1   7 4415.64 305.772   6
   1  -1  -7 4637.83 298.801   3
  -1   1   7 5536.27 388.342  22
   1  -1  -7 4480.50 270.207   4
   1  -1  -7 5297.06 348.893   1
   1  -1  -6 121122. 2003.87   4
  -1   1   6 131014. 2143.04   6
   1  -1  -6 126000. 2177.21   1
   1  -1  -6 131951. 2120.08   3
  -1   1   6 123512. 2248.04  22
  -1   1   6 119294. 1636.19  21
   1  -1  -5 71703.9 1283.54   3
   1  -1  -5 68031.5 1213.43   4
   1  -1  -5 72404.1 1346.74   1
  -1   1   5 67242.2 940.325  21
   1  -1  -4 18593.4 448.413   4
  -1   1   4 17557.4 325.879  21
   1  -1  -4 19788.1 484.697   3
   1  -1  -4 20409.8 533.996   1
   1  -1  -3 38240.5 694.831   3
   1  -1  -3 38141.5 679.335   4
  -1   1   3 39781.8 587.100  21
   1  -1  -2 60739.2 919.349   3
   1  -1  -2 59952.3 858.095   5
   1  -1  -2 62107.9 905.822   4
   1  -1  -1 703.504 47.7322   3
   1  -1  -1 668.042 39.6111   4
  -1   1   0 284318. 3801.24   2
   1  -1   0 290769. 3795.96   3
  -1   1  -1 26383.5 470.659   1
  -1   1  -1 24649.3 453.470   2
   1  -1   1 25634.9 448.616   6
   1  -1   1 25186.6 433.078   3
   1  -1   1 25793.1 442.222  21
   1  -1   2 31248.2 520.631   5
  -1   1  -2 31479.6 594.602   2
  -1   1  -2 32218.7 591.507   1
   1  -1   2 33229.2 556.461  21
   1  -1   2 32915.4 592.549   6
   1  -1   3 752.378 54.4117   5
   1  -1   3 691.379 65.2584  21
  -1   1  -3 667.752 75.3176   1
  -1   1  -3 607.121 79.3990   2
   1  -1   3 756.044 84.3910   6
   1  -1   4 1407.26 134.367   6
   1  -1   4 1684.33 105.381  21
  -1   1  -4 1380.59 128.921   1
   1  -1   4 1667.10 82.4837   5
  -1   1  -4 1326.77 126.853   2
  -1   1  -5 143237. 2266.24   1
   1  -1   5 143175. 2267.17   6
   1  -1   5 143351. 2033.20  21
  -1   1  -5 143149. 2276.30   2
   1  -1   5 135229. 1923.88   5
   1  -1   6 1629.18 170.046   6
  -1   1  -6 1389.45 168.820   1
   1  -1   6 1474.62 107.613  21
   1  -1   7 2692.91 148.871  21
  -1   1  -7 2571.20 248.570   1
   1  -1   7 2544.60 234.534   6
  -1   1  -8 1039.68 184.234   1
   1  -1   8 1052.92 164.653   6
   1  -1   9 17208.1 702.206   6
  -1   1  -9 17241.1 779.306   1
   1  -1  10 45103.6 1289.25   6
  -1   1 -10 46822.1 1450.84   1
   1  -1  11 42.3916 102.494   6
  -1   1 -11-35.5569 148.657   3
  -1   1 -11 167.002 156.310   1
  -1   1 -12 14222.3 802.207   3
   1  -1  12 14043.0 740.101   6
  -1   1 -12 15371.6 877.535   1
  -1   1 -13 433.077 182.825   1
   1  -1  13 658.631 177.563   6
  -1   1 -13 908.405 200.202   4
   1  -1  14 29472.9 1195.40   6
  -1   1 -14 29216.4 1302.28   1
  -1   1 -14 31407.0 1179.41   4
   1  -1  15 4766.70 488.435   6
  -1   1 -15 5638.96 303.035  10
  -1   1 -15 5653.53 499.508   4
  -1   1 -15 5094.07 279.886   8
  -1   1 -15 5795.46 563.803   1
  -1   1 -15 5762.97 305.933  19
  -1   1 -16 2390.30 193.348   8
   1  -1  16 2395.90 351.641   6
  -1   1 -16 2365.67 203.305  10
  -1   1 -16 2435.16 186.339  14
   1  -1  16 2420.70 172.828  17
  -1   1 -16 2415.92 348.927   4
  -1   1 -16 2390.61 215.873  19
  -1   1 -17 22862.1 689.539  19
  -1   1 -17 22066.7 669.645  10
   1  -1  17 21095.2 570.513  17
  -1   1 -17 22558.3 623.390  14
  -1   1 -17 22121.9 640.699   8
  -1   1 -18 1999.20 205.149  10
   1  -1  18 1953.44 167.398  17
  -1   1 -18 1852.93 181.417   8
  -1   1 -18 2163.16 210.537  19
  -1   1 -18 2040.60 190.036  14
  -1   1 -19 46.4681 85.7372   8
   1  -1  19-34.6903 72.3168  17
  -1   1 -19 160.912 90.5574  14
  -1   1 -19 143.323 103.588  19
  -1   1 -19 62.6888 92.2921  10
   1  -1  20 6444.49 276.009  17
  -1   1 -20 6545.29 352.393  19
  -1   1 -20 6716.91 307.372  14
  -1   1 -21 1602.01 149.519  14
   1  -1  21 1693.62 129.697  17
  -1   1 -21 1463.56 162.785  19
  -1   1 -22 125.260 69.3630  12
  -1   1 -22 0.63312 69.1368  19
  -1   1 -22-42.7588 59.7732  14
  -1   1 -23 40.5258 56.3738  12
  -1   1 -23 21.4253 61.8699  19
  -1   1 -23 32.2378 43.7470  14
  -1   1 -24 190.446 44.8321  12
  -1   1 -24 267.193 59.2257  19
   1   0 -25 13.2741 35.1551  12
   1   0 -25 78.3421 42.2635  19
   1   0 -24 1490.42 109.654  12
   1   0 -24 1328.91 124.447  19
   1   0 -23 1642.82 158.316  19
   1   0 -23 1354.46 123.866  12
   1   0 -22 9.02379 73.2473   8
   1   0 -22 24.3797 84.9932  19
   1   0 -22 81.4018 75.2937  12
   1   0 -21 848.858 148.772  19
   1   0 -21 869.530 111.035  14
   1   0 -21 1116.31 144.144   8
   1   0 -21 1002.34 138.986  12
   1   0 -20 360.817 126.257  19
   1   0 -20 364.769 90.4947  14
   1   0 -20 332.581 103.145   8
   1   0 -19 12038.8 490.833  19
   1   0 -19 11480.6 430.132   8
   1   0 -19 11952.5 490.724  10
   1   0 -19 12078.5 415.915  14
   1   0 -18 5884.06 291.456   8
   1   0 -18 5550.10 331.896  10
   1   0 -18 5393.33 276.276  14
   1   0 -18 5791.30 327.085  19
   1   0 -17 1955.10 167.714   8
   1   0 -17 1638.56 184.352  10
  -1   0  17 1612.97 306.068   6
   1   0 -17 1482.30 257.707   4
   1   0 -17 1696.91 160.180  14
   1   0 -17 1648.89 176.171  19
  -1   0  16 8542.60 670.567   6
   1   0 -16 8765.75 346.458   8
   1   0 -16 8704.66 634.541   4
   1   0 -16 9288.47 397.138  19
   1   0 -16 9111.30 397.071  10
   1   0 -15 4555.73 450.176   4
  -1   0  15 4612.64 477.494   6
  -1   0  14 13117.5 777.589   6
   1   0 -14 13739.2 730.270   4
  -1   0  13 3442.73 382.917   6
   1   0 -13 3557.87 351.692   4
  -1   0  12 11461.5 662.289   6
   1   0 -12 11394.7 600.646   4
   1   0 -12 11223.6 485.461   3
   1   0 -12 11818.7 647.740   1
   1   0 -11 11997.8 587.507   4
  -1   0  11 12708.8 660.613   6
   1   0 -11 11978.7 629.107   1
   1   0 -11 12427.5 507.735   3
   1   0 -10 40345.5 1200.77   1
  -1   0  10 41756.1 1211.94   6
   1   0 -10 41482.4 1110.46   4
   1   0 -10 40751.0 1000.83   3
   1   0  -9 2823.69 251.916   4
   1   0  -9 2517.15 213.715   3
  -1   0   9 2694.99 271.594   6
  -1   0   9 2863.38 131.624  21
   1   0  -9 2824.02 280.857   1
  -1   0   8 7787.86 424.753   6
   1   0  -8 7201.56 348.121   3
  -1   0   8 7755.93 227.131  21
   1   0  -8 7673.69 387.133   4
   1   0  -8 7345.44 429.738   1
  -1   0   7 431.886 103.489   6
   1   0  -7 591.748 115.877   3
   1   0  -7 501.012 120.785   1
   1   0  -6 427787. 6088.77   1
   1   0  -6 429435. 5907.34   3
   1   0  -6 424800. 5943.20   4
  -1   0   6 434174. 5668.56  21
  -1   0   5 7589.13 229.810  21
   1   0  -5 8092.38 277.526   3
   1   0  -4 81752.0 1181.51   3
   1   0  -4 83279.8 1308.58   1
  -1   0   4 79272.7 1284.77  21
  -1   0   3 455.190 66.7279  21
   1   0  -3 573.083 43.6226   3
   1   0  -3 486.433 56.3453   1
   1   0  -3 520.716 33.1958   5
   1   0  -2 140031. 1923.05   3
  -1   0   2 145478. 2006.32  21
  -1   0   2 146355. 2022.76   6
   1   0  -1 116807. 1652.12   3
  -1   0   1 124434. 1661.97   6
  -1   0   0 66190.7 951.673   1
   1   0   1 47683.9 729.835   5
  -1   0  -1 48351.3 792.508   1
   1   0   1 49731.8 735.203   6
  -1   0  -2 6886.29 245.084   1
   1   0   2 6774.00 215.663   6
   1   0   2 6668.97 172.676   5
  -1   0  -3 46807.2 923.409   1
   1   0   3 46236.0 859.499   6
   1   0   3 46387.1 721.895   5
   1   0   4 222.256 64.3064   6
   1   0   4 323.999 41.2615   5
   1   0   5 52451.4 1074.69   6
  -1   0  -5 50508.4 1156.79   1
   1   0   5 50576.3 779.560   5
   1   0   6 711.778 51.8395   5
   1   0   6 697.269 117.954   6
  -1   0  -7 2841.17 283.808   1
   1   0   7 2261.42 84.3452   5
   1   0   7 2714.65 238.246   6
  -1   0  -8 40032.7 1249.15   1
   1   0   8 42506.6 1121.22   6
  -1   0  -9 2247.55 308.202   1
   1   0   9 2219.30 257.683   6
   1   0  10 13563.4 653.782   6
  -1   0 -10 13777.4 776.345   1
  -1   0 -11 10166.6 697.431   1
  -1   0 -11 8941.97 658.647   3
   1   0  11 9344.54 569.571   6
   1   0  12 927.678 196.323   6
  -1   0 -12 792.548 210.891   1
  -1   0 -12 892.071 227.895   3
  -1   0 -13 15120.2 908.516   1
   1   0  13 14199.0 791.138   6
  -1   0 -13 15993.5 799.708   4
  -1   0 -13 16574.7 835.529   3
  -1   0 -14 1841.24 322.938   1
  -1   0 -14 2370.02 327.668   4
   1   0  14 1959.16 291.818   6
  -1   0 -15 269.693 78.8402  14
  -1   0 -15 299.103 93.6328  19
   1   0  15 334.161 83.0490  17
   1   0  15 231.060 137.620   6
  -1   0 -15 252.867 159.664   4
  -1   0 -15 187.745 91.7370   8
  -1   0 -15-137.464 161.850   1
  -1   0 -15 119.092 73.6774  10
  -1   0 -16 10413.4 698.276   4
  -1   0 -16 9626.55 395.711   8
   1   0  16 9133.83 676.554   6
  -1   0 -16 9614.99 415.700  10
  -1   0 -16 9799.75 421.662  19
  -1   0 -16 9422.19 363.318  14
   1   0  16 8729.83 346.472  17
  -1   0 -17 302.205 113.859   8
  -1   0 -17 262.677 81.5905  14
   1   0  17 302.832 83.0497  17
  -1   0 -17 304.591 108.727  19
  -1   0 -17 468.647 121.391  10
  -1   0 -18 2749.93 208.802  14
  -1   0 -18 2703.91 217.229   8
  -1   0 -18 2830.71 238.572  10
  -1   0 -18 2881.14 242.517  19
   1   0  18 2895.71 198.582  17
  -1   0 -19 16514.5 521.937   8
  -1   0 -19 16898.1 574.267  10
  -1   0 -19 16535.5 506.929  14
  -1   0 -19 16336.9 581.777  19
   1   0  19 16439.1 485.759  17
  -1   0 -20 6.19300 69.1676  14
   1   0  20 21.7876 58.3367  17
  -1   0 -20 111.975 90.3398  19
  -1   0 -20 271.915 115.022  10
   1   0  21 470.763 81.8186  17
  -1   0 -21 324.603 100.364  19
  -1   0 -21 527.987 94.5037  14
  -1   0 -22 976.368 124.040  19
  -1   0 -22 895.097 104.226  12
   1   0  22 885.890 86.4699  17
  -1   0 -22 698.982 83.2718  14
  -1   0 -23 107.311 54.7771  12
  -1   0 -23 44.6923 54.6234  19
  -1   0 -24 192.255 47.1863  19
  -1   0 -24 288.763 45.8057  12
   1   1 -25 1164.29 100.719  19
   1   1 -25 1072.08 77.1128  12
   1   1 -24 15.4149 58.9014  19
   1   1 -24 93.8047 55.8662  12
   1   1 -23 700.108 96.7398  12
   1   1 -23 861.691 122.358  19
   1   1 -23 677.790 86.4864  14
   1   1 -22 1210.84 134.181  12
   1   1 -22 1156.70 119.912  14
   1   1 -22 1305.07 137.686   8
   1   1 -22 1537.40 170.369  19
   1   1 -21 341.838 95.0045  14
   1   1 -21 472.297 111.189   8
   1   1 -21 472.879 107.551  12
   1   1 -21 378.099 117.544  19
   1   1 -20 1261.58 161.959  19
   1   1 -20 1292.43 146.988  14
   1   1 -19 202.324 96.7700   8
   1   1 -19 112.513 85.3599  19
   1   1 -19 201.921 80.5252  14
   1   1 -18 138.917 100.695  10
   1   1 -18 113.631 92.1131  19
   1   1 -18 154.040 82.0103  14
   1   1 -18 229.524 91.8365   8
   1   1 -17 3792.91 258.158  19
  -1  -1  17 3724.47 450.979   6
   1   1 -17 3514.65 259.375  10
   1   1 -17 3581.60 230.310  14
   1   1 -17 3810.27 424.964   4
   1   1 -17 4110.15 235.288   8
   1   1 -16 2829.85 360.760   4
   1   1 -16 2891.74 192.557   8
   1   1 -16 2541.21 213.176  10
   1   1 -16 2655.52 213.354  19
  -1  -1  16 2976.30 401.664   6
   1   1 -15 669.049 212.078   4
  -1  -1  15 1067.51 248.954   6
   1   1 -14 183.213 106.344   4
  -1  -1  14-12.2937 125.046   6
   1   1 -13 6971.91 491.328   1
   1   1 -13 6825.02 491.979   4
  -1  -1  13 6589.56 520.393   6
  -1  -1  12 6979.00 507.735   6
   1   1 -12 6810.12 472.696   1
   1   1 -12 6253.58 446.211   4
   1   1 -11 25757.3 894.348   4
  -1  -1  11 27232.9 981.746   6
   1   1 -11 25939.5 938.284   1
   1   1 -10 7318.14 324.659   3
  -1  -1  10 7579.70 273.298  21
  -1  -1  10 7344.79 469.625   6
   1   1 -10 7033.29 416.987   4
   1   1 -10 6667.40 433.695   1
   1   1  -9 279.914 109.910   1
  -1  -1   9 233.144 53.6591  21
  -1  -1   9 189.254 85.3839   6
   1   1  -9 201.682 100.629   4
   1   1  -9 237.950 72.3412   3
  -1  -1   8 4225.45 309.229   6
  -1  -1   8 4230.18 193.699  21
   1   1  -8 4212.53 299.273   1
   1   1  -8 3833.74 213.432   3
   1   1  -8 4376.00 287.399   4
   1   1  -7 12069.9 448.428   4
   1   1  -7 12750.1 476.122   1
   1   1  -7 12032.7 353.224   3
  -1  -1   7 12640.3 344.500  21
  -1  -1   7 12824.9 505.236   6
   1   1  -6 174345. 2640.26   4
   1   1  -6 165915. 2310.95   5
  -1  -1   6 183437. 2519.77  21
  -1  -1   6 182626. 2757.24   6
   1   1  -6 168459. 2433.57   3
   1   1  -6 175717. 2647.39   1
   1   1  -5 1218.70 70.7762   3
  -1  -1   5 1124.74 112.341  21
   1   1  -5 1309.83 110.629   1
  -1  -1   5 1352.56 134.438   6
   1   1  -5 1271.76 75.9986   5
  -1  -1   4 428472. 5520.94   6
   1   1  -4 428029. 5365.16   1
  -1  -1   4 412648. 5630.13  21
   1   1  -4 423557. 5359.29   5
   1   1  -4 408356. 5509.12   2
  -1  -1   3 59958.3 1221.16  21
   1   1  -3 60263.0 895.716   1
   1   1  -3 68362.8 1028.69   5
  -1  -1   3 68229.4 1052.54   6
   1   1  -3 65217.8 1045.83   2
  -1  -1   2 34252.9 573.362   6
   1   1  -2 32059.4 561.728   2
   1   1  -2 34985.4 628.760   5
  -1  -1   2 32300.5 734.126  21
  -1  -1   1 315.752 35.0545   1
  -1  -1   1 312.380 52.3076  21
   1   1  -1 363.486 31.7368   2
  -1  -1   1 436.229 35.8147   6
  -1  -1   0 25377.8 523.136   1
  -1  -1   0 26146.0 484.504  21
   1   1   1 3774.43 149.766   5
  -1  -1  -1 3565.34 191.753   1
  -1  -1  -2 80784.9 1454.17   1
   1   1   2 82044.8 1228.31   5
   1   1   3 1393.16 119.966   6
   1   1   3 1294.15 84.2348   5
  -1  -1  -3 1383.88 161.282   1
   1   1   4 27219.5 662.658   6
   1   1   4 26557.6 499.264   5
  -1  -1  -4 26615.5 805.466   1
  -1  -1  -5 232.502 104.780   1
   1   1   5 306.884 40.9497   5
   1   1   5 363.904 83.4484   6
   1   1   6 9762.76 248.867   5
  -1  -1  -6 9831.65 544.729   1
   1   1   6 10144.5 443.728   6
   1   1   7 7958.64 419.125   6
  -1  -1  -7 7693.10 511.152   1
   1   1   7 7508.60 198.236   5
   1   1   8 21428.5 768.211   6
  -1  -1  -8 20336.1 908.210   1
  -1  -1  -9 540.183 166.045   1
  -1  -1  -9 233.205 182.932   3
   1   1   9 283.031 117.502   6
   1   1  10 2278.70 272.452   6
  -1  -1 -10 2396.84 361.986   3
  -1  -1 -10 2140.19 308.437   1
   1   1  11 6832.04 499.999   6
  -1  -1 -11 7107.75 591.483   1
  -1  -1 -11 7660.40 609.387   3
  -1  -1 -12 6001.69 552.903   1
   1   1  12 5467.49 465.263   6
  -1  -1 -12 5232.72 491.376   3
   1   1  13 24.0132 127.628   6
  -1  -1 -13 308.964 154.586   4
  -1  -1 -13 281.592 161.246   3
  -1  -1 -14 22186.3 959.365   3
  -1  -1 -14 21885.4 982.529   4
  -1  -1 -14 22705.1 1141.55   1
   1   1  14 19872.6 974.360   6
   1   1  15 571.801 182.885   6
  -1  -1 -15 621.009 124.029  10
  -1  -1 -15 669.346 108.552  14
  -1  -1 -15 751.039 204.011   4
  -1  -1 -15 520.120 125.166  19
  -1  -1 -15 677.552 110.204   8
   1   1  15 613.106 103.240  17
   1   1  16 770.387 179.800   6
  -1  -1 -16 760.993 129.618  19
  -1  -1 -16 931.708 130.216   8
   1   1  16 629.274 105.601  17
  -1  -1 -16 665.689 121.114  14
  -1  -1 -16 768.169 141.897  10
  -1  -1 -17 2321.12 215.585  10
   1   1  17 2072.67 179.076  17
  -1  -1 -17 2422.26 224.552  19
  -1  -1 -17 2473.87 193.674   8
  -1  -1 -17 2193.75 186.788  14
  -1  -1 -18 302.324 86.0983  14
  -1  -1 -18 37.8119 92.1370  10
  -1  -1 -18 71.8788 94.0916  19
   1   1  18 233.635 82.7068  17
  -1  -1 -18 124.896 82.3333   8
   1   1  19 1302.38 138.841  17
  -1  -1 -19 1003.16 133.792   8
  -1  -1 -19 1250.67 166.009  19
  -1  -1 -19 1240.49 168.401  10
  -1  -1 -19 1186.16 127.954  14
  -1  -1 -20 130.513 68.1022  14
   1   1  20 193.907 78.4664  17
  -1  -1 -20 236.166 102.708  10
  -1  -1 -20 218.763 95.5534  19
   1   1  21 2007.91 144.774  17
  -1  -1 -21 2328.23 191.432  19
  -1  -1 -21 1876.61 134.315  14
  -1  -1 -22 375.838 84.4376  19
   1   1  22 464.259 68.9285  17
  -1  -1 -22 459.454 83.5381  12
  -1  -1 -23 256.185 57.9104  19
  -1  -1 -23 446.631 66.6522  12
   1   2 -25 1415.43 88.9655  12
  -1  -2  25 1408.97 90.1356  13
   1   2 -25 1447.56 113.308  19
   1   2 -24 2117.12 124.064  14
   1   2 -24 2416.84 172.597  19
   1   2 -24 2436.81 137.807  12
   1   2 -23 173.017 63.0062  12
   1   2 -23 142.211 59.6418  14
   1   2 -23 60.6235 69.1833  19
   1   2 -22 5441.82 263.513  14
   1   2 -22 5848.10 313.128  19
   1   2 -22 5746.60 261.960  12
   1   2 -21 742.547 133.819  19
   1   2 -21 700.900 124.506   8
   1   2 -21 669.010 114.212  12
   1   2 -21 682.318 116.276  14
   1   2 -20 1555.55 191.288  19
   1   2 -20 1608.34 169.439  14
   1   2 -20 1692.27 163.099  12
   1   2 -20 1594.18 153.046   8
   1   2 -19 950.473 134.708   8
   1   2 -19 941.176 141.176  14
   1   2 -19 779.886 142.513  19
   1   2 -18 177.284 89.2797  14
   1   2 -18 302.194 109.370  19
   1   2 -18 237.291 94.9836   8
   1   2 -17 6512.57 340.216  19
   1   2 -17 6052.63 306.438  14
  -1  -2  17 6445.68 594.302   6
   1   2 -17 6536.61 576.871   4
   1   2 -17 6449.17 300.864   8
   1   2 -16 6197.54 333.009  10
  -1  -2  16 6100.49 561.605   6
   1   2 -16 6057.57 277.328   8
   1   2 -16 6062.37 315.849  19
   1   2 -16 6475.72 551.732   4
   1   2 -15 643.676 161.457   4
  -1  -2  15 733.413 230.818   6
  -1  -2  14 112.200 102.974   6
   1   2 -14 137.909 114.904   4
  -1  -2  13 9140.81 619.523   6
   1   2 -13 9770.48 582.645   4
   1   2 -12 21373.5 856.916   4
   1   2 -12 21953.0 845.548   1
  -1  -2  12 23774.8 959.470   6
  -1  -2  11 2734.50 186.377  21
  -1  -2  11 2982.08 316.996   6
   1   2 -11 2836.58 291.789   1
   1   2 -11 3037.01 297.637   4
  -1  -2  10 387.444 128.145   6
   1   2 -10 391.667 123.615   1
   1   2 -10 429.442 119.727   4
  -1  -2  10 449.576 89.9895  21
  -1  -2   9 8282.18 469.001   6
   1   2  -9 7767.64 411.797   4
   1   2  -9 8092.02 415.082   1
  -1  -2   9 7972.63 319.457  21
   1   2  -9 7430.17 242.779   3
  -1  -2   8 947.457 107.194  21
   1   2  -8 896.425 72.0353   3
   1   2  -8 1030.06 138.375   1
  -1  -2   8 1147.43 163.470   6
   1   2  -8 1029.05 76.1649   5
   1   2  -8 865.294 136.231   4
  -1  -2   7 10416.5 451.537   6
   1   2  -7 10275.1 407.524   4
   1   2  -7 10684.0 304.473   5
   1   2  -7 10728.2 457.098   2
   1   2  -7 10800.5 381.687   1
  -1  -2   7 10603.9 365.253  21
   1   2  -6 64263.4 1203.48   4
  -1  -2   6 67417.8 1214.28  21
   1   2  -6 65246.8 1289.59   2
  -1  -2   6 64563.0 1280.68   6
   1   2  -6 66177.0 1111.08   1
  -1  -2   5 890.135 129.584  21
   1   2  -5 707.184 110.500   2
   1   2  -5 841.876 97.6404   4
   1   2  -5 700.407 100.944   5
   1   2  -5 780.864 69.3481   1
  -1  -2   5 731.140 103.281   6
   1   2  -4 1018.96 60.2611   1
  -1  -2   4 1017.43 108.712   6
   1   2  -4 993.341 103.912   2
   1   2  -4 1076.22 99.2259   4
  -1  -2   3 196518. 2765.48   6
   1   2  -3 196552. 2708.60   4
   1   2  -3 193026. 2747.77   2
   1   2  -2 24118.3 460.962   4
  -1  -2   2 24709.9 495.356   6
  -1  -2   2 22638.9 481.469   3
   1   2  -2 24351.1 480.212   2
  -1  -2   2 23015.0 708.495  21
   1   2  -1 28494.5 528.667   2
  -1  -2   1 30161.1 548.232   6
   1   2  -1 29260.9 521.155   4
   1   2   0 22225.9 442.340   2
  -1  -2   0 22070.7 515.064   1
  -1  -2   0 22114.0 596.388  21
   1   2   0 22133.4 402.217  22
   1   2   1 388.871 61.0755  22
  -1  -2  -1 302.542 68.1965  21
   1   2   1 202.358 60.6658   5
  -1  -2  -1 288.009 80.8766   1
  -1  -2  -2 71273.2 1196.91  21
   1   2   2 72305.9 1235.11   5
   1   2   3 200090. 2843.50   5
  -1  -2  -3 201492. 2801.84  21
  -1  -2  -4 101558. 1501.55  21
   1   2   4 98986.8 1539.76   5
  -1  -2  -5 146661. 2035.52  21
   1   2   5 136131. 2066.75   5
   1   2   5 144661. 2375.99   6
  -1  -2  -5 138642. 2684.58   1
   1   2   6 1345.23 167.831   6
  -1  -2  -6 1415.00 90.9828  21
   1   2   6 1337.24 99.0404   5
  -1  -2  -6 1356.25 226.947   1
  -1  -2  -7 8101.20 544.838   1
   1   2   7 7694.31 428.956   6
   1   2   7 8129.90 244.123   5
  -1  -2  -8 14506.1 853.455   3
   1   2   8 16925.1 689.206   6
  -1  -2  -8 16768.5 827.735   1
  -1  -2  -9 2696.85 356.485   1
   1   2   9 2265.63 267.457   6
  -1  -2  -9 1937.98 320.867   3
  -1  -2 -10 883.107 265.117   3
   1   2  10 689.763 170.449   6
  -1  -2 -10 1141.95 240.860   1
  -1  -2 -11 901.823 253.198   3
  -1  -2 -11 732.727 210.520   1
   1   2  11 578.802 153.896   6
   1   2  12 573.267 178.013   6
  -1  -2 -12 747.469 251.646   1
  -1  -2 -12 331.011 176.716   3
  -1  -2 -13 8376.30 601.875   3
  -1  -2 -13 8099.80 568.248   4
   1   2  13 7720.73 585.106   6
   1   2  14 4074.49 231.921  17
  -1  -2 -14 3939.95 236.971   8
  -1  -2 -14 4241.48 436.704   3
  -1  -2 -14 4256.02 264.105  19
  -1  -2 -14 4160.42 418.869   4
  -1  -2 -14 4242.67 259.225  10
   1   2  14 3937.53 429.213   6
  -1  -2 -15 2766.56 221.998  10
   1   2  15 2952.35 392.383   6
  -1  -2 -15 2981.56 230.456  19
  -1  -2 -15 2614.17 195.064   8
   1   2  15 2614.09 192.008  17
  -1  -2 -15 2864.51 356.879   4
  -1  -2 -15 2715.37 187.600  14
  -1  -2 -16 25891.2 736.116  10
  -1  -2 -16 26063.0 642.456  14
   1   2  16 25027.3 658.029  17
  -1  -2 -16 25237.7 667.600   8
  -1  -2 -16 24814.1 731.339  19
  -1  -2 -17 4231.60 284.131  19
   1   2  17 3621.24 243.011  17
  -1  -2 -17 3688.82 270.898  10
  -1  -2 -17 3854.29 225.261  14
  -1  -2 -17 3606.16 227.950   8
  -1  -2 -18 16.5030 80.6284   8
  -1  -2 -18 148.318 88.1034  19
  -1  -2 -18 89.3887 91.1595  10
   1   2  18 38.4846 70.5447  17
  -1  -2 -18 101.420 79.6439  14
  -1  -2 -19 789.979 146.580  19
   1   2  19 746.593 123.961  17
  -1  -2 -19 867.165 115.632   8
  -1  -2 -19 944.446 150.041  10
  -1  -2 -19 780.254 103.893  14
  -1  -2 -20 781.699 130.863  19
  -1  -2 -20 725.798 131.367  10
   1   2  20 756.629 103.471  17
   1   2  21 120.296 59.2393  17
  -1  -2 -21 254.040 90.1916  19
  -1  -2 -22 420.278 82.9111  19
  -1  -2 -22 541.396 81.3336  12
   1   2  22 493.829 68.5822  17
  -1  -2 -23 121.052 45.6407  12
  -1  -2 -23 121.513 46.4759  19
  -1  -3  25-29.1194 40.3971  13
   1   3 -25 13.3080 31.8693  12
   1   3 -25-44.1977 49.2183  19
   1   3 -25-45.8592 32.5857  14
   1   3 -24 1259.49 104.072  14
   1   3 -24 1547.69 137.705  19
   1   3 -24 1470.42 106.222  12
   1   3 -23 1771.43 148.852  14
   1   3 -23 1959.31 173.449  19
   1   3 -23 1752.42 135.399  12
   1   3 -22 257.268 77.5639  12
   1   3 -22 289.597 82.0795  14
   1   3 -22 452.240 114.396  19
   1   3 -21 1122.63 155.786  19
   1   3 -21 1087.00 135.062   8
   1   3 -21 960.554 125.518  12
   1   3 -21 947.709 138.504  14
   1   3 -20 1403.43 145.613  12
   1   3 -20 1281.57 144.267   8
   1   3 -20 1289.82 167.518  19
   1   3 -20 1162.49 145.909  14
   1   3 -19 3965.29 236.914  12
   1   3 -19 3995.85 237.815   8
   1   3 -19 3980.61 262.832  14
   1   3 -19 3842.12 277.968  19
   1   3 -18 13935.9 499.955  14
   1   3 -18 14699.2 535.220  19
   1   3 -18 13146.7 453.293   8
   1   3 -17 3969.41 226.792   8
  -1  -3  17 4640.36 511.229   6
   1   3 -17 4284.98 277.221  19
   1   3 -17 4231.33 450.621   4
   1   3 -17 3737.98 247.670  14
   1   3 -16 5979.18 277.368   8
   1   3 -16 6567.56 544.717   4
   1   3 -16 6904.23 334.990  19
  -1  -3  16 7184.62 617.753   6
   1   3 -16 6457.07 312.996  14
   1   3 -15 650.792 201.917   4
  -1  -3  15 1126.14 277.766   6
  -1  -3  14 6157.28 532.708   6
   1   3 -14 5617.81 478.553   4
  -1  -3  13 9156.64 624.148   6
   1   3 -13 10029.7 595.853   4
  -1  -3  12 13178.6 482.000  21
   1   3 -12 14105.5 674.408   4
  -1  -3  12 13743.9 726.277   6
   1   3 -11 13388.2 627.036   4
  -1  -3  11 12886.9 664.224   6
  -1  -3  11 13273.2 478.814  21
  -1  -3  10 36680.5 1115.00   6
  -1  -3  10 36257.5 865.824  21
   1   3 -10 35380.4 963.392   1
   1   3 -10 36091.8 1027.22   4
   1   3  -9 73165.5 1249.11   5
  -1  -3   9 75881.8 1410.18  21
  -1  -3   9 75092.8 1665.82   6
   1   3  -9 72836.2 1553.81   4
   1   3  -9 74909.8 1460.54   1
   1   3  -8 26549.8 663.385   5
  -1  -3   8 27207.6 845.317   6
  -1  -3   8 28792.3 731.724  21
   1   3  -8 27402.3 775.109   4
   1   3  -8 28152.6 688.917   1
   1   3  -8 28833.0 866.583   2
   1   3  -7 498.522 102.543   4
  -1  -3   7 481.617 104.333   6
  -1  -3   7 443.568 95.7751  21
   1   3  -7 426.284 106.525   2
   1   3  -7 451.626 70.7661   1
   1   3  -7 457.169 91.2147   5
   1   3  -6 6936.19 229.388   1
   1   3  -6 6905.71 304.255   4
   1   3  -6 6673.49 346.599   2
  -1  -3   6 6464.26 335.992   6
  -1  -3   6 7707.87 359.590  21
   1   3  -5 22461.0 631.138   2
   1   3  -5 23165.9 450.786   1
  -1  -3   5 22533.5 626.798   6
   1   3  -5 23444.1 565.955   4
   1   3  -4 624657. 7445.59   1
  -1  -3   4 600167. 7698.72   6
   1   3  -4 596784. 7570.34   4
  -1  -3   4 610787. 7976.50  21
   1   3  -4 598398. 7687.33   2
  -1  -3   3 4450.60 218.781   6
  -1  -3   3 4773.43 142.195   3
   1   3  -3 4779.22 221.001   2
  -1  -3   3 4433.74 307.685  21
   1   3  -3 4624.35 184.945   4
   1   3  -2 82051.3 1270.01   4
  -1  -3   2 80156.1 1684.95  21
   1   3  -2 82423.3 1347.84   2
  -1  -3   2 86048.6 1325.81   3
  -1  -3   2 85252.8 1375.94   6
  -1  -3   1 1928.57 173.958   3
   1   3  -1 1977.83 132.606   2
   1   3  -1 2110.72 111.578   4
  -1  -3   0 48306.3 1186.34  21
   1   3   0 50950.1 917.410   2
   1   3   1 28815.2 758.039   5
  -1  -3  -1 26878.2 802.057  21
   1   3   1 29177.5 615.015  22
   1   3   2 8847.71 350.456  22
   1   3   2 8643.95 370.435   5
  -1  -3  -2 8388.21 399.318   1
  -1  -3  -3 323.805 96.6648  21
   1   3   3 284.191 96.7411  22
  -1  -3  -3 467.570 116.394   1
   1   3   3 366.976 84.6770   5
  -1  -3  -3 173.415 113.052   3
  -1  -3  -4 2606.42 205.038  21
  -1  -3  -4 1804.71 285.876   3
   1   3   4 2389.58 170.346   5
  -1  -3  -4 2083.38 244.173   1
  -1  -3  -5 6146.96 512.816   3
  -1  -3  -5 6100.07 262.089  21
  -1  -3  -5 7642.38 485.379   1
   1   3   5 7525.96 291.259   5
  -1  -3  -6 375.996 178.763   3
   1   3   6 356.135 69.1010   5
   1   3   6 287.122 92.6343   6
  -1  -3  -6 549.497 184.888   1
   1   3   7 5970.28 395.322   6
  -1  -3  -7 5689.17 461.844   1
   1   3   7 6106.23 239.175   5
  -1  -3  -7 5694.37 518.238   3
  -1  -3  -8 1757.75 325.220   3
  -1  -3  -8 2245.22 308.794   1
   1   3   8 1899.21 235.071   6
  -1  -3  -9 2328.90 342.528   1
   1   3   9 1937.60 260.827   6
  -1  -3  -9 2139.90 334.650   3
  -1  -3 -10 3377.46 414.677   1
   1   3  10 3464.27 362.623   6
  -1  -3 -10 3854.53 433.103   3
  -1  -3 -11 441.375 199.671   3
   1   3  11 36.2319 103.869   6
  -1  -3 -12 1123.11 271.493   3
   1   3  12 1156.06 225.774   6
   1   3  13 255.952 147.165   6
  -1  -3 -13 263.539 177.646   3
  -1  -3 -13 388.209 143.055   4
  -1  -3 -14 6744.90 519.266   4
  -1  -3 -14 6620.83 342.878  19
  -1  -3 -14 7000.41 549.504   3
   1   3  14 6833.16 314.154  17
  -1  -3 -14 6569.14 336.440  18
   1   3  14 6645.74 564.392   6
  -1  -3 -14 5837.92 284.719   8
  -1  -3 -14 6473.54 336.272  10
   1   3  15 32901.0 787.410  17
  -1  -3 -15 33409.7 858.518  19
  -1  -3 -15 33288.8 856.502  10
  -1  -3 -15 30899.7 747.384   8
   1   3  15 29787.8 1258.36   6
  -1  -3 -15 34871.7 1254.29   4
  -1  -3 -16 932.930 161.907  10
  -1  -3 -16 824.403 116.066   8
  -1  -3 -16 898.061 152.062  19
   1   3  16 791.104 126.185  17
  -1  -3 -17 4224.45 233.887   8
  -1  -3 -17 4200.80 285.963  10
   1   3  17 4234.76 254.745  17
  -1  -3 -17 4021.13 280.624  19
  -1  -3 -18 10.9913 90.0221  19
   1   3  18 93.9641 78.5612  17
  -1  -3 -18 172.030 107.908  10
  -1  -3 -18-66.2467 73.6234   8
  -1  -3 -19 288.136 79.1854   8
   1   3  19 215.668 84.5228  17
  -1  -3 -19 300.650 102.957  19
  -1  -3 -19 251.079 108.859  10
   1   3  20 618.450 94.5599  17
  -1  -3 -20 447.207 113.081  10
  -1  -3 -20 759.369 124.037  19
   1   3  21 964.768 99.5194  17
  -1  -3 -21 955.363 122.864  10
  -1  -3 -21 858.138 113.699  19
  -1  -3 -22 871.205 86.3620  12
   1   3  22 711.866 74.4119  17
  -1  -3 -22 829.727 95.5760  19
   1   4 -25 2281.96 138.068  19
  -1  -4  25 2372.25 121.626  13
   1   4 -24 218.625 49.5670  12
   1   4 -24 182.274 61.4458  19
   1   4 -24 216.014 61.4035  14
   1   4 -23 120.784 77.1786  19
   1   4 -23 149.914 67.5773  14
   1   4 -23 140.471 54.5012  12
   1   4 -22 2037.66 175.177  14
   1   4 -22 2111.26 148.125  12
   1   4 -22 1965.23 186.935  19
   1   4 -21 14260.3 522.411  19
   1   4 -21 13156.8 413.516  12
   1   4 -21 14070.6 475.537  14
   1   4 -20 8533.42 334.138   8
   1   4 -20 8358.76 400.210  19
   1   4 -20 8528.75 379.389  14
   1   4 -20 8354.27 330.677  12
   1   4 -19 10608.9 377.684  12
   1   4 -19 10168.5 426.460  14
   1   4 -19 9703.18 373.652   8
   1   4 -19 10746.7 457.948  19
   1   4 -18 407.033 114.596  14
   1   4 -18 559.811 124.271  19
   1   4 -18 554.455 105.080  12
   1   4 -18 706.623 116.537   8
   1   4 -17 2901.68 366.260   4
   1   4 -17 2547.73 180.127   8
   1   4 -17 2679.10 223.416  19
  -1  -4  17 2749.34 399.585   6
   1   4 -17 2487.37 211.559  14
   1   4 -17 2804.18 189.988  12
   1   4 -16 7383.13 346.648  14
  -1  -4  16 7679.09 640.628   6
   1   4 -16 7003.15 292.669   8
   1   4 -16 7434.41 597.394   4
   1   4 -16 7109.04 344.564  19
   1   4 -15 14243.9 785.009   4
  -1  -4  15 14012.8 855.446   6
   1   4 -14 532.735 189.967   4
  -1  -4  14 316.461 169.309   6
   1   4 -13 8886.17 566.369   4
  -1  -4  13 8569.28 609.026   6
  -1  -4  13 8797.37 425.166  21
   1   4 -12 9943.90 573.007   4
  -1  -4  12 10755.4 471.877  21
  -1  -4  12 10389.6 637.238   6
  -1  -4  11 7447.41 384.599  21
   1   4 -11 7538.79 464.068   4
  -1  -4  11 7490.49 518.898   6
   1   4 -10 6598.57 456.835   2
   1   4 -10 7122.33 427.380   4
  -1  -4  10 7198.43 375.491  21
  -1  -4  10 6792.93 459.980   6
  -1  -4   9 43755.3 1038.07  21
   1   4  -9 41086.6 975.441   5
   1   4  -9 42798.6 1196.08   2
   1   4  -9 43567.9 1094.21   4
  -1  -4   9 42727.0 1186.08   6
   1   4  -9 41868.8 924.111   1
  -1  -4   8 22772.7 774.970   6
   1   4  -8 23561.2 799.431   2
   1   4  -8 23720.6 571.241   1
   1   4  -8 23252.4 708.939   4
  -1  -4   8 24837.6 723.984  21
   1   4  -8 21466.6 702.528   5
   1   4  -7 13921.0 377.232   1
  -1  -4   7 13599.4 547.271   6
   1   4  -7 14548.1 565.902   2
   1   4  -7 14233.9 490.667   4
  -1  -4   7 14748.0 540.726  21
   1   4  -6 10576.7 299.248   1
   1   4  -6 10593.5 385.447   4
  -1  -4   6 10786.4 451.548   6
  -1  -4   6 11325.4 475.797  21
   1   4  -6 10495.6 451.096   2
  -1  -4   5 47269.7 1001.48   6
   1   4  -5 47007.2 863.009   4
   1   4  -5 49264.0 772.879   1
   1   4  -5 47420.1 980.494   2
  -1  -4   4 67774.7 1000.93   3
   1   4  -4 67423.6 1278.09   2
   1   4  -4 65807.6 1141.58   4
  -1  -4   4 67026.0 1297.07   6
  -1  -4   3 6137.68 291.771   6
   1   4  -3 5815.56 274.923   2
  -1  -4   3 6078.48 369.717  21
   1   4  -3 5888.93 221.266   4
  -1  -4   3 6015.88 202.074   3
   1   4  -2 185922. 2641.70   4
  -1  -4   2 182110. 3106.87  21
   1   4  -2 191767. 2812.01   2
  -1  -4   2 189073. 2728.57   3
   1   4  -1 127212. 2018.38   2
  -1  -4   1 131489. 2092.91   3
   1   4   0 110748. 1627.63  22
  -1  -4   0 109127. 1953.64   3
  -1  -4   0 104789. 2037.47  21
   1   4   0 101863. 1742.59   2
   1   4   1 1082.69 114.536  22
  -1  -4  -1 1335.48 211.665   3
  -1  -4  -1 1226.03 181.405  21
   1   4   1 1206.38 128.332   2
   1   4   1 1248.49 176.159   5
  -1  -4  -2 1612.31 231.199   3
  -1  -4  -2 1390.58 176.907  21
   1   4   2 1537.02 159.639  22
   1   4   2 1541.88 186.930   5
   1   4   3 5677.38 327.350  22
  -1  -4  -3 5114.19 432.554   3
  -1  -4  -3 4591.19 276.650  21
   1   4   3 5054.04 309.289   5
   1   4   4 16178.0 542.116   5
  -1  -4  -4 16585.7 487.483  21
  -1  -4  -4 16365.4 815.063   3
   1   4   5 2330.00 185.200   5
  -1  -4  -5 1898.35 308.807   3
   1   4   6 7558.30 322.032   5
  -1  -4  -6 7946.55 590.636   3
   1   4   7 45148.6 1259.57   6
  -1  -4  -7 47505.0 1542.17   3
   1   4   7 45518.0 926.141   5
   1   4   8 2382.42 282.212   6
  -1  -4  -8 3198.06 394.694   3
   1   4   9 5737.78 455.174   6
  -1  -4  -9 6499.15 546.878   3
   1   4  10 1850.00 273.299   6
  -1  -4 -10 1946.01 308.044   3
  -1  -4 -11 9617.37 681.381   3
   1   4  11 8743.31 609.797   6
   1   4  12 8639.74 628.917   6
  -1  -4 -12 8692.33 559.115   4
  -1  -4 -12 8730.02 640.714   3
  -1  -4 -13 7204.83 355.162  10
  -1  -4 -13 6804.41 341.893  18
  -1  -4 -13 6570.50 553.144   3
  -1  -4 -13 6630.98 499.717   4
   1   4  13 6341.87 551.493   6
  -1  -4 -13 6743.21 340.910  19
   1   4  13 6540.63 316.093  17
  -1  -4 -14 21123.4 931.587   4
  -1  -4 -14 20702.0 646.990  18
   1   4  14 21449.8 1042.31   6
  -1  -4 -14 21389.7 654.875  10
  -1  -4 -14 21377.4 655.125  19
  -1  -4 -14 22763.8 1015.07   3
  -1  -4 -14 20396.7 546.161   8
   1   4  14 21816.3 617.960  17
  -1  -4 -15 6111.47 337.556  10
   1   4  15 5841.63 305.102  17
  -1  -4 -15 5786.07 330.355  19
  -1  -4 -15 6027.20 337.655  18
  -1  -4 -15 5580.24 264.555   8
  -1  -4 -16 1888.69 198.184  10
  -1  -4 -16 1916.12 151.551   8
  -1  -4 -16 2093.68 206.453  19
   1   4  16 1871.24 179.934  17
   1   4  17 1866.59 171.422  17
  -1  -4 -17 1958.05 201.571  10
  -1  -4 -17 2108.99 156.066   8
  -1  -4 -17 1987.16 198.776  19
  -1  -4 -18 1625.70 184.075  19
   1   4  18 1595.38 160.594  17
  -1  -4 -18 1552.21 130.933   8
  -1  -4 -18 1552.93 179.898  10
  -1  -4 -19 3972.58 247.039  19
   1   4  19 3736.39 220.994  17
  -1  -4 -19 3830.16 248.843  10
  -1  -4 -20 458.787 91.2375  19
   1   4  20 357.630 84.7857  17
  -1  -4 -20 382.776 95.2680  10
  -1  -4 -21 23.6096 59.6184  10
  -1  -4 -21 6.24735 49.5523  19
   1   4  21 107.088 54.9701  17
  -1  -4 -22 317.761 50.7558  12
  -1  -4 -22 332.135 59.0056  19
   1   4  22 356.719 47.5036  17
  -1  -5  25 1918.26 110.460  13
   1   5 -25 1766.68 105.661  14
   1   5 -24 1545.30 134.179  19
   1   5 -24 1280.20 115.576  14
  -1  -5  24 1732.28 128.576  13
   1   5 -23 140.967 71.1450  19
   1   5 -23 85.6755 45.6168  12
   1   5 -23-37.9487 67.5330  14
   1   5 -22 89.8351 79.3333  14
   1   5 -22 213.499 69.5802  12
   1   5 -22 209.116 89.1702  19
   1   5 -21-30.9541 85.5769  14
   1   5 -21-133.799 93.0962  19
   1   5 -21-45.3929 66.2895  12
   1   5 -20 509.856 99.3796  12
   1   5 -20 421.351 106.387  19
   1   5 -20 417.984 111.081  14
   1   5 -19-29.2537 71.5308  12
   1   5 -19 135.166 107.411  19
   1   5 -19 110.090 88.7350  14
   1   5 -18 2224.66 166.767  12
   1   5 -18 2367.86 217.555  19
   1   5 -18 1908.86 159.087   8
   1   5 -18 2164.76 208.545  14
   1   5 -17 22.4480 73.7174  11
   1   5 -17 18.1949 72.1439   8
   1   5 -17-26.5875 121.435   4
   1   5 -17 118.811 61.8239  12
  -1  -5  17-49.4018 174.929   6
   1   5 -17 67.9690 81.2214  14
   1   5 -17 106.481 87.6042  19
   1   5 -16-47.4162 72.3250  14
   1   5 -16 62.5696 68.3410   8
   1   5 -16 224.029 105.343  19
   1   5 -16 21.8514 75.3025  11
  -1  -5  16 9.29957 144.387   6
   1   5 -16 206.059 135.941   4
  -1  -5  15 6045.87 574.516   6
   1   5 -15 7129.69 546.229   4
   1   5 -14 2562.49 330.204   4
  -1  -5  14 2638.74 259.292  21
  -1  -5  14 2510.43 357.624   6
  -1  -5  13 13596.8 789.489   6
  -1  -5  13 14535.1 599.771  21
   1   5 -13 14308.5 731.747   4
  -1  -5  12 17437.6 658.816  21
  -1  -5  12 15891.9 819.310   6
   1   5 -12 17150.5 761.901   4
   1   5 -11 91.3612 89.0815   4
  -1  -5  11 207.484 91.7283  21
  -1  -5  11-32.1628 104.263   6
   1   5 -11 125.777 109.020   2
   1   5 -10 17557.2 772.918   2
   1   5 -10 17084.8 679.455   4
   1   5 -10 16995.4 614.218   5
  -1  -5  10 17650.0 651.910  21
  -1  -5  10 16629.8 752.828   6
   1   5  -9 354.531 114.378   5
  -1  -5   9 107.498 76.3113   6
   1   5  -9 342.467 116.424   4
   1   5  -9 253.562 112.828   2
  -1  -5   9 436.514 119.318  21
  -1  -5   8 26781.0 881.455   6
   1   5  -8 27316.8 885.902   2
   1   5  -8 27335.0 770.162   4
  -1  -5   8 28892.2 839.566  21
   1   5  -7 86803.0 1587.89   4
   1   5  -7 85273.4 1403.70   1
  -1  -5   7 85505.4 1771.64   6
   1   5  -7 91142.0 1791.17   2
   1   5  -6 9946.90 314.615   1
   1   5  -6 9483.61 454.576   2
   1   5  -6 9386.59 362.236   4
  -1  -5   6 10337.8 480.590  21
  -1  -5   6 9507.66 456.504   6
  -1  -5   5 62686.6 1340.80   6
   1   5  -5 62106.1 1317.24   2
   1   5  -5 61365.7 1136.94   4
  -1  -5   5 63311.2 953.989   3
   1   5  -4 1671.19 171.978   2
   1   5  -4 1596.50 126.019   4
  -1  -5   4 1752.18 106.127   3
  -1  -5   4 1766.71 182.593   6
  -1  -5   3 3177.27 272.630  21
  -1  -5   3 2885.55 160.608   3
   1   5  -3 2856.64 215.335   2
  -1  -5   3 2991.66 225.581   6
   1   5  -3 2834.63 155.386   4
   1   5  -2 8442.94 267.889   4
   1   5  -2 8553.51 372.081   2
  -1  -5   2 8459.08 323.547   3
  -1  -5   2 8949.33 463.008  21
  -1  -5   1 5938.24 308.565   3
  -1  -5   1 6002.25 370.507  21
   1   5  -1 5680.50 299.949   2
   1   5   0 1050.05 102.288  22
  -1  -5   0 1166.95 173.328  21
  -1  -5   0 1316.24 168.493   3
   1   5   0 939.590 182.090   5
   1   5   0 1206.70 143.558   2
   1   5   1 7590.77 355.323   2
   1   5   1 7189.42 438.396   5
   1   5   1 7846.88 328.272  22
  -1  -5  -1 7955.79 439.618   3
  -1  -5  -1 7588.29 390.748  21
   1   5   2 5391.85 302.699  22
  -1  -5  -2 5744.49 314.259  21
   1   5   2 5535.07 376.824   5
  -1  -5  -2 5931.74 411.079   3
   1   5   2 5348.67 307.419   2
   1   5   3 48703.3 1154.30  22
   1   5   3 48720.7 1208.61   5
  -1  -5  -3 51303.8 1429.29   3
  -1  -5  -3 52200.4 1050.64  21
  -1  -5  -4 557.761 82.6222  21
  -1  -5  -4 577.920 193.042   3
   1   5   4 483.888 106.704   5
   1   5   5 10833.5 461.682   5
  -1  -5  -5 12061.5 695.005   3
  -1  -5  -6 1231.37 246.120   3
   1   5   6 996.147 141.110   5
  -1  -5  -7 4157.74 421.984   3
   1   5   7 4128.97 369.754   6
   1   5   8 5631.80 450.253   6
  -1  -5  -8 7143.65 565.141   3
  -1  -5  -9 2303.85 339.555   3
   1   5   9 1942.31 290.810   6
  -1  -5 -10 2445.97 353.691   3
   1   5  10 2221.98 313.719   6
   1   5  11 19539.7 948.839   6
  -1  -5 -11 20137.1 838.097   4
  -1  -5 -11 21648.3 1022.15   3
  -1  -5 -12 341.677 115.397  18
  -1  -5 -12 288.741 71.3602  15
   1   5  12 300.777 148.851   6
  -1  -5 -12 331.501 111.305  10
  -1  -5 -12 251.941 157.080   3
  -1  -5 -12 367.182 102.902  19
  -1  -5 -13 15185.2 535.298  10
  -1  -5 -13 14613.6 838.855   3
  -1  -5 -13 14959.6 538.853  18
   1   5  13 13669.7 809.141   6
  -1  -5 -13 14352.6 521.538  19
   1   5  13 14809.7 504.524  17
  -1  -5 -14 32495.1 859.749  19
  -1  -5 -14 34195.4 875.412  10
   1   5  14 33663.0 823.355  17
  -1  -5 -14 32408.6 866.912  18
  -1  -5 -15 14256.1 535.759  18
  -1  -5 -15 14521.4 538.471  10
   1   5  15 14111.5 495.263  17
  -1  -5 -15 14038.2 528.397  19
  -1  -5 -16 539.001 127.946  10
  -1  -5 -16 599.913 90.3927   8
  -1  -5 -16 528.841 120.273  19
   1   5  16 515.102 115.466  17
  -1  -5 -17-152.671 91.7525  19
   1   5  17 115.022 80.6824  17
  -1  -5 -17 29.8677 54.3888   8
  -1  -5 -17 179.873 118.219  10
   1   5  18 80.0453 73.3021  17
  -1  -5 -18 19.1722 50.2639   8
  -1  -5 -18-43.4370 84.4501  10
  -1  -5 -18 161.455 93.5506  19
   1   5  19-27.1249 67.4280  17
  -1  -5 -19 93.5392 78.1422  10
  -1  -5 -19 231.688 83.3221  19
   1   5  20 1009.53 104.302  17
  -1  -5 -20 1062.83 113.320  19
  -1  -5 -20 951.856 114.731  10
  -1  -5 -21 226.458 58.4232  19
   1   5  21 187.042 47.3753  17
  -1  -5 -21 170.350 47.4186  12
   1   6 -25 916.777 79.4135  14
  -1  -6  25 890.855 73.9939  13
  -1  -6  24 707.045 88.5461  13
   1   6 -24 736.399 89.6153  14
   1   6 -23 489.712 94.9612  14
   1   6 -23 542.337 101.968  19
  -1  -6  23 458.240 91.2955  13
   1   6 -22 6820.20 316.673  14
   1   6 -22 7189.96 335.814  19
   1   6 -21 5412.64 302.917  19
   1   6 -21 4770.04 282.882  14
   1   6 -20 5.07309 81.8340  19
   1   6 -20 210.361 107.358  14
   1   6 -19 587.980 108.182  11
   1   6 -19 478.156 120.069  14
   1   6 -19 300.523 106.235  19
   1   6 -18 2173.75 213.160  19
   1   6 -18 1856.28 163.980  11
   1   6 -18 2037.22 206.346  14
   1   6 -17 960.629 150.236  19
   1   6 -17 917.321 151.246  14
   1   6 -17 819.747 125.337  11
  -1  -6  16 1673.46 332.160   6
   1   6 -16 1337.16 158.989  19
   1   6 -16 1416.87 155.150  11
   1   6 -16 1545.12 271.446   4
   1   6 -16 1394.88 167.641  14
   1   6 -15 16137.4 529.551  14
   1   6 -15 16252.1 834.811   4
  -1  -6  15 17608.2 985.211   6
   1   6 -15 14589.0 504.048  19
   1   6 -14 5768.25 466.950   4
  -1  -6  14 5434.90 524.616   6
  -1  -6  14 5361.42 389.233  21
   1   6 -13 235.111 111.662   4
  -1  -6  13 300.955 119.366  21
  -1  -6  13 437.489 159.755   6
   1   6 -12 25460.5 933.369   4
  -1  -6  12 24051.2 1044.75   6
  -1  -6  12 24954.3 854.807  21
  -1  -6  11 4755.18 433.074   6
   1   6 -11 5541.68 471.598   2
  -1  -6  11 5224.85 370.956  21
   1   6 -11 5092.83 382.588   4
  -1  -6  10 1833.07 230.290  21
   1   6 -10 2000.55 227.862   4
  -1  -6  10 2315.06 295.454   6
   1   6 -10 1781.81 220.153   5
   1   6 -10 2414.51 304.926   2
  -1  -6   9 21711.3 854.707   6
   1   6  -9 21664.5 872.468   2
   1   6  -9 21460.1 712.403   4
  -1  -6   9 23329.1 798.138  21
  -1  -6   8 1775.03 218.061  21
   1   6  -8 1626.49 221.560   2
   1   6  -8 1512.93 229.284   5
  -1  -6   8 1794.64 228.740   6
   1   6  -8 1462.41 160.368   4
   1   6  -7 20205.9 753.431   2
  -1  -6   7 20166.8 760.725   6
   1   6  -7 20132.3 599.165   4
  -1  -6   7 21490.2 753.927  21
   1   6  -6 5564.21 256.068   1
  -1  -6   6 6472.12 396.828  21
   1   6  -6 5185.95 348.473   2
   1   6  -6 5745.95 277.594   4
  -1  -6   6 5520.10 371.118   6
  -1  -6   5 441.744 54.4751   3
   1   6  -5 316.534 113.214   2
  -1  -6   5 394.520 121.953  21
  -1  -6   5 472.094 115.054   6
   1   6  -5 328.960 65.2816   4
   1   6  -4 291.017 63.3921   4
  -1  -6   4 249.278 52.5458   3
  -1  -6   4 202.149 96.9312  21
   1   6  -4 267.699 102.249   2
  -1  -6   3 37464.0 778.551   3
   1   6  -3 36030.9 715.157   4
   1   6  -3 36944.4 949.117   2
  -1  -6   2 39453.9 874.935   3
   1   6  -2 39385.6 978.856   2
  -1  -6   2 41269.4 1074.37  21
  -1  -6   1 329.601 104.020  21
  -1  -6   1 399.944 92.7323   3
   1   6  -1 185.949 71.6157   2
  -1  -6   0 12441.0 522.317  21
   1   6   0 10681.5 586.412   5
   1   6   0 11592.8 482.325   2
   1   6   0 10829.2 371.284  22
  -1  -6   0 11787.4 495.181   3
  -1  -6  -1 314.039 92.0824  21
   1   6   1 396.372 141.382   5
   1   6   1 261.221 87.6511   2
   1   6   1 431.968 102.255  22
  -1  -6  -1 389.253 120.549   3
   1   6   2 5385.15 313.636  22
  -1  -6  -2 5841.24 394.816   3
   1   6   2 5687.92 409.037   5
  -1  -6  -2 5978.09 314.744  21
   1   6   2 5165.35 335.646   2
   1   6   3 429.092 119.211   2
   1   6   3 395.560 100.145  22
  -1  -6  -3 430.517 84.2570  21
   1   6   3 603.816 150.768   5
   1   6   4 19493.6 727.915   2
   1   6   4 21073.7 747.695   5
  -1  -6  -4 21481.7 893.445   3
  -1  -6  -5 11334.5 663.848   3
   1   6   5 10194.4 492.039   5
   1   6   6 570.356 120.931   5
  -1  -6  -6 637.314 199.290   3
  -1  -6  -7 7858.52 584.739   3
   1   6   7 7504.08 529.499   6
   1   6   8 2939.55 347.478   6
  -1  -6  -8 3372.61 395.774   3
   1   6   9 129.844 134.480   6
  -1  -6  -9 182.911 142.186   3
  -1  -6 -10 17635.9 919.231   3
   1   6  10 16209.6 862.333   6
  -1  -6 -11 23921.9 673.374  19
   1   6  11 21633.9 1029.50   6
  -1  -6 -11 23788.3 691.673  18
  -1  -6 -11 23659.5 677.003  10
  -1  -6 -11 21876.5 576.439  15
  -1  -6 -11 25399.9 1118.85   3
  -1  -6 -12 9610.30 678.262   3
  -1  -6 -12 9887.81 426.320  19
   1   6  12 9029.13 658.973   6
  -1  -6 -12 9959.34 439.265  18
  -1  -6 -12 9117.21 344.713  15
  -1  -6 -12 9695.81 428.997  10
   1   6  13 38548.1 916.052  17
  -1  -6 -13 38275.9 946.587  10
  -1  -6 -13 38161.1 938.928  19
  -1  -6 -13 38664.3 961.819  18
  -1  -6 -14 1289.92 183.207  18
   1   6  14 1671.72 181.359  17
  -1  -6 -14 1593.64 183.706  19
  -1  -6 -14 1408.01 180.178  10
  -1  -6 -15 8768.14 405.032  19
   1   6  15 9104.67 386.772  17
  -1  -6 -15 9101.80 420.706  18
  -1  -6 -15 8668.68 406.819  10
  -1  -6 -16-0.26062 87.0563  19
  -1  -6 -16 76.3493 90.8502  10
   1   6  16 54.2974 81.4742  17
  -1  -6 -17 327.047 100.585  19
   1   6  17 165.546 90.0739  17
  -1  -6 -17 358.112 110.212  10
  -1  -6 -18 1850.83 163.462  19
  -1  -6 -18 1535.28 162.230  10
   1   6  18 1601.22 144.867  17
   1   6  19 1603.41 132.493  17
  -1  -6 -19 1847.93 158.376  10
  -1  -6 -19 1511.71 132.865  19
   1   6  20-22.0758 47.8123  17
  -1  -6 -20 43.5470 40.3134  12
  -1  -6 -20 78.1616 52.2461  19
  -1  -6 -20 31.0765 52.4493  10
   1   7 -24 2100.16 135.599  14
  -1  -7  24 1958.05 130.673  13
  -1  -7  23 1394.98 130.232  13
   1   7 -23 1485.85 134.421  14
  -1  -7  22 111.273 87.5438  13
   1   7 -22 236.993 81.7433  14
  -1  -7  21 1846.96 171.452  13
   1   7 -21 1729.09 175.217  19
   1   7 -21 1854.90 180.187  14
   1   7 -21 1434.65 123.453  11
   1   7 -20 23.2087 78.0228  19
   1   7 -20 23.1258 78.3727  11
   1   7 -20 85.1152 103.271  14
   1   7 -19 565.843 126.682  19
   1   7 -19 484.518 134.188  14
   1   7 -19 572.918 113.089  11
   1   7 -18 1205.15 170.357  14
   1   7 -18 1153.64 148.576  11
   1   7 -18 1296.66 168.645  19
   1   7 -17 203.064 85.6155  19
   1   7 -17-45.4128 85.0193  11
   1   7 -17 139.378 86.8975  14
   1   7 -16 166.028 98.8594  19
   1   7 -16 190.065 106.398  14
   1   7 -16 421.881 185.310   4
  -1  -7  16-135.775 153.924   6
   1   7 -16 119.833 105.905  11
  -1  -7  15 1516.52 284.951   6
  -1  -7  15 1714.34 239.150  21
   1   7 -15 1534.24 164.392  19
   1   7 -15 1784.98 180.291  11
   1   7 -15 1652.62 181.595  14
   1   7 -15 1698.98 262.548   4
   1   7 -14 463.037 121.390  14
  -1  -7  14 270.454 115.773  21
   1   7 -14 515.157 150.222   4
  -1  -7  14 506.318 195.266   6
  -1  -7  13-7.25685 107.052   6
  -1  -7  13 81.4189 99.4696  21
   1   7 -13 14.8194 89.5291   4
  -1  -7  12 7831.12 487.490  21
  -1  -7  12 7831.21 590.850   6
   1   7 -12 7800.56 486.471   4
   1   7 -12 8206.18 605.606   2
   1   7 -11 828.765 224.235   2
  -1  -7  11 669.559 154.376  21
  -1  -7  11 979.719 218.949   6
   1   7 -11 845.796 160.571   4
   1   7 -10 512.791 116.074   4
  -1  -7  10 534.117 149.395   6
   1   7 -10 830.691 198.331   2
  -1  -7  10 722.130 148.159  21
   1   7 -10 878.268 171.287   5
  -1  -7   9 9249.98 572.722   6
  -1  -7   9 9993.15 544.905  21
   1   7  -9 9536.69 587.692   5
   1   7  -9 9810.85 579.171   2
   1   7  -9 9462.78 444.132   4
   1   7  -8 1065.69 189.488   2
  -1  -7   8 1101.19 204.191   6
   1   7  -8 1083.46 229.602   5
  -1  -7   8 1045.36 181.161  21
   1   7  -8 988.747 135.475   4
   1   7  -7 20190.0 593.039   4
  -1  -7   7 20827.4 820.473   6
  -1  -7   7 21433.6 791.852  21
   1   7  -7 21082.9 804.075   2
  -1  -7   6 13498.1 632.308   6
   1   7  -6 12750.1 429.558   4
   1   7  -6 13554.4 616.396   2
  -1  -7   6 14860.3 641.937  21
  -1  -7   5 27745.1 894.164  21
   1   7  -5 26149.1 851.607   2
   1   7  -4 4471.07 331.601   2
  -1  -7   4 4746.96 358.361  21
  -1  -7   4 4751.83 233.000   3
  -1  -7   3 3698.95 227.382   3
  -1  -7   3 4122.91 328.611  21
   1   7  -3 3637.95 289.998   2
  -1  -7   2 266.922 103.954  21
  -1  -7   2 244.162 73.5451   3
   1   7  -2-20.4522 128.946   5
   1   7  -2 309.338 105.986   2
  -1  -7   1 51119.3 1222.69  21
  -1  -7   1 49710.5 1113.63   3
   1   7  -1 47695.6 1188.82   2
  -1  -7   0 6778.39 385.432  21
   1   7   0 5314.48 445.001   5
  -1  -7   0 5943.74 365.813   3
   1   7   0 6348.12 383.908   2
  -1  -7  -1 2210.98 209.157  21
   1   7   1 1764.08 211.443   2
   1   7   1 1746.50 258.606   5
  -1  -7  -1 2190.81 240.046   3
  -1  -7  -2 12320.0 467.158  21
   1   7   2 11883.0 631.365   5
   1   7   2 11984.2 560.747   2
  -1  -7  -2 12458.2 611.804   3
  -1  -7  -3 37442.7 1179.77   3
   1   7   3 35414.9 1065.70   2
   1   7   3 36267.3 1124.76   5
  -1  -7  -4 33627.2 1146.36   3
   1   7   4 31164.7 1001.70   5
   1   7   4 30458.6 999.434   2
   1   7   5 1747.48 239.649   2
  -1  -7  -5 2061.52 297.070   3
   1   7   5 1350.21 190.110   5
   1   7   6 545.854 140.531   2
  -1  -7  -6 389.405 172.222   3
   1   7   6 494.119 128.094   5
   1   7   7 23791.4 1010.89   6
  -1  -7  -7 26817.5 1107.28   3
   1   7   7 23919.8 961.636   2
   1   7   8 11436.8 671.658   2
  -1  -7  -8 12091.9 748.941   3
   1   7   8 11461.6 699.006   6
  -1  -7  -9 11982.3 762.011   3
   1   7   9 11070.5 704.885   6
   1   7   9 11146.4 671.611   2
  -1  -7 -10 4248.85 278.822  18
  -1  -7 -10 4520.05 277.805  10
   1   7  10 3946.14 404.443   2
  -1  -7 -10 4241.31 231.166  15
  -1  -7 -10 5215.01 499.790   3
  -1  -7 -10 4565.54 281.740  19
   1   7  10 4371.27 456.264   6
  -1  -7 -11 19411.4 631.122  18
  -1  -7 -11 18634.2 514.614  15
  -1  -7 -11 19437.8 616.344  19
  -1  -7 -11 19155.7 620.726  10
   1   7  11 17212.4 875.014   2
  -1  -7 -11 20504.2 1009.76   3
  -1  -7 -12 683.306 137.581  10
  -1  -7 -12 492.596 120.439  18
  -1  -7 -12 527.346 103.592  19
  -1  -7 -13 10518.9 460.084  18
   1   7  13 10398.3 427.362  17
  -1  -7 -13 10176.1 445.449  10
  -1  -7 -13 10192.4 437.523  19
  -1  -7 -14 2627.54 229.823  10
  -1  -7 -14 2434.61 217.476  19
   1   7  14 2789.92 218.510  17
  -1  -7 -14 2692.29 235.669  18
   1   7  15 2147.37 193.476  17
  -1  -7 -15 2188.49 202.840  19
  -1  -7 -15 2017.59 198.425  10
  -1  -7 -15 2428.36 214.104  18
   1   7  16 1241.09 145.224  17
  -1  -7 -16 1297.18 151.368  19
  -1  -7 -16 1459.60 166.928  10
   1   7  17 1164.29 133.451  17
  -1  -7 -17 1361.70 151.662  10
  -1  -7 -17 1251.58 135.749  19
  -1  -7 -18 57.3135 59.2090  19
   1   7  18 112.984 61.3438  17
  -1  -7 -18 81.3956 67.8532  10
   1   7  19 262.339 61.0200  17
  -1  -7 -19 251.432 58.7937  19
  -1  -7 -19 448.755 82.6655  10
  -1  -7 -19 273.714 53.5828  12
  -1  -7 -20 92.3601 33.8640  19
  -1  -7 -20 196.902 49.5402  10
   1   7  20 120.059 39.1465  17
  -1  -8  24-7.30963 47.9250  13
   1   8 -24 29.9975 49.2771  14
   1   8 -23 2216.40 159.040  14
  -1  -8  23 2449.61 157.886  13
   1   8 -22 130.805 76.5799  14
  -1  -8  22 185.920 85.3708  13
   1   8 -22 88.9451 49.0636  11
   1   8 -21 4203.17 256.090  14
  -1  -8  21 4279.43 247.191  13
   1   8 -21 3941.74 196.295  11
   1   8 -20 4240.84 272.984  14
   1   8 -20 3868.28 216.803  11
  -1  -8  20 4409.05 269.663  13
  -1  -8  19 229.476 108.775  13
   1   8 -19 199.074 84.0986  11
   1   8 -19 171.520 101.844  14
   1   8 -19-0.27890 75.7334  19
  -1  -8  18 1002.13 147.451  13
   1   8 -18 929.458 143.864  11
   1   8 -18 947.960 158.007  14
   1   8 -18 699.763 133.050  19
   1   8 -17 1335.39 163.897  19
   1   8 -17 1552.67 166.158  11
   1   8 -17 1392.48 183.785  14
  -1  -8  17 1418.99 171.032  13
   1   8 -16 788.090 141.904  14
   1   8 -16 1031.50 149.206  11
   1   8 -16 1012.31 147.770  19
  -1  -8  15 4721.25 396.098  21
   1   8 -15 4469.60 276.671  11
   1   8 -15 4349.98 275.251  19
  -1  -8  15 4960.71 539.393   6
   1   8 -15 4791.37 291.363  14
  -1  -8  14 1216.28 214.750  21
   1   8 -14 1564.70 175.807  11
   1   8 -14 1336.62 162.196  14
   1   8 -14 1296.63 150.276  19
  -1  -8  14 1171.71 275.307   6
  -1  -8  13 7277.23 503.691  21
  -1  -8  13 7232.87 611.772   6
   1   8 -12 57.0371 157.490   2
  -1  -8  12 42.7761 114.704  21
  -1  -8  12 300.935 171.745   6
  -1  -8  11 1312.36 213.279  21
  -1  -8  11 1293.57 257.800   6
   1   8 -11 1776.76 289.588   2
   1   8 -10 183.920 103.387   5
  -1  -8  10 486.640 158.996  21
  -1  -8  10 231.322 128.592   6
   1   8 -10 17.9305 121.181   2
   1   8  -9 64372.5 1716.11   2
  -1  -8   9 64797.2 1619.43  21
   1   8  -9 60119.7 1734.13   5
  -1  -8   9 62603.0 1725.51   6
  -1  -8   8 55902.6 1567.44   6
  -1  -8   8 56046.6 1484.00  21
   1   8  -8 52118.4 1639.22   5
   1   8  -8 55569.5 1530.71   2
   1   8  -7 241.286 166.567   5
  -1  -8   7-23.1532 93.2864   6
   1   8  -7-8.18435 99.0731   2
  -1  -8   7-87.7021 117.384  21
   1   8  -6 1485.19 218.600   2
  -1  -8   6 1985.23 256.043  21
   1   8  -6 1502.86 278.882   5
  -1  -8   5 4798.77 384.400  21
   1   8  -5 3591.46 422.980   5
   1   8  -5 4322.73 357.019   2
  -1  -8   4 1529.52 223.628  21
   1   8  -4 1594.73 297.217   5
   1   8  -4 1663.18 223.704   2
   1   8  -3 429.748 138.880   2
  -1  -8   3 455.591 127.896  21
  -1  -8   3 477.830 98.8627   3
   1   8  -3 248.649 154.806   5
  -1  -8   2 2478.85 264.783  21
   1   8  -2 2194.74 262.543   2
  -1  -8   2 2410.24 214.437   3
   1   8  -2 1956.79 314.614   5
   1   8  -1 32575.0 1229.94   5
  -1  -8   1 34621.1 934.135   3
  -1  -8   1 36171.0 1024.84  21
   1   8  -1 35213.8 1046.04   2
  -1  -8   0 7280.53 422.509   3
   1   8   0 6996.66 535.117   5
   1   8   0 7668.58 458.282   2
  -1  -8   0 8116.46 432.212  21
   1   8   1 10921.0 565.171   2
  -1  -8  -1 11876.0 499.469  21
  -1  -8  -1 11620.4 571.412   3
   1   8   1 11257.1 663.151   5
   1   8   2 567.282 164.545   5
   1   8   2 980.956 186.780   2
  -1  -8  -2 869.185 179.129   3
   1   8   3 82.2495 75.9448   2
   1   8   3-132.153 97.1460   5
  -1  -8  -3 47.7287 111.253   3
   1   8   4 1160.28 215.694   2
  -1  -8  -4 915.537 213.892   3
   1   8   4 1286.44 216.334   5
   1   8   5 563.279 169.547   2
  -1  -8  -5 372.900 167.662   3
   1   8   5 216.181 94.0135   5
  -1  -8  -6 842.774 200.117   3
   1   8   6 681.621 187.885   2
  -1  -8  -7 1625.73 267.713   3
   1   8   7 1479.22 253.136   2
   1   8   7 1162.11 236.154   6
  -1  -8  -8 842.998 212.161   3
  -1  -8  -8 557.702 111.602  18
  -1  -8  -8 695.856 107.002  15
  -1  -8  -8 675.958 125.017  10
   1   8   8 368.723 143.386   6
   1   8   8 497.843 138.731   2
  -1  -8  -8 652.961 121.559  19
  -1  -8  -9 7341.10 374.893  18
  -1  -8  -9 7432.70 361.087  10
  -1  -8  -9 7749.88 617.780   3
  -1  -8  -9 6997.56 290.557  15
  -1  -8  -9 6666.76 338.682  19
  -1  -8 -10 25159.5 737.646  18
  -1  -8 -10 23525.0 598.845  15
  -1  -8 -10 24092.0 701.596  19
  -1  -8 -10 24788.0 716.206  10
  -1  -8 -11 19077.2 617.963  10
  -1  -8 -11 18895.7 633.331  18
  -1  -8 -11 17323.3 498.146  15
  -1  -8 -11 18857.4 606.118  19
   1   8  12 12805.8 478.410  17
  -1  -8 -12 13059.4 520.582  18
  -1  -8 -12 12460.6 485.610  19
  -1  -8 -12 12177.0 495.792  10
  -1  -8 -13 1118.06 166.336  18
  -1  -8 -13 1005.69 151.618  19
  -1  -8 -13 1555.91 184.841  10
   1   8  13 1115.28 156.002  17
  -1  -8 -14 515.625 131.498  18
  -1  -8 -14 444.337 117.491  10
  -1  -8 -14 439.366 115.735  19
   1   8  14 446.899 103.164  17
  -1  -8 -15 813.601 123.219  19
  -1  -8 -15 522.929 118.912  10
  -1  -8 -15 833.201 133.409  18
   1   8  15 840.246 128.687  17
  -1  -8 -16 393.821 93.2431  19
  -1  -8 -16 359.714 100.863  10
   1   8  16 525.746 103.036  17
  -1  -8 -17 203.633 82.6060  10
   1   8  17 267.874 72.8381  17
  -1  -8 -17 284.220 72.5872  19
  -1  -8 -18 299.023 44.4485  12
   1   8  18 374.311 72.9853  17
  -1  -8 -18 525.407 81.2813  10
  -1  -8 -18 448.986 71.1023  19
  -1  -8 -19 1346.96 94.8734  10
  -1  -8 -19 1163.19 76.2741  19
  -1  -9  24 5086.03 184.313  13
  -1  -9  23 747.005 94.7565  13
   1   9 -23 699.363 94.3082  14
   1   9 -22 495.221 68.1434  11
   1   9 -22 541.001 94.4316  14
  -1  -9  22 682.937 102.748  13
   1   9 -21 670.516 87.4556  11
   1   9 -21 544.182 110.539  14
  -1  -9  21 695.732 123.033  13
   1   9 -20 139.326 90.8562  14
   1   9 -20 149.652 81.3814  11
  -1  -9  20 130.006 82.7220  13
   1   9 -19 217.596 105.358  14
  -1  -9  19 100.199 87.6474  13
   1   9 -19 63.5691 78.1691  11
   1   9 -18 1947.86 182.645  11
  -1  -9  18 2074.91 201.712  13
   1   9 -18 2075.31 206.177  14
   1   9 -17 10282.8 413.199  11
   1   9 -17 10131.5 443.555  14
  -1  -9  17 10078.9 430.510  13
  -1  -9  16 7700.55 365.404  13
   1   9 -16 7642.62 364.276  11
   1   9 -16 7835.32 383.926  14
  -1  -9  15 1290.59 172.890  13
   1   9 -15 1278.32 172.354  11
   1   9 -15 1080.08 147.680  14
   1   9 -14 1848.86 186.705  11
  -1  -9  14 1921.74 282.320  21
  -1  -9  14 1409.42 271.067   6
   1   9 -14 1742.83 188.628  14
  -1  -9  14 2382.81 197.965  13
   1   9 -13 854.062 131.706  11
   1   9 -13 828.694 137.448  14
  -1  -9  13 980.827 212.823  21
  -1  -9  13 609.040 200.557   6
  -1  -9  13 720.621 120.819  13
   1   9 -13 867.903 253.616   2
  -1  -9  12 411.833 148.633  21
  -1  -9  12 458.925 105.283  13
   1   9 -12 146.012 159.097   2
   1   9 -12 280.662 87.3363  14
   1   9 -12 206.518 102.776  11
  -1  -9  12 72.6363 129.996   6
  -1  -9  11 3735.97 427.129   6
  -1  -9  11 3620.25 378.898  21
   1   9 -11 3673.70 417.038   2
  -1  -9  10 9752.75 602.921  21
   1   9 -10 9738.78 666.809   2
   1   9 -10 9401.65 649.167   5
  -1  -9  10 9765.03 662.982   6
  -1  -9   9 6284.08 476.724  21
  -1  -9   9 6248.57 517.897   6
   1   9  -9 6095.79 490.229   2
   1   9  -9 5374.25 501.811   5
   1   9  -8 595.996 197.209   5
  -1  -9   8 531.392 155.148  21
   1   9  -8 507.614 157.281   2
   1   9  -7 25.9980 91.7332   2
  -1  -9   7 145.743 110.236  21
   1   9  -7 282.996 172.404   5
   1   9  -6 17794.1 991.662   5
   1   9  -6 18782.8 821.346   2
  -1  -9   6 19852.1 829.298  21
  -1  -9   5 16972.5 751.557  21
   1   9  -5 16112.6 735.143   2
   1   9  -5 15584.6 916.181   5
   1   9  -4 4182.85 482.906   5
   1   9  -4 4864.10 389.445   2
  -1  -9   4 4569.49 387.593  21
   1   9  -3 2237.83 348.607   5
   1   9  -3 2643.96 300.191   2
  -1  -9   3 2673.32 295.467  21
  -1  -9   2 4253.49 363.286  21
  -1  -9   2 4425.22 299.839   3
   1   9  -2 3946.82 431.942   5
   1   9  -2 3917.08 355.240   2
   1   9  -1 1051.46 254.701   5
  -1  -9   1 1546.78 207.199  21
   1   9  -1 1799.61 245.093   2
  -1  -9   1 1814.46 203.954   3
   1   9   0 3100.09 370.793   5
  -1  -9   0 3969.60 322.749   3
  -1  -9   0 3979.53 313.352  21
   1   9   0 3971.79 355.095   2
   1   9   1 621.539 182.619   5
  -1  -9  -1 950.111 184.131   3
   1   9   1 1128.00 188.165   2
  -1  -9  -2 11305.7 617.074   3
   1   9   2 10955.2 664.461   5
   1   9   2 11245.2 621.128   2
   1   9   3 203.989 123.793   2
  -1  -9  -3 295.110 138.195   3
   1   9   3 416.623 175.971   5
   1   9   4 662.573 182.886   2
  -1  -9  -4 638.298 180.470   3
   1   9   4 912.508 183.329   5
  -1  -9  -5 5230.39 466.435   3
   1   9   5 5215.83 445.519   2
   1   9   5 5357.26 417.367   5
  -1  -9  -6 3509.80 194.516  15
  -1  -9  -6 3452.41 246.288  18
  -1  -9  -6 3891.58 416.804   3
  -1  -9  -6 3471.86 231.646  10
  -1  -9  -7 186.535 84.1698  10
  -1  -9  -7 187.950 176.956   3
  -1  -9  -7 152.792 70.9801  15
  -1  -9  -7 319.313 109.738  18
  -1  -9  -7 123.148 67.8647  19
   1   9   7 40.5296 57.8044  16
  -1  -9  -8 1684.32 284.536   3
  -1  -9  -8 1591.34 179.656  18
  -1  -9  -8 1420.57 128.880  15
  -1  -9  -8 1439.46 163.376  19
   1   9   8 1617.68 145.868  16
  -1  -9  -8 1416.68 173.955  10
  -1  -9  -9 1060.47 146.227  19
  -1  -9  -9 865.238 137.523  10
  -1  -9  -9 883.117 116.931  15
  -1  -9  -9 1145.94 166.307  18
  -1  -9 -10 2631.16 219.663  19
  -1  -9 -10 3114.95 245.602  10
  -1  -9 -10 2828.45 246.920  18
  -1  -9 -10 2758.30 182.557  15
  -1  -9 -11 103.258 75.1294  19
  -1  -9 -11 192.669 104.937  18
  -1  -9 -11 48.8479 87.3687  10
  -1  -9 -12 233.981 105.243  18
   1   9  12 324.992 108.115  17
  -1  -9 -12 288.017 110.672  10
  -1  -9 -12 394.941 114.687  19
   1   9  13 133.186 80.3552  17
  -1  -9 -13 162.747 94.6384  10
  -1  -9 -13 313.743 115.420  18
  -1  -9 -13 171.209 73.5440  19
   1   9  14 680.252 119.469  17
  -1  -9 -14 538.205 101.288  19
  -1  -9 -14 575.444 121.483  18
  -1  -9 -14 508.317 110.461  10
  -1  -9 -15 2680.19 196.247  10
   1   9  15 2427.77 174.936  17
  -1  -9 -15 2580.69 202.334  18
  -1  -9 -15 2535.58 177.539  19
  -1  -9 -16 243.262 68.6393  19
  -1  -9 -16 327.426 79.6594  10
   1   9  16 164.622 66.4303  17
  -1  -9 -17 1009.23 90.4946  19
  -1  -9 -17 1227.82 111.920  10
   1   9  17 947.438 98.1539  17
  -1  -9 -18-53.2471 39.5143  10
   1   9  18 95.6692 40.9135  17
  -1 -10  23 38.1938 48.9914  13
   1  10 -23-21.8358 26.8456  11
   1  10 -22 1689.70 109.339  11
  -1 -10  22 1820.03 141.636  13
   1  10 -21 1444.52 149.841  14
  -1 -10  21 1661.24 148.855  13
   1  10 -21 1248.72 114.323  11
   1  10 -20 296.881 83.5036  11
  -1 -10  20 228.774 90.8478  13
   1  10 -20 294.460 97.3946  14
  -1 -10  19 3825.78 254.813  13
   1  10 -19 4055.68 259.499  14
   1  10 -19 3751.72 229.371  11
  -1 -10  18 2041.39 201.949  13
   1  10 -18 1909.87 181.519  11
   1  10 -18 2313.75 209.162  14
   1  10 -17 1544.13 166.614  11
   1  10 -17 1889.11 204.668  14
  -1 -10  17 1838.29 192.519  13
  -1 -10  16 95.1984 109.448  13
   1  10 -16 83.5648 100.378  11
   1  10 -16 230.621 110.851  14
  -1 -10  15 1090.53 159.887  13
   1  10 -15 1077.83 157.887  11
   1  10 -15 1106.85 173.588  14
   1  10 -14 4372.68 283.697  11
   1  10 -14 4218.79 237.433  20
  -1 -10  14 4471.70 279.013  13
   1  10 -14 4145.23 269.596  14
   1  10 -13 2948.38 203.314  20
   1  10 -13 3264.02 240.296  11
  -1 -10  13 3204.00 236.605  13
   1  10 -13 3319.58 239.511  14
   1  10 -13 3381.85 415.819   2
   1  10 -12 11951.8 789.974   2
  -1 -10  12 11188.7 773.349   6
  -1 -10  12 12206.4 696.652  21
   1  10 -12 11246.8 403.659  20
   1  10 -12 11176.1 423.937  14
  -1 -10  12 11329.4 430.445  13
   1  10 -12 12112.0 453.427  11
   1  10 -11 3467.86 431.752   2
   1  10 -11 3904.08 240.029  14
   1  10 -11 3382.52 222.932  20
  -1 -10  11 3641.39 384.801  21
   1  10 -11 3636.32 243.534  11
  -1 -10  11 3411.63 227.841  13
   1  10 -10 538.132 189.990   5
  -1 -10  10 530.598 105.125  13
   1  10 -10 888.909 244.926   2
  -1 -10  10 519.579 175.994  21
   1  10 -10 720.603 116.452  11
   1  10  -9 26187.8 1093.35   2
   1  10  -9 25081.9 1150.39   5
  -1 -10   9 28256.1 1069.07  21
   1  10  -8 2650.90 402.901   5
   1  10  -8 1801.92 277.776   2
  -1 -10   8 2310.40 307.224  21
   1  10  -7 11997.5 816.020   5
   1  10  -7 10868.6 653.909   2
  -1 -10   7 12009.3 669.089  21
  -1 -10   6 471.238 152.941  21
   1  10  -6 424.217 204.823   5
   1  10  -6 526.790 146.668   2
   1  10  -5 163.865 124.495   2
  -1 -10   5 49.8696 110.199  21
   1  10  -5 411.705 216.140   5
   1  10  -4 241.583 88.1164   2
   1  10  -4 119.769 187.442   5
  -1 -10   4 249.639 115.444  21
  -1 -10   3 1626.18 228.049  21
   1  10  -3 1420.88 232.063   2
   1  10  -3 1590.76 325.374   5
   1  10  -2 2078.23 348.187   5
   1  10  -2 2122.87 275.428   2
  -1 -10   2 2383.26 272.292  21
   1  10  -1 184.261 127.977   2
  -1 -10   1 98.4291 80.3186  21
  -1 -10   1 76.7400 76.9598   3
   1  10  -1 183.474 153.762   5
   1  10   0 6662.21 559.500   5
  -1 -10   0 7180.59 452.396   3
   1  10   0 6820.27 487.355   2
   1  10   1 95.1132 103.789   2
  -1 -10  -1 344.034 136.495   3
   1  10   1 201.518 144.606   5
   1  10   2 5296.28 474.372   5
  -1 -10  -2 6204.76 463.585   3
  -1 -10  -3 5358.65 450.084   3
   1  10   3 5132.54 442.119   5
  -1 -10  -3 5591.82 301.490  18
   1  10   4 37.0274 97.4470   5
  -1 -10  -4 157.277 70.9078  15
  -1 -10  -4 348.040 137.385   3
   1  10   4 129.211 73.3586  16
  -1 -10  -4 58.7153 81.1789  10
  -1 -10  -4 68.5179 88.5345  18
  -1 -10  -5 5202.66 304.605  18
  -1 -10  -5 4475.62 221.999  15
  -1 -10  -5 5290.23 480.061   3
  -1 -10  -5 4625.10 278.790  19
  -1 -10  -5 4660.62 276.653  10
   1  10   5 4854.69 266.887  16
  -1 -10  -6 5230.75 303.519  19
  -1 -10  -6 5711.57 330.851  18
   1  10   6 5667.72 286.498  16
  -1 -10  -6 5826.58 313.117  10
  -1 -10  -6 6025.94 527.552   3
  -1 -10  -6 5810.55 257.199  15
  -1 -10  -7 125.704 79.1416  19
  -1 -10  -7 113.725 71.2047  15
  -1 -10  -7 284.472 101.839  10
  -1 -10  -7 168.739 120.870  18
   1  10   7 109.953 70.7020  16
   1  10   8 596.455 103.072  16
  -1 -10  -8 743.006 140.431  18
  -1 -10  -8 680.740 105.761  15
  -1 -10  -8 677.844 126.114  19
  -1 -10  -8 944.802 148.864  10
  -1 -10  -9 1088.44 161.707  18
  -1 -10  -9 1282.32 161.213  19
  -1 -10  -9 1283.37 166.647  10
  -1 -10 -10-30.4960 99.9647  18
  -1 -10 -10 273.429 106.859  10
  -1 -10 -10 95.1103 87.9253  19
  -1 -10 -11 200.860 92.5843  19
  -1 -10 -11 239.980 107.194  18
  -1 -10 -11 444.347 117.169  10
   1  10  11 288.776 99.6871  17
  -1 -10 -12 2369.73 196.741  10
  -1 -10 -12 2451.97 217.584  18
  -1 -10 -12 2355.10 189.888  19
   1  10  12 2181.54 189.876  17
   1  10  13 73.2349 74.7456  17
  -1 -10 -13 92.3424 82.5182  18
  -1 -10 -13 131.330 86.2908  19
  -1 -10 -13 196.727 91.3546  10
  -1 -10 -14 1426.39 151.810  18
  -1 -10 -14 1505.79 149.044  10
  -1 -10 -14 1369.09 128.589  19
   1  10  14 1454.25 133.743  17
  -1 -10 -15 1560.53 123.769  19
  -1 -10 -15 1675.21 144.220  10
   1  10  15 1745.44 133.439  17
  -1 -10 -16 3.15845 36.8476  19
   1  10  16 86.1865 50.4703  17
  -1 -10 -16 96.2583 51.9863  10
   1  10  17 118.661 41.0375  17
  -1 -10 -17 131.849 41.5399  10
  -1 -11  22 247.747 64.4392  13
   1  11 -22 128.840 43.8355  11
   1  11 -21 3349.15 168.452  11
  -1 -11  21 3606.33 199.017  13
  -1 -11  20 1238.11 142.528  13
   1  11 -20 1119.41 115.538  11
  -1 -11  19 1793.56 177.488  13
   1  11 -19 1724.57 157.800  11
   1  11 -18 5342.55 280.687  11
   1  11 -18 5757.75 303.436  14
  -1 -11  18 5928.01 313.107  13
   1  11 -17 302.483 115.833  11
  -1 -11  17 339.066 120.114  13
   1  11 -17 208.753 93.0114  14
  -1 -11  16 793.856 142.488  13
   1  11 -16 861.868 147.002  14
   1  11 -16 905.073 144.911  11
  -1 -11  15 162.002 110.294  13
   1  11 -15 47.9294 81.0567  14
   1  11 -15 78.1736 89.5588  11
   1  11 -14 1712.83 162.113  20
  -1 -11  14 1981.06 201.099  13
   1  11 -14 1745.36 182.747  14
   1  11 -14 1598.62 190.036  11
  -1 -11  13 253.546 100.344  13
   1  11 -13 124.061 90.3351  11
   1  11 -13 211.986 93.3546  14
   1  11 -13 139.140 74.0373  20
   1  11 -12 110.827 75.4192  20
  -1 -11  12 95.0329 82.6007  13
   1  11 -12 134.955 97.9015  11
   1  11 -11 9950.94 391.711  20
  -1 -11  11 9648.97 402.415  13
   1  11 -10 29347.3 738.160  20
  -1 -11  10 29118.4 742.718  13
   1  11 -10 27245.8 1197.61   5
  -1 -11  10 30601.6 1162.55  21
   1  11 -10 29915.4 741.948  11
   1  11 -10 30223.8 792.641  16
  -1 -11   9 163.382 98.6063  13
   1  11  -9 189.555 84.2218  20
  -1 -11   9 215.890 154.160  21
   1  11  -9 77.5396 83.2870  16
   1  11  -9 134.316 167.938   5
   1  11  -9 159.887 74.1478  11
  -1 -11   8 1285.08 249.995  21
   1  11  -8 1529.23 147.858  11
  -1 -11   8 1461.99 164.323  18
   1  11  -8 1430.69 182.438  16
   1  11  -8 1437.72 157.032  20
  -1 -11   8 1237.37 140.142  13
   1  11  -8 1454.79 301.256   5
  -1 -11   7 16302.1 536.865  18
   1  11  -7 14925.3 495.857  20
   1  11  -7 15029.0 543.439  16
   1  11  -7 15268.8 447.421  11
  -1 -11   7 15280.7 781.740  21
   1  11  -7 15219.2 950.883   5
  -1 -11   7 14832.4 473.103  13
  -1 -11   6 3156.53 234.412  18
  -1 -11   6 2696.92 335.251  21
   1  11  -6 3507.99 485.312   5
  -1 -11   5 384.117 164.787  21
  -1 -11   5 169.365 79.7646  18
   1  11  -5 483.974 217.437   5
   1  11  -4 405.126 197.487   5
  -1 -11   4 491.355 168.248  21
   1  11  -3 3519.23 461.409   5
  -1 -11   3 3469.49 348.487  21
  -1 -11   2 11910.4 446.273  18
   1  11  -2 11831.7 461.859  16
   1  11  -2 12264.3 821.035   5
  -1 -11   2 11678.6 613.991  21
   1  11  -1 376.720 106.045  16
  -1 -11   1 365.261 91.7044  18
   1  11  -1 238.803 163.493   5
   1  11   0 4523.24 469.412   5
   1  11   0 5297.60 302.279  16
  -1 -11   0 4967.26 268.364  10
  -1 -11   0 5153.30 291.880  18
  -1 -11  -1 89.2555 73.5495  13
   1  11   1 324.326 149.513   5
  -1 -11  -1 331.108 139.902   3
   1  11   1 152.153 86.0722  16
  -1 -11  -1 219.499 90.4719  18
  -1 -11  -1 96.0678 76.1868  10
   1  11   2 3384.25 392.717   5
  -1 -11  -2 3305.09 239.680  18
  -1 -11  -2 2959.55 196.111  13
  -1 -11  -2 3371.72 228.139  10
  -1 -11  -2 2703.05 310.828   3
   1  11   2 3437.80 238.091  16
   1  11   3 8538.91 601.838   5
  -1 -11  -3 8700.17 376.548  10
  -1 -11  -3 8371.46 332.235  13
  -1 -11  -3 8570.36 299.895  15
  -1 -11  -3 9400.17 413.031  18
   1  11   3 9237.42 393.256  16
  -1 -11  -3 10043.0 620.959   3
   1  11   4 6145.32 314.160  16
  -1 -11  -4 5945.08 492.144   3
  -1 -11  -4 6330.76 347.176  18
  -1 -11  -4 6066.03 314.529  10
  -1 -11  -4 5427.09 264.893  13
  -1 -11  -4 5958.05 252.996  15
  -1 -11  -4 5586.15 309.498  19
   1  11   5 1236.05 157.775  16
  -1 -11  -5 1244.76 173.045  18
  -1 -11  -5 1186.52 149.436  10
  -1 -11  -5 1278.74 127.543  15
  -1 -11  -5 1206.61 160.215  19
  -1 -11  -5 1047.54 133.320  13
  -1 -11  -6 1505.49 181.097  18
   1  11   6 1440.92 157.764  16
  -1 -11  -6 1448.77 169.072  19
  -1 -11  -6 1539.11 174.322  10
  -1 -11  -6 1285.15 131.389  15
   1  11   7 8991.11 358.659  16
  -1 -11  -7 9239.39 426.204  18
  -1 -11  -7 8549.66 390.716  10
  -1 -11  -7 8530.78 394.815  19
  -1 -11  -8 7083.29 348.036  19
   1  11   8 7657.39 311.982  16
  -1 -11  -8 6942.08 380.196  18
  -1 -11  -8 7423.79 359.903  10
  -1 -11  -9 987.389 145.492  19
   1  11   9 1044.63 116.917  16
  -1 -11  -9 1026.86 157.825  18
  -1 -11  -9 1017.77 152.066  10
  -1 -11 -10 2855.07 216.972  10
  -1 -11 -10 2648.93 195.757  19
   1  11  10 2605.25 199.247  17
  -1 -11 -10 2767.14 169.275  20
  -1 -11 -10 2920.77 235.930  18
  -1 -11 -11 5078.78 280.593  10
  -1 -11 -11 5108.82 298.893  18
  -1 -11 -11 4841.35 255.745  19
   1  11  11 4839.60 256.404  17
  -1 -11 -12 130.590 78.8815  10
  -1 -11 -12 74.4751 61.4268  19
   1  11  12-53.7022 65.9667  17
  -1 -11 -12 131.257 85.8633  18
  -1 -11 -13 89.4733 68.9650  10
   1  11  13 120.593 62.5842  17
  -1 -11 -13 79.6363 71.5098  18
  -1 -11 -13 41.3244 53.9767  19
  -1 -11 -14 1474.29 136.542  18
   1  11  14 1414.65 118.151  17
  -1 -11 -14 1393.91 121.013  10
  -1 -11 -14 1363.57 107.005  19
   1  11  15 2407.63 131.072  17
  -1 -11 -15 2554.44 137.270  10
  -1 -11 -15 2322.87 113.617  19
  -1 -12  22 49.1446 32.4261  18
   1  12 -22 29.1372 29.0451  11
  -1 -12  22 37.3439 37.3155  13
  -1 -12  21 330.724 66.4989  18
   1  12 -21 390.410 60.9396  11
  -1 -12  20 803.888 108.095  13
   1  12 -20 775.875 93.7154  11
  -1 -12  19 15.7665 79.5698  13
   1  12 -19 83.5069 71.8840  11
  -1 -12  18 3611.23 233.185  13
   1  12 -18 3597.96 220.834  11
  -1 -12  17 2176.09 194.778  13
   1  12 -17 2381.13 191.604  11
   1  12 -16 399.492 112.817  11
  -1 -12  16 363.182 111.146  13
   1  12 -15 497.488 109.970  11
  -1 -12  15 456.981 114.273  13
  -1 -12  14 3722.05 254.993  13
   1  12 -14 3831.09 258.489  11
   1  12 -13 1704.82 184.063  11
   1  12 -13 1530.56 154.853  20
  -1 -12  13 1938.04 189.839  13
  -1 -12  12 5758.74 312.383  13
   1  12 -12 5182.67 285.727  20
   1  12 -12 5970.84 313.634  11
   1  12 -11 598.790 107.579  20
   1  12 -11 895.789 145.314  11
  -1 -12  11 725.494 136.407  13
  -1 -12  10 2477.80 230.488  18
  -1 -12  10 2735.62 213.320  13
   1  12 -10 2855.12 211.283  11
   1  12 -10 2860.18 218.603  20
   1  12 -10 2969.93 237.906  16
   1  12  -9 318.624 99.9985  11
   1  12  -9 203.873 109.912  16
  -1 -12   9 148.558 89.4129  13
  -1 -12   9 347.740 116.276  18
   1  12  -8 8917.97 347.005  11
  -1 -12   8 9495.77 421.592  18
   1  12  -8 9213.67 437.597  16
  -1 -12   8 8402.40 364.628  13
  -1 -12   7 366.191 172.928  21
  -1 -12   7 160.365 99.8029  18
  -1 -12   7 80.6898 77.0157  13
   1  12  -7 217.949 108.551  16
   1  12  -7 294.162 227.508   5
   1  12  -7 147.169 82.2609  11
  -1 -12   6 418.656 127.723  21
   1  12  -6 310.045 117.640  16
  -1 -12   6 155.026 80.3230  13
   1  12  -6 112.401 70.5848  11
   1  12  -6 17.2726 161.753   5
  -1 -12   6 218.667 90.9574  18
   1  12  -5 3.90492 88.3058  16
  -1 -12   5 36.8966 94.0428  18
  -1 -12   5 91.4123 76.9269  13
   1  12  -5-1.01383 209.694   5
   1  12  -4 3161.61 259.436  16
  -1 -12   4 2753.56 332.140  21
   1  12  -4 3386.62 478.374   5
  -1 -12   4 3265.42 240.269  18
  -1 -12   4 3070.99 206.892  13
  -1 -12   3 19444.3 604.767  18
  -1 -12   3 18461.5 805.136  21
   1  12  -3 18269.8 624.047  16
   1  12  -3 18837.7 1048.38   5
  -1 -12   3 16689.7 509.999  13
  -1 -12   2 1146.60 137.926  13
  -1 -12   2 1312.17 163.635  18
   1  12  -2 1307.60 170.603  16
   1  12  -2 1460.89 325.565   5
  -1 -12   2 1384.09 158.265  10
  -1 -12   1 8107.11 350.212  10
   1  12  -1 8602.58 403.809  16
  -1 -12   1 7637.76 373.049  18
   1  12  -1 8202.15 655.707   5
  -1 -12   1 7261.94 315.160  13
  -1 -12   0 241.207 101.887  18
   1  12   0 333.599 111.092  16
  -1 -12   0 400.384 96.1265  10
  -1 -12   0 284.225 75.0216  13
  -1 -12  -1-70.2893 88.0151  10
   1  12   1-24.8506 91.1723  16
  -1 -12  -1 89.1670 71.3789  13
  -1 -12  -1-26.2546 89.3709  18
  -1 -12  -2 11549.1 437.878  10
  -1 -12  -2 12065.2 481.247  18
   1  12   2 12520.5 472.265  16
  -1 -12  -3 5189.24 301.722  19
  -1 -12  -3 5446.22 303.845  10
   1  12   3 5373.02 310.761  16
  -1 -12  -3 5607.69 331.082  18
  -1 -12  -3 5074.50 263.862  13
  -1 -12  -4 361.903 107.633  10
  -1 -12  -4 240.299 90.3875  19
  -1 -12  -4 297.806 85.7570  13
   1  12   4 233.770 102.554  16
  -1 -12  -4 263.497 112.330  18
  -1 -12  -5 207.752 86.7722  19
   1  12   5 274.133 87.7854  16
  -1 -12  -5 208.691 77.5240  13
  -1 -12  -5 312.644 117.952  18
  -1 -12  -5 332.526 109.024  10
  -1 -12  -6 740.606 130.475  10
   1  12   6 750.552 129.167  16
  -1 -12  -6 756.995 139.108  18
  -1 -12  -6 641.920 120.564  19
   1  12   7 4681.25 246.305  16
  -1 -12  -7 4847.48 276.776  19
  -1 -12  -7 5121.44 315.443  18
  -1 -12  -7 5009.95 285.265  10
   1  12   8 11571.2 374.892  16
  -1 -12  -8 11320.2 439.732  10
  -1 -12  -8 10575.7 414.446  19
  -1 -12  -8 11761.8 468.814  18
  -1 -12  -9 2907.37 183.011  20
  -1 -12  -9 3156.90 252.136  18
  -1 -12  -9 3034.17 216.079  10
   1  12   9 3431.27 179.783  16
   1  12   9 2981.17 200.677  17
  -1 -12  -9 2804.10 199.680  19
  -1 -12 -10 85.7027 80.1171  10
  -1 -12 -10-39.0041 56.8225  19
   1  12  10 65.9527 67.3648  17
  -1 -12 -10-51.4656 84.3557  18
  -1 -12 -10 143.417 65.9229  20
  -1 -12 -11 2353.55 159.695  19
  -1 -12 -11 2562.44 199.647  18
   1  12  11 2448.43 159.642  17
  -1 -12 -11 2512.37 175.264  10
  -1 -12 -12 2708.62 168.911  10
   1  12  12 2434.02 149.070  17
  -1 -12 -12 2310.77 141.400  19
  -1 -12 -12 2598.19 184.186  18
   1  12  13 39.0879 44.5775  17
  -1 -12 -13 51.1571 33.4419  19
  -1 -12 -13 190.130 67.0544  18
  -1 -12 -13 56.2057 49.5448  10
  -1 -12 -14 929.958 75.6641  10
   1  12  14 834.615 72.7396  17
   1  13 -21 542.375 47.7295   7
  -1 -13  21 779.850 75.6902  13
   1  13 -21 731.536 65.1198  11
  -1 -13  21 589.528 62.3654  18
   1  13 -20 473.620 65.6644  11
  -1 -13  20 468.304 74.2674  18
  -1 -13  20 415.165 73.6855  13
  -1 -13  19 54.9923 54.2220  18
   1  13 -19 190.623 68.5392  11
  -1 -13  19 209.204 75.8410  13
  -1 -13  18 31.1930 72.9018  13
  -1 -13  18 79.4016 65.2837  18
   1  13 -18-108.070 74.7340  11
   1  13 -17 1714.24 153.952  11
  -1 -13  17 1406.58 158.302  18
  -1 -13  17 1252.66 145.538  13
   1  13 -16 408.555 105.875  11
  -1 -13  16 272.774 102.105  18
  -1 -13  16 336.286 91.9073  13
  -1 -13  15 599.584 119.386  13
   1  13 -15 590.066 120.733  11
  -1 -13  15 668.117 130.998  18
  -1 -13  14 387.173 119.261  13
  -1 -13  14 215.139 112.380  18
   1  13 -14 196.690 84.4000  11
  -1 -13  13 249.430 106.459  13
   1  13 -13 331.656 101.064  11
  -1 -13  13 274.002 120.508  18
   1  13 -12 239.034 106.093  11
  -1 -13  12 251.411 99.9481  18
  -1 -13  12 96.1081 86.1759  13
   1  13 -11 32.9486 86.0639  11
  -1 -13  11-57.8081 102.052  18
  -1 -13  11 70.3706 86.3028  13
   1  13 -11 71.6147 95.2261  16
   1  13 -10 1911.73 203.637  16
   1  13 -10 1823.78 166.581  11
  -1 -13  10 1672.92 171.768  13
  -1 -13  10 1637.34 187.601  18
   1  13  -9-48.7502 84.2944  11
  -1 -13   9 227.866 107.570  18
  -1 -13   9 70.0535 86.3875  13
   1  13  -9 152.684 109.298  16
  -1 -13   8 1136.94 151.190  13
   1  13  -8 986.617 159.911  16
  -1 -13   8 1204.03 169.765  18
   1  13  -8 1112.98 129.070  11
   1  13  -7 362.552 87.5153  11
  -1 -13   7 472.923 127.320  18
   1  13  -7 351.863 130.070  16
  -1 -13   7 260.274 95.1068  13
   1  13  -6 3809.93 208.827  11
   1  13  -6 3750.69 287.665  16
  -1 -13   6 3218.71 227.814  13
  -1 -13   6 3750.11 263.356  18
   1  13  -5 375.719 121.079  16
  -1 -13   5 651.284 138.939  18
  -1 -13   5 422.861 96.1114  13
  -1 -13   4 1074.62 137.065  13
   1  13  -4 1168.97 174.627  16
  -1 -13   4 927.555 128.752  10
  -1 -13   4 1098.20 152.595  18
  -1 -13   3 12.4610 77.5918  13
  -1 -13   3 150.606 101.062  18
  -1 -13   3 191.711 79.9904  10
   1  13  -3 148.101 94.5179  16
  -1 -13   2 650.860 115.523  10
  -1 -13   2 751.622 141.519  18
   1  13  -2 625.789 146.003  16
  -1 -13   2 651.454 112.829  13
  -1 -13   1 3729.80 271.891  18
  -1 -13   1 3439.74 222.638  13
  -1 -13   1 3826.10 247.701  10
   1  13  -1 3983.38 278.813  16
  -1 -13   0 483.765 91.4191  13
  -1 -13   0 563.511 112.827  10
  -1 -13   0 544.022 122.461  18
   1  13   0 531.876 124.513  16
  -1 -13  -1 188.775 112.844  18
  -1 -13  -1 145.379 80.2373  13
  -1 -13  -1 27.6169 87.1053  10
   1  13   1 143.175 96.7294  16
   1  13   2-20.2179 94.4933  16
  -1 -13  -2 170.710 108.717  18
  -1 -13  -2 110.217 77.0171  19
  -1 -13  -2 40.3082 81.9930  10
  -1 -13  -2 81.4659 71.9681  13
   1  13   3 2607.73 216.443  16
  -1 -13  -3 2148.95 170.309  13
  -1 -13  -3 2409.85 205.727  10
  -1 -13  -3 2575.85 229.397  18
  -1 -13  -3 2405.18 203.738  19
  -1 -13  -4 1740.51 151.459  13
  -1 -13  -4 1884.09 182.708  10
  -1 -13  -4 1542.00 166.635  19
   1  13   4 1709.18 176.389  16
  -1 -13  -4 1887.20 199.695  18
  -1 -13  -5 399.532 101.280  10
  -1 -13  -5 407.731 127.147  18
  -1 -13  -5 360.435 90.2031  19
   1  13   5 373.687 96.8285  16
   1  13   6 5942.21 281.374  16
  -1 -13  -6 5725.09 291.287  19
  -1 -13  -6 6358.90 307.576  10
  -1 -13  -6 6814.23 357.312  18
  -1 -13  -7 293.229 103.293  18
   1  13   7 405.020 87.7642  16
  -1 -13  -7 351.287 84.3378  19
   1  13   7 263.187 84.0251  17
  -1 -13  -7 609.520 117.214  10
  -1 -13  -8 510.755 105.375  10
   1  13   8 642.058 92.2208  16
  -1 -13  -8 554.293 91.1476  19
  -1 -13  -8 536.609 88.7657  20
   1  13   8 342.971 76.1465  17
  -1 -13  -8 489.385 118.160  18
  -1 -13  -9 544.707 84.5298  19
   1  13   9 483.247 82.8996  17
  -1 -13  -9 395.540 81.4634  10
  -1 -13  -9 580.504 80.8754  20
  -1 -13  -9 679.577 123.835  18
  -1 -13 -10 449.361 75.3058  19
  -1 -13 -10 613.475 92.5007  10
   1  13  10 638.084 79.9038  17
  -1 -13 -10 727.539 114.721  18
   1  13  11 190.594 54.4091  17
  -1 -13 -11 260.211 76.4181  18
  -1 -13 -11 253.963 61.7271  10
   1  13  12 154.528 38.9219  17
  -1 -13 -12 117.957 42.5020  10
  -1 -13 -12 94.8794 58.7510  18
   1  14 -19 42.6374 43.2144  11
  -1 -14  19 81.9248 52.9815  13
  -1 -14  19 15.2453 42.8433  18
   1  14 -18 631.744 86.1380  11
  -1 -14  18 683.591 92.0126  13
  -1 -14  18 647.198 88.2644  18
   1  14 -17 461.006 87.7115  11
  -1 -14  17 216.688 74.1056  13
  -1 -14  17 320.740 88.3306  18
  -1 -14  16 747.473 114.962  18
   1  14 -16 806.268 110.030  11
  -1 -14  16 804.120 114.546  13
  -1 -14  15 21.0281 81.0510  18
   1  14 -15 51.8034 75.9605  11
  -1 -14  15 59.7058 80.2653  13
   1  14 -14 1233.90 138.083  11
  -1 -14  14 1066.47 145.142  18
  -1 -14  14 982.275 140.035  13
  -1 -14  13 183.176 93.2501  13
   1  14 -13 161.662 78.0066  11
  -1 -14  13 238.535 107.014  18
  -1 -14  12 473.212 115.569  18
   1  14 -12 483.216 112.790  11
  -1 -14  12 525.492 105.173  13
   1  14 -11 4447.91 247.041  11
   1  14 -11 4452.89 266.406  16
  -1 -14  11 4217.22 254.083  13
  -1 -14  11 4674.38 291.815  18
   1  14 -10 932.310 141.282  16
   1  14 -10 1007.61 120.610  11
  -1 -14  10 712.385 127.543  13
  -1 -14  10 959.873 149.506  18
  -1 -14   9 309.182 94.6156  13
   1  14  -9 293.778 83.9562  11
  -1 -14   9 284.122 100.900  18
   1  14  -9 523.970 130.705  16
   1  14  -8 3839.96 209.471  11
  -1 -14   8 3838.91 269.059  18
   1  14  -8 4113.97 289.840  16
  -1 -14   8 3946.42 245.635  13
   1  14  -7 7762.57 399.240  16
  -1 -14   7 7383.86 372.399  18
   1  14  -7 7682.78 292.362  11
  -1 -14   7 6743.87 321.306  13
  -1 -14   6 3613.17 228.710  10
  -1 -14   6 3455.44 261.388  18
   1  14  -6 3858.71 290.464  16
  -1 -14   6 3159.30 219.988  13
  -1 -14   5 2197.05 185.516  10
   1  14  -5 2205.72 222.628  16
  -1 -14   5 2266.36 187.779  13
  -1 -14   5 2335.57 215.533  18
  -1 -14   4 236.960 98.5985  18
  -1 -14   4 390.830 94.5709  13
  -1 -14   4 384.345 93.0860  10
   1  14  -4 250.798 112.964  16
  -1 -14   3-7.60967 78.0103  13
  -1 -14   3-108.878 81.8443  10
  -1 -14   3-150.151 99.4581  18
   1  14  -3 133.830 107.306  16
   1  14  -2 776.619 151.611  16
  -1 -14   2 716.788 120.699  10
  -1 -14   2 555.049 109.408  13
  -1 -14   2 925.111 154.796  18
  -1 -14   1 3612.51 263.722  18
  -1 -14   1 3470.78 226.198  10
   1  14  -1 3850.89 273.919  16
  -1 -14   1 3477.08 216.831  13
   1  14   0 5971.45 338.339  16
  -1 -14   0 5594.88 326.654  18
  -1 -14   0 5810.05 296.285  10
  -1 -14   0 5396.87 272.610  13
  -1 -14  -1 405.024 97.6287  19
   1  14   1 394.550 112.972  16
  -1 -14  -1 262.996 105.140  18
  -1 -14  -1 352.070 97.0987  10
  -1 -14  -1 442.604 80.9226  13
  -1 -14  -2 277.229 74.3327  13
   1  14   2 404.439 116.235  16
  -1 -14  -2 351.643 114.733  18
  -1 -14  -2 314.324 102.748  10
  -1 -14  -2 444.440 99.5872  19
  -1 -14  -3 226.904 72.4903  19
  -1 -14  -3 458.910 122.328  18
  -1 -14  -3 374.210 80.1213  13
   1  14   3 388.521 100.931  16
  -1 -14  -3 225.063 86.0628  10
   1  14   4 1524.85 159.704  16
  -1 -14  -4 1391.62 135.346  19
  -1 -14  -4 1575.48 185.489  18
  -1 -14  -4 1604.30 160.138  10
  -1 -14  -5 542.443 124.568  18
  -1 -14  -5 437.635 94.7575  10
   1  14   5 467.485 96.3993  16
  -1 -14  -5 493.857 92.8081  19
   1  14   6 1958.83 145.247  16
  -1 -14  -6 1958.51 158.311  10
  -1 -14  -6 1940.81 185.268  18
  -1 -14  -6 1788.42 142.198  19
  -1 -14  -7 102.126 81.2516  18
  -1 -14  -7 117.665 57.6410  19
  -1 -14  -7 3.85398 57.8943  10
   1  14   7 126.137 52.5978  16
  -1 -14  -7-87.9950 66.3458  20
  -1 -14  -8 4.80176 49.7565  10
   1  14   8 149.121 50.2237  16
  -1 -14  -8 3.52449 46.0396  20
  -1 -14  -8 14.6865 70.9258  18
  -1 -14  -9 29.9484 64.3640  18
  -1 -14  -9 108.625 54.8886  10
  -1 -14 -10 2047.11 110.317  10
  -1 -14 -10 2358.35 149.878  18
  -1 -14 -11 272.200 52.8158  18
  -1 -15  18 634.587 75.2371  13
  -1 -15  18 526.061 62.8261  18
   1  15 -18 747.394 72.6218  11
  -1 -15  17-33.1515 53.0643  13
   1  15 -17 82.3148 48.5102  11
  -1 -15  17 107.262 54.5189  18
  -1 -15  16 768.999 99.6198  13
   1  15 -16 645.569 86.4285  11
  -1 -15  16 605.540 92.5123  18
   1  15 -15 1509.66 124.763  11
  -1 -15  15 1409.55 136.114  18
  -1 -15  15 1544.16 134.648  13
   1  15 -14 109.864 59.8429  11
  -1 -15  14 52.3145 67.8893  13
  -1 -15  13 159.738 84.6014  18
  -1 -15  13 152.454 75.5540  13
   1  15 -13 213.107 71.0536  11
  -1 -15  12 164.272 77.6629  13
   1  15 -12 144.110 76.4801  11
  -1 -15  12 103.062 86.7222  18
  -1 -15  11 154.622 90.1658  13
  -1 -15  11 151.983 102.401  18
   1  15 -11 66.4899 64.7967  11
   1  15 -11-35.5386 62.7745  16
  -1 -15  10 96.5068 81.9440  13
   1  15 -10 79.6542 71.2717  16
  -1 -15  10 7.28845 78.5391  18
   1  15 -10 72.9546 62.0645  11
  -1 -15   9 49.1293 81.2748  18
   1  15  -9 73.0793 93.4282  16
  -1 -15   9-59.1237 75.0988  13
   1  15  -9 60.3196 64.6443  11
  -1 -15   8-36.5558 89.5929  18
  -1 -15   8 256.217 81.2433  10
   1  15  -8 278.950 102.474  16
  -1 -15   8 231.557 86.4127  13
   1  15  -8 139.831 59.5448  11
   1  15  -7 231.275 96.6241  16
  -1 -15   7 287.049 107.255  18
  -1 -15   7 326.835 87.2959  10
  -1 -15   7 407.100 96.8803  13
  -1 -15   6 3002.26 205.353  13
  -1 -15   6 3124.77 204.594  10
  -1 -15   6 3550.12 251.120  18
   1  15  -6 3458.41 257.108  16
  -1 -15   5 1035.70 151.778  18
  -1 -15   5 1123.08 134.361  10
   1  15  -5 1175.74 168.026  16
  -1 -15   5 1173.92 140.394  13
   1  15  -4 897.353 152.084  16
  -1 -15   4 891.925 118.573  10
  -1 -15   4 1055.19 154.288  18
  -1 -15   4 946.533 122.760  13
  -1 -15   3 31.3690 73.9356  10
  -1 -15   3-78.4888 78.3680  13
  -1 -15   3 4.57074 85.4664  18
   1  15  -3 146.778 92.9662  16
  -1 -15   2 156.975 70.9107  13
   1  15  -2 404.895 111.335  16
  -1 -15   2 258.814 81.6891  10
  -1 -15   2 270.392 106.129  18
  -1 -15   1 1952.55 194.278  18
  -1 -15   1 1521.99 143.805  19
  -1 -15   1 1610.64 151.262  10
   1  15  -1 1891.06 192.872  16
  -1 -15   1 1693.53 152.082  13
  -1 -15   0 3975.63 265.558  18
  -1 -15   0 3643.78 212.993  10
   1  15   0 4151.40 263.516  16
  -1 -15   0 3753.81 203.593  13
   1  15   1 1375.73 161.756  16
  -1 -15  -1 1145.26 128.381  10
  -1 -15  -1 1352.20 128.335  13
  -1 -15  -1 1164.91 157.503  18
  -1 -15  -2 504.781 93.9426  10
  -1 -15  -2 513.642 119.026  18
   1  15   2 620.779 119.765  16
  -1 -15  -3 2731.56 177.288  10
   1  15   3 2964.54 192.799  16
  -1 -15  -3 2879.58 217.628  18
  -1 -15  -4-7.89131 54.8689  10
   1  15   4-3.85299 59.5818  16
   1  15   5 23.3092 49.4324  16
  -1 -15  -5 0.72725 52.4391  10
  -1 -15  -5 3.13510 76.9749  18
  -1 -15  -6 544.705 100.084  18
  -1 -15  -6 509.998 72.4286  10
   1  15   6 741.485 80.7883  16
  -1 -15  -6 539.418 78.0358  20
  -1 -15  -7 100.731 65.3352  18
  -1 -15  -7 95.7054 40.8015  10
  -1 -15  -7-10.8847 38.7718  20
   1  15   7 4.87217 34.1551  16
  -1 -15  -8 477.037 78.2937  18
  -1 -16  16 12.3689 36.0060  13
  -1 -16  16 7.25947 39.2072  18
   1  16 -16 25.1737 34.4294  11
  -1 -16  15 701.021 81.8702  13
   1  16 -15 692.681 72.6775  11
  -1 -16  15 539.376 74.2975  18
  -1 -16  14 343.689 70.0885  13
  -1 -16  14 476.098 77.4974  18
   1  16 -14 400.033 61.7995  11
   1  16 -13 247.784 59.3429  11
  -1 -16  13 167.416 60.7487  13
  -1 -16  13 321.177 77.9802  18
   1  16 -12-67.1379 50.0054  11
  -1 -16  12 134.111 68.1803  18
  -1 -16  12 70.6140 61.8008  13
  -1 -16  11 2179.17 170.559  18
  -1 -16  11 2404.35 157.405  13
   1  16 -11 2352.00 134.940  11
   1  16 -11 1960.70 135.360  16
   1  16 -10 361.989 65.1359  11
  -1 -16  10 370.278 84.5114  13
   1  16 -10 310.310 83.2268  16
  -1 -16  10 227.437 74.2908  18
  -1 -16   9 30.6003 61.2584  13
   1  16  -9 91.8431 67.5191  16
  -1 -16   9 80.4476 70.7688  18
  -1 -16   8 547.572 92.6431  13
  -1 -16   8 649.751 113.156  18
   1  16  -8 502.347 93.3070  16
  -1 -16   7 1638.38 160.168  18
  -1 -16   7 1720.18 141.268  13
   1  16  -7 1771.54 169.511  16
  -1 -16   6 470.429 84.7011  13
   1  16  -6 387.901 105.293  16
  -1 -16   6 250.051 89.0757  18
  -1 -16   5 115.931 77.6945  18
  -1 -16   5 80.9438 64.2917  13
   1  16  -5 80.7592 79.8104  16
  -1 -16   4 31.3220 55.4107  13
   1  16  -4 127.674 90.3782  16
  -1 -16   4 169.857 88.2399  18
  -1 -16   3 1197.47 117.270  10
  -1 -16   3 1398.60 123.284  13
   1  16  -3 1616.07 164.884  16
  -1 -16   3 1553.86 159.550  18
  -1 -16   2-74.7770 63.8566  13
  -1 -16   2-61.6390 56.1193  10
  -1 -16   2-25.6632 74.3472  18
   1  16  -2 36.8207 80.4915  16
  -1 -16   1 7427.28 269.665  10
  -1 -16   1 7144.72 260.376  13
  -1 -16   1 8415.45 347.463  18
   1  16  -1 8263.43 337.758  16
  -1 -16   0 4751.41 264.353  18
   1  16   0 4713.83 244.737  16
   1  16   1 103.544 64.4327  16
  -1 -16  -1 17.6159 77.4562  18
  -1 -16  -1-59.8379 56.6972  10
  -1 -16  -2 667.810 109.410  18
   1  16   2 459.090 87.8065  16
   1  16   3-9.27359 51.3721  16
  -1 -16  -3-18.9490 60.2615  18
   1  16   4 1170.53 96.4155  16
  -1 -16  -4 1374.86 129.733  18
   1  16   5 3062.97 132.919  16
  -1 -16  -5 3148.93 173.734  18
  -1 -16  -5 3028.11 138.403  20
  -1 -16  -6 582.939 77.2121  18
  -1 -16  -6 594.059 53.7341  20
   1  17 -13 69.8769 31.5563   7
  -1 -17  13 54.1874 37.2387  13
  -1 -17  12 1080.53 87.0655  13
  -1 -17  12 992.650 92.9607  18
   1  17 -12 1055.40 65.8255   7
  -1 -17  11 274.312 58.7031  13
   1  17 -11 374.574 43.7999   7
  -1 -17  11 264.624 65.5688  18
  -1 -17  10 271.370 56.6710  13
   1  17 -10 173.495 47.6174  16
  -1 -17  10 219.427 65.6049  18
  -1 -17   9 710.694 95.5652  18
   1  17  -9 607.917 80.2984  16
  -1 -17   9 697.528 79.6140  13
   1  17  -8 1.56232 51.4374  16
  -1 -17   8-25.7755 58.9848  18
  -1 -17   8-48.8772 50.5780  13
  -1 -17   7 1504.92 133.457  18
   1  17  -7 1444.49 130.491  16
  -1 -17   7 1306.23 105.837  13
   1  17  -6 276.681 77.0971  16
  -1 -17   6 213.816 70.5548  18
  -1 -17   6 147.928 53.3859  13
  -1 -17   5 206.305 53.8235  13
   1  17  -5 133.633 69.7735  16
  -1 -17   5 213.547 70.5679  18
   1  17  -4 80.0101 66.3165  16
  -1 -17   4 25.6233 62.7933  18
  -1 -17   4 99.0131 46.5593  13
  -1 -17   3 1890.46 152.321  18
   1  17  -3 1924.64 149.162  16
  -1 -17   3 1706.16 107.239  13
   1  17  -2 1752.62 137.464  16
  -1 -17   2 1324.55 129.628  18
   1  17  -1-38.3403 56.9675  16
  -1 -17   1-73.7016 62.4752  18
   1  17   0 671.171 85.2483  16
  -1 -17   0 836.199 98.2564  18
   1  17   1 52.5348 45.7568  16
  -1 -17  -1 12.8388 51.8220  18
  -1 -17  -2 75.0887 51.0366  18
   1  17   2 181.192 49.6035  16
  -1 -17  -3 82.6691 43.3334  18
   1  17   3 121.944 36.8470  16
  -1 -17  -3 101.321 38.4185  20
  -1 -18   8 47.5948 39.9219  18
   1  18  -8 10.9573 30.7934  16
   1  18  -7 410.790 56.3593  16
  -1 -18   7 355.688 62.1740  18
  -1 -18   6 380.041 60.4349  18
   1  18  -6 276.104 53.6403  16
   1  18  -5 106.613 43.3691  16
  -1 -18   5 193.008 50.3375  18
   1  18  -4 447.653 63.4857  16
  -1 -18   4 468.725 67.0363  18
   1  18  -3 43.1806 35.9496  16
  -1 -18   3-62.1990 42.4684  18
  -2  19  -1 24.2405 35.5461  16
   2 -19   1 13.5958 33.5877  13
  -2  19  -2 283.926 57.4707  16
   2 -19   2 217.178 50.2041  13
   2 -19   2 212.486 48.1997  19
  -2  19  -3 75.9869 44.4020  16
   2 -19   3 27.3452 39.6637  13
   2 -19   3 21.5213 35.4695  19
   2 -19   4 253.457 50.5066  19
   2 -19   4 297.173 55.4649  13
  -2  19  -4 302.635 60.5269  16
   2 -19   5 0.47933 34.4986  19
   2 -19   5 53.5894 40.5384  13
  -2  19  -5 2.00386 39.6884  16
  -2  19  -6 44.0064 42.6136  16
   2 -19   6 53.5514 42.7717  13
   2 -19   7 322.451 59.9214  13
  -2  19  -7 345.042 58.2388  16
   2 -19   8 12.7986 38.5208  13
  -2  19  -8 15.2362 36.4285  16
   2 -18  -4 275.526 51.0959  19
   2 -18  -4 417.022 56.4894  18
   2 -18  -4 397.881 61.2592  20
  -2  18   3 66.0771 37.5108  16
   2 -18  -3-25.4736 41.3763  19
   2 -18  -3 86.1240 49.5162  20
   2 -18  -3-6.70668 40.7118  18
   2 -18  -2 419.382 67.3008  13
   2 -18  -2 335.526 59.3868  18
  -2  18   2 351.493 59.5877  16
   2 -18  -1 199.708 57.0239  18
  -2  18   1 377.598 68.8786  16
   2 -18  -1 218.156 60.4547  19
   2 -18  -1 289.191 63.5500  13
   2 -18   0 524.971 80.6763  18
  -2  18   0 507.427 84.4033  16
   2 -18   0 532.994 86.8783  19
   2 -18   0 529.222 87.9492  13
   2 -18   1 244.769 72.0640  13
   2 -18   1 237.576 63.5458  18
  -2  18  -1 246.520 72.6222  16
   2 -18   1 326.041 77.3024  19
   2 -18   2 99.5297 55.4332  18
  -2  18  -2 62.3801 68.4330  16
   2 -18   2 116.788 67.0846  13
   2 -18   3 445.096 76.9031  18
  -2  18  -3 591.300 102.735  16
   2 -18   3 417.374 82.0155  13
  -2  18  -4 2.46898 61.8898  16
   2 -18   4-3.14620 48.8420  18
   2 -18   4-44.6286 65.6223  13
   2 -18   5 55.1157 53.5138  18
  -2  18  -5 90.8409 69.1444  16
   2 -18   5 102.373 65.1582  13
   2 -18   6 139.173 57.7934  18
  -2  18  -6 226.325 77.6839  16
   2 -18   6 187.559 68.7854  13
   2 -18   7 63.6174 61.9133  13
  -2  18  -7 133.958 69.1480  16
   2 -18   7-20.4947 51.2786  18
   2 -18   8 710.745 97.4107  13
  -2  18  -8 617.773 96.1284  16
  -2  18  -9 786.415 97.4476  16
   2 -18   9 858.459 101.586  13
  -2  18 -10 623.869 78.5903  16
   2 -18  10 662.409 87.8794  13
  -2  18 -11 545.979 63.7890  16
   2 -18  11 842.212 92.2418  13
   2 -18  12 217.746 58.2050  13
   2 -17  -7 447.441 65.3726  20
   2 -17  -7 478.278 65.4618  18
   2 -17  -7 354.701 57.5309  19
   2 -17  -6 254.783 60.3553  18
   2 -17  -6 223.233 58.1823  20
   2 -17  -6 236.504 62.8485  19
   2 -17  -5 893.212 99.2335  18
   2 -17  -5 775.551 96.4818  19
   2 -17  -5 947.550 106.799  20
  -2  17   5 591.520 66.1874  16
  -2  17   4 283.241 65.7109  16
   2 -17  -4 147.722 67.1842  18
   2 -17  -4 221.165 78.7670  19
   2 -17  -3 2947.85 195.406  19
   2 -17  -3 2665.64 169.976  13
  -2  17   3 2713.35 167.084  16
   2 -17  -3 2912.14 183.907  18
  -2  17   2 456.355 91.2082  16
   2 -17  -2 517.018 96.9333  18
   2 -17  -2 514.777 97.8796  19
   2 -17  -2 450.883 100.859  13
  -2  17   1 2296.18 183.630  16
   2 -17  -1 2594.29 180.723  18
   2 -17  -1 2430.40 191.030  19
   2 -17  -1 2975.27 190.756  13
  -2  17   0 821.989 124.248  16
   2 -17   0 1077.40 124.118  18
   2 -17   0 1076.27 129.451  13
   2 -17   1 6.68821 60.4087  18
   2 -17   1 47.0931 71.4895  13
  -2  17  -1-8.26104 79.7311  16
   2 -17   2 902.811 115.900  18
  -2  17  -2 1142.28 147.179  16
   2 -17   2 1131.00 135.611  13
  -2  17  -3 693.295 124.356  16
   2 -17   3 753.117 109.373  18
   2 -17   3 779.207 117.740  13
   2 -17   4 15.2581 75.9366  13
  -2  17  -4-7.18401 91.6822  16
   2 -17   4 88.0069 65.7428  18
   2 -17   5 885.263 126.465  13
   2 -17   5 680.771 105.437  18
  -2  17  -5 693.737 138.751  16
   2 -17   6 248.415 93.6513  13
   2 -17   6 251.177 78.7696  18
  -2  17  -6 338.595 112.622  16
   2 -17   7 550.867 107.024  13
   2 -17   7 405.092 88.8854  18
  -2  17  -7 453.682 115.231  16
   2 -17   8 244.352 77.4702  18
   2 -17   8 239.562 79.3448  13
  -2  17  -8-1.92333 77.8252  16
   2 -17   9 47.2325 70.5685  13
   2 -17   9-25.3304 48.7735  18
  -2  17  -9 148.802 78.7131  16
  -2  17 -10 494.274 99.1403  16
   2 -17  10 349.270 85.0737  13
   2 -17  10 576.270 81.9354  18
   2 -17  11 790.980 112.661  13
  -2  17 -11 776.392 72.5451  11
  -2  17 -11 721.783 102.383  16
  -2  17 -12 645.471 68.3269  11
  -2  17 -12 531.496 79.3006  16
   2 -17  12 797.542 103.760  13
   2 -17  13 337.700 73.7870  13
  -2  17 -13 262.584 50.4702  11
  -2  17 -14 65.5474 36.5328  11
   2 -17  14-46.1109 50.5707  13
   2 -17  15 457.539 67.6934  13
  -2  17 -15 373.065 45.1338  11
   2 -16 -10 1458.80 99.1413  18
   2 -16 -10 1373.90 85.7739  20
   2 -16 -10 1467.73 97.3546  19
  -2  16   9-49.1275 37.7423  17
   2 -16  -9-35.1443 44.8338  20
   2 -16  -9-73.1051 52.2050  18
   2 -16  -9-47.3985 51.4906  19
   2 -16  -8 1086.45 111.661  18
  -2  16   8 864.964 82.5856  17
   2 -16  -8 1195.16 113.072  20
   2 -16  -8 1192.77 116.109  19
   2 -16  -7 1976.74 156.530  18
   2 -16  -7 1891.86 154.862  19
   2 -16  -7 1902.20 142.828  20
  -2  16   6 248.026 61.8351  16
   2 -16  -6 334.715 90.2055  18
   2 -16  -6 237.008 80.2032  19
   2 -16  -6 241.865 78.5737  20
   2 -16  -5 116.671 76.2127  19
  -2  16   5 35.5095 53.0764  16
   2 -16  -5-11.6845 72.3646  13
   2 -16  -5-48.2915 71.3805  18
   2 -16  -4 869.150 130.513  19
  -2  16   4 921.656 112.057  16
   2 -16  -4 947.051 130.506  18
   2 -16  -4 1071.46 129.003  13
  -2  16   3 1914.43 167.090  16
   2 -16  -3 1964.73 175.292  18
   2 -16  -3 1968.13 194.117  19
   2 -16  -3 2083.64 179.588  13
   2 -16  -2 211.629 95.7851  13
  -2  16   2 98.0708 82.6251  16
   2 -16  -2 217.026 94.2608  18
  -2  16   1 4618.51 283.755  16
   2 -16  -1 4548.46 270.162  18
   2 -16  -1 4593.37 267.161  13
   2 -16   0 3214.70 228.092  13
  -2  16   0 3273.87 252.147  16
   2 -16   0 3454.63 234.554  18
   2 -16   1 439.132 104.470  13
   2 -16   1 344.432 100.697  18
  -2  16  -1 386.757 116.955  16
  -2  16  -2 775.590 149.099  16
   2 -16   2 895.228 140.023  13
   2 -16   2 1031.33 144.633  18
  -2  16  -3 761.815 150.880  16
   2 -16   3 966.310 134.198  18
   2 -16   3 937.554 138.854  13
   2 -16   4 1045.51 141.416  18
   2 -16   4 1286.42 156.895  13
  -2  16  -4 1115.78 172.497  16
   2 -16   5-30.8380 88.0148  13
   2 -16   5-92.7461 81.4011  18
  -2  16  -5 81.9108 109.933  16
   2 -16   6 1282.45 147.544  18
  -2  16  -6 1592.79 213.366  16
   2 -16   6 1611.03 170.234  13
  -2  16  -7 3875.63 292.929  16
   2 -16   7 3741.95 236.819  18
   2 -16   7 3926.55 252.301  13
   2 -16   8 590.408 103.484  18
  -2  16  -8 449.725 127.054  16
   2 -16   8 722.930 126.046  13
  -2  16  -9 32.8585 88.3346  16
   2 -16   9-48.5373 66.5501  18
   2 -16   9 68.0628 88.3833  13
  -2  16  -9 141.284 53.7652  11
   2 -16  10 447.510 89.3688  18
  -2  16 -10 504.487 79.5640  11
   2 -16  10 522.492 113.122  13
  -2  16 -10 525.052 117.493  16
  -2  16 -11 1399.95 115.350  11
   2 -16  11 1084.38 113.244  18
  -2  16 -11 1173.44 151.998  16
   2 -16  11 1478.54 160.849  13
   2 -16  12 85.5317 50.1666  18
  -2  16 -12 27.1161 60.9077  16
  -2  16 -12 10.2776 52.1637  11
  -2  16 -13 193.725 60.7419  11
  -2  16 -13 78.8207 52.4680  16
  -2  16 -14 63.4248 47.9027  11
   2 -16  14 180.809 70.8392  13
   2 -16  15 298.459 77.0252  13
  -2  16 -15 239.075 59.7684  11
  -2  16 -16 32.8251 42.5325  11
   2 -16  16-66.9482 54.1588  13
  -2  16 -17-13.6443 35.1051  11
   2 -16  17 122.373 46.0622  13
  -2  15  12 367.880 50.9439  17
   2 -15 -12 490.180 50.6091  20
   2 -15 -12 576.755 70.3362  19
   2 -15 -11 77.1679 50.8585  19
  -2  15  11-37.3792 42.2585  17
   2 -15 -11 123.371 48.3042  20
   2 -15 -11-45.2540 48.7001  18
   2 -15 -10 2442.76 167.501  18
   2 -15 -10 2434.18 165.882  19
  -2  15  10 2186.06 147.957  17
   2 -15 -10 2596.50 153.387  20
   2 -15  -9 7372.76 304.466  18
   2 -15  -9 6768.89 293.408  19
   2 -15  -9 6545.57 270.129  20
   2 -15  -8 1040.28 135.237  19
   2 -15  -8 1058.08 125.523  20
   2 -15  -8 1054.28 137.521  18
  -2  15   7 10.5821 50.8136  16
   2 -15  -7 2.04464 73.0454  19
   2 -15  -7 115.943 90.4323  18
  -2  15   6 424.365 79.9417  16
   2 -15  -6 402.814 81.7400  15
   2 -15  -6 377.462 103.672  19
   2 -15  -6 295.327 98.1256  13
   2 -15  -6 377.571 108.369  18
   2 -15  -5 493.035 125.089  19
   2 -15  -5 609.471 85.6730  15
  -2  15   5 471.150 103.174  16
   2 -15  -5 737.387 132.283  18
   2 -15  -5 681.211 118.243  13
   2 -15  -4 323.194 103.849  13
  -2  15   4 362.714 100.758  16
   2 -15  -4 175.691 94.0975  18
   2 -15  -4 188.552 67.0415  15
   2 -15  -4 386.596 131.248  19
  -2  15   3 191.094 103.492  16
   2 -15  -3 15.1169 85.6595  18
   2 -15  -3 77.3569 85.1526  13
   2 -15  -2 583.607 121.536  13
  -2  15   2 695.678 136.784  16
   2 -15  -2 848.011 145.504  18
   2 -15  -1 3614.58 249.448  13
  -2  15   1 3554.11 264.424  16
   2 -15  -1 3407.75 248.129  18
   2 -15   0 4598.60 281.341  18
   2 -15   0 4149.71 226.199   9
  -2  15   0 4167.71 298.621  16
   2 -15   0 4062.49 273.059  13
  -2  15  -1 1424.50 189.567  16
   2 -15   1 1425.84 137.436   9
   2 -15   1 1538.37 176.526  13
   2 -15   1 1514.97 174.084  18
   2 -15   2 291.788 91.5521  18
  -2  15  -2 284.513 124.824  16
   2 -15   2 268.804 80.8754   9
   2 -15   2 374.992 114.112  13
  -2  15  -3 312.822 134.977  16
   2 -15   3 176.412 98.9100  18
   2 -15   3 294.159 113.948  13
   2 -15   4 378.778 105.325  18
  -2  15  -4 485.969 136.689  16
   2 -15   4 593.690 127.337  13
  -2  15  -5 652.896 152.419  16
   2 -15   5 677.632 126.528  18
   2 -15   5 839.343 140.339  13
  -2  15  -6 928.786 178.433  16
   2 -15   6 691.136 123.548  18
   2 -15   6 728.567 140.052  13
  -2  15  -7-51.6713 110.469  16
   2 -15   7-154.533 95.6426  18
   2 -15   7 104.908 91.2513  13
  -2  15  -8 3168.31 277.868  16
   2 -15   8 2995.13 218.919  18
  -2  15  -8 3166.45 184.627  11
   2 -15   8 3278.16 240.298  13
  -2  15  -9 1989.20 218.403  16
   2 -15   9 1923.46 178.586  18
  -2  15  -9 1626.17 142.632  11
   2 -15   9 1959.30 196.276  13
  -2  15 -10 80.2048 72.8661  11
   2 -15  10-93.7599 96.2587  13
   2 -15  10-84.6425 75.2661  18
  -2  15 -10-168.582 112.380  16
   2 -15  11 475.415 96.4534  18
  -2  15 -11 333.580 85.6956  11
  -2  15 -11 460.929 122.973  16
   2 -15  11 380.777 113.358  13
   2 -15  12-57.3473 84.7995  13
  -2  15 -12 152.385 84.9095  11
  -2  15 -12 67.0829 83.2059  16
   2 -15  12 5.57108 62.9408  18
  -2  15 -13 240.891 81.0097  11
   2 -15  13 242.552 73.9608  18
   2 -15  13 215.558 98.5576  13
  -2  15 -13 319.623 88.2148  16
  -2  15 -14 103.581 70.7620  11
   2 -15  14 13.8577 49.3888  18
   2 -15  14 41.3070 76.4202  13
  -2  15 -15 438.404 85.7215  11
   2 -15  15 633.558 111.246  13
  -2  15 -16 855.993 101.736  11
   2 -15  16 786.282 105.071  13
   2 -15  17 136.939 66.2451  13
  -2  15 -17 272.493 65.7055  11
   2 -15  18 121.822 52.3893  13
  -2  15 -18 56.3664 45.1872  11
  -2  14  14 165.857 42.5091  17
   2 -14 -14 215.352 48.4143  19
   2 -14 -13 1598.61 93.9957  20
  -2  14  13 1639.45 113.248  17
   2 -14 -13 1612.18 119.952  19
   2 -14 -13 1894.01 135.726  18
   2 -14 -12 737.444 101.773  18
   2 -14 -12 834.029 88.1966  20
  -2  14  12 728.040 98.3298  17
   2 -14 -12 711.051 102.351  19
   2 -14 -11 2828.75 166.924  20
   2 -14 -11 2902.07 198.372  18
   2 -14 -11 2959.37 198.128  19
   2 -14 -10 201.474 90.3878  18
   2 -14 -10 9.49494 65.4379  20
   2 -14 -10 28.9831 77.7695  19
   2 -14  -9 5953.83 308.526  18
   2 -14  -9 5423.21 276.180  20
   2 -14  -9 5373.12 303.712  19
   2 -14  -9 5833.43 240.418  15
   2 -14  -8 370.193 105.516  18
   2 -14  -8 176.339 95.4803  19
   2 -14  -8 207.632 75.4220  15
   2 -14  -7 1042.91 141.065  13
   2 -14  -7 1175.91 167.535  19
   2 -14  -7 1094.29 156.436  18
  -2  14   7 1129.20 118.117  16
   2 -14  -7 1076.96 119.256  15
   2 -14  -6 1402.87 164.251  13
   2 -14  -6 1289.72 166.554  18
  -2  14   6 1115.74 133.528  16
   2 -14  -6 1248.36 123.576  15
   2 -14  -6 1246.59 176.854  19
   2 -14  -5 152.723 101.992  19
  -2  14   5 114.089 74.6139  16
   2 -14  -5 39.1632 65.9436  15
   2 -14  -5 86.1994 88.8939  18
   2 -14  -5 93.6258 91.5771  13
   2 -14  -4 328.930 80.7492  15
   2 -14  -4 184.397 88.1659   9
   2 -14  -4 80.5154 84.6039  13
  -2  14   4 234.170 98.7260  16
   2 -14  -4 144.410 85.4228  18
   2 -14  -3 412.284 124.815  13
   2 -14  -3 386.420 80.0306  15
  -2  14   3 314.999 117.182  16
   2 -14  -3 509.792 106.362   9
   2 -14  -3 464.992 122.142  18
  -2  14   2 19.7392 85.8402  16
   2 -14  -2 140.779 76.9763   9
   2 -14  -2-38.9322 85.0120  13
   2 -14  -2 103.649 95.3981  18
   2 -14  -1 186.907 92.7774  13
   2 -14  -1 300.583 108.940  18
   2 -14  -1 351.165 92.0015   9
  -2  14   1 229.017 116.161  16
   2 -14   0 9427.22 398.249  13
   2 -14   0 9775.11 419.665  18
   2 -14   0 9394.34 344.701   9
  -2  14   0 9875.56 462.777  16
   2 -14   1 3383.46 201.543   9
  -2  14  -1 3577.45 287.243  16
   2 -14   1 3224.98 235.295  18
   2 -14   1 3027.58 231.898  13
   2 -14   2 8070.40 376.705  18
  -2  14  -2 9203.77 453.397  16
   2 -14   2 8983.99 319.963   9
   2 -14   2 9007.87 386.618  13
  -2  14  -3 4184.55 327.941  16
   2 -14   3 4001.35 207.104   9
   2 -14   3 4183.44 268.915  13
   2 -14   3 4037.66 258.496  18
   2 -14   4 260.123 75.4816   9
  -2  14  -4 251.478 119.221  16
   2 -14   4 211.583 95.3334  13
   2 -14   4 291.978 100.563  18
  -2  14  -5 4313.49 334.551  16
   2 -14   5 4185.76 267.956  13
   2 -14   5 3735.54 253.701  18
   2 -14   6 4505.05 281.269  13
  -2  14  -6 5302.48 369.578  16
   2 -14   6 4623.24 275.418  18
  -2  14  -7 6057.77 390.423  16
   2 -14   7 5285.22 297.586  18
  -2  14  -7 5881.71 257.653  11
   2 -14   7 5975.41 321.884  13
   2 -14   8 6001.80 322.478  13
   2 -14   8 6601.68 325.239  18
  -2  14  -8 6406.93 285.289  11
  -2  14  -8 6704.20 402.755  16
  -2  14  -9 2751.75 268.151  16
   2 -14   9 2590.63 208.466  18
   2 -14   9 2858.72 230.989  13
  -2  14  -9 3254.72 211.136  11
  -2  14 -10 2239.62 243.103  16
  -2  14 -10 2286.40 185.664  11
   2 -14  10 1950.18 178.843  18
   2 -14  10 1958.27 202.060  13
  -2  14 -11 448.367 129.487  16
   2 -14  11 408.535 114.275  13
  -2  14 -11 476.992 101.895  11
   2 -14  11 631.605 115.818  18
   2 -14  12 1744.79 183.808  13
  -2  14 -12 1886.14 182.435  11
   2 -14  12 1709.82 169.695  18
  -2  14 -12 1734.11 194.765  16
   2 -14  13 217.706 96.2271  13
  -2  14 -13 422.298 106.137  16
  -2  14 -13 384.028 105.869  11
   2 -14  13 122.011 70.4167  18
   2 -14  14 2376.90 181.118  18
  -2  14 -14 2904.10 208.775  11
   2 -14  14 2562.57 214.853  13
  -2  14 -15 1774.43 161.536  11
   2 -14  15 1498.62 162.205  13
   2 -14  15 1593.09 143.573  18
  -2  14 -16 106.277 85.1046  11
   2 -14  16 236.845 88.2546  13
   2 -14  17 520.133 93.4416  13
  -2  14 -17 408.166 86.4771  11
  -2  14 -18 216.494 63.8983  11
   2 -14  18 143.574 63.0224  13
  -2  14 -19 257.805 59.3736  11
   2 -14  19 223.393 58.8025  13
   2 -13 -15 20.4614 42.6431  19
  -2  13  15 73.5436 42.8023  17
  -2  13  14 2390.14 152.591  17
   2 -13 -14 2329.43 155.898  19
   2 -13 -14 2328.87 117.446  20
  -2  13  13 248.477 81.1245  17
   2 -13 -13 249.806 63.5923  20
   2 -13 -13 419.818 98.5963  18
   2 -13 -13 377.317 93.4566  19
   2 -13 -12 1155.91 145.388  18
   2 -13 -12 1036.67 112.704  20
   2 -13 -12 933.294 131.163  19
   2 -13 -11 1757.91 182.829  18
   2 -13 -11 1676.94 153.155  20
   2 -13 -11 1524.32 174.051  19
   2 -13 -11 1651.38 140.343  15
   2 -13 -10 3155.28 240.988  19
   2 -13 -10 3068.88 212.105  20
   2 -13 -10 3076.85 187.850  15
   2 -13 -10 3132.26 239.467  18
   2 -13  -9 898.164 132.099  20
   2 -13  -9 1049.93 165.760  19
   2 -13  -9 978.370 150.378  18
   2 -13  -9 984.606 123.135  15
   2 -13  -8 3771.36 279.954  19
   2 -13  -8 3866.04 278.416  18
   2 -13  -8 4025.25 253.053  13
   2 -13  -8 3650.73 212.057  15
  -2  13   7 175.394 77.4401  16
   2 -13  -7 15.3815 74.2137   9
   2 -13  -7 184.758 80.7857  15
   2 -13  -7 10.6938 88.2509  19
   2 -13  -7 112.780 87.3050  18
   2 -13  -7 220.200 85.3830  13
   2 -13  -6 210.889 98.1719  13
   2 -13  -6-20.5161 100.927  18
   2 -13  -6 141.240 79.8928   9
  -2  13   6 171.447 95.0462  16
   2 -13  -6-46.5835 95.2430  19
   2 -13  -6 26.4221 67.0949  15
   2 -13  -5 999.576 117.815  15
   2 -13  -5 986.507 147.797  13
  -2  13   5 1115.61 148.258  16
   2 -13  -5 1050.50 159.484  18
   2 -13  -5 1114.86 129.535   9
   2 -13  -4 1062.84 140.033  13
   2 -13  -4 1037.15 127.141   9
   2 -13  -4 1180.44 119.515  15
  -2  13   4 1005.65 148.815  16
   2 -13  -4 1279.85 172.515  18
   2 -13  -3 343.336 99.6579  13
   2 -13  -3 387.548 124.621  18
   2 -13  -3 306.025 80.0326  15
  -2  13   3 350.806 113.250  16
   2 -13  -3 375.123 98.6607   9
   2 -13  -2 1868.37 188.046  18
  -2  13   2 1607.88 189.235  16
   2 -13  -2 1446.19 141.044   9
   2 -13  -2 1796.07 175.231  13
  -2  13   1 742.545 155.349  16
  -2  13   1 1033.68 311.159   5
   2 -13  -1 755.193 135.826  18
   2 -13  -1 917.070 120.652   9
   2 -13  -1 651.601 121.945  13
  -2  13   1 417.789 155.592   2
  -2  13   0 8885.62 660.479   2
   2 -13   0 9368.87 337.002   9
  -2  13   0 9037.13 439.624  16
  -2  13   0 8417.59 786.838   5
   2 -13   0 10072.8 410.401  18
   2 -13   0 9745.02 393.644  13
  -2  13  -1 533.420 331.564   5
  -2  13  -1 305.281 135.836   2
   2 -13   1 864.900 111.505   9
  -2  13  -1 820.569 158.767  16
   2 -13   1 976.519 136.913  13
   2 -13   1 894.145 134.413  18
  -2  13  -2-0.32481 105.659  16
   2 -13   2 79.7854 83.6377  18
   2 -13   2 130.336 71.6506   9
  -2  13  -2 190.230 130.042   2
  -2  13  -2-114.006 262.966   5
   2 -13   2 50.2650 86.5685  13
  -2  13  -3 1906.40 341.796   2
  -2  13  -3 1797.80 223.151  16
   2 -13   3 1903.53 144.676   9
   2 -13   3 1713.25 172.143  18
   2 -13   3 2191.85 195.434  13
   2 -13   3 1554.41 246.546  21
   2 -13   4 1114.08 239.811  21
  -2  13  -4 770.663 168.818  16
   2 -13   4 1093.87 143.084  18
   2 -13   4 905.870 143.094  13
   2 -13   4 1135.05 113.074   9
  -2  13  -4 981.651 242.578   2
   2 -13   5 622.905 111.741  18
  -2  13  -5 632.245 172.462   2
  -2  13  -5 417.617 133.110  16
   2 -13   5 935.711 144.535  13
   2 -13   5 750.711 220.600  21
  -2  13  -6 1252.32 243.328   2
   2 -13   6 1938.57 181.917  18
  -2  13  -6 1772.78 232.618  16
   2 -13   6 1638.68 291.492  21
   2 -13   6 1747.94 180.891  13
   2 -13   7 23604.8 658.376  18
   2 -13   7 22858.3 659.372  13
  -2  13  -7 24622.9 804.877  16
  -2  13  -7 23996.2 600.175  11
  -2  13  -8 235.008 120.664  16
   2 -13   8 354.191 97.3237  13
   2 -13   8 44.9227 83.4191  18
  -2  13  -8 332.048 101.934  11
   2 -13   9 1469.14 168.352  13
   2 -13   9 1786.26 175.320  18
  -2  13  -9 1549.79 209.854  16
  -2  13  -9 1469.22 156.224  11
   2 -13  10 1068.69 143.766  18
  -2  13 -10 1065.83 184.934  16
  -2  13 -10 1047.95 148.137  11
   2 -13  10 786.779 141.407  13
  -2  13 -11 7817.35 365.346  11
   2 -13  11 7027.38 342.843  18
  -2  13 -11 7550.60 414.061  16
   2 -13  11 7697.75 371.349  13
  -2  13 -12 125.020 91.8024  11
   2 -13  12-18.6481 79.5846  18
  -2  13 -12-99.7893 101.735  16
   2 -13  12 14.5142 91.1926  13
  -2  13 -13 22.0930 84.8999  11
   2 -13  13 6.39962 88.1079  13
   2 -13  13 96.5732 74.7369  18
  -2  13 -13 79.2792 75.5620  14
   2 -13  14 770.130 139.072  13
  -2  13 -14 774.150 135.785  11
   2 -13  14 832.577 122.165  18
  -2  13 -14 585.631 97.1648  14
   2 -13  15 1489.61 145.232  18
  -2  13 -15 1801.09 177.802  11
  -2  13 -15 1285.87 134.836  14
   2 -13  15 1820.11 188.676  13
   2 -13  16 146.184 93.6024  13
  -2  13 -16 43.5214 62.4619  14
  -2  13 -16 6.13598 82.7568  11
   2 -13  16-165.674 79.6280  18
  -2  13 -17 4678.06 248.436  11
   2 -13  17 4409.67 243.105  13
   2 -13  17 4165.68 213.243  18
  -2  13 -18 2882.27 179.761  11
   2 -13  18 2735.20 185.133  13
  -2  13 -19 739.990 98.9905  11
   2 -13  19 924.512 103.544  13
   2 -13  20 649.897 77.7766  13
  -2  13 -20 675.303 76.3142  11
  -2  12  17 3327.94 142.677  17
   2 -12 -17 3448.69 150.307  19
   2 -12 -16 159.334 58.9377  19
  -2  12  16 21.5073 47.2050  17
   2 -12 -15 134.560 68.0371  19
   2 -12 -15 204.524 51.8441  20
  -2  12  15 84.9110 61.7143  17
   2 -12 -14 2103.05 179.305  19
   2 -12 -14 2386.35 191.412  18
  -2  12  14 2083.37 173.190  17
   2 -12 -14 1967.44 133.671  20
   2 -12 -13 1130.66 147.869  19
   2 -12 -13 1151.14 145.449  18
   2 -12 -13 1005.89 117.164  20
   2 -12 -13 1039.62 115.100  10
   2 -12 -12 72.2765 67.9523  10
   2 -12 -12 212.788 109.553  18
   2 -12 -12 150.076 80.0365  20
   2 -12 -12 105.718 98.0660  19
   2 -12 -12 232.394 82.7236  15
   2 -12 -11 334.056 89.6644  10
   2 -12 -11 145.999 80.2906  15
   2 -12 -11 121.470 90.7891  18
   2 -12 -11 121.655 89.2557  20
   2 -12 -11 77.2600 94.0078  19
   2 -12 -10-4.21295 73.6831  15
   2 -12 -10 158.256 100.848  18
   2 -12 -10-4.86461 84.7156  19
   2 -12 -10 82.7006 92.7859  20
   2 -12  -9 704.700 123.036  15
   2 -12  -9 453.559 128.067  18
   2 -12  -9 547.123 129.426  19
   2 -12  -8 177.477 74.1706   9
   2 -12  -8 38.1854 92.2525  18
   2 -12  -8 140.551 88.4723  13
   2 -12  -8 110.725 112.514  19
   2 -12  -8-84.4139 77.0736  15
   2 -12  -7 539.610 122.544  13
   2 -12  -7 513.686 133.864  18
   2 -12  -7 436.254 97.3923   9
   2 -12  -7 405.165 118.600  19
   2 -12  -7 383.038 91.8379  15
   2 -12  -6 505.337 99.6521   9
  -2  12   6 283.354 95.2916  16
   2 -12  -6 227.099 93.2867  13
   2 -12  -6 322.326 107.498  18
   2 -12  -6 305.746 84.1046  15
   2 -12  -5 2097.64 308.062   3
   2 -12  -5 2184.85 163.862  15
  -2  12   5 2035.98 335.046   2
   2 -12  -5 2096.36 161.485   9
   2 -12  -5 2324.91 216.561  18
  -2  12   5 2325.10 200.489  16
   2 -12  -5 2111.15 193.978  13
  -2  12   4 144.365 153.567   5
   2 -12  -4-105.590 89.0086  18
   2 -12  -4-32.8467 66.1386  15
  -2  12   4 89.2876 121.197   2
  -2  12   4 142.380 75.2396  16
   2 -12  -4 8.63069 80.7343  13
   2 -12  -4 63.7563 67.4398   9
  -2  12   3 725.022 241.680   5
   2 -12  -3 901.114 120.417   9
  -2  12   3 700.446 130.546  16
   2 -12  -3 712.045 97.1042  15
  -2  12   3 1126.61 253.497   2
   2 -12  -3 551.616 184.922   3
   2 -12  -3 795.709 127.680  13
   2 -12  -3 675.558 114.547  18
   2 -12  -2 611.573 100.546   9
  -2  12   2 596.426 266.947   5
   2 -12  -2 443.525 98.1380  13
   2 -12  -2 743.320 120.602  18
  -2  12   2 537.174 205.287   2
  -2  12   2 485.690 117.003  16
   2 -12  -2 413.219 149.548   3
   2 -12  -1 725.266 120.272  18
  -2  12   1 595.367 235.465   2
  -2  12   1 664.390 140.554  16
   2 -12  -1 540.252 100.559  13
   2 -12  -1 741.051 171.153   3
   2 -12  -1 656.396 97.9207   9
  -2  12   0 186.873 107.321  16
  -2  12   0 117.651 160.159   2
   2 -12   0-81.7752 95.7448   3
   2 -12   0 107.958 71.5635  13
  -2  12  -1 1269.20 257.507   2
   2 -12   1 2072.95 259.415  21
   2 -12   2 2421.49 287.002  21
  -2  12  -2 2712.41 365.242   2
   2 -12   3 1776.44 271.114  21
  -2  12  -3 1385.32 289.006   2
  -2  12  -4 138.576 101.937   1
   2 -12   4 254.862 86.3754  13
   2 -12   4 158.526 108.372  21
   2 -12   5 15028.6 788.359  21
  -2  12  -5 15770.9 879.597   2
   2 -12   5 16310.1 505.665  13
   2 -12   6 27940.0 1112.51  21
  -2  12  -6 27892.2 1214.61   2
   2 -12   6 28342.5 712.515  13
   2 -12   7 264.989 83.4727  18
  -2  12  -7 579.957 216.111   2
   2 -12   7 308.153 167.290  21
  -2  12  -7 702.333 113.114  11
   2 -12   7 401.242 97.2608  13
  -2  12  -8 1479.59 305.040   2
   2 -12   8 1723.50 291.605  21
   2 -12   8 1253.86 147.898  13
   2 -12   8 1561.10 159.205  18
  -2  12  -8 1469.00 161.281  11
   2 -12   9 2468.83 201.379  13
   2 -12   9 2372.58 328.087  21
  -2  12  -9 3104.59 437.041   2
  -2  12  -9 2438.88 204.205  11
   2 -12  10 2093.23 182.744  13
  -2  12 -10 1775.87 180.703  11
  -2  12 -11 3901.73 268.218  11
   2 -12  11 3515.50 249.229  13
   2 -12  12 127.084 97.7506  13
  -2  12 -12 149.929 72.1504  14
  -2  12 -12 292.757 121.567  11
  -2  12 -13 1805.31 167.685  14
   2 -12  13 1888.85 199.126  13
   2 -12  14 1002.46 155.157  13
  -2  12 -14 1169.29 165.533  11
  -2  12 -14 1023.95 124.810  14
  -2  12 -15 2656.29 226.262  11
  -2  12 -15 2196.40 178.824  14
   2 -12  15 2528.94 217.369  13
  -2  12 -16-13.1810 93.1853  11
  -2  12 -16 58.8818 74.7486  14
   2 -12  16 154.106 89.6914  13
   2 -12  17 2408.03 197.735  13
  -2  12 -17 2372.79 197.720  11
  -2  12 -17 2342.90 177.791  14
   2 -12  18 2095.29 172.159  13
  -2  12 -18 1910.99 159.878  14
  -2  12 -18 2149.85 171.567  11
  -2  12 -19 2093.06 155.775  14
  -2  12 -19 2082.24 149.797  11
   2 -12  19 1892.23 152.292  13
  -2  12 -20 1212.18 110.689  11
  -2  12 -20 1135.54 108.757  14
   2 -12  20 1363.58 114.344  13
  -2  12 -21 1422.51 96.3023  11
   2 -12  21 1545.52 104.891  13
   2 -11 -18 1687.43 110.717  19
  -2  11  18 1573.15 101.425  17
   2 -11 -17 1330.10 90.7695  10
   2 -11 -17 1394.38 124.355  19
  -2  11  17 1367.71 116.518  17
  -2  11  16 110.017 64.5475  17
   2 -11 -16 284.671 82.7369  19
   2 -11 -16 135.592 54.6014  10
   2 -11 -15 39.8106 48.4831  20
   2 -11 -15 100.293 66.5422  10
   2 -11 -15 81.9772 84.1826  18
   2 -11 -15 136.300 83.4368  19
  -2  11  15 74.7803 84.2046  17
   2 -11 -14 1645.67 181.739  18
   2 -11 -14 1355.30 126.456  15
   2 -11 -14 1355.53 123.956  20
   2 -11 -14 1327.18 136.407  10
   2 -11 -14 1407.14 164.485  19
   2 -11 -13 454.757 101.033  20
   2 -11 -13 433.495 123.342  19
   2 -11 -13 662.903 103.949  15
   2 -11 -13 602.056 99.1044  10
   2 -11 -12 2105.41 211.641  18
   2 -11 -12 1570.04 164.602  20
   2 -11 -12 1535.90 186.344  19
   2 -11 -12 1607.93 151.022  15
   2 -11 -12 1655.09 164.803  10
   2 -11 -11 14.6030 83.4319  20
   2 -11 -11 17.2196 73.9449  15
   2 -11 -11-8.87047 91.6111  19
   2 -11 -11 58.5356 69.8557  10
   2 -11 -11 5.35039 90.3773  18
   2 -11 -10 881.290 142.417  18
   2 -11 -10 833.431 138.243  20
   2 -11 -10 920.064 127.755  10
   2 -11 -10 937.724 125.569  15
   2 -11 -10 1046.67 161.257  19
   2 -11  -9 3196.55 254.383  18
   2 -11  -9 3162.52 200.109  15
   2 -11  -9 3213.62 183.672   9
   2 -11  -9 3079.23 227.901  13
   2 -11  -9 3323.58 268.111  19
   2 -11  -8 1052.08 141.065  13
   2 -11  -8 1360.11 181.224  19
   2 -11  -8 1236.03 131.848  15
   2 -11  -8 1153.44 118.624   9
   2 -11  -8 1598.38 188.535  18
   2 -11  -7 153.462 87.0033  15
   2 -11  -7 253.133 111.413  19
   2 -11  -7 159.897 63.4603   9
   2 -11  -7-107.620 181.411   3
   2 -11  -7 210.229 103.705  18
  -2  11   7 10.6503 138.538   2
   2 -11  -7 255.567 115.028  13
   2 -11  -6 352.240 108.178  18
   2 -11  -6 302.571 92.3074  13
  -2  11   6 178.213 78.7835  16
   2 -11  -6 411.621 92.3413  15
   2 -11  -6 559.660 217.260   3
   2 -11  -6 490.975 83.8878   9
  -2  11   6 603.885 223.513   2
  -2  11   5 242.772 148.000   5
   2 -11  -5 587.438 100.885  15
   2 -11  -5 486.220 102.705  18
   2 -11  -5 473.639 92.2831   9
  -2  11   5 413.182 197.255   2
   2 -11  -5 573.039 111.676  13
   2 -11  -5 434.525 188.676   3
  -2  11   4 171.739 187.563   5
  -2  11   4 550.603 199.965   2
   2 -11  -4 407.093 169.471   3
   2 -11  -3 4569.56 415.544   3
  -2  11   3 4333.88 459.764   2
  -2  11   2 6164.44 527.484   2
   2 -11  -2 5919.96 457.611   3
   2 -11  -1 5983.73 449.303   3
  -2  11   1 6853.30 554.155   2
   2 -11   0 854.344 152.838  21
  -2  11   0 973.238 227.215   2
   2 -11   0 1020.56 188.220   3
   2 -11   1 138.869 97.7191  21
   2 -11   1 132.148 103.975   3
  -2  11  -1 93.7720 112.789   2
  -2  11  -2 4338.32 442.738   2
   2 -11   2 4243.95 365.333  21
   2 -11   2 4031.50 326.843   3
   2 -11   3-90.5019 111.871  21
  -2  11  -3 134.613 123.476   2
  -2  11  -4 2702.44 357.970   2
   2 -11   4 2872.60 341.205  21
   2 -11   5 3554.63 370.603  21
  -2  11  -5 3348.01 402.316   2
  -2  11  -5 3364.00 365.216   1
  -2  11  -6 4648.30 481.296   2
   2 -11   6 4312.14 421.248  21
   2 -11   7 8725.99 594.078  21
  -2  11  -7 8545.42 643.689   2
   2 -11   8 142.918 141.176  21
  -2  11  -8 55.3485 130.540   2
  -2  11  -9 130.417 78.8377  11
   2 -11   9-48.1067 164.962  21
  -2  11  -9-9.44067 131.331   2
   2 -11   9 139.828 76.3503  13
   2 -11  10 299.442 162.813  21
  -2  11 -10 329.418 226.981   2
  -2  11 -10 28.4696 80.7901  11
   2 -11  10 149.342 75.8484  13
   2 -11  11 522.808 111.268  13
  -2  11 -11 265.820 63.3635  14
  -2  11 -11 219.718 87.2658  11
   2 -11  11 401.891 182.913  21
   2 -11  12 1510.49 165.091  13
  -2  11 -12 1603.99 188.299  11
  -2  11 -12 1138.32 139.947  14
  -2  11 -13 658.446 104.857  14
   2 -11  13 757.215 128.683  13
  -2  11 -13 934.216 163.835  11
   2 -11  14 1545.42 173.754  13
  -2  11 -14 1409.54 155.141  14
  -2  11 -14 1446.17 180.634  11
   2 -11  15 6983.82 344.670  13
  -2  11 -15 7241.26 365.469  11
  -2  11 -15 6438.94 318.510  14
   2 -11  16 831.694 138.106  13
  -2  11 -16 868.040 151.663  11
  -2  11 -16 943.838 135.451  14
   2 -11  17 945.486 139.080  13
  -2  11 -17 868.364 130.151  14
  -2  11 -17 892.442 137.590  11
   2 -11  18 1083.50 131.521  13
  -2  11 -18 1237.34 145.963  11
  -2  11 -18 1158.75 142.803  14
   2 -11  19 3314.39 205.258  13
  -2  11 -19 3388.66 204.105  11
  -2  11 -19 3738.25 215.802  14
   2 -11  20 392.783 81.9770  13
  -2  11 -20 476.346 91.4417  14
  -2  11 -20 594.674 94.3023  11
  -2  11 -21 66.3929 46.3496  11
  -2  11 -21 13.8853 51.2124  14
  -2  11 -22 276.330 45.0700  11
   2 -11  22 226.187 45.2200  13
  -2  10  19 29.6476 38.8671  17
   2 -10 -19 72.3808 48.2839  19
  -2  10  18 180.695 60.7285  17
   2 -10 -18 138.486 59.3872  19
   2 -10 -18 290.877 60.9817  10
   2 -10 -17 1174.11 135.672  19
   2 -10 -17 1106.97 112.084  10
  -2  10  17 1167.66 127.297  17
   2 -10 -16 735.463 98.2360  10
   2 -10 -16 713.530 123.577  19
  -2  10  16 787.632 118.686  17
   2 -10 -15 1921.56 193.122  18
   2 -10 -15 2033.57 197.665  19
   2 -10 -15 1850.77 165.300  10
   2 -10 -15 1911.25 147.760  20
   2 -10 -14 6065.78 278.517  20
   2 -10 -14 6326.74 345.206  18
   2 -10 -14 5687.79 291.205  10
   2 -10 -14 6167.99 342.935  19
   2 -10 -14 6100.45 267.503  15
   2 -10 -13 1824.00 190.126  18
   2 -10 -13 1924.31 158.783  15
   2 -10 -13 1939.21 171.707  20
   2 -10 -13 1862.73 179.203  10
   2 -10 -13 1664.10 199.170  19
   2 -10 -12 4085.53 298.368  19
   2 -10 -12 4402.90 268.922  10
   2 -10 -12 4857.28 253.156  15
   2 -10 -12 4628.21 308.779  18
   2 -10 -12 4925.82 274.405  20
   2 -10 -11 7493.50 389.502  18
   2 -10 -11 7583.13 345.904  10
   2 -10 -11 7293.49 392.535  19
   2 -10 -11 6817.27 296.959  15
   2 -10 -11 6853.36 333.121  20
   2 -10 -10 13.1869 76.8328  15
   2 -10 -10-82.9426 94.1406  18
   2 -10 -10 3.56708 68.4301  10
   2 -10 -10 15.9570 86.5395  19
   2 -10 -10-107.247 57.3117   9
  -2  10   9 63.8171 175.671   2
   2 -10  -9 144.221 63.3402   9
   2 -10  -9 103.153 88.6856  18
   2 -10  -9 14.7690 85.1158  13
   2 -10  -9 93.8692 81.3838  19
   2 -10  -9 250.058 156.850   3
   2 -10  -9 115.728 66.4286  10
   2 -10  -9 94.1876 76.2612  15
   2 -10  -8 25.9930 82.4230  19
   2 -10  -8 22.2322 57.5985   9
   2 -10  -8 76.0179 77.3574  13
   2 -10  -8 43.1916 67.7932  15
   2 -10  -8 318.623 194.073   3
   2 -10  -8-45.5508 76.7382  18
  -2  10   8-11.9142 139.717   2
  -2  10   7 291.875 163.676   2
   2 -10  -7 386.283 110.499  19
   2 -10  -7 52.5823 116.021   3
   2 -10  -7 504.423 94.6825  15
  -2  10   6 241.672 135.685   2
  -2  10   6-118.294 128.069   5
   2 -10  -6 235.336 142.019   3
   2 -10  -5 7247.54 540.358   3
  -2  10   5 6815.07 555.892   2
  -2  10   5 6046.67 534.258   5
   2 -10  -4 12137.2 675.260   3
  -2  10   4 11293.3 703.164   2
   2 -10  -3 416.861 175.306   3
  -2  10   3 298.376 108.234   2
   2 -10  -2 2752.34 307.195   3
  -2  10   2 2880.18 358.361   2
   2 -10  -1 52441.9 1224.32  21
  -2  10   1 51158.8 1535.67   2
   2 -10  -1 49888.3 1361.29   3
   2 -10   0 6084.59 388.609  21
  -2  10   0 6280.13 496.475   2
   2 -10   0 6262.99 414.921   3
   2 -10   1 943.360 166.098   3
  -2  10  -1 696.645 188.358   2
   2 -10   1 818.544 169.276  21
   2 -10   2 8317.28 445.747   3
  -2  10  -2 8768.28 585.689   2
   2 -10   2 8449.97 500.102  21
   2 -10   3 354.387 132.629  21
   2 -10   3 372.432 88.7318   3
  -2  10  -3 473.974 176.294   2
   2 -10   4 2936.60 313.033  21
  -2  10  -4 3662.78 391.075   2
   2 -10   5 4394.90 395.003  21
  -2  10  -5 4907.33 452.130   2
  -2  10  -5 4351.60 371.457   1
  -2  10  -6 6106.26 515.316   2
   2 -10   6 5722.88 453.260  21
  -2  10  -6 5729.51 427.032   1
  -2  10  -7 9967.17 666.385   2
   2 -10   7 10328.3 623.692  21
  -2  10  -7 9756.51 549.876   1
  -2  10  -8 1597.00 272.681   2
   2 -10   8 1521.79 263.467  21
  -2  10  -9 1769.08 320.052   2
   2 -10   9 1597.18 264.345  21
   2 -10   9 1455.44 284.599   6
   2 -10  10 1566.95 308.302   6
   2 -10  10 2589.73 327.077  21
  -2  10 -10 2384.79 362.539   2
   2 -10  11 3031.10 210.745  13
   2 -10  11 2963.19 421.644   6
  -2  10 -11 3104.04 236.260  11
   2 -10  11 2859.23 344.174  21
  -2  10 -11 3035.94 445.108   2
   2 -10  12 315.170 97.6736  13
  -2  10 -12 136.832 63.7932  14
  -2  10 -12 370.033 112.141  11
  -2  10 -12 157.006 175.928   2
   2 -10  12 203.835 149.100   6
   2 -10  12 445.377 170.238  21
   2 -10  13 420.330 174.504  21
  -2  10 -13 213.926 100.712  11
  -2  10 -13 298.802 97.5261  14
   2 -10  13 255.954 105.232  13
  -2  10 -13 538.255 185.861   2
  -2  10 -14 307.678 92.2848  14
  -2  10 -14 285.412 120.599  11
   2 -10  14 257.445 96.0014  13
   2 -10  15 1442.94 170.959  13
  -2  10 -15 1257.64 151.300  14
  -2  10 -15 1519.61 190.744  11
   2 -10  16 12958.8 479.485  13
  -2  10 -16 13768.1 486.972  14
  -2  10 -16 13164.4 496.265  11
  -2  10 -17 917.899 140.241  14
  -2  10 -17 819.364 145.859  11
   2 -10  17 808.335 135.902  13
  -2  10 -18 2955.50 217.834  14
   2 -10  18 2515.91 199.563  13
  -2  10 -18 2541.44 206.620  11
   2 -10  19 962.926 127.083  13
  -2  10 -19 990.342 135.288  14
  -2  10 -19 1085.84 136.302  11
   2 -10  20 491.935 95.0704  13
  -2  10 -20 467.810 94.8101  11
  -2  10 -20 623.691 106.131  14
  -2  10 -21 398.992 72.2689  11
  -2  10 -21 512.742 88.4241  14
   2 -10  21 431.470 77.2212  13
   2 -10  22 2789.44 135.916  13
  -2  10 -22 2801.72 154.195  14
  -2  10 -22 2569.72 116.384  11
  -2   9  20 5081.30 182.424  17
   2  -9 -20 5498.42 210.217  19
   2  -9 -19 1124.82 116.645  19
  -2   9  19 1133.02 104.539  17
   2  -9 -19 929.565 90.0673  10
  -2   9  18 714.785 104.927  17
   2  -9 -18 690.773 112.071  19
   2  -9 -18 639.842 98.5398  10
  -2   9  17 464.271 109.389  17
   2  -9 -17 364.659 104.920  19
   2  -9 -17 407.496 88.9437  10
   2  -9 -16 3104.23 241.503  19
   2  -9 -16 2930.08 174.255  20
  -2   9  16 3318.65 231.362  17
   2  -9 -16 3127.54 220.104  10
   2  -9 -15 2077.08 166.284  20
   2  -9 -15 1969.22 198.616  18
   2  -9 -15 2075.49 189.938  10
   2  -9 -15 1949.41 153.377  15
   2  -9 -15 1929.27 209.212  19
   2  -9 -14 5571.61 300.449  10
   2  -9 -14 4766.33 260.549  20
   2  -9 -14 5587.77 335.947  18
   2  -9 -14 5148.11 328.597  19
   2  -9 -14 4981.69 247.460  15
   2  -9 -13 4238.69 229.680  15
   2  -9 -13 4548.59 310.341  18
   2  -9 -13 4093.05 245.400  20
   2  -9 -13 4255.80 265.519  10
   2  -9 -13 4206.20 295.625  19
   2  -9 -12 334.353 106.741  10
   2  -9 -12 104.425 101.678  18
   2  -9 -12 226.162 88.3787  20
   2  -9 -12 102.457 106.454  19
   2  -9 -12 277.780 91.5398  15
  -2   9  11 12642.1 815.018   2
   2  -9 -11 14956.5 554.743  19
   2  -9 -11 13633.6 428.378  15
  -2   9  11 13940.9 909.604   6
   2  -9 -11 14554.5 856.028   3
   2  -9 -11 14844.9 494.754  10
   2  -9 -11 13123.0 462.970  20
   2  -9 -11 14486.1 540.595  18
   2  -9 -10 1536.70 146.883  15
  -2   9  10 1388.57 257.170   2
   2  -9 -10 1689.11 165.894  10
   2  -9 -10 1479.30 182.575  19
  -2   9  10 1587.23 330.497   6
   2  -9 -10 1448.06 284.744   3
   2  -9 -10 1459.28 117.948   9
   2  -9 -10 1559.27 176.923  18
  -2   9   9 1866.73 326.160   2
   2  -9  -9 2457.63 367.317   3
   2  -9  -9 2411.65 217.762  19
   2  -9  -9 2749.05 179.948  15
   2  -9  -9 2636.16 212.012  18
   2  -9  -9 2144.33 184.945  13
  -2   9   8 2627.73 381.353  22
   2  -9  -8 2823.98 374.313   3
  -2   9   8 3634.73 421.420   2
   2  -9  -7 579.239 192.763   3
  -2   9   7 669.639 197.436  22
  -2   9   7 581.622 162.844   2
  -2   9   6 2799.06 343.798   2
  -2   9   6 2939.21 353.588   5
   2  -9  -6 2594.27 335.048   3
  -2   9   6 2355.88 331.554  22
  -2   9   5 19684.8 923.619  22
   2  -9  -5 21178.7 901.040   3
  -2   9   5 20583.7 933.983   2
  -2   9   4 17492.7 813.287  22
   2  -9  -4 20361.2 846.363   3
  -2   9   4 18836.5 864.176   2
  -2   9   3 2172.55 288.523   2
   2  -9  -3 2280.44 273.690   3
  -2   9   2 7703.07 544.028   2
   2  -9  -2 8273.02 386.090  21
   2  -9  -2 7950.40 482.276   3
  -2   9   1 885.452 189.720   2
   2  -9  -1 995.009 146.007  21
   2  -9  -1 906.864 169.447   3
  -2   9   0 2187.62 280.508   2
   2  -9   0 1821.37 211.654  21
   2  -9   0 2087.32 233.084   3
  -2   9  -1 6384.14 469.898   2
   2  -9   1 6845.90 407.922  21
   2  -9   1 6938.39 398.045   3
   2  -9   2 12954.0 538.377   3
   2  -9   2 13362.0 594.703  21
  -2   9  -2 13054.4 678.865   2
  -2   9  -3 130.473 94.2732   2
   2  -9   3 173.636 86.5854  21
   2  -9   3 134.541 71.0482   3
  -2   9  -4 459.308 149.525   2
   2  -9   4 353.313 128.121  21
   2  -9   4 276.757 94.1055   3
   2  -9   5 16280.3 712.522  21
  -2   9  -5 15891.8 773.503   2
  -2   9  -5 15726.9 685.774   1
  -2   9  -6 450.261 160.310   2
   2  -9   6 617.402 157.435  21
  -2   9  -6 552.794 133.844   1
  -2   9  -7 335.182 151.424   2
  -2   9  -7 248.162 117.443   1
   2  -9   7 426.425 155.897   6
   2  -9   7 516.772 164.504  21
  -2   9  -8 239.040 157.535   2
   2  -9   8 176.376 140.202   6
  -2   9  -8 211.956 110.499   1
   2  -9   8 197.943 118.840  21
  -2   9  -9 4554.77 450.683   2
   2  -9   9 4339.44 465.352   6
   2  -9   9 4171.28 377.317  21
   2  -9  10 503.604 162.188  21
  -2   9 -10 732.820 222.867   2
   2  -9  10 741.528 224.725   6
   2  -9  11 10078.8 608.257  21
   2  -9  11 9153.63 715.131   6
  -2   9 -11 10087.8 719.519   2
  -2   9 -12 352.534 100.886  11
  -2   9 -12-14.4664 180.900   2
   2  -9  12 235.918 130.678  21
   2  -9  12 326.326 98.0982  13
   2  -9  12 27.0461 152.961   6
  -2   9 -12 159.157 82.3874  19
  -2   9 -13 1655.64 178.099  11
   2  -9  13 1560.00 165.479  13
   2  -9  13 1571.09 337.185   6
   2  -9  13 1531.43 244.851  21
  -2   9 -13 1495.72 294.126   2
  -2   9 -13 1201.92 162.788  19
  -2   9 -13 1361.33 147.689  14
  -2   9 -14 168.590 93.9178  11
   2  -9  14 242.941 82.0889  13
  -2   9 -14 140.132 72.4876  19
   2  -9  14-52.4288 160.501   6
  -2   9 -14 138.742 85.7447  14
   2  -9  14 134.416 114.415  21
   2  -9  15 272.325 101.972  13
  -2   9 -15 238.767 106.512  19
  -2   9 -15 292.287 102.593  14
  -2   9 -15 139.065 108.843  11
   2  -9  16 2987.54 223.591  13
  -2   9 -16 2850.46 251.970  19
  -2   9 -16 3107.71 240.966  14
  -2   9 -16 3336.42 252.108  11
   2  -9  17 1659.38 173.779  13
  -2   9 -17 1659.05 181.520  14
  -2   9 -17 1825.64 192.844  11
  -2   9 -18 1154.20 155.693  11
   2  -9  18 1298.07 156.202  13
  -2   9 -18 1365.39 163.731  14
  -2   9 -19-41.0911 77.3276  11
  -2   9 -19-21.8124 81.9385  14
  -2   9 -20 1052.44 130.575  14
  -2   9 -20 948.437 114.541  11
   2  -9  20 902.642 111.610  13
   2  -9  21 212.040 65.8515  13
  -2   9 -21 247.581 80.5403  14
  -2   9 -21 285.364 66.9051  11
  -2   9 -22 1616.38 97.4663  11
  -2   9 -22 1755.24 134.017  14
   2  -9  22 1704.34 110.679  13
  -2   9 -23 1250.01 97.3240  14
   2  -9  23 1034.16 66.5075  13
   2  -8 -21 38.1791 42.2832  19
  -2   8  21 29.9475 32.2165  17
   2  -8 -20 2197.45 152.982  19
  -2   8  20 1997.38 130.368  17
   2  -8 -20 1882.91 130.976  10
  -2   8  19 97.5432 61.8229  17
   2  -8 -19 207.667 73.2840  10
   2  -8 -19 20.2532 44.5460  12
   2  -8 -19 21.1968 69.4184  19
   2  -8 -18 697.126 111.089  10
  -2   8  18 711.737 114.424  17
   2  -8 -18 764.405 90.1480  12
   2  -8 -18 809.759 139.849  19
   2  -8 -18 748.364 82.4974   8
   2  -8 -17 107.768 103.734  19
   2  -8 -17 180.583 86.1263  10
  -2   8  17 69.8231 87.1774  17
   2  -8 -17-38.9743 55.5242   8
   2  -8 -16 3221.01 256.995  19
   2  -8 -16 3195.48 185.002  15
   2  -8 -16 3301.09 178.265   8
   2  -8 -16 3124.44 234.504  10
   2  -8 -16 3208.56 253.248  18
   2  -8 -16 3161.30 191.387  20
  -2   8  16 3671.16 250.138  17
   2  -8 -15 861.445 160.554  18
   2  -8 -15 759.997 118.280  20
   2  -8 -15 774.553 148.056  19
   2  -8 -15 798.835 108.615  15
   2  -8 -15 768.851 104.377   8
   2  -8 -15 965.107 148.756  10
   2  -8 -14 2828.47 248.288  19
   2  -8 -14 2736.16 172.812   8
   2  -8 -14 2630.74 239.006  18
   2  -8 -14 2830.65 183.067  15
   2  -8 -14 2795.63 222.960  10
   2  -8 -14 2785.03 196.970  20
   2  -8 -13 13988.8 462.320  20
   2  -8 -13 13800.0 544.938  19
   2  -8 -13 14003.4 500.663  10
   2  -8 -13 15040.3 552.421  18
   2  -8 -13 12917.2 401.365   8
   2  -8 -13 13591.4 422.026  15
  -2   8  12 9932.42 701.894   2
   2  -8 -12 11236.9 468.465  18
   2  -8 -12 11891.7 490.568  19
   2  -8 -12 10626.2 371.254  15
   2  -8 -12 10912.2 427.269  10
   2  -8 -12 11413.4 728.065   3
  -2   8  12 11582.2 826.648   6
   2  -8 -12 10703.1 402.114  20
   2  -8 -11 525.011 96.5305  10
   2  -8 -11 289.037 76.5235  20
   2  -8 -11 442.323 191.286   3
   2  -8 -11 603.647 134.425  19
  -2   8  11 275.170 151.909   2
   2  -8 -11 487.615 94.3877  15
   2  -8 -11 438.265 113.304  18
  -2   8  11 399.840 197.742   6
  -2   8  10 491.893 187.605   6
  -2   8  10 396.048 173.218   2
   2  -8 -10 470.521 202.496   3
   2  -8  -9 1329.69 256.929   3
  -2   8   9 836.291 254.568  22
  -2   8   9 982.402 220.464   2
  -2   8   8 94.1487 138.912  22
  -2   8   8 221.768 143.773   2
   2  -8  -8 351.406 162.161   3
  -2   8   7 7934.28 569.781   2
  -2   8   7 7658.86 599.300  22
   2  -8  -7 9206.77 592.256   3
  -2   8   6 11416.3 660.874   2
   2  -8  -6 11763.1 663.255   3
  -2   8   6 10843.8 692.004  22
   2  -8  -5 680.322 173.951   3
  -2   8   5 526.220 166.171  22
  -2   8   5 885.531 186.216   2
   2  -8  -4 539.519 160.208   3
  -2   8   4 451.299 155.762   2
   2  -8  -3 29236.4 939.929   3
  -2   8   3 28026.3 980.229   2
   2  -8  -3 28554.3 697.082  21
  -2   8   2 2194.25 263.947   2
   2  -8  -2 2171.36 237.124   3
   2  -8  -2 2042.47 176.083  21
   2  -8  -1 4578.54 332.801   3
  -2   8   1 4587.66 374.110   2
   2  -8  -1 4503.17 279.332  21
   2  -8   0 27538.5 789.122  21
   2  -8   0 27833.4 827.081   3
  -2   8   0 28024.6 951.355   2
   2  -8   1 88.0621 77.3662   3
  -2   8  -1 179.507 102.493   2
   2  -8   1 141.336 75.0782  21
   2  -8   2 3019.90 263.408  21
  -2   8  -2 2936.81 298.869   2
   2  -8   2 2998.10 240.318   3
   2  -8   3 216.071 79.8618   3
  -2   8  -3 191.254 118.964   2
   2  -8   3 215.480 97.6921  21
   2  -8   4 3437.61 293.454  21
  -2   8  -4 3688.56 348.318   2
   2  -8   4 3937.52 260.985   3
  -2   8  -5 6189.16 394.977   1
   2  -8   5 6322.13 469.963   6
   2  -8   5 6361.34 407.350  21
   2  -8   5 6559.77 323.809   3
  -2   8  -5 5889.18 443.126   2
   2  -8   6 342.514 143.836   6
  -2   8  -6 207.258 102.612   1
  -2   8  -6 187.370 100.788   2
   2  -8   6 583.290 142.639  21
  -2   8  -7 10333.6 514.553   1
   2  -8   7 9914.58 619.793   6
   2  -8   7 10554.7 554.914  21
  -2   8  -7 10546.5 614.460   2
  -2   8  -8 16219.0 662.150   1
   2  -8   8 16880.6 843.370   6
   2  -8   8 17351.6 733.849  21
  -2   8  -8 17498.8 824.680   2
   2  -8   9 2349.66 330.826   6
  -2   8  -9 2236.14 241.633   1
   2  -8   9 2367.58 273.823  21
  -2   8  -9 2038.74 293.215   2
   2  -8  10 654.042 198.699   6
  -2   8 -10 801.358 233.295   2
   2  -8  10 667.077 156.918  21
   2  -8  11 1370.65 224.323  21
  -2   8 -11 1900.54 320.972   2
   2  -8  11 1780.86 317.339   6
  -2   8 -12 5323.59 530.887   2
   2  -8  12 4930.99 511.159   6
   2  -8  12 4699.08 385.698  21
   2  -8  13 6079.09 590.150   6
  -2   8 -13 5825.83 553.616   2
  -2   8 -13 4860.95 297.140  19
   2  -8  13 5723.13 425.600  21
  -2   8 -13 5771.35 292.407  14
  -2   8 -13 6037.57 316.188  11
   2  -8  13 5749.06 283.494  13
  -2   8 -14 12710.9 475.671  11
   2  -8  14 11967.0 431.380  13
  -2   8 -14 11542.7 478.408  19
   2  -8  14 12590.1 630.747  21
   2  -8  14 11651.5 839.252   6
  -2   8 -14 13121.4 461.575  14
  -2   8 -15 5667.46 309.034  14
  -2   8 -15 5415.16 311.441  11
  -2   8 -15 5233.26 321.738  19
   2  -8  15 5261.46 287.947  13
  -2   8 -16 747.185 143.820  19
   2  -8  16 877.892 127.029  13
  -2   8 -16 783.175 144.127  11
  -2   8 -16 985.842 146.538  14
  -2   8 -17 403.557 124.677  11
   2  -8  17 208.810 91.5520  13
  -2   8 -17 368.371 122.850  19
  -2   8 -17 423.463 113.680  14
   2  -8  18 5763.38 293.471  13
  -2   8 -18 5577.50 339.852  19
  -2   8 -18 5805.93 301.592  11
  -2   8 -18 5880.28 320.238  14
  -2   8 -19 5244.95 316.536  19
   2  -8  19 5047.54 264.253  13
  -2   8 -19 5093.96 269.874  11
  -2   8 -19 5337.83 299.154  14
   2  -8  20 1325.25 137.895  13
  -2   8 -20 1413.01 155.371  14
  -2   8 -20 1184.46 154.915  19
  -2   8 -20 1128.46 121.027  11
  -2   8 -21 3434.83 176.650  11
  -2   8 -21 4039.86 226.692  14
   2  -8  21 3487.93 193.082  13
   2  -8  22 38.4532 50.3000  13
  -2   8 -22-11.7283 60.0790  14
  -2   8 -23 1688.46 122.165  14
   2  -8  23 1498.05 87.7017  13
   2  -7 -22 446.374 65.5207  19
   2  -7 -21 1125.46 110.281  19
   2  -7 -21 918.536 74.4267  12
  -2   7  21 897.678 82.0298  17
  -2   7  20 1021.74 108.290  17
   2  -7 -20 882.871 89.4296  12
   2  -7 -20 1147.30 134.645  19
   2  -7 -20 783.859 108.668  10
   2  -7 -20 928.815 83.1006   8
   2  -7 -19 478.686 104.940  19
  -2   7  19 425.095 91.0481  17
   2  -7 -19 308.645 66.5336   8
   2  -7 -19 410.935 96.9472  10
   2  -7 -19 453.858 80.8163  12
   2  -7 -18 287.994 107.919  19
   2  -7 -18 458.060 105.847  10
  -2   7  18 333.656 95.8516  17
   2  -7 -18 413.518 79.8336   8
   2  -7 -17 304.885 113.359  19
  -2   7  17 102.762 87.4650  17
   2  -7 -17 168.181 103.281  10
   2  -7 -17 178.306 71.3571   8
   2  -7 -16 2688.99 238.314  19
   2  -7 -16 2706.97 221.922  10
   2  -7 -16 2794.74 177.235  15
   2  -7 -16 2852.68 183.725   8
   2  -7 -15 440.676 91.5784  20
   2  -7 -15 517.124 118.607  10
   2  -7 -15 545.619 138.600  18
   2  -7 -15 292.302 113.488  19
   2  -7 -15 425.167 95.1290  15
   2  -7 -15 389.700 91.4208   8
   2  -7 -14 641.610 139.330  18
   2  -7 -14 389.277 118.304  19
   2  -7 -14 351.453 109.478  10
   2  -7 -14 212.468 81.6083  20
   2  -7 -14 489.247 92.4878  15
   2  -7 -14 400.148 91.0069   8
   2  -7 -13 587.689 127.292  18
   2  -7 -13 706.613 139.028  19
  -2   7  13 618.848 221.254   6
   2  -7 -13 730.076 104.711  15
   2  -7 -13 653.967 111.690  20
   2  -7 -13 558.140 119.338  10
   2  -7 -13 779.916 112.491   8
  -2   7  12 560.995 216.934   6
   2  -7 -12 799.068 138.349  18
   2  -7 -12 674.295 123.350  10
   2  -7 -12 909.666 115.811  15
   2  -7 -12 769.918 114.642  20
   2  -7 -12 1019.14 248.269   3
   2  -7 -12 749.108 149.226  19
   2  -7 -11 13390.0 759.962   3
  -2   7  11 13825.2 876.265   6
   2  -7 -10 1391.05 251.550   3
  -2   7  10 1158.66 262.758   6
  -2   7  10 1276.29 294.606  22
  -2   7   9 4600.97 496.549  22
   2  -7  -9 4981.88 445.688   3
  -2   7   8 834.421 221.072  22
   2  -7  -8 1210.31 222.478   3
  -2   7   7 5483.31 496.372  22
   2  -7  -7 6011.23 459.547   3
  -2   7   6 3485.31 374.563  22
  -2   7   6 3517.17 346.538   2
   2  -7  -6 4303.10 370.645   3
  -2   7   5 114.997 88.9364   2
  -2   7   5 259.122 126.413  22
   2  -7  -5 129.560 95.3350   3
  -2   7   4 35785.5 1089.20   2
   2  -7  -4 39064.5 1091.48   3
   2  -7  -3 16309.7 644.302   3
  -2   7   3 15932.7 664.540   2
   2  -7  -3 15436.6 451.234  21
   2  -7  -2 15773.8 486.284  21
   2  -7  -2 16128.3 609.359   3
  -2   7   2 15875.8 651.731   2
   2  -7  -1 10094.7 445.683   3
  -2   7   1 8932.66 488.594   2
   2  -7  -1 9247.34 378.209  21
  -2   7   0 35758.5 1038.14   2
   2  -7   0 36973.8 907.463   3
   2  -7   0 35325.1 867.728  21
   2  -7   1 36.9779 54.5574  21
  -2   7  -1 11.2284 78.1618   2
   2  -7   1-28.7694 63.7158   3
   2  -7   2 9603.00 397.471   3
   2  -7   2 9304.73 438.616  21
  -2   7  -2 9746.94 498.459   2
   2  -7   3 2474.51 192.655   3
  -2   7  -3 2155.94 241.557   2
   2  -7   3 2254.05 223.219  21
  -2   7  -4 7258.42 405.160   1
  -2   7  -4 7514.17 449.415   2
   2  -7   4 7283.50 328.010   3
   2  -7   4 7924.70 474.178   6
   2  -7   4 6895.65 392.458  21
  -2   7  -5 748.496 83.9164   4
  -2   7  -5 601.390 131.442   1
  -2   7  -5 516.362 143.642   2
   2  -7   5 591.647 148.267   6
   2  -7   5 617.470 138.894  21
   2  -7   5 770.294 107.323   3
  -2   7  -6 50277.5 995.475   4
  -2   7  -6 48985.8 1203.50   1
   2  -7   6 49243.8 1368.73   6
   2  -7   6 50622.3 1018.32   3
   2  -7   6 49473.6 1219.95  21
  -2   7  -6 51207.0 1351.93   2
  -2   7  -7 14173.2 681.645   2
   2  -7   7 13381.5 676.180   6
  -2   7  -7 13144.5 560.462   1
   2  -7   7 14406.1 606.776  21
  -2   7  -7 14095.2 494.378   4
  -2   7  -8 4618.43 298.753   4
   2  -7   8 4981.29 356.349  21
  -2   7  -8 4820.56 410.682   2
   2  -7   8 4977.10 427.201   6
  -2   7  -8 4536.46 327.493   1
  -2   7  -9 6681.33 393.780   4
   2  -7   9 6293.57 407.716  21
   2  -7   9 6373.96 507.348   6
  -2   7  -9 6652.47 503.809   2
  -2   7  -9 6278.77 401.743   1
  -2   7 -10 2789.62 282.282   1
   2  -7  10 2855.53 285.609  21
   2  -7  10 2754.48 347.517   6
  -2   7 -10 2583.14 341.855   2
  -2   7 -10 2848.45 276.994   4
  -2   7 -11 2159.11 259.818   1
  -2   7 -11 2073.12 258.507   4
  -2   7 -11 1967.03 314.722   2
   2  -7  11 2227.97 334.854   6
   2  -7  11 2104.39 239.683  21
  -2   7 -12 5031.57 404.348   4
   2  -7  12 4306.90 477.337   6
   2  -7  12 4541.13 358.189  21
  -2   7 -12 5043.75 496.328   2
  -2   7 -13 1134.90 205.526   4
   2  -7  13 931.007 240.112   6
   2  -7  13 1022.07 187.316  21
  -2   7 -14 6605.16 347.916  19
  -2   7 -14 8071.10 547.567   4
  -2   7 -14 7178.27 333.873  11
   2  -7  14 6341.94 418.554  21
   2  -7  14 7249.91 638.536   6
  -2   7 -14 7522.62 342.274  14
  -2   7 -15 209.495 121.148   4
  -2   7 -15 156.593 91.6963  19
  -2   7 -15 427.385 116.568  14
   2  -7  15 289.787 140.624   6
  -2   7 -15 268.579 97.0494  11
  -2   7 -16 1115.44 157.300  19
  -2   7 -16 1263.55 167.818  11
  -2   7 -16 1077.87 155.509  14
  -2   7 -17 1340.78 180.482  19
  -2   7 -17 1159.25 149.704  11
  -2   7 -17 1466.10 177.477  14
   2  -7  18 484.381 106.815  13
  -2   7 -18 495.869 123.110  14
  -2   7 -18 581.777 132.940  19
  -2   7 -18 578.706 120.440  11
  -2   7 -19 2521.32 188.711  11
  -2   7 -19 2369.09 209.840  14
   2  -7  19 2986.31 199.599  13
  -2   7 -19 2494.21 225.005  19
  -2   7 -20-91.5903 86.5902  19
  -2   7 -20 80.9332 65.1669  11
  -2   7 -20-154.100 96.1961  14
   2  -7  20 0.74604 75.8761  13
  -2   7 -21 2593.65 205.621  19
   2  -7  21 2386.62 158.003  13
  -2   7 -21 2613.88 193.117  14
  -2   7 -22 75.4128 63.0843  14
   2  -7  22 154.966 50.9099  13
   2  -7  23 971.409 71.6310  13
  -2   7 -23 1107.63 103.196  14
   2  -6 -22 935.761 76.1940  12
   2  -6 -22 1106.97 108.670  19
  -2   6  22 882.299 72.9822  17
   2  -6 -21 365.160 94.7820  19
  -2   6  21 350.281 66.6379  17
   2  -6 -21 293.914 64.5127  12
   2  -6 -21 292.379 59.6473   8
   2  -6 -20 245.125 64.6245   8
   2  -6 -20 442.296 87.2882  12
  -2   6  20 260.667 73.7107  17
[truncated: 2,221,782 more chars]
